# Supplementary material for: In Silico Evaluation of Natural Compounds for an Acidic Extracellular Environment in Human Breast Cancer
Source: Cells. 2021 Oct 6;10(10):2673. doi: 10.3390/cells10102673 (PMC8534855; doi:10.3390/cells10102673)
Supplement: Supplementary file 1 [file cells-10-02673-s001.zip]

Archive with 7 entries (7 files):
- Supplementary Figures.pdf
- Table_S1.xlsx
- Table_S2.xlsx
- Table_S3.xlsx
- Table_S4.xlsx
- Table_S5.xlsx
- Table_S6.xlsx
