# Supplementary material for: In Silico Evaluation of Natural Compounds for an Acidic Extracellular Environment in Human Breast Cancer
Source: Cells. 2021 Oct 6;10(10):2673. doi: 10.3390/cells10102673 (PMC8534855; doi:10.3390/cells10102673)
Supplement: Supplementary file 1 [file cells-10-02673-s001.zip › Supplementary Figures.pdf]

# Supplementary Figures

**A**

GSM4909307 (ER+)

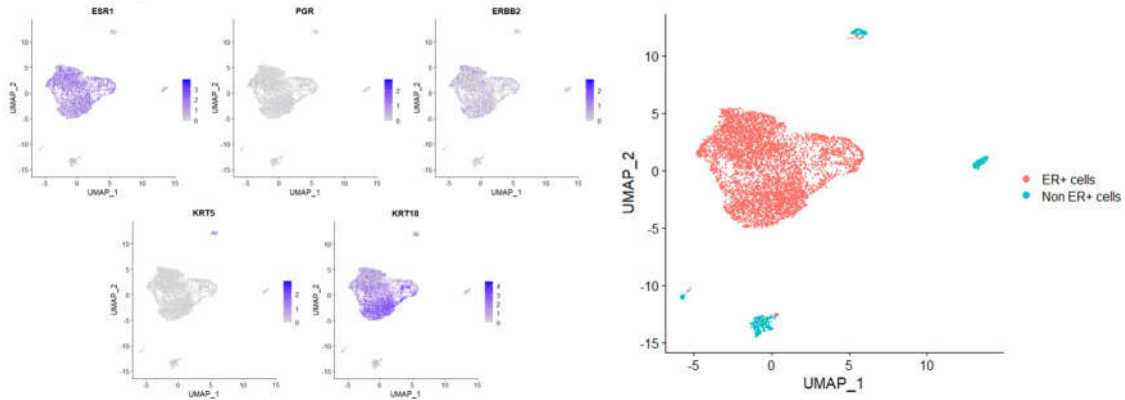

**B**

GSM4909299 (ER+)

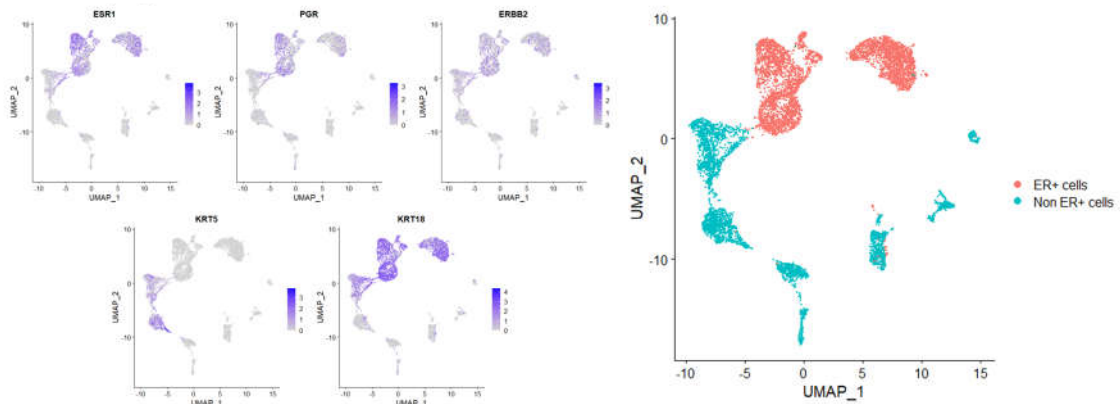

**C**

GSM4909315 (ER+)

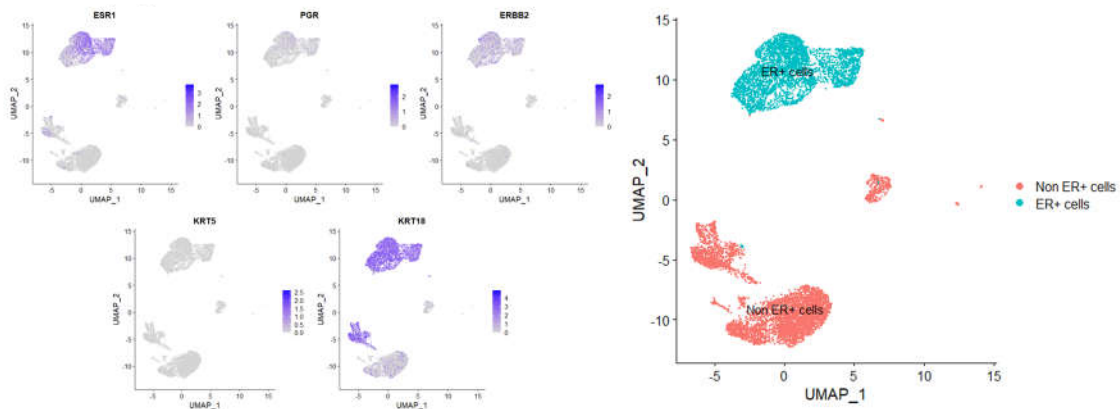

**Figure S1** Segmentation of ER<sup>+</sup> breast cancer cells from single cell data with patients.

**A**

GSM4909290 (HER2+)

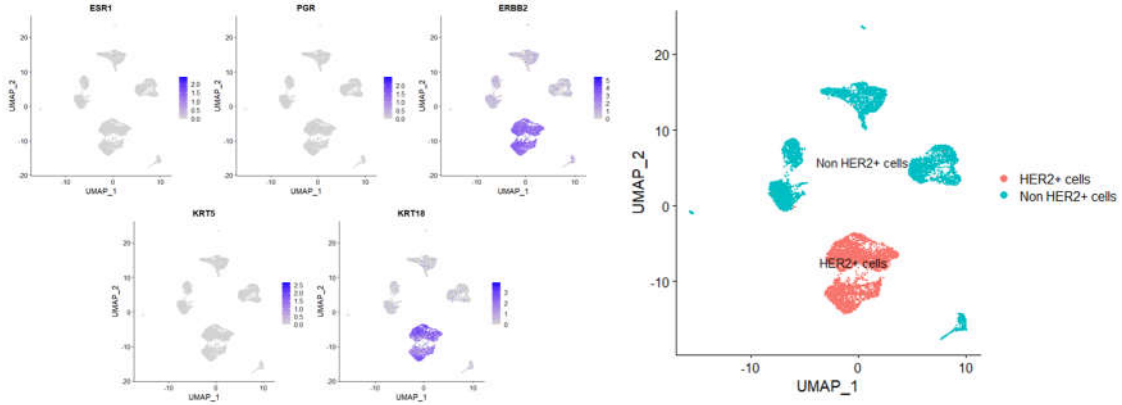**B**

GSM4909294 (HER2+)

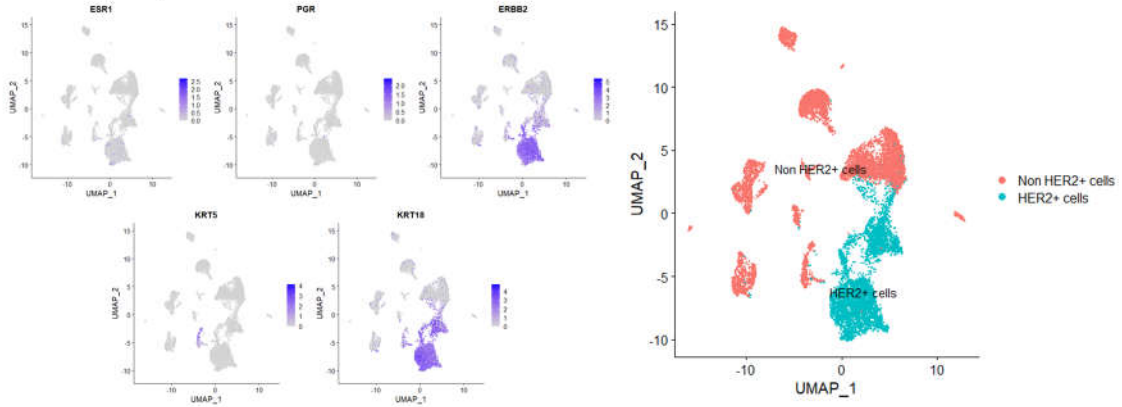**C**

GSM4909289 (HER2+)

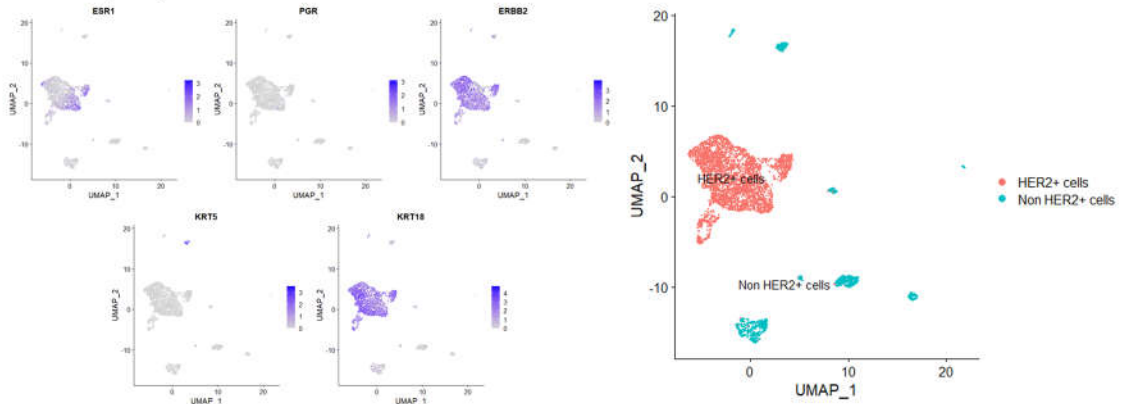

**Figure S2** Segmentation of HER<sup>+</sup> breast cancer cells from single cell data with patients.

**A**

GSM4909282 (TNBC)

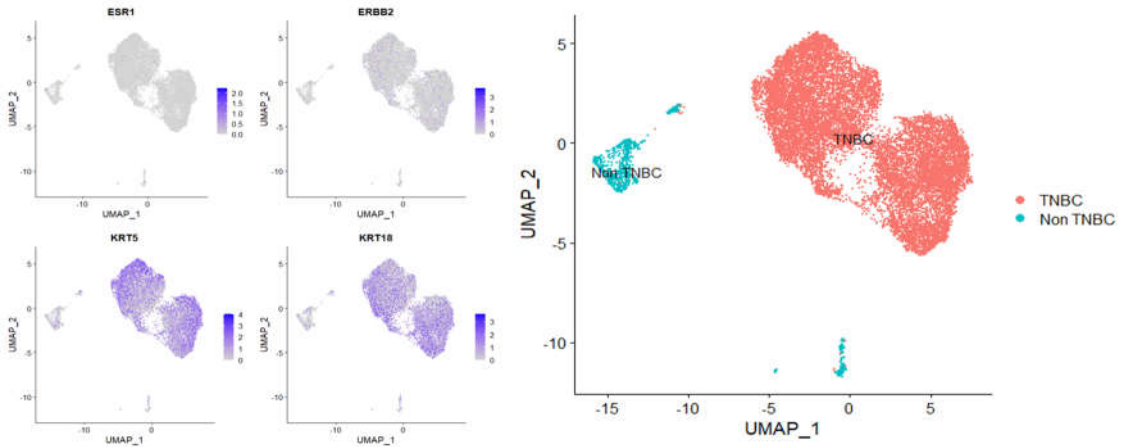**B**

GSM4909288 (TNBC)

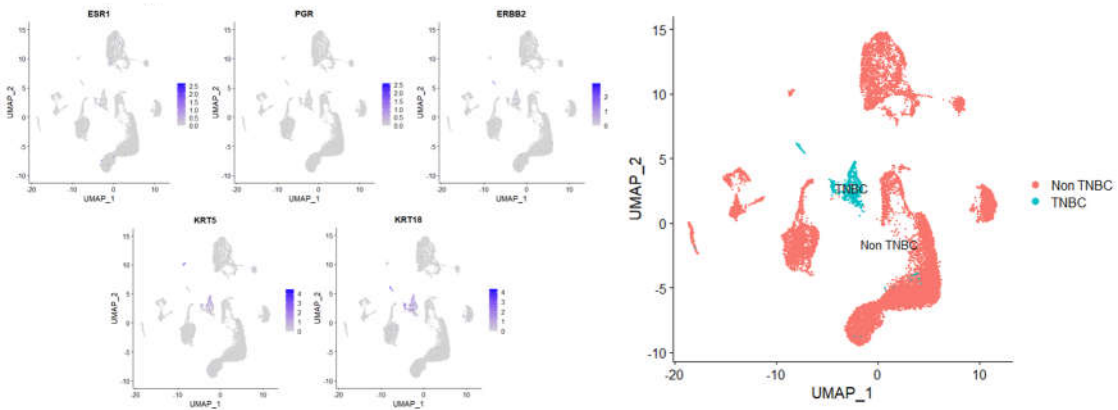**C**

GSM4909281 (TNBC)

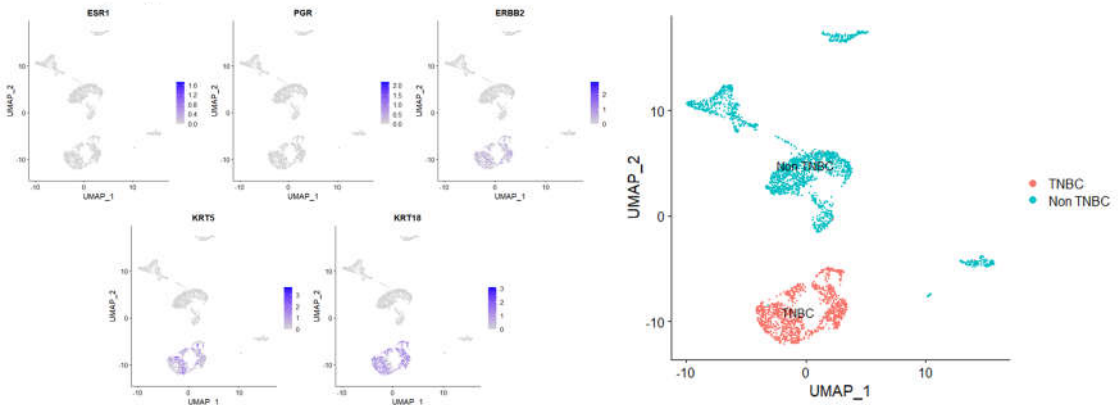**Figure S3** Segmentation of TN breast cancer cells from single cell data with patients.

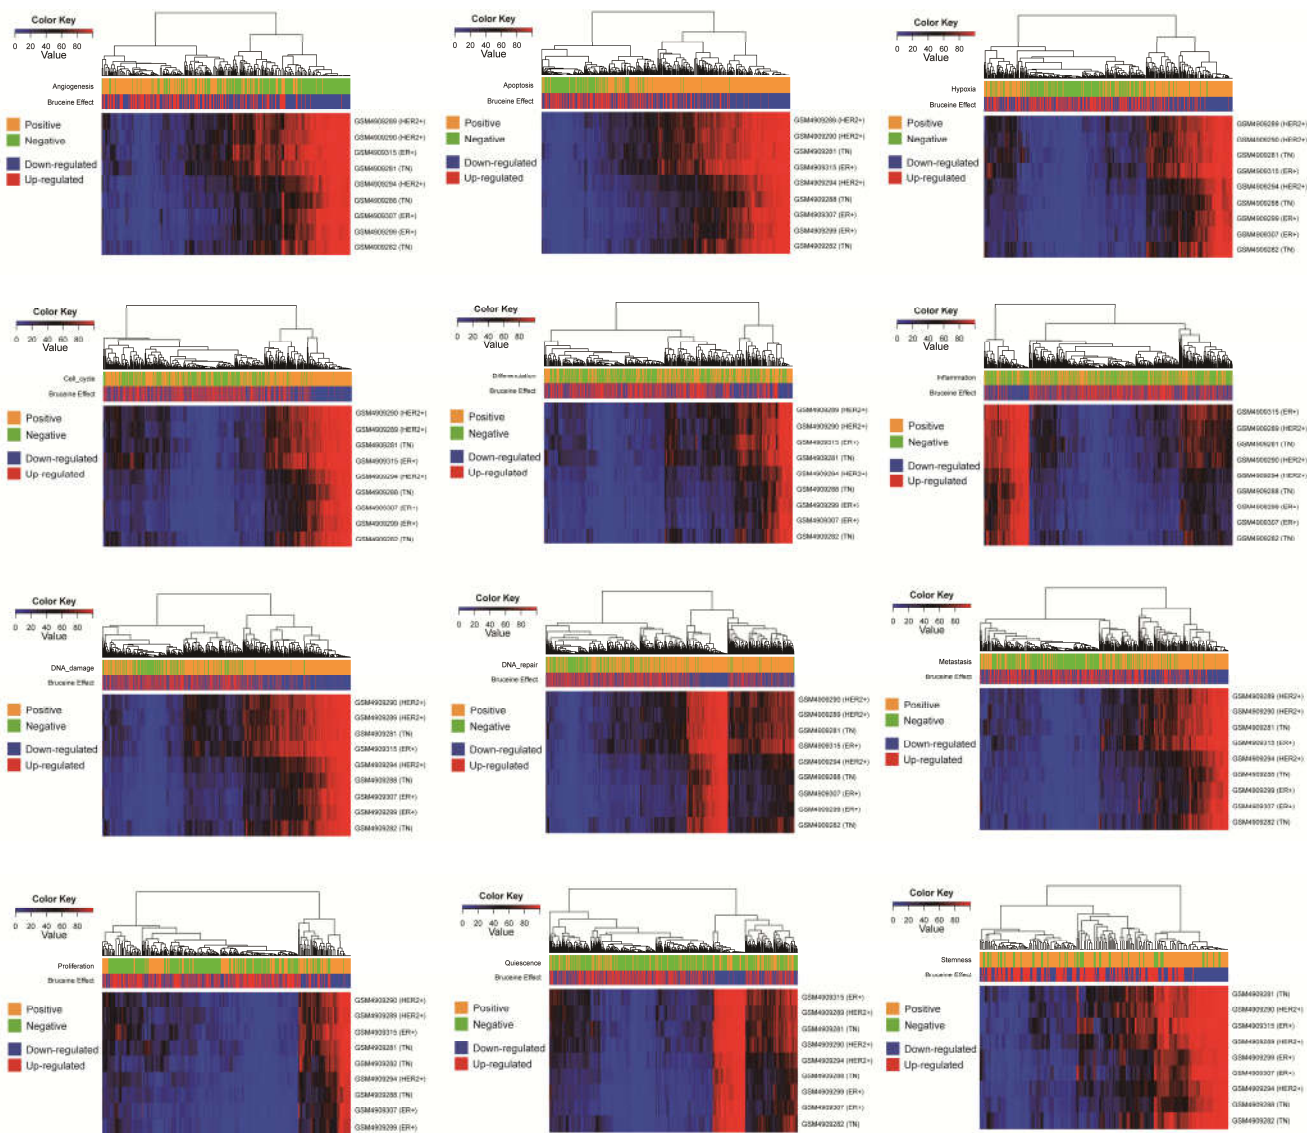

**Figure S4** Heatmap of proportion of positive cells within segmented tumor cells from scRNA-seq with 12 different functional states of cancer cells and gene expression status by BD treated or not.

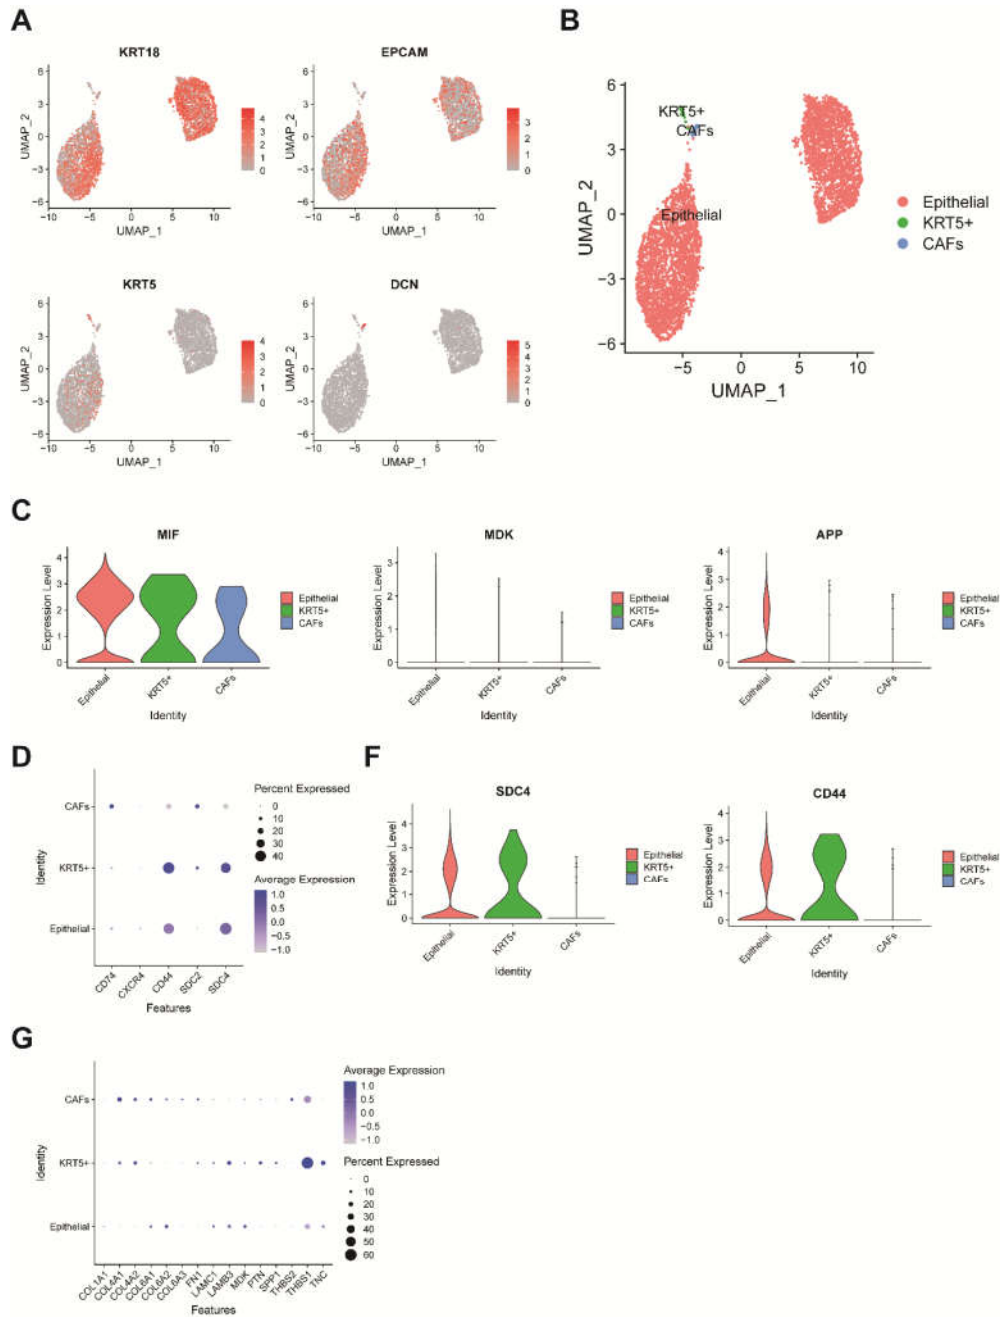

**Figure S5** Analysis of normal scRNA-seq data (GSM4909262) which is paired with GSM4909313 ER<sup>+</sup> BC. (A) Feature plot of the specific markers (KRT18: Luminal, EPCAM: Epithelial, KRT5: basal-like, and DCN: Fibroblast), (B) Feature plot with cluster of cell types according to the specific markers, (C) Violin plot of ligands which were expressed in ER<sup>+</sup> sample GSM (GSM4909313), (D) Dot plot with percent of positively expressed and average of expression of ligands which were expressed in ER<sup>+</sup> sample GSM (GSM4909313), (E) Violin plot of receptors which were expressed in ER<sup>+</sup> sample GSM (GSM4909313) and (G) Dot plot with percent of positively expressed and average of expression of receptors which were expressed in ER<sup>+</sup> sample GSM (GSM4909313).

**A**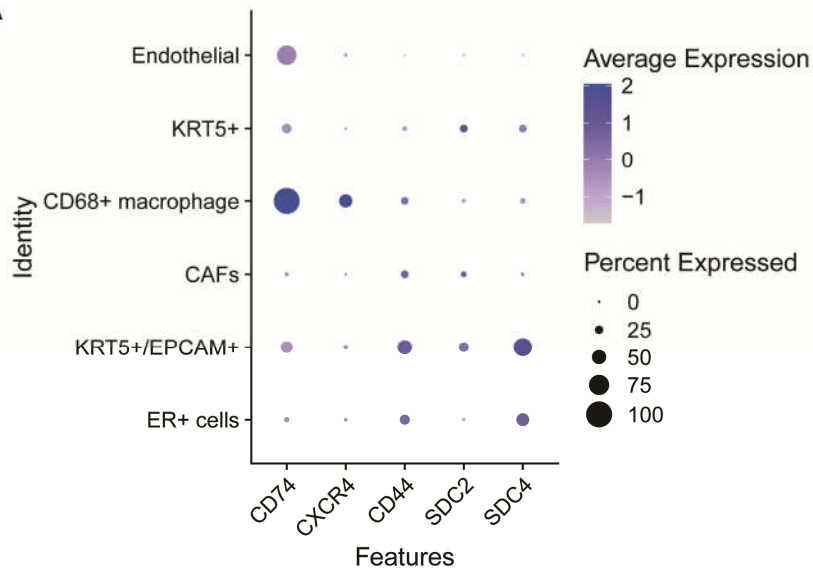**B**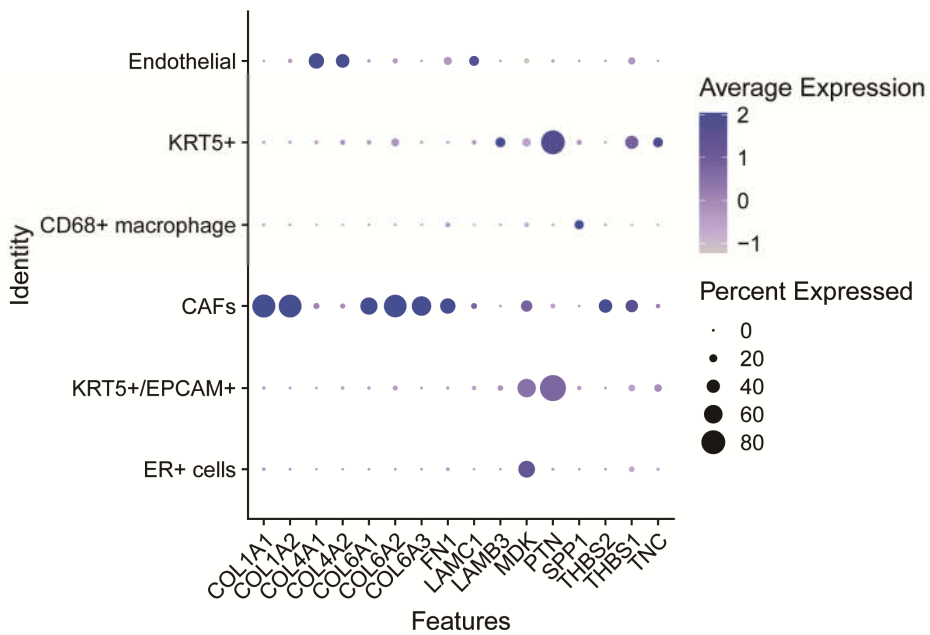

**Figure S6** Dot plots of expression of ligands receptor with percent of positively expressed and average of expression in ER<sup>+</sup> sample GSM (GSM4909313). (A) dot plot of significant ligands from cell-to-cell interaction analysis and (B) dot plot of significant receptors from cell-to-cell interaction analysis.
