# Supplementary material for: In Silico Evaluation of Natural Compounds for an Acidic Extracellular Environment in Human Breast Cancer
Source: Cells. 2021 Oct 6;10(10):2673. doi: 10.3390/cells10102673 (PMC8534855; doi:10.3390/cells10102673)
Supplement: Supplementary file 1 [file cells-10-02673-s001.zip › Table_S1.xlsx]

## Sheet: Sheet1
Table S1 Total genes for survival analysis with breast cancer patients from TCGA database
Gene	Hazard ratio	Confidence interval		P-value
		Low	High
PGK1	1.85106	1.46977	2.33127	1.67315e-07
PCNAP1	13.1479	4.73308	36.5231	7.7243e-07
PCMT1	1.92122	1.44602	2.55259	6.67077e-06
KRTAP19-1	9.08156	3.3938	24.3016	1.11719e-05
TFPI2	0.863383	0.80825	0.922277	1.28211e-05
MAP2K6	0.745199	0.652626	0.850903	1.38875e-05
KLRB1	0.834911	0.768305	0.907292	2.10406e-05
TNFRSF14	0.698781	0.592047	0.824757	2.25328e-05
IRF2	0.476345	0.3378	0.671712	2.34485e-05
CEL	1.1815	1.09242	1.27784	3.04421e-05
PELO	2.22444	1.50657	3.28438	5.78709e-05
SERPINA1	0.833568	0.762578	0.911167	6.11255e-05
LRP11	1.52779	1.24057	1.88151	6.63952e-05
TP53AIP1	0.791222	0.704819	0.888218	7.21526e-05
TCP1	1.67431	1.29706	2.16128	7.59599e-05
SAV1	0.613574	0.481111	0.782506	8.26902e-05
NUP43	1.80722	1.34566	2.4271	8.38675e-05
DLK2	0.816724	0.738229	0.903566	8.60482e-05
AGBL2	0.79155	0.704255	0.889665	8.82209e-05
STXBP5	1.51146	1.2293	1.85838	8.92277e-05
PIGR	0.907059	0.86383	0.952451	9.02785e-05
PARP3	0.701073	0.586861	0.837512	9.06411e-05
DEF6	0.698559	0.583023	0.836992	0.000100657
GALP	3.31292	1.80695	6.07402	0.00010756
ADAMTS8	0.835214	0.762117	0.915322	0.000116489
IFNK	2.25445	1.48869	3.41408	0.000123464
ZNF394	0.463805	0.312726	0.68787	0.000133147
SEMA3B	0.86512	0.803008	0.932036	0.000138089
GSTM4	0.728221	0.618568	0.857311	0.000139574
IL27RA	0.784335	0.691874	0.889153	0.000147194
CEBPD	0.774139	0.678155	0.883709	0.000150409
LHX5	1.39816	1.17523	1.66338	0.0001556
MORC4	1.49726	1.21402	1.84659	0.000161594
C1orf226	0.821915	0.742204	0.910188	0.000164577
NFKBIA	0.616369	0.478728	0.793583	0.000174687
RAC2	0.770767	0.672702	0.883129	0.000176859
SLC16A2	1.31314	1.13778	1.51553	0.000195333
APOBEC3D	0.787188	0.694004	0.892885	0.000197281
PTGES3	2.01564	1.3923	2.91804	0.000204635
BEND5	0.80681	0.72024	0.903785	0.000209865
TAPBPL	0.672913	0.545393	0.83025	0.000219645
CELP	1.24628	1.10878	1.40084	0.00022313
CCL19	0.907854	0.862268	0.95585	0.000235234
DERL1	1.59906	1.24494	2.05391	0.000237527
TEKT2	0.851892	0.781873	0.928181	0.000249189
LGALS2	0.857562	0.789844	0.931087	0.000250966
CYP27A1	0.782446	0.68597	0.892489	0.00025811
TMEM31	1.29881	1.12851	1.4948	0.000266402
PSMB8	0.751621	0.644645	0.876348	0.000267431
MAFA	1.44071	1.1835	1.7538	0.000273562
RBBP8	0.714581	0.595983	0.85678	0.00028418
CD79A	0.886306	0.83032	0.946066	0.000288585
FAM166B	0.811083	0.724009	0.90863	0.000301978
ZDHHC9	1.64515	1.25376	2.15871	0.000328875
SPDYC	1.10318	1.0454	1.16415	0.000346943
FREM1	0.861795	0.794257	0.935075	0.000354076
POU3F2	1.18456	1.07943	1.29992	0.000354218
ARMC1	1.53042	1.21133	1.93357	0.000361148
ADAM6	0.892382	0.838245	0.950016	0.000362779
HES3	5.51206	2.15675	14.0874	0.00036332
DCTPP1	1.62243	1.24335	2.11708	0.000364979
CD24	1.20176	1.08619	1.32963	0.000367215
PSME2	0.675401	0.54411	0.838373	0.000373023
NFE2	0.837903	0.760061	0.923719	0.000378044
DAPL1	0.855959	0.7856	0.932619	0.000379492
YIPF5	1.99154	1.3581	2.92044	0.000420193
MCTS1	2.04599	1.37385	3.04697	0.000426617
XRCC4	1.90744	1.33079	2.73394	0.000438286
BTBD6	0.573748	0.420857	0.782184	0.000441935
BIRC3	0.827033	0.743862	0.919503	0.000445007
APOOL	1.3705	1.14874	1.63507	0.000465732
MRPL13	1.46539	1.18254	1.81589	0.000478942
POP1	1.37771	1.1505	1.64978	0.000492752
EGOT	0.848163	0.773125	0.930485	0.000493196
MEI1	0.813606	0.724319	0.913899	0.000505137
AK7	0.833498	0.752111	0.923692	0.000512525
RAB2A	1.66688	1.24877	2.22498	0.000524883
TNIP1	0.590132	0.437963	0.795173	0.000527638
UTP23	1.45834	1.17813	1.80519	0.000528788
SEC63	1.51972	1.1991	1.92605	0.000536419
FUZ	0.778638	0.675762	0.897176	0.000538764
WNT3A	1.19944	1.0819	1.32976	0.000548434
UBA7	0.756256	0.645348	0.886224	0.000554958
KRTCAP3	0.862072	0.792258	0.938038	0.00057221
UBXN11	0.74129	0.625096	0.879083	0.000578387
HSPA9	1.72841	1.26499	2.3616	0.000590483
SLC20A2	1.42943	1.16579	1.75269	0.000593187
ADRB1	0.859598	0.788448	0.937169	0.000599054
LOC220729	1.5344	1.20125	1.95995	0.000607717
SUSD3	0.88535	0.825744	0.949259	0.000616376
HLA-DOB	0.855743	0.782686	0.935619	0.000622628
PAX7	1.09177	1.03807	1.14824	0.000644525
CLIC6	0.912506	0.865659	0.961887	0.00066152
PSME1	0.668083	0.529621	0.842743	0.000664497
C8orf33	1.45806	1.17344	1.81171	0.000665392
GPR171	0.851752	0.776511	0.934283	0.000672537
PXDNL	1.11969	1.04904	1.1951	0.000674325
CAMK4	0.805428	0.710955	0.912454	0.000675804
CLEC9A	0.826948	0.741062	0.922789	0.000683329
RPL27A	0.672343	0.534552	0.845651	0.000692037
TSLP	0.83403	0.75093	0.926325	0.000701262
MRAP2	0.860908	0.789385	0.938912	0.000713464
SURF4	1.85495	1.29636	2.65423	0.000725307
PEX10	0.610606	0.458681	0.81285	0.00072618
DTHD1	0.806779	0.712243	0.913863	0.00073417
SIPA1L1	0.610142	0.457963	0.812889	0.000737684
NTRK3	0.886496	0.826568	0.950768	0.000741831
ZNF385B	0.892035	0.834589	0.953434	0.000768207
SI	2.19623	1.38865	3.47345	0.00076884
RPS18	0.673948	0.535419	0.848319	0.000776291
RPL14	0.671662	0.532507	0.847183	0.000779353
OR5T3	21.641	3.59878	130.136	0.000782159
DACT2	0.836051	0.753078	0.928167	0.000785669
TTC39C	0.707098	0.577418	0.865903	0.000799892
LOC100129534	0.797363	0.698412	0.910333	0.000809296
HCCS	1.74923	1.26071	2.42704	0.000818516
RPL11	0.672605	0.5327	0.849253	0.000858294
OCRL	1.60594	1.21543	2.12193	0.000861008
ZIC2	1.10259	1.04098	1.16784	0.000871682
PLXNB1	0.702371	0.570228	0.865136	0.000892925
CYP24A1	0.868571	0.79927	0.943881	0.000895906
SIAH2	0.759912	0.646104	0.893767	0.000910778
TBP	1.81515	1.27601	2.58208	0.000914998
LEF1	0.803492	0.705983	0.914468	0.000918061
TMIGD2	0.797036	0.696643	0.911896	0.000957591
TAPBP	0.645776	0.498154	0.837145	0.000958883
SNTN	0.846592	0.766885	0.934582	0.000963427
GBP2	0.786174	0.681481	0.90695	0.000968757
SFTPD	0.820469	0.729215	0.923143	0.00100435
APOBEC3F	0.774197	0.664442	0.90208	0.0010339
OR13C8	393.26	11.0288	14022.7	0.00105137
PAPLN	0.807979	0.711188	0.917942	0.00105614
MAK	0.841214	0.758445	0.933015	0.00106795
LCE3D	1.31637	1.1165	1.55203	0.00106976
CHMP4A	0.661593	0.516539	0.84738	0.00107012
HSP90AA1	1.45205	1.16126	1.81567	0.00107115
FLT3	0.893245	0.83482	0.955759	0.00107151
ATG4A	1.7216	1.24298	2.38452	0.00108041
MS4A1	0.904206	0.851216	0.960495	0.00108279
KRTAP12-1	3.38622	1.62903	7.03884	0.00108674
MORN3	0.822193	0.730924	0.924859	0.0011098
MTFR1	1.35421	1.12854	1.62501	0.00111392
HSPA8	1.51919	1.18141	1.95354	0.00111678
GZMM	0.862439	0.788939	0.942786	0.00112862
YWHAB	1.80187	1.26333	2.56998	0.00115303
BCL2L14	0.863859	0.790682	0.943808	0.00119301
FABP7	0.919223	0.873536	0.967299	0.00120286
GPR107	1.65345	1.21938	2.24203	0.00120997
COL17A1	0.915134	0.867251	0.96566	0.00121924
PPP2R2B	0.829754	0.741006	0.929132	0.00122271
RPL31	0.685197	0.544814	0.861754	0.0012296
GLI1	0.845751	0.76403	0.936213	0.00123245
CLCA4	0.839445	0.754856	0.933514	0.00123998
HBS1L	1.57232	1.19463	2.06941	0.00124328
CLEC3A	1.04973	1.01925	1.08112	0.00124378
KRT5	0.933037	0.894585	0.973142	0.00124706
MEOX1	0.886441	0.823864	0.953772	0.00125052
OR7C1	0.709017	0.575194	0.873974	0.00127229
PRRC1	1.75985	1.24782	2.48199	0.00127293
SLC35A2	1.62272	1.2087	2.17855	0.0012765
RELB	0.753233	0.633864	0.895082	0.00128619
LCN1	1.51711	1.17674	1.95593	0.00130214
ME3	0.797935	0.695201	0.91585	0.00132743
SATL1	1.57262	1.19263	2.0737	0.00133543
RHBDL1	0.862522	0.787952	0.944149	0.00134743
SVOPL	0.871109	0.800584	0.947846	0.00135792
WWOX	1.25767	1.09301	1.44713	0.00136392
SCML4	0.86574	0.792578	0.945656	0.00137271
CARNS1	0.776399	0.664876	0.906627	0.00137932
OR7A5	0.782109	0.672742	0.909256	0.00138509
P4HA2	1.45351	1.15571	1.82805	0.00138817
C1RL	0.695877	0.557111	0.869207	0.00139717
MIA	0.909928	0.858736	0.964171	0.00139844
QPRT	1.18439	1.06754	1.31403	0.00140727
CD52	0.849582	0.768688	0.938989	0.00140772
KCNK9	1.18469	1.06763	1.31458	0.00140866
SERPINA3	0.897068	0.839192	0.958937	0.00141192
CASP9	0.591051	0.427838	0.816526	0.00142604
ABCC2	1.14495	1.05341	1.24445	0.00145377
TBC1D10C	0.853104	0.773591	0.940789	0.00145904
PDP1	1.33337	1.11665	1.59217	0.00147753
ALDH3A1	0.848685	0.766883	0.939213	0.00151031
EIF4E3	0.729293	0.600045	0.886382	0.00151526
TNFRSF13B	0.861004	0.784946	0.944432	0.00151613
SLAIN1	0.882168	0.816376	0.953262	0.00152242
FOXQ1	0.861573	0.785662	0.94482	0.00154484
NXNL2	0.885971	0.82199	0.954932	0.00154667
OR52E6	1.38215	1.13114	1.68886	0.00155053
DAXX	0.560195	0.391268	0.802053	0.00155302
IGSF1	0.910519	0.859146	0.964965	0.00155877
GPR18	0.824829	0.732015	0.929411	0.00156757
EDA2R	1.24886	1.08807	1.43341	0.00157583
CCNA1	0.847772	0.765215	0.939235	0.00158196
TMEM164	0.761647	0.643267	0.901814	0.00158281
SPAG8	0.814122	0.716391	0.925185	0.00162301
DLG3	1.69556	1.22098	2.35462	0.00162352
IL12B	0.83228	0.74238	0.933066	0.00164477
TNFRSF18	0.860896	0.784233	0.945054	0.00164644
VDAC1	1.66525	1.21202	2.28795	0.00165351
ROPN1L	0.86367	0.788272	0.94628	0.00166265
MTDH	1.44637	1.14869	1.82119	0.00169528
TP63	0.895433	0.835731	0.959399	0.00170513
TNN	0.889502	0.826753	0.957014	0.00170611
SDR39U1	0.656373	0.50447	0.854016	0.00171856
JAK2	0.737889	0.610125	0.892408	0.00172789
S100B	0.893902	0.833297	0.958913	0.00174071
MBLAC1	0.757626	0.636734	0.901472	0.00175144
TPT1	0.692636	0.550185	0.871971	0.00177114
CTSW	0.877547	0.808524	0.952463	0.00177672
ALOX15	1.1136	1.04082	1.19148	0.00180912
CDHR4	0.845044	0.760205	0.939351	0.00181466
VTA1	1.58185	1.18462	2.11228	0.00188171
LTA4H	0.57871	0.409857	0.817127	0.00188782
SMR3A	1.21007	1.0729	1.36478	0.00189426
ZNF219	0.79693	0.690475	0.919798	0.00191764
SCARB2	1.54868	1.17479	2.04156	0.00191824
MED17	1.66693	1.20698	2.30216	0.00192236
RPS9	0.732427	0.601594	0.891712	0.00192525
RBMY2FP	2.15138	1.32557	3.49166	0.00193099
SLC7A3	0.86526	0.789533	0.94825	0.00195439
TMEM151B	0.755833	0.63307	0.902401	0.00196406
PLAC8	0.87431	0.802924	0.952043	0.00199588
PLA2G2D	0.902519	0.845683	0.963175	0.0019979
LAT	0.828418	0.735184	0.933475	0.00200144
CCDC57	0.737947	0.608496	0.894937	0.00201571
PCYT1A	1.52942	1.16785	2.00294	0.00201894
RPL5	0.677671	0.529342	0.867563	0.00202079
GGNBP1	1.57016	1.17903	2.09104	0.00202395
FAM111A	0.700654	0.558797	0.878522	0.00205594
CST7	0.855451	0.774457	0.944915	0.00209483
C17orf99	0.647026	0.490192	0.85404	0.00211228
PWRN1	1.75507	1.22605	2.51235	0.00211564
SPIB	0.897504	0.837695	0.961584	0.00211717
EPB41L4B	1.29495	1.09805	1.52716	0.00212978
PLCD1	0.709974	0.570477	0.883582	0.00214841
CBR1	0.81341	0.712889	0.928106	0.00215112
GP1BA	0.843524	0.756645	0.940379	0.00215187
ZP1	1.16635	1.05712	1.28687	0.00216084
CGB8	1.51215	1.16099	1.96952	0.00216153
MRGPRX1	17.2957	2.79704	106.95	0.00216601
HNRNPA1L2	0.565947	0.393257	0.814469	0.00217771
SLC22A11	0.774684	0.65783	0.912294	0.00221128
PLA2G1B	0.683132	0.535171	0.871999	0.00221545
TOX	0.870049	0.795822	0.951199	0.00221617
TMEM60	0.60099	0.433657	0.83289	0.00222657
PDSS2	1.40868	1.13085	1.75475	0.00223467
OSR1	0.894747	0.833169	0.960876	0.00223594
RPLP1	0.712405	0.57317	0.885464	0.00224075
SLC7A4	0.914151	0.862964	0.968376	0.00226577
NFKB2	0.718464	0.580938	0.888545	0.0022881
CPT1A	1.30827	1.10076	1.55491	0.00229301
IGF2R	1.43946	1.13893	1.8193	0.00229839
UBE2A	1.7726	1.22659	2.56168	0.00231078
ZNF155	0.720477	0.583482	0.889637	0.00231337
DIP2B	1.52858	1.16325	2.00865	0.00232603
KLRK1	0.866849	0.790626	0.95042	0.0023436
MAL2	1.28083	1.09205	1.50223	0.00234704
MAGT1	1.61109	1.18478	2.19079	0.00235603
DEFB103B	1.38156	1.12141	1.70205	0.00239366
C6orf141	0.889068	0.824047	0.95922	0.00240984
TCN1	0.924375	0.878582	0.972555	0.00241766
KCNE1	0.868865	0.793388	0.951522	0.00243164
CD8A	0.861556	0.782419	0.948698	0.0024351
TUBA3D	0.910183	0.85644	0.967298	0.00244004
ADAM9	1.24021	1.07902	1.42548	0.00244094
NUDT14	0.745641	0.616698	0.901545	0.00244644
KLRC3	0.845895	0.759027	0.942705	0.00246857
YIPF6	1.4227	1.13207	1.78792	0.00249445
PTPN18	0.625047	0.460929	0.847601	0.00249503
CCDC28B	0.792988	0.682277	0.921664	0.00250113
CD27	0.876798	0.805135	0.954838	0.00250909
OR51F1	65.417	4.34144	985.707	0.00252099
TECTA	1.27523	1.08879	1.4936	0.00257194
CD3D	0.884519	0.816671	0.958003	0.00258141
NFKBIE	0.721325	0.583227	0.892123	0.00258886
MRO	1.25157	1.08154	1.44834	0.00259421
RSPH4A	0.83618	0.74422	0.939505	0.00261478
CXCL1	0.886616	0.819778	0.958904	0.00261821
RPS29	0.677809	0.526132	0.873211	0.00262131
TNFRSF17	0.890919	0.826351	0.960533	0.00262146
ADHFE1	0.830912	0.736452	0.937486	0.00262642
ARID5A	0.793674	0.68268	0.922713	0.00264288
STIP1	1.48336	1.14703	1.9183	0.00265073
CXCL13	0.921822	0.874136	0.97211	0.00266704
ARHGEF1	0.709124	0.56645	0.887733	0.00270904
STX11	0.794094	0.682853	0.923456	0.00275243
RPPH1	0.835373	0.742471	0.9399	0.00278613
RPS8	0.713898	0.572342	0.890463	0.00280044
HYI	0.769654	0.648183	0.913888	0.00281313
TRIM45	0.777244	0.65875	0.917051	0.0028265
REPS1	1.55073	1.16259	2.06846	0.00283656
ZNF674	1.56622	1.16619	2.10348	0.00286684
SLC6A3	1.17676	1.05735	1.30965	0.00286805
TOR1B	1.67671	1.19359	2.35539	0.00287806
SDAD1	1.62965	1.18196	2.24692	0.00288191
APOA5	1.2743	1.08635	1.49477	0.00290797
OSGEP	0.643977	0.48185	0.860655	0.00293896
TRAF1	0.800699	0.69158	0.927034	0.00294374
TULP4	1.47894	1.14259	1.91431	0.00295411
RAPGEFL1	0.841607	0.751111	0.943007	0.0029685
CD40LG	0.876768	0.803898	0.956243	0.00297186
CD74	0.814838	0.71183	0.932753	0.00298256
POU2AF1	0.901264	0.841494	0.965279	0.00298442
BTG2	0.834072	0.73986	0.940281	0.0030085
SLC30A5	1.62872	1.17982	2.2484	0.00302514
SRXN1	1.41945	1.12606	1.78927	0.0030269
UBXN1	0.732303	0.595967	0.899826	0.0030347
STOX1	0.851552	0.7657	0.947031	0.00303956
ARHGAP26	0.79568	0.684032	0.925553	0.00304796
IYD	1.09854	1.0323	1.16902	0.00305812
TPRXL	1.12292	1.03996	1.21251	0.00307255
TAS2R30	0.414095	0.230924	0.742558	0.0030873
IP6K2	0.616932	0.447939	0.849682	0.00310302
RPL29	0.733587	0.597249	0.901047	0.0031448
KRT17	0.933154	0.891276	0.977	0.00314528
IGFALS	0.899394	0.838267	0.964978	0.00315025
TRMT2B	1.55228	1.15929	2.07848	0.00315353
TPRG1	0.915755	0.863783	0.970853	0.00315483
NUDCD1	1.34917	1.10589	1.64597	0.00315621
NCBP1	1.61986	1.17598	2.2313	0.0031566
MORF4L2	1.42839	1.12726	1.80996	0.00316062
FAM120B	1.56978	1.16357	2.11779	0.00316156
CPSF4	0.612942	0.442844	0.848375	0.00316295
MITD1	0.606775	0.435397	0.845611	0.00317509
HCG27	0.798415	0.687448	0.927294	0.00319184
S1PR4	0.860989	0.779445	0.951064	0.00319533
PHKB	1.38176	1.11446	1.71317	0.00319911
OR13C5	2.90877	1.42965	5.91821	0.00321675
HSD11B1	0.859668	0.777359	0.950692	0.00323277
PRKCZ	0.728612	0.590154	0.899553	0.00323585
ASB2	0.838335	0.745424	0.942828	0.00325819
NPY1R	0.929391	0.885143	0.975851	0.00325952
GFI1	0.851384	0.764811	0.947757	0.00327486
CLCNKB	0.785186	0.668275	0.92255	0.00328223
HCST	0.830811	0.734197	0.940138	0.00329685
XRCC1	0.641036	0.476494	0.862395	0.00330185
VSIG8	1.23065	1.07151	1.41343	0.0033073
PLEKHA4	0.835965	0.741747	0.942151	0.00331746
ZMYND15	0.803988	0.695014	0.930047	0.00332654
MYBPH	0.805581	0.697275	0.930709	0.00333813
CACNA1H	1.11228	1.03596	1.19422	0.0033459
RBM15B	0.547157	0.36562	0.818832	0.00337105
TTC24	0.792116	0.677832	0.925668	0.00337242
ULBP2	1.16016	1.05034	1.28146	0.00341187
CCL5	0.868935	0.790923	0.954642	0.00342094
DSTN	1.51657	1.14733	2.00465	0.00344053
CD1B	0.864694	0.784431	0.95317	0.00344528
RPH3A	1.17454	1.05442	1.30833	0.00346939
REEP2	0.850315	0.762701	0.947995	0.0034717
INPP5A	1.55551	1.15655	2.09208	0.00347936
TBC1D24	1.35811	1.10597	1.66773	0.00348644
PARP12	0.715433	0.571411	0.895755	0.00350166
FAM117A	0.747099	0.61421	0.90874	0.00352756
ERRFI1	0.782352	0.663389	0.922649	0.00353882
MYBPC1	0.934324	0.89263	0.977966	0.00353976
STAC2	0.936054	0.89539	0.978564	0.00354319
COX6B2	0.867852	0.788977	0.954613	0.00355215
CS	1.72544	1.19539	2.49052	0.00357869
POLR3GL	0.685339	0.531482	0.883736	0.00358241
APOBEC3G	0.834085	0.73823	0.942386	0.00358361
C8orf76	1.39119	1.114	1.73735	0.00358865
CCDC92	0.639637	0.473407	0.864236	0.00361165
GSTK1	0.694923	0.543682	0.888236	0.00365606
CYP4F11	0.913696	0.859715	0.971066	0.00367323
CCDC74B	0.893544	0.828194	0.96405	0.00367475
IL18RAP	0.853134	0.766401	0.949684	0.00368715
RILPL2	0.743031	0.608019	0.908023	0.0036961
CD6	0.868	0.788874	0.955062	0.00369882
TRAT1	0.884276	0.813795	0.96086	0.00370663
ZNF345	0.694723	0.543148	0.888599	0.00372593
PTPRCAP	0.8733	0.796886	0.957043	0.00373429
IFNG	0.858639	0.774558	0.951848	0.00374926
SORBS1	0.816557	0.711958	0.936524	0.00375983
CALML3	0.926957	0.880579	0.975777	0.00377577
SCFD2	1.68895	1.18448	2.40827	0.00378928
ARID1B	1.61348	1.16697	2.23084	0.00380301
SAA1	0.914021	0.860024	0.971409	0.00380807
SNX9	1.62408	1.16924	2.25586	0.00382095
CCDC97	0.566109	0.384965	0.832491	0.00383114
PCYT2	0.711332	0.564688	0.896059	0.00383174
WNT1	0.753849	0.622384	0.913084	0.00385322
OR5H1	24.7912	2.80817	218.864	0.00386287
RPL3	0.727416	0.586149	0.90273	0.00386672
HLA-DQB2	0.880166	0.807083	0.959867	0.00390044
ZNF18	0.66311	0.501673	0.876498	0.00390144
NFIA	0.831804	0.733995	0.942647	0.0039096
DCAF13	1.34992	1.10093	1.65522	0.00392224
PCSK6	0.882444	0.810543	0.960723	0.00392659
ACAP1	0.877466	0.802874	0.958987	0.00392829
LTB	0.898559	0.835537	0.966334	0.00393921
ZDHHC8	0.748024	0.613988	0.91132	0.00395547
RBMY1J	1.84123	1.21529	2.78955	0.00397864
C1orf194	0.858276	0.773484	0.952364	0.00398178
SPINK8	1.1006	1.03108	1.1748	0.00398255
RGS3	1.51724	1.14186	2.01602	0.00404404
ETFA	1.37843	1.10752	1.71562	0.00404435
SARM1	0.830465	0.731656	0.942619	0.00404972
SYNJ2	1.38621	1.10944	1.73203	0.00405401
ZSCAN21	0.570763	0.389325	0.836758	0.00406552
NAB2	0.730789	0.589909	0.905313	0.00410014
ZP2	1.14627	1.04416	1.25838	0.00413604
TUBA3E	0.911124	0.854964	0.970972	0.0041375
ENPP6	0.833961	0.736599	0.944191	0.00414881
POLR2B	1.59069	1.15804	2.18499	0.00415835
GZMA	0.88302	0.810962	0.961481	0.00417867
STX7	1.62514	1.16559	2.26587	0.00418893
ANKRD52	1.50167	1.13687	1.98353	0.0041917
LOC100128164	0.740198	0.60244	0.909458	0.00419321
RILP	0.788602	0.67023	0.92788	0.00420958
SFTPB	0.796515	0.681585	0.930823	0.00421461
ELOVL2	0.923504	0.874513	0.975239	0.0042161
IL17B	0.864696	0.78268	0.955305	0.00424625
PAICS	1.47083	1.12902	1.91613	0.00424699
PSMB10	0.781178	0.659475	0.925342	0.00426441
EEF1B2	0.670949	0.510308	0.882159	0.00426462
DIRAS3	0.870842	0.792039	0.957484	0.00426689
FAM181A	0.632502	0.461932	0.866055	0.00427887
NR1H3	0.72722	0.5843	0.905098	0.00432938
RGL4	0.837881	0.74195	0.946216	0.00435693
C20orf85	0.867674	0.786984	0.956637	0.00437001
ERF	0.715247	0.56801	0.90065	0.00437517
GZMK	0.899554	0.836382	0.967499	0.00438102
PNO1	1.65385	1.16988	2.33804	0.00439677
CD1C	0.893152	0.826314	0.965397	0.00440875
OR6C4	3.13286	1.42712	6.87737	0.00442031
MAFF	0.781781	0.659854	0.926237	0.00443137
LHX1	1.11708	1.03504	1.20561	0.00444115
CCL27	0.542829	0.35625	0.827125	0.00446578
OPN4	1.28974	1.08218	1.5371	0.00448012
PDCD4	0.809773	0.700083	0.93665	0.00449418
TMED7-TICAM2	1.16879	1.04944	1.30172	0.00453856
CD160	0.758459	0.626633	0.918018	0.00453892
LRP1B	0.912105	0.855952	0.971941	0.00454163
FGFBP1	0.898161	0.83394	0.967328	0.0045462
PIM2	0.782248	0.660129	0.926957	0.00457113
DLEC1	0.837576	0.740979	0.946765	0.00458348
FOXJ1	0.920348	0.868943	0.974795	0.00464744
GOSR2	1.60537	1.15668	2.22812	0.00465121
STAP1	0.870895	0.791391	0.958386	0.00465176
TMEM14B	0.639433	0.469088	0.871637	0.0046673
KCNIP1	0.818466	0.712395	0.940332	0.00467365
MATK	0.879911	0.805265	0.961475	0.00467567
APC2	1.17631	1.05106	1.3165	0.00470122
SCARNA2	0.796795	0.680593	0.932837	0.00473682
STAT4	0.872274	0.793333	0.95907	0.00475117
C1orf53	0.814227	0.705969	0.939086	0.0047522
BTN2A2	0.719426	0.572362	0.904277	0.0047674
OTUD6B	1.31378	1.08689	1.58802	0.00478158
PCDHGA11	1.1861	1.05349	1.3354	0.00478277
FCRL5	0.909195	0.850967	0.971408	0.0048172
HINT3	1.43253	1.11574	1.83928	0.0048207
CCL1	0.560805	0.375099	0.83845	0.00482273
SNX3	1.48785	1.12867	1.96133	0.00482303
TMEM229B	0.826634	0.724109	0.943674	0.00483166
TEKT1	0.85212	0.762352	0.952458	0.00483889
CNGA4	0.797707	0.681639	0.933539	0.00484466
FGF19	0.809595	0.698942	0.937767	0.00484951
DMAP1	0.664098	0.499437	0.883046	0.00487057
RBM45	2.2605	1.28121	3.98832	0.00487194
ZRSR2	0.655188	0.488105	0.879464	0.00487626
ESR2	0.773404	0.646698	0.924935	0.00488153
PSPC1	0.601234	0.421847	0.856902	0.00489024
PRKAB2	1.41748	1.11168	1.80739	0.00489431
SHCBP1	1.21357	1.06047	1.38876	0.00490278
PARD6A	0.784155	0.661925	0.928957	0.00491861
PCDHA8	1.15751	1.04531	1.28175	0.00492659
ARFGEF1	1.33439	1.09122	1.63175	0.00494655
RNF139	1.40323	1.10767	1.77767	0.00499569
DNAJB5	0.740827	0.600742	0.913578	0.00502924
HLA-J	0.829342	0.727689	0.945196	0.00503481
KRT14	0.942003	0.903481	0.982168	0.00503836
SLC25A32	1.42013	1.11135	1.8147	0.0050481
ABCD2	0.871176	0.791104	0.959354	0.00505532
GNL3L	1.51708	1.13361	2.03028	0.00505558
PGM3	1.37482	1.10032	1.71779	0.00508972
CCND2	0.803489	0.689386	0.936477	0.00511322
AHRR	1.1942	1.05466	1.35221	0.00512012
THAP8	0.674993	0.512545	0.888927	0.00513951
FAM181B	0.875728	0.797983	0.961047	0.00514842
ZNF623	1.33746	1.09081	1.63988	0.0051791
KIF5B	1.50482	1.12985	2.00424	0.00519161
CHTF8	1.73419	1.17862	2.55164	0.00520537
ABCA10	0.870556	0.789841	0.959519	0.00523268
LIMD2	0.829293	0.72717	0.945757	0.00524242
RPL4	0.683898	0.523739	0.893032	0.00525437
PROX2	0.6984	0.542772	0.898651	0.0052587
RPL36	0.765986	0.63513	0.923803	0.00528427
SLC25A29	0.77853	0.652849	0.928407	0.00532117
LRRFIP2	0.68773	0.528096	0.895619	0.00546887
PVRIG	0.830769	0.728899	0.946877	0.00547273
TLR10	0.869008	0.787023	0.959534	0.00548675
MYL5	0.786246	0.663478	0.931732	0.00549845
ODF3L2	1.25641	1.06941	1.47611	0.0055
PLEKHO1	0.77844	0.65223	0.929073	0.00551889
RPL38	0.716591	0.566255	0.906841	0.00553807
IRF1	0.793541	0.673902	0.934418	0.00554586
GZMH	0.882007	0.807118	0.963845	0.00554745
ANKK1	0.843803	0.748353	0.951428	0.00555585
GPR132	0.826492	0.722298	0.945715	0.00557501
SPINT1	1.44094	1.11282	1.8658	0.00559203
BTG1	0.729839	0.584047	0.912023	0.00560682
GPR55	0.87119	0.790154	0.960535	0.00563529
SERPINA12	0.851326	0.759523	0.954224	0.00569538
SOCS3	0.816116	0.706625	0.942572	0.00569847
RUNX1	0.763248	0.630137	0.924476	0.00572599
SLC16A8	0.827119	0.722905	0.946357	0.00573798
TMEM167A	1.64582	1.15557	2.34406	0.00575633
NEK10	0.924378	0.87418	0.977458	0.00577447
COPS5	1.46144	1.11614	1.91357	0.00579982
OR7D2	0.824966	0.719547	0.945829	0.0058093
PSTPIP1	0.872816	0.792365	0.961436	0.00583251
NDRG2	0.839325	0.741045	0.95064	0.00584023
ACBD5	1.41132	1.10445	1.80346	0.00588484
OSBPL1A	0.759189	0.624002	0.923664	0.00589396
STEAP2	0.869333	0.786862	0.960448	0.005896
SEC24A	1.39855	1.10146	1.77576	0.00590323
CASP7	0.728726	0.581723	0.912878	0.00590651
CLEC10A	0.906123	0.844688	0.972027	0.00592317
IL18BP	0.786537	0.662862	0.933287	0.00594182
CCDC24	0.806559	0.691992	0.940094	0.00595445
KCNH3	0.862998	0.776973	0.958547	0.00595625
MST1	0.853579	0.762497	0.955541	0.00596171
RPS6KA1	0.718669	0.567833	0.909572	0.00598606
PMAIP1	0.851132	0.758668	0.954864	0.00601239
ICAM3	0.758786	0.623081	0.924047	0.00603828
ATP6V1H	1.4151	1.10445	1.81312	0.00604006
BNC1	0.876248	0.797377	0.96292	0.00604878
OR56B4	1.43428	1.10865	1.85554	0.00605081
WT1	1.08995	1.02493	1.1591	0.00606094
CAMSAP1	1.53907	1.13114	2.0941	0.00606462
PHF20	1.52286	1.12767	2.05655	0.0060736
ITK	0.895753	0.827998	0.969052	0.00608196
WDR17	0.900817	0.836013	0.970644	0.00610354
SH3BP1	0.76602	0.633116	0.926824	0.00611434
FCRLA	0.891813	0.821714	0.967892	0.00611958
KLRC1	0.862719	0.776222	0.958855	0.00615507
WNT10A	0.866835	0.782578	0.960163	0.00615971
KRT15	0.922179	0.870235	0.977224	0.00616599
CLDN19	0.890552	0.819657	0.967579	0.00616935
COPS4	1.68586	1.16007	2.44998	0.00617249
PCDHB2	1.13621	1.03696	1.24495	0.00617773
CABYR	0.821544	0.713662	0.945735	0.00620507
LY9	0.888327	0.816087	0.966962	0.00621381
PFDN5	0.690197	0.529099	0.900344	0.00625605
CITED4	0.891194	0.820546	0.967926	0.00626516
GZMB	0.903678	0.840365	0.971761	0.006278
PTMA	0.659878	0.489665	0.88926	0.00631382
IFNE	0.763822	0.62951	0.92679	0.00632424
PLEKHH1	0.820263	0.711472	0.945689	0.00634966
UBTF	0.557062	0.365898	0.848102	0.00636785
HSPA2	0.873968	0.793351	0.962777	0.00636799
ACTL8	1.07125	1.01956	1.12555	0.00637727
GRHPR	0.630626	0.452714	0.878456	0.00640564
CD19	0.906785	0.845149	0.972917	0.00644099
PCGF5	0.712497	0.558301	0.90928	0.00644439
PHAX	1.59257	1.13894	2.22688	0.00651792
TMEM156	0.871453	0.78921	0.962266	0.00651857
RPS11	0.712567	0.558205	0.909614	0.0065188
GSTM2	0.887108	0.813729	0.967104	0.00654235
TANK	0.670632	0.502813	0.894464	0.00654851
SH2D2A	0.871686	0.789528	0.962394	0.00655037
RPL13	0.766205	0.632351	0.928392	0.00655924
GSTZ1	0.776103	0.646437	0.931778	0.00657683
CDK11B	0.630853	0.452461	0.879578	0.00659524
MGC15885	0.464067	0.266657	0.80762	0.0066119
RAD23B	1.69795	1.15864	2.48829	0.00662564
SH3BP5	0.758814	0.621687	0.926188	0.00664842
NDUFB1	0.713514	0.55914	0.91051	0.00665485
MYO7A	0.846964	0.751201	0.954934	0.00666324
DBH	0.811238	0.697456	0.943583	0.00666539
SLC23A1	0.877784	0.79883	0.96454	0.00671315
CCDC157	0.798046	0.677912	0.93947	0.006727
MMGT1	1.44013	1.1062	1.87487	0.00673136
LAMB3	0.88486	0.809911	0.966746	0.00675068
FOXE1	0.77095	0.638679	0.930614	0.00675318
GABRQ	1.10946	1.02913	1.19606	0.00675572
TRMT5	0.563627	0.37221	0.853485	0.00676282
PTPN2	0.647992	0.473335	0.887096	0.00677754
CAND2	0.844517	0.747263	0.954427	0.00678552
QRFPR	0.855126	0.763516	0.957728	0.00678864
FLT3LG	0.818164	0.707507	0.946129	0.00679233
BCL2A1	0.867516	0.782674	0.961555	0.00679866
RNF31	0.611105	0.427722	0.873112	0.0068233
ENPEP	1.23396	1.05961	1.437	0.00683107
PGAM4	1.44131	1.10578	1.87864	0.00685781
PAFAH1B1	1.61468	1.1408	2.28541	0.0068684
MTA1	0.699424	0.539699	0.90642	0.00687631
IGF2BP1	1.14026	1.03669	1.25419	0.00690171
USP46	1.45457	1.10816	1.90927	0.00693415
USF2	0.684421	0.519722	0.901313	0.00693924
DOC2B	0.886389	0.81208	0.967498	0.00694212
MOSPD1	1.52421	1.12239	2.06989	0.00694453
N4BP2L1	0.784773	0.658043	0.935908	0.00699498
C9orf24	0.815836	0.703663	0.945892	0.0069954
PCDHGA1	1.1412	1.03674	1.25619	0.00700487
HNRNPC	0.483595	0.285152	0.820139	0.00702446
TIMM8A	1.37682	1.09119	1.73721	0.00702513
WLS	0.858826	0.768849	0.959332	0.007034
SLC45A1	0.833779	0.730514	0.951641	0.00704455
TRIM21	0.73934	0.593484	0.921041	0.00706914
SEC14L2	0.881653	0.804428	0.966293	0.00707931
GNG4	0.90509	0.84173	0.973219	0.00708
PSENEN	0.705705	0.547561	0.909523	0.00709091
CMTM4	1.29287	1.07229	1.55882	0.00711814
MTRF1L	1.59979	1.13562	2.25369	0.00720268
HARS2	1.76256	1.16557	2.6653	0.00722921
ZACN	0.714352	0.558852	0.91312	0.00724003
IL18	0.840722	0.740715	0.954233	0.00725348
PHF7	0.787787	0.661874	0.937654	0.00726496
VPS35	1.41026	1.0971	1.8128	0.00729035
IL2RG	0.878305	0.798872	0.965636	0.0072968
EGR3	0.887756	0.813796	0.968438	0.00730609
OSTM1	1.48135	1.11133	1.97457	0.00736525
CHORDC1	1.35337	1.08461	1.68874	0.00738307
MORN5	0.813872	0.70001	0.946255	0.00739756
TBC1D4	0.800352	0.679973	0.942042	0.00740876
FAM86B1	0.834618	0.731111	0.952779	0.00745096
NOS1AP	0.882635	0.805472	0.96719	0.00748014
TMEM70	1.43303	1.10088	1.86539	0.00748637
MMP7	0.918791	0.863451	0.977678	0.00753529
CD247	0.880684	0.802314	0.966709	0.00754055
TUBB2B	0.896153	0.826868	0.971244	0.0075701
SPOCK2	0.873362	0.790743	0.964613	0.00757302
ZAP70	0.896153	0.826854	0.971261	0.0075834
GMFG	0.798896	0.677505	0.942036	0.00758382
FXYD7	0.811545	0.696209	0.945988	0.00758709
DTX1	0.846082	0.74835	0.956576	0.00761118
HAUS2	1.46244	1.1062	1.9334	0.0076173
XG	1.17183	1.043	1.31656	0.00761945
FAU	0.741418	0.595135	0.923656	0.00762597
KLF15	0.87206	0.788596	0.964358	0.00765299
CFB	0.909129	0.847652	0.975065	0.0076575
CSNK1A1L	1.32572	1.07759	1.63097	0.0076581
CHPT1	0.818919	0.707014	0.948537	0.00770526
TACR1	0.898249	0.830049	0.972053	0.00773241
ZNF589	0.687424	0.521679	0.905827	0.00775413
CD3E	0.898143	0.829822	0.97209	0.00778626
TRAF3IP3	0.845418	0.747047	0.956742	0.00779969
OR8B4	35.8041	2.56523	499.733	0.00780456
C14orf93	0.651168	0.474717	0.893206	0.00780605
CHAD	0.935269	0.890275	0.982538	0.007808
GPR25	0.740944	0.59408	0.924115	0.00781067
TCF7	0.836053	0.732699	0.953985	0.00782216
EFHD2	0.761164	0.622408	0.930854	0.00786594
PDCD1	0.887547	0.812794	0.969175	0.00787385
RGS9	0.889188	0.815395	0.969659	0.00788375
SNAPC2	0.752822	0.610566	0.928222	0.00788422
THNSL2	0.870989	0.786605	0.964425	0.00789171
BFSP1	1.21794	1.05294	1.4088	0.00794386
DSC3	0.928649	0.879238	0.980836	0.00796368
RPS6	0.752227	0.609537	0.928321	0.00797747
HLA-DRB5	0.880131	0.800901	0.967199	0.00798057
BLK	0.899584	0.831928	0.972741	0.00798361
SELL	0.880532	0.801529	0.967322	0.00798578
ACSL5	0.850175	0.754074	0.958524	0.00799895
GPA33	0.817824	0.704857	0.948898	0.00801201
LIPH	1.1612	1.03965	1.29696	0.00806886
PCDHGA12	1.17059	1.04177	1.31534	0.00809942
ENOSF1	0.730576	0.578979	0.921867	0.00815527
MBOAT1	0.822465	0.711578	0.950631	0.0081652
STK17A	0.720604	0.565252	0.918653	0.00817336
TPD52	1.26318	1.06231	1.50203	0.00819334
SRD5A2	0.856218	0.763105	0.960692	0.00822585
ZNF831	0.891614	0.818885	0.970802	0.00822875
SEC14L3	0.111867	0.0220283	0.568099	0.00824208
BCL3	0.764804	0.626831	0.933146	0.00825009
UBD	0.91704	0.859926	0.977947	0.00829882
CDH22	0.865104	0.776804	0.963441	0.00834004
GCGR	0.71286	0.554338	0.916715	0.0083491
UTF1	0.549687	0.352318	0.857623	0.0083711
LIFR	0.851201	0.755113	0.959516	0.00838425
GRHL2	1.47967	1.10564	1.98024	0.0084031
RRM2B	1.30142	1.0698	1.58319	0.00842039
GNAI2	0.651507	0.473662	0.896128	0.00843278
LRRC14B	1.11197	1.02752	1.20336	0.0084465
AK3	0.675107	0.503931	0.904428	0.0084578
GSTT2	0.885957	0.809587	0.969532	0.00847056
MRPL16	0.652389	0.474558	0.896858	0.00852953
ITFG1	1.34124	1.07751	1.66952	0.00858327
ERCC1	0.668625	0.495232	0.902727	0.00858632
SPATA4	0.872308	0.78781	0.96587	0.00858929
KIF4B	1.23342	1.05473	1.44238	0.00860712
NIPA2	1.64395	1.13455	2.38206	0.00861122
ECHDC2	0.779764	0.647665	0.938806	0.00862072
IFT172	0.730076	0.577289	0.923302	0.00863796
SRP72	1.55387	1.11816	2.15936	0.00866075
PNRC2	0.674219	0.502264	0.905045	0.00868743
DDAH2	0.780069	0.647938	0.939144	0.00871458
ABHD14A	0.781091	0.649352	0.939557	0.00875425
MARVELD1	1.2885	1.06605	1.55738	0.008756
CPB2	1.15614	1.03725	1.28867	0.00878205
FIBCD1	1.0954	1.02321	1.17269	0.00879943
ICA1L	0.831782	0.724684	0.954709	0.008818
GRIA3	1.13422	1.0322	1.24633	0.00882186
GSTM2P1	0.749551	0.604073	0.930065	0.00883158
NDUFS1	1.49846	1.10699	2.02837	0.00884758
RIBC1	0.844616	0.744293	0.95846	0.00885508
ADPRH	0.739108	0.589375	0.92688	0.00886134
KLHDC7B	0.901334	0.83387	0.974256	0.00886963
PYY2	0.815387	0.699765	0.950114	0.00890042
CD226	0.860221	0.7684	0.963013	0.00893923
CLNK	0.771593	0.635232	0.937227	0.00896556
LACTB2	1.31226	1.07026	1.60899	0.00898057
CLDN11	0.882225	0.803061	0.969193	0.00899354
L1CAM	1.09155	1.022	1.16583	0.00910841
CHI3L1	0.919776	0.863705	0.979487	0.00916582
FAM81B	0.894361	0.822324	0.972709	0.00916611
CDHR3	0.886492	0.809681	0.970589	0.00917298
FRG2C	1.20683	1.04767	1.39017	0.00917976
AKNA	0.79922	0.675179	0.946051	0.00920231
GRAMD1C	0.831614	0.723854	0.955418	0.00921262
SNW1	0.529704	0.328332	0.854581	0.0092166
MYO3A	0.878855	0.797417	0.96861	0.00924706
SH2D1A	0.899726	0.830908	0.974243	0.00924891
UPRT	1.5831	1.12005	2.23759	0.00926449
TMEM101	0.839777	0.736273	0.957831	0.00926977
PTK2	1.39716	1.08585	1.79773	0.00931321
LYZL6	5.4893	1.51933	19.8327	0.0093721
LRRC23	0.773532	0.637286	0.938906	0.00938557
HLA-F	0.849628	0.751331	0.960787	0.00938664
SNORD115-7	5.39302	1.51152	19.242	0.00941741
KIR3DL2	0.829913	0.720891	0.955424	0.00947079
COG8	1.58873	1.11989	2.25385	0.00947095
GGCX	1.48285	1.10109	1.99697	0.00948454
HES5	1.22529	1.05089	1.42862	0.00949692
SPATA24	0.737203	0.585457	0.928279	0.0095179
SS18L2	0.666659	0.490671	0.905769	0.00951871
RPGRIP1L	1.33073	1.0722	1.65161	0.00953012
PHF20L1	1.3672	1.07928	1.73193	0.00953204
EXOC1	1.68461	1.1356	2.49904	0.0095432
WDR38	0.850337	0.752202	0.961277	0.00956485
MTHFS	0.691829	0.523562	0.914174	0.00956811
SDC3	0.776369	0.641076	0.940216	0.0095709
ZNF586	0.700848	0.535547	0.917169	0.00959922
DTX3	0.778381	0.643912	0.94093	0.00962017
CISD1	1.39516	1.08412	1.79544	0.00966704
TCHH	1.17597	1.04008	1.32962	0.00967607
PRKRIP1	0.700781	0.535293	0.917431	0.00968234
INSIG2	1.43973	1.0921	1.89801	0.00974353
ATG12	1.69512	1.13603	2.52936	0.00975065
CLEC2D	0.710603	0.548382	0.920812	0.0097682
C6orf163	0.783415	0.650995	0.942771	0.0097728
CD2	0.894391	0.821754	0.973448	0.00980401
AMY2B	0.859467	0.766149	0.964151	0.00980837
MYO1D	1.34685	1.07442	1.68836	0.00980846
FAM200A	0.652885	0.472361	0.902401	0.00982703
CD5	0.893641	0.820516	0.973283	0.00983189
NGFR	0.899906	0.830642	0.974946	0.00985453
CXCL2	0.898792	0.828822	0.974668	0.00986617
CXCL3	0.864504	0.773987	0.965607	0.00987538
ANXA8	0.9265	0.874299	0.981817	0.009876
MAP1LC3A	0.813172	0.694941	0.951518	0.00988269
KLRC2	0.863179	0.771858	0.965305	0.00991208
PSMD10	1.56787	1.11397	2.20672	0.00991249
RBMXL1	0.641769	0.458102	0.899073	0.0099237
GAS2	0.840537	0.736535	0.959226	0.00994662
OSBPL2	1.47537	1.09759	1.98317	0.00996684
CDC40	1.38907	1.08184	1.78356	0.00997344
RPL12	0.746941	0.598252	0.932585	0.00998849
NKAP	1.68495	1.13286	2.50609	0.00999918
CCDC107	0.77792	0.642603	0.941731	0.0100035
KDELR2	1.45379	1.09356	1.93267	0.0100057
RFX3	0.831287	0.722175	0.956885	0.0100572
TEX19	1.12639	1.02862	1.23345	0.0101954
GUCY2D	0.837501	0.731513	0.958845	0.0102075
HINT2	0.73931	0.587028	0.931095	0.0102685
TIPARP	0.78495	0.652401	0.944429	0.010293
VHL	1.37568	1.0782	1.75524	0.0102998
PRPF38B	0.639019	0.45385	0.899736	0.010313
LRRC8D	0.73022	0.574244	0.928561	0.0103317
PCDHGA2	1.13357	1.02999	1.24756	0.0103348
CD40	0.811802	0.692137	0.952157	0.0103924
ZIC5	1.0917	1.02082	1.16751	0.0104218
SULT4A1	0.910483	0.847424	0.978234	0.0104399
TTC29	0.819552	0.703773	0.954378	0.0104406
PAOX	0.761046	0.617503	0.937956	0.010449
CELSR2	0.850814	0.751817	0.962847	0.010472
BAMBI	1.12497	1.02797	1.23113	0.0104833
TMC7	1.20872	1.04539	1.39756	0.0104877
WDR83	0.775133	0.637761	0.942094	0.0104885
PHC1	0.7149	0.552743	0.92463	0.010558
C2orf88	0.859582	0.765448	0.965292	0.0105608
RAB18	1.41615	1.08453	1.84918	0.0105867
XCL1	0.873468	0.787398	0.968946	0.0105885
BCL11B	0.892621	0.818155	0.973866	0.0105948
FAM91A1	1.31785	1.06628	1.62878	0.0106564
GPR157	1.21137	1.04555	1.40349	0.0106802
YTHDF3	1.41853	1.08441	1.85561	0.0107328
EOMES	0.893748	0.819834	0.974325	0.0107557
XCL2	0.876494	0.792044	0.969947	0.0107637
RPS24	0.73582	0.581195	0.931582	0.0108097
IL33	0.913633	0.852319	0.979356	0.0108187
TTC21A	0.804064	0.679902	0.9509	0.0108259
MAP4K1	0.872445	0.785505	0.969008	0.0108415
SCARNA16	0.737881	0.584009	0.932296	0.0108502
SOCS1	0.855203	0.758215	0.964598	0.0108698
MEA1	0.68346	0.509867	0.916155	0.0109056
RPL28	0.790618	0.659779	0.947404	0.010918
YME1L1	1.51286	1.09986	2.08095	0.0109254
DOK7	0.921951	0.866016	0.981499	0.0109358
PSMD7	1.41145	1.0824	1.84051	0.010938
DCAF12L2	0.873879	0.787644	0.969556	0.0109843
BTLA	0.892309	0.817226	0.974291	0.0110621
GADD45A	0.789919	0.658528	0.947525	0.0110637
TMEM14C	0.641211	0.455087	0.903458	0.0110752
MT1M	0.879754	0.796954	0.971156	0.0110753
C6orf226	0.786669	0.653713	0.946666	0.0110791
C12orf54	0.702691	0.535151	0.922683	0.0111163
SLAMF6	0.897601	0.825734	0.975724	0.0111765
IVL	1.0829	1.01826	1.15164	0.0112045
SLCO1A2	0.875858	0.790574	0.970342	0.0112136
SS18	0.58693	0.388766	0.886102	0.0112345
RPS3	0.764849	0.621676	0.940995	0.011242
TESC	0.871084	0.782908	0.969192	0.0112558
NONO	1.68426	1.12537	2.52071	0.0112733
PPA2	1.53652	1.1022	2.142	0.0112759
SLC27A2	0.915704	0.855401	0.980257	0.0112874
CDK14	0.812965	0.692566	0.954295	0.0113409
LAMP3	0.898026	0.82624	0.976049	0.0113979
SYT8	0.919684	0.861926	0.981312	0.011406
ZNF765	1.37836	1.0749	1.7675	0.0114304
PANX1	1.44607	1.08656	1.92453	0.0114314
CFP	0.866504	0.77541	0.968299	0.0114586
SFRP1	0.930739	0.880349	0.984014	0.0114903
MAT2A	1.62369	1.11488	2.36471	0.0115077
ZFC3H1	1.39418	1.07737	1.80416	0.0115185
CHMP6	0.727399	0.56825	0.931121	0.0115218
RNF186	0.843715	0.739493	0.962626	0.0115309
THSD7B	0.888457	0.810528	0.973879	0.0115679
GTPBP1	0.644136	0.457821	0.906275	0.0115733
RGL3	0.911448	0.848142	0.97948	0.0115873
FAM114A1	1.31171	1.06252	1.61934	0.0115988
ANO6	1.40534	1.07889	1.83057	0.0116371
TSGA10	0.786416	0.652492	0.947828	0.0116521
CYP4F12	0.905184	0.837752	0.978044	0.0116681
SIRPG	0.898986	0.827575	0.976559	0.0116804
RPL36AL	0.714758	0.550538	0.927964	0.0116929
CXCL6	0.871654	0.783338	0.969928	0.0117307
CADM4	0.827547	0.714254	0.95881	0.0117384
HNRNPA1	0.637302	0.448911	0.904754	0.0117421
RTN4IP1	1.28108	1.05655	1.55332	0.0117541
FCRL3	0.90401	0.835735	0.977862	0.0117784
ZNF382	0.800154	0.672669	0.9518	0.0118072
PDLIM4	0.866396	0.774875	0.968727	0.0118105
P2RX1	0.878582	0.794301	0.971805	0.011876
LRRC2	0.857709	0.761002	0.966707	0.0119129
ZNF75D	1.46618	1.08796	1.97589	0.0119444
LELP1	10.8664	1.69041	69.8518	0.0119731
LDLRAD3	0.845418	0.741598	0.963771	0.0120059
CDHR1	0.881847	0.799429	0.972763	0.01202
ZNF250	1.3749	1.07241	1.76272	0.0120245
BIN3	0.745362	0.592568	0.937554	0.0120435
NGB	1.14501	1.03013	1.27272	0.0120678
LIME1	0.874153	0.786964	0.971001	0.012111
CCDC17	0.83024	0.717884	0.96018	0.0121527
LGR6	0.920402	0.862626	0.982049	0.0121552
PLXNB3	1.17854	1.03645	1.34011	0.0122076
ADORA3	1.24046	1.04807	1.46817	0.012213
CD1E	0.903137	0.833962	0.97805	0.0122153
CXCL14	0.92295	0.866839	0.982693	0.0122278
STAR	0.851674	0.751115	0.965695	0.0122627
OXR1	1.28273	1.05562	1.55871	0.012265
ZBTB17	0.726685	0.566022	0.932951	0.0122669
CXorf65	0.788232	0.654229	0.949683	0.0123143
TTC32	0.778239	0.639514	0.947058	0.0123146
HYAL3	0.786133	0.651105	0.949164	0.012329
MFAP3L	1.15778	1.03223	1.29861	0.0123612
ABCB7	1.60423	1.10774	2.32325	0.0123658
RPSAP58	0.71639	0.551618	0.93038	0.012381
EIF4E	1.49405	1.09071	2.04654	0.0123904
DNAH9	0.882282	0.799789	0.973283	0.0123965
RSPH1	0.892671	0.816601	0.975828	0.0124754
TMEM91	0.818141	0.698921	0.957698	0.0124952
LTK	0.856723	0.758818	0.96726	0.0125036
CD96	0.897321	0.824169	0.976965	0.0125218
FBXO6	0.771625	0.629546	0.945769	0.0125259
FLRT1	0.825869	0.710705	0.959693	0.0125285
RPL34	0.760817	0.613824	0.94301	0.0125718
ZNF672	0.664698	0.482276	0.916121	0.0125893
GAPVD1	1.48928	1.08917	2.03639	0.0125948
ZNF26	0.676055	0.497054	0.919518	0.0126085
SDC1	1.20098	1.03995	1.38695	0.0126586
MBTPS2	1.34114	1.06479	1.68921	0.0126601
DDAH1	0.799431	0.670404	0.953291	0.0126808
LRRC4C	0.897774	0.824772	0.977238	0.0127003
ZFP28	0.80175	0.673845	0.953933	0.012709
ZNF28	1.35502	1.06695	1.72086	0.0127244
ZNF404	0.802542	0.675009	0.954171	0.0127291
SLCO6A1	1.31279	1.05974	1.62627	0.0127377
TP53TG1	0.82816	0.713932	0.960664	0.0127775
MYBPC2	0.856385	0.757968	0.96758	0.0128068
UBASH3A	0.898125	0.825209	0.977485	0.0128797
SMARCD3	0.830484	0.717301	0.961526	0.0129624
ZNF648	0.87867	0.793384	0.973123	0.0130295
DIRC3	1.18859	1.03706	1.36227	0.013031
BCAS3	1.36802	1.06822	1.75195	0.0130321
ZNF750	1.149	1.02968	1.28216	0.0130368
RPLP2	0.777454	0.637339	0.948373	0.0130368
C10orf67	0.815726	0.694567	0.958021	0.0130385
ADAM20	0.73813	0.580796	0.938085	0.013045
ACSF2	0.853203	0.752687	0.967141	0.0130502
CCDC74A	0.902316	0.831971	0.978609	0.0130607
PRKCB	0.893306	0.817157	0.976551	0.0130674
VPS41	1.46909	1.08424	1.99055	0.0130726
LSP1	0.835385	0.72476	0.962896	0.0130776
PSMD2	1.45668	1.08228	1.9606	0.0130788
SERINC3	1.38606	1.071	1.79382	0.0130912
EML3	0.717462	0.551903	0.932685	0.0131163
KIR2DS4	0.801664	0.673143	0.954722	0.0131493
ZNF230	0.725365	0.562724	0.935013	0.0131862
ZNF789	0.755739	0.605581	0.94313	0.0132107
CD7	0.891596	0.814227	0.976317	0.0132318
ZNF358	0.769173	0.624949	0.946681	0.0132435
TATDN1	1.31648	1.05908	1.63643	0.0132472
OR5D14	33.2015	2.07723	530.676	0.0132518
EDAR	0.86489	0.771002	0.970212	0.0132955
CD48	0.868758	0.777172	0.971136	0.0133141
RIMKLB	0.760067	0.611599	0.944576	0.0133538
FAM98B	1.45938	1.08168	1.96895	0.0133687
NUB1	0.62116	0.425915	0.905909	0.0133902
RFNG	0.739197	0.58175	0.939255	0.0134071
PNKD	0.764375	0.617725	0.94584	0.0134248
NOP14	1.60258	1.10262	2.32924	0.0134362
CD207	0.905958	0.837699	0.97978	0.0134707
HLA-DQB1	0.875373	0.787641	0.972877	0.0135001
HLA-DPB2	0.859243	0.761788	0.969165	0.0135156
TNFRSF8	0.860441	0.763686	0.969455	0.0135243
PSCA	1.07478	1.01498	1.13811	0.0135511
ATCAY	1.17874	1.03448	1.34311	0.0135522
SAA4	0.893395	0.81691	0.977041	0.0135642
UBQLN2	1.56355	1.09642	2.22972	0.013576
ACAA1	0.739187	0.581464	0.939692	0.013589
PTPN6	0.744108	0.588392	0.941033	0.0136132
OMG	0.758685	0.609221	0.944818	0.0136238
GBP1	0.870173	0.779125	0.971861	0.0136581
DAPK2	0.813637	0.690628	0.958557	0.0136603
LRRN1	0.912307	0.848123	0.981347	0.0136691
OR5AU1	1.32235	1.05898	1.65123	0.0136744
HLA-H	0.847034	0.742283	0.966568	0.0137082
MYD88	0.66317	0.478391	0.919319	0.0137094
ADK	1.4347	1.07662	1.91187	0.0137439
ANKRD53	0.846173	0.740883	0.966427	0.0137529
BATF	0.874235	0.785542	0.972943	0.0137967
KCNH8	0.894415	0.818405	0.977486	0.0137972
ATP6V1C1	1.33744	1.06113	1.68569	0.0137973
SNORA57	0.711299	0.542365	0.932851	0.0138012
ZBBX	0.849224	0.745604	0.967244	0.0138323
SSTR5	1.16908	1.03234	1.32392	0.0138332
CD79B	0.892799	0.815716	0.977168	0.0138431
APOD	0.919879	0.860687	0.983142	0.0138559
LRGUK	0.872254	0.782281	0.972576	0.0138709
PHYHIPL	0.879485	0.793943	0.974244	0.0139031
HSPH1	1.29343	1.05363	1.5878	0.0139213
PROM2	1.28831	1.05256	1.57686	0.0140224
RAB1A	1.71291	1.11488	2.63173	0.0140381
CCR7	0.89645	0.821541	0.978188	0.0140769
VWA2	0.921119	0.862625	0.983579	0.0141042
BRD4	0.654552	0.466605	0.918204	0.0141232
CAND1	1.36186	1.06412	1.7429	0.0141394
GREB1L	0.916051	0.854079	0.982519	0.0141507
TUBGCP5	1.4897	1.08332	2.04853	0.0141926
FAM199X	1.40003	1.06983	1.83214	0.0142155
IL22RA1	0.874603	0.785742	0.973514	0.0142455
THEMIS	0.895654	0.820081	0.978191	0.0142768
SOX10	0.946129	0.90512	0.988997	0.0143113
XKR7	1.13209	1.02509	1.25026	0.0143209
CEACAM1	0.876181	0.788226	0.97395	0.0143257
ABCG4	1.29971	1.05371	1.60315	0.0143378
FBLN5	0.844176	0.737125	0.966775	0.0143514
INPP1	0.771628	0.626866	0.94982	0.0144604
POLL	0.69775	0.522906	0.931055	0.014471
JAK1	0.739615	0.58078	0.94189	0.0144729
WAS	0.835825	0.723877	0.965085	0.014511
RGPD8	1.12832	1.02419	1.24304	0.0145304
DNAJC13	1.48055	1.08069	2.02836	0.014562
NACAD	0.868152	0.775038	0.972454	0.0145862
CHD5	1.122	1.02299	1.23059	0.0145981
UBE2L6	0.812871	0.688335	0.959939	0.014613
UBE2G1	1.57464	1.09372	2.26703	0.0146158
CCT4	1.47514	1.07971	2.0154	0.014621
RABGAP1	1.56255	1.09185	2.23618	0.0146684
PSORS1C3	0.703444	0.530306	0.933109	0.0146774
FKBP5	0.858403	0.759327	0.970406	0.0146847
MAP3K4	1.47867	1.07992	2.02466	0.0147083
APOL2	0.776288	0.633337	0.951505	0.0147406
DCUN1D4	1.51946	1.08558	2.12675	0.0147429
CR1L	0.831079	0.716142	0.964464	0.0148338
ZNF470	0.799764	0.668167	0.957278	0.014852
ZNF620	0.795946	0.662371	0.956458	0.0148943
COPS6	0.660389	0.472832	0.922343	0.0149244
VIT	0.904137	0.833671	0.98056	0.0149265
WDR55	1.5841	1.09372	2.29434	0.0149342
IFT57	0.734906	0.573439	0.941837	0.0149593
ING2	0.694617	0.517929	0.931582	0.0149663
CD69	0.889288	0.809056	0.977476	0.0150075
ANKRD55	0.851296	0.747709	0.969233	0.0150145
WDR72	0.929995	0.877152	0.986021	0.015031
RAD54B	1.21515	1.03852	1.42184	0.0150354
AMPD1	0.881892	0.796908	0.975939	0.0150554
PYHIN1	0.900213	0.827046	0.979853	0.0150772
RAD1	1.51565	1.08383	2.11953	0.015081
AP3M1	1.42724	1.07115	1.90173	0.015128
SNAP91	0.873646	0.783436	0.974244	0.0151311
SLC16A11	0.888174	0.807123	0.977365	0.0151444
HEATR3	1.32928	1.05648	1.67252	0.0151502
CCDC146	0.82178	0.701349	0.962892	0.0151969
SLC6A1	1.20859	1.03714	1.40837	0.0152161
RLN1	0.814619	0.690234	0.961419	0.0152921
TUBA3C	0.892716	0.814478	0.978469	0.0153053
MYO15B	0.865686	0.770419	0.972733	0.01532
RASAL3	0.853193	0.75043	0.970028	0.0153216
XPOT	1.3122	1.05343	1.63454	0.0153316
LRRTM3	1.19379	1.03448	1.37763	0.0153596
MOAP1	0.735039	0.573062	0.942799	0.0153618
LIN7C	0.659444	0.470874	0.923531	0.0153976
NTRK2	0.902823	0.831126	0.980706	0.0154597
RPLP0	0.72664	0.561122	0.940982	0.0154692
TNFAIP8	0.793556	0.658078	0.956926	0.0154803
ZNF362	0.676442	0.492911	0.928309	0.0154944
CNGA2	1.10153	1.01857	1.19124	0.0154992
PFN4	0.810299	0.683348	0.960836	0.0155423
NUP155	1.26799	1.04601	1.53708	0.0156026
PSMD1	1.57189	1.08944	2.26799	0.015608
SHMT2	1.34777	1.0581	1.71674	0.0156312
KIAA1755	0.880473	0.794128	0.976207	0.0156393
DUS1L	0.757008	0.604033	0.948725	0.0156506
THOC1	0.684515	0.503366	0.930856	0.015657
ICAM4	0.842139	0.73259	0.96807	0.0156768
CCDC160	0.90413	0.833156	0.98115	0.0156833
LARP1	1.53416	1.08405	2.17118	0.0157175
RPS15	0.797276	0.663354	0.958236	0.01575
SERTAD1	0.761513	0.61041	0.950021	0.0157651
YIPF4	1.54062	1.08473	2.18812	0.0157663
NOS1	1.16344	1.02882	1.31566	0.0158272
SGSH	0.692637	0.513894	0.93355	0.0158886
PDHA2	2.16679	1.15566	4.0626	0.0159064
CRISP3	1.05616	1.01028	1.10413	0.0159073
C1GALT1C1	1.4816	1.07622	2.03965	0.0159365
RAB4B	0.754671	0.600247	0.948824	0.015966
STT3A	1.43102	1.06917	1.91532	0.0159663
HEPACAM	0.888686	0.807342	0.978226	0.0159776
PTPN7	0.873659	0.782689	0.975202	0.0160588
CYP2D6	0.86728	0.77233	0.973904	0.0160868
CC2D1B	0.649101	0.456538	0.922884	0.0160878
CAMK2B	0.91256	0.847032	0.983156	0.0160933
TNFSF12-TNFSF13	0.931725	0.879569	0.986973	0.0161236
SNRNP35	0.738955	0.577541	0.945481	0.0161373
GADL1	1.23836	1.04031	1.47411	0.0161961
RDH16	1.11024	1.0195	1.20905	0.0162202
SEC14L5	0.868597	0.7743	0.974377	0.016276
TMEM71	0.883143	0.797974	0.977402	0.0163177
TMEM163	0.861602	0.762899	0.973075	0.0164111
CYTIP	0.8768	0.787484	0.976247	0.0164616
COL6A6	0.904705	0.833612	0.981861	0.0164687
RBM41	1.37524	1.05996	1.7843	0.0164736
CLEC6A	0.819176	0.695942	0.964232	0.0164919
SIRT7	0.742337	0.581829	0.947124	0.0165297
CYBA	0.856253	0.754196	0.972119	0.0165452
CXCR3	0.896719	0.820236	0.980333	0.0165461
NRG1	0.904598	0.833375	0.981908	0.016561
TTC22	0.908668	0.8402	0.982716	0.0165679
CXCL16	0.789121	0.650136	0.957819	0.0165772
U2AF1L4	0.748277	0.590257	0.948601	0.0165777
PABPN1	0.675275	0.489707	0.931163	0.01662
PTPRZ1	0.9279	0.872777	0.986504	0.0166285
JUND	0.802609	0.670403	0.960887	0.0166462
BEGAIN	0.87184	0.77917	0.975533	0.0167569
JRKL	1.20983	1.03499	1.41421	0.0167678
EIF4G1	1.52545	1.079	2.15663	0.0168313
MICAL1	0.798048	0.663271	0.960212	0.0168416
ZC3H14	0.64685	0.452542	0.924589	0.0168419
NEFH	0.891978	0.812157	0.979644	0.0168512
RPS19	0.794208	0.657451	0.959412	0.0168621
CIITA	0.875424	0.784846	0.976456	0.0169626
RPS16	0.758577	0.60456	0.95183	0.0170176
ACADM	0.772789	0.625347	0.954994	0.0170183
STAB2	0.875786	0.785375	0.976605	0.0170426
BTN3A3	0.814766	0.688547	0.964122	0.0170598
FGD3	0.89203	0.812087	0.979843	0.0170779
SGK3	0.845066	0.735876	0.970458	0.0170893
EGR2	0.864898	0.767641	0.974478	0.0170912
MRPS18C	1.57778	1.08456	2.2953	0.0171068
DHX15	1.52959	1.07849	2.16939	0.0171371
HMSD	0.810319	0.681629	0.963304	0.017141
AIMP1	1.4266	1.06516	1.91069	0.0171537
C19orf54	0.719958	0.549492	0.943305	0.0171566
APOA1	0.864435	0.766822	0.974473	0.0171746
ST3GAL1	1.2173	1.03543	1.43112	0.0172365
PPP1R16B	0.880508	0.79293	0.977758	0.0172761
PHF21A	0.6164	0.413872	0.918035	0.0172775
KRT6B	0.946503	0.904615	0.99033	0.0172786
EIF3F	0.685702	0.502515	0.935667	0.0173467
RING1	0.712529	0.538885	0.942125	0.0173928
ENOX2	1.43046	1.06494	1.92144	0.0174115
LST1	0.840744	0.728668	0.970059	0.0174821
PNPLA5	0.723406	0.553864	0.944846	0.0174852
DLAT	1.42108	1.06329	1.89928	0.0175666
PAK1	0.778242	0.632695	0.957271	0.0176278
TRMT2A	0.754648	0.598109	0.952157	0.0176309
LRAT	0.915292	0.850759	0.98472	0.0176577
ABHD8	0.768306	0.617969	0.955216	0.0176743
RDH14	0.63039	0.430567	0.92295	0.0176837
IGFBP6	0.863984	0.765572	0.975046	0.0178106
FCRL6	0.880548	0.792577	0.978282	0.0178441
B4GALNT2	1.0896	1.01492	1.16978	0.0178512
NGDN	0.625605	0.42433	0.922352	0.0178823
IMMT	1.67241	1.09263	2.55983	0.0178927
POM121L1P	0.743988	0.582421	0.950374	0.0179118
ROPN1	0.929697	0.875246	0.987536	0.0179195
RGS1	0.88121	0.793606	0.978486	0.0179299
C5orf60	0.672773	0.484513	0.934182	0.0179583
TP53I11	1.31094	1.04761	1.64047	0.0179584
TAF9B	1.37579	1.05625	1.79202	0.017994
EMID1	0.89492	0.816188	0.981248	0.018135
PEX3	1.38991	1.0576	1.82663	0.0181907
STAT5A	0.806238	0.674271	0.964033	0.018196
KCTD17	0.794167	0.655822	0.961696	0.0182797
RPL19	0.784082	0.640628	0.95966	0.0183064
HIPK2	0.836606	0.721312	0.970328	0.0183689
ZCCHC17	0.658715	0.465568	0.93199	0.0183857
GIMAP7	0.856628	0.753218	0.974235	0.0183915
PCSK9	0.895933	0.817706	0.981643	0.0184025
STC2	0.919783	0.858005	0.986009	0.0184153
LSG1	1.51107	1.0718	2.13036	0.0184898
PBX4	0.864962	0.7666	0.975944	0.0185076
VSIG1	0.875334	0.783523	0.977904	0.018513
ANO9	0.861207	0.760495	0.975258	0.0185328
CSTA	0.888225	0.804765	0.980341	0.0185553
ACCSL	2.19889	1.14105	4.23743	0.0185634
RAP1GAP2	1.19803	1.0307	1.39253	0.0185795
CLOCK	1.20781	1.03208	1.41348	0.0185974
RPS25	0.75896	0.603203	0.954935	0.0186008
ICOSLG	1.22416	1.03438	1.44876	0.0186122
ITGA10	0.879124	0.789661	0.978723	0.0186369
KDM4B	0.841228	0.728381	0.971558	0.0186434
TMEM41A	1.5156	1.07184	2.1431	0.0186507
MAX	0.625867	0.423545	0.924834	0.0186636
DHRS7	0.752968	0.594422	0.953802	0.0186698
SLC39A8	0.836641	0.721053	0.970758	0.0187137
PCP2	0.909392	0.840133	0.984361	0.018776
ENKUR	0.872259	0.778276	0.977592	0.0187945
EZR	1.35285	1.05139	1.74076	0.0187966
SLC47A2	0.812781	0.68371	0.966217	0.0187996
C16orf54	0.881799	0.793949	0.979368	0.0188079
EXD1	1.24441	1.03687	1.4935	0.0188278
C11orf21	0.873365	0.780059	0.977832	0.0188321
CLTA	0.673463	0.48418	0.936742	0.018869
NSF	1.34072	1.04965	1.71249	0.0188724
ESRRG	0.912133	0.84471	0.984937	0.0189075
ASTL	0.849473	0.741254	0.973493	0.0189583
NOMO2	1.2733	1.04059	1.55805	0.0189585
RLN2	0.901365	0.826461	0.983058	0.0189767
NKG7	0.89799	0.820771	0.982473	0.0190059
UBQLN1	1.47055	1.06542	2.02972	0.019008
GLIPR1	0.810986	0.68073	0.966166	0.0190135
HBZ	0.572092	0.358711	0.912404	0.0190331
TRIP6	0.849182	0.740709	0.97354	0.0190504
RPSA	0.748505	0.587522	0.953598	0.0190519
NPHP1	0.833213	0.715333	0.970519	0.0190546
ANO7	0.832766	0.71455	0.97054	0.0191413
AAK1	1.47066	1.06495	2.03093	0.0191776
GDF5	0.902255	0.827837	0.983362	0.0191822
APOM	0.841745	0.728689	0.972342	0.0192265
UCP3	0.813311	0.684079	0.966956	0.0192547
SERPINB9	0.836411	0.720185	0.971394	0.0192749
RNASE9	3.51891	1.22663	10.0949	0.0192911
RNF4	1.66431	1.08613	2.55029	0.0193156
TMEM190	0.836865	0.720832	0.971576	0.0193553
RACGAP1	1.23682	1.035	1.47799	0.0193642
RPS13	0.734837	0.567539	0.95145	0.0194108
MFSD6L	0.909451	0.839831	0.984843	0.0195003
LRRC43	0.88165	0.793208	0.979954	0.0195222
POLR2C	1.47274	1.06406	2.03839	0.0195762
CD8B	0.904101	0.830722	0.983961	0.0195774
PCDHB8	1.10786	1.01656	1.20737	0.0195862
WNT11	0.904684	0.831694	0.98408	0.019603
SIT1	0.902067	0.82725	0.983651	0.0196418
SPHKAP	0.897075	0.818841	0.982783	0.019649
CDKN1C	0.85026	0.741928	0.974409	0.0196601
PTGS2	0.902513	0.827989	0.983744	0.0196636
TP73	0.881504	0.792832	0.980094	0.019718
CLUL1	0.897767	0.819936	0.982985	0.0197599
APOBEC4	0.844397	0.732451	0.973453	0.0197674
RLIM	1.49257	1.06576	2.0903	0.0197755
PPAT	1.31245	1.04416	1.64968	0.0197888
SHBG	0.778926	0.631302	0.961071	0.019789
CLDN25	0.807919	0.675229	0.966683	0.0197987
DYNLT1	1.3676	1.05083	1.77984	0.019869
ROPN1B	0.926409	0.868646	0.988013	0.0199603
COCH	0.91741	0.853161	0.986497	0.0199673
APOL3	0.850081	0.741328	0.974788	0.0200414
HLCS	1.39364	1.05357	1.84349	0.0200421
LIPT1	0.668782	0.476471	0.938714	0.0200421
TMC3	0.896898	0.818302	0.983044	0.0200481
KIF19	0.896258	0.817216	0.982944	0.0200626
SYS1-DBNDD2	1.19794	1.02876	1.39494	0.0200702
CYTH1	0.702265	0.521316	0.946022	0.0200731
AASS	0.846134	0.734907	0.974195	0.0201496
ARHGEF3	0.775907	0.626374	0.961137	0.0201871
HNRNPD	0.63066	0.427364	0.930663	0.0202385
FASLG	0.894754	0.814558	0.982844	0.0202788
EML1	1.23253	1.03302	1.47057	0.0203081
MYEOV	0.917926	0.853873	0.986784	0.0203158
STARD3NL	1.54412	1.06974	2.22885	0.0203423
MAL	0.897224	0.818672	0.983313	0.0203443
TMEM65	1.22517	1.032	1.45448	0.0203497
HDAC2	1.29604	1.04104	1.61349	0.0203508
AIFM1	1.4587	1.06028	2.00683	0.0203619
ALOX15B	0.926937	0.869372	0.988313	0.0203757
ZC3H12A	0.826557	0.703637	0.970951	0.0204047
SP100	0.748517	0.585945	0.956195	0.0204222
LPXN	0.809311	0.67676	0.967824	0.0204308
RUFY4	0.893498	0.812325	0.982783	0.0204842
SERPINF2	0.872733	0.777791	0.979263	0.0205271
TUBA4B	0.874617	0.780825	0.979676	0.0206272
PAGE5	1.12345	1.01796	1.23986	0.0206796
SKAP1	0.902702	0.827702	0.984497	0.0207224
FMO9P	1.16472	1.0235	1.32541	0.020764
CACNG8	1.55432	1.0695	2.2589	0.0207652
BCL9L	1.45973	1.05921	2.01172	0.020807
TYK2	0.691408	0.50559	0.945519	0.0208464
RSPRY1	1.29275	1.0397	1.60739	0.0208754
GK	0.789291	0.645733	0.964763	0.0208772
SKP1	1.42662	1.05532	1.92857	0.0208879
SART1	0.800888	0.663331	0.966971	0.0209275
SNX22	0.812391	0.681024	0.969097	0.0209561
SRRM5	0.772384	0.620316	0.961732	0.0209561
MAPKAPK3	0.695489	0.510944	0.94669	0.0209891
MIIP	0.781972	0.634559	0.96363	0.0210226
SH2B2	0.854439	0.747508	0.976665	0.0211054
NAA15	1.38394	1.04985	1.82434	0.0211618
LARP6	0.833993	0.7147	0.973198	0.0211712
RBP4	0.926077	0.86753	0.988575	0.0211773
SP5	0.917035	0.851909	0.987139	0.0212025
REC8	0.891012	0.807685	0.982935	0.0212475
ALX4	0.888348	0.803214	0.982505	0.0212589
UBE2W	1.32115	1.04239	1.67445	0.0212592
ALKBH4	0.708363	0.528231	0.949921	0.0212709
PCDHGB5	1.09256	1.01326	1.17806	0.021296
DCLK3	1.20202	1.02776	1.40583	0.0212976
FOXD1	1.08383	1.01203	1.16073	0.0213406
BCLAF1	1.53581	1.06561	2.21349	0.0214059
CXCR6	0.89538	0.814907	0.9838	0.0214548
UBXN2B	1.32904	1.04287	1.69374	0.0214912
FBXO5	1.23795	1.03197	1.48505	0.0215121
DSG3	0.942891	0.896774	0.991379	0.0215408
MDFIC	0.804521	0.668313	0.96849	0.0215465
ERCC6L	1.18228	1.02495	1.36375	0.0215472
ZBTB48	0.732914	0.562283	0.955323	0.0215628
EEF1G	0.753414	0.591743	0.959256	0.0215902
KCNE2	1.26572	1.03511	1.5477	0.0216624
PLIN5	0.927347	0.869517	0.989024	0.021682
LIMCH1	1.18142	1.02469	1.36212	0.0216858
PIK3CA	1.30794	1.04003	1.64487	0.0216985
CLEC17A	0.881291	0.791153	0.981699	0.0217058
CCDC115	0.679046	0.487916	0.945048	0.0217278
MGAM	0.922637	0.861285	0.98836	0.0218211
PTPDC1	1.39049	1.0491	1.84299	0.0218252
AGTRAP	0.768911	0.614178	0.962627	0.0218933
ZSCAN1	0.905711	0.832168	0.985753	0.0219018
GIGYF1	0.7661	0.609956	0.962214	0.0219524
EIF3G	0.737574	0.568486	0.956956	0.0219555
ZSWIM3	1.42276	1.05214	1.92393	0.0220172
CDNF	0.823778	0.697826	0.972464	0.0220339
UNC50	1.72008	1.08123	2.73639	0.0220405
SNX15	0.687611	0.498899	0.947703	0.0221307
GPM6A	0.912223	0.843184	0.986914	0.0221366
FKBP11	0.80485	0.6682	0.969447	0.0222064
RPSAP9	0.73592	0.565776	0.957232	0.0222664
TIMM9	0.656115	0.457135	0.941707	0.02227
FMNL1	0.829358	0.706408	0.973707	0.022288
SNRNP70	0.744698	0.578343	0.958904	0.0222953
OR4A15	1.89085	1.09492	3.26535	0.0222964
RANGRF	0.782029	0.633352	0.965607	0.0222972
SLC27A6	0.924658	0.864573	0.988919	0.0223124
SYT1	0.935468	0.883442	0.990557	0.0223158
GPT	0.915849	0.849328	0.98758	0.0223242
ZNF80	0.874921	0.780076	0.981298	0.0224626
CORO1A	0.861207	0.757502	0.979111	0.0224641
ACOT1	0.820265	0.691924	0.972411	0.0224758
FAM131A	0.750821	0.58701	0.960346	0.0224792
PKHD1L1	0.889314	0.804085	0.983577	0.0224826
CIR1	0.638262	0.434026	0.938604	0.02249
EPHA5	1.20608	1.02678	1.41669	0.022499
PDCD2	1.44842	1.05348	1.99142	0.0225675
FCRL2	0.900547	0.822998	0.985403	0.0226068
SFRP5	0.867641	0.767908	0.980327	0.0226743
TMEM200C	0.886653	0.799495	0.983312	0.0226831
GIMAP2	0.852095	0.742401	0.977998	0.0228231
MGAT3	0.879288	0.787056	0.98233	0.0228885
STEAP1	0.86643	0.765721	0.980384	0.0229541
ZNF853	0.853627	0.744769	0.978397	0.0229814
TNFSF12	0.785816	0.638364	0.967328	0.0230109
ANKRD36	0.809325	0.674332	0.971342	0.0230698
CHRNE	0.83778	0.719125	0.976013	0.023113
TMC8	0.865098	0.763419	0.980319	0.0231143
RPS7	0.765974	0.608523	0.964163	0.0231589
ZMYND10	0.922436	0.860339	0.989016	0.0231726
RFXANK	0.757901	0.596604	0.962805	0.023182
MT3	0.840108	0.722792	0.976466	0.0231891
QRSL1	1.28301	1.03461	1.59106	0.0232161
RPL23	0.786831	0.639592	0.967966	0.0233311
ZBED2	0.90716	0.833894	0.986864	0.0233461
CPNE3	1.27325	1.03329	1.56894	0.0233689
CCDC69	0.865559	0.763996	0.980622	0.0233755
ANKDD1A	0.789055	0.642861	0.968495	0.0234412
SIM2	1.10124	1.01311	1.19704	0.0234535
EPHA3	1.11391	1.01466	1.22286	0.0234721
CERKL	0.834284	0.713239	0.975872	0.0234917
PSMB9	0.865353	0.763572	0.980701	0.0235001
GPR27	0.87931	0.78669	0.982834	0.0235208
NLN	1.28123	1.03392	1.58769	0.0235217
ASGR2	0.84586	0.731776	0.977729	0.0235334
ICMT	1.59884	1.06506	2.40013	0.0235716
LCP1	0.856111	0.748347	0.979394	0.0236176
OR2B11	0.411959	0.191116	0.887999	0.0236303
NLRC3	0.829265	0.705134	0.975248	0.0236413
ACSM4	1.77763	1.08006	2.92576	0.0236422
GSPT2	0.877948	0.784337	0.982731	0.023649
KLHL29	0.866764	0.765777	0.981068	0.023674
PASK	0.770583	0.614838	0.96578	0.023684
NOS2	1.17557	1.02178	1.35252	0.0237546
COPG2	0.735157	0.563051	0.959869	0.0237621
OR6B3	0.695199	0.507262	0.952765	0.0237675
C4BPA	0.907535	0.834313	0.987183	0.0237894
G6PD	1.23702	1.02868	1.48756	0.023795
STK39	0.839075	0.720606	0.97702	0.0238626
PTPMT1	0.699471	0.512982	0.953756	0.0238689
B4GALNT4	0.874167	0.777891	0.982358	0.023887
ZBED1	0.700285	0.514012	0.954062	0.0239443
TIFAB	0.895068	0.812933	0.985502	0.0239859
B9D1	0.814768	0.681996	0.973389	0.023999
MIOS	1.45128	1.05022	2.00549	0.0240165
SRD5A3	1.24821	1.02953	1.51332	0.0240606
CISH	0.858935	0.752634	0.98025	0.024077
ZNF204P	0.88869	0.802089	0.984641	0.0240802
USP26	1.21405	1.02572	1.43696	0.024116
BCL2	0.886821	0.79891	0.984405	0.0241297
C7orf57	0.855347	0.74672	0.979775	0.0241442
PLXND1	1.30211	1.03507	1.63804	0.0241768
PDZK1P1	0.896929	0.815987	0.9859	0.0241813
RPL13A	0.783828	0.634216	0.968733	0.0242008
GPR137B	1.2556	1.03013	1.53043	0.0242041
SLAMF7	0.897576	0.817071	0.986014	0.0242128
STRAP	1.4032	1.04512	1.88396	0.0242236
CDC23	1.56042	1.05967	2.29779	0.0242277
JUN	0.838813	0.719888	0.977384	0.0242459
RASGRP1	0.897784	0.817382	0.986095	0.0242915
PPIB	0.747848	0.5807	0.963109	0.0243731
ERP27	0.904132	0.828157	0.987077	0.0244218
PARG	1.42156	1.04639	1.93125	0.0244485
GEMIN8P4	0.805278	0.666821	0.972483	0.0244594
ANAPC11	0.783575	0.633577	0.969085	0.0244726
C11orf49	0.750902	0.58503	0.963803	0.0244836
PIK3CD	0.849788	0.737401	0.979303	0.0245172
ADAM29	0.868926	0.768767	0.982134	0.0245459
MMP25	0.888675	0.80179	0.984975	0.0245531
GMIP	0.754804	0.590656	0.96457	0.0245582
ABO	0.896586	0.815191	0.986108	0.024572
TGIF1	0.73026	0.555184	0.960545	0.0245888
A4GALT	0.84909	0.736215	0.979271	0.0245905
LTF	0.949675	0.907862	0.993414	0.0246036
CAPN6	0.937591	0.886349	0.991795	0.0246228
ZNF575	0.749906	0.583435	0.963876	0.0246243
C2CD2	1.2626	1.03022	1.54741	0.0246529
SAMD3	0.896481	0.814943	0.986177	0.0247003
TMEM98	0.867398	0.766096	0.982095	0.0247613
C7orf33	1.27838	1.03165	1.58411	0.0247801
AKAP8L	0.747988	0.580478	0.963837	0.0247872
TMEM69	0.691202	0.500667	0.954247	0.0247942
PCDHGA3	1.1493	1.0178	1.2978	0.0248019
FBXO27	0.880445	0.787764	0.98403	0.0248553
ZNF222	0.776093	0.6219	0.968516	0.0248941
CHST9	0.923007	0.86058	0.989961	0.024939
HLA-DMA	0.838979	0.719605	0.978156	0.024961
CCL22	0.888705	0.801603	0.985271	0.0249676
DZIP1L	0.839478	0.720383	0.978263	0.0249936
GTF2IRD2B	0.813649	0.679372	0.974465	0.0250226
GYPC	0.837078	0.716471	0.977987	0.0250664
SFTPA1	0.698766	0.510575	0.956322	0.0251603
HLA-DRB1	0.873187	0.775444	0.983251	0.0251667
FIS1	0.738007	0.565645	0.962892	0.0251819
RTN1	0.903116	0.826021	0.987406	0.0251979
DMRTC1B	0.898627	0.818323	0.986812	0.0252258
CCL25	0.820329	0.689669	0.975743	0.025262
OR56A3	1.14163	1.01654	1.28212	0.0252857
GLUL	0.832358	0.708668	0.977637	0.025384
ZNF485	1.28454	1.03129	1.59998	0.0254209
CDK19	1.23701	1.02645	1.49076	0.0254715
SYN2	0.910313	0.838276	0.98854	0.0254837
MED18	1.49489	1.05051	2.12725	0.0255009
TCTN2	0.788816	0.640573	0.971365	0.0255159
NR0B1	0.859169	0.751941	0.981688	0.0256358
NDRG1	1.14613	1.01674	1.29197	0.0256379
ASAH2	1.17436	1.01975	1.3524	0.0256438
NT5DC3	0.768397	0.609671	0.968449	0.0256464
VBP1	1.45439	1.04653	2.02119	0.0256928
BTN3A1	0.805466	0.666037	0.974083	0.0256991
TAS2R19	0.782691	0.631095	0.970703	0.0257024
CYP3A7	1.29888	1.03222	1.63443	0.0257158
TAF2	1.25731	1.02811	1.5376	0.0257494
EIF4EBP1	1.16139	1.01819	1.32474	0.0258554
SLC1A1	0.928788	0.870354	0.991144	0.0258632
C2orf15	0.809658	0.672383	0.97496	0.0259143
TCTE1	0.83643	0.714775	0.97879	0.025927
RDH5	0.881477	0.788845	0.984986	0.0259468
CD163L1	1.11838	1.0135	1.23411	0.025958
ZNF326	0.689582	0.497177	0.956446	0.0259633
MEF2B	0.882349	0.790274	0.985152	0.0260139
VWA3A	0.893877	0.809797	0.986686	0.0260208
PLA2G10	0.912629	0.842039	0.989138	0.0260228
CCDC9	0.79868	0.65525	0.973506	0.0260249
ANKRD46	1.27889	1.02981	1.58822	0.0260313
ULBP1	1.10358	1.01183	1.20364	0.0260385
GSN	0.810626	0.673755	0.975301	0.0260807
NENF	0.788216	0.63913	0.972077	0.026101
DCD	1.05352	1.00621	1.10306	0.0261487
PAK6	1.15436	1.01719	1.31004	0.0261508
SRP54	1.41089	1.04156	1.91117	0.0262196
ORAI2	0.759353	0.595681	0.967996	0.0262444
RAB13	0.744246	0.57354	0.965761	0.0262802
PGRMC2	1.35451	1.03639	1.77027	0.026305
SMAD5	1.3837	1.03898	1.84279	0.0263165
TBL1X	1.27818	1.02917	1.58742	0.0264148
SLC1A4	0.840236	0.720535	0.979822	0.0264236
IFI35	0.843555	0.72589	0.980293	0.0264428
SYF2	0.654481	0.4501	0.951669	0.0264656
AMY2A	0.836289	0.714126	0.97935	0.0264908
TRIM42	2.95519	1.13462	7.69698	0.0265172
RBP1	0.904213	0.827236	0.988353	0.0265532
CXCL5	0.909014	0.835502	0.988995	0.026612
CROCC	0.841769	0.722834	0.980272	0.0266683
ZNF525	1.29947	1.03061	1.63847	0.0267656
NME5	0.924079	0.861706	0.990966	0.0267955
CCDC34	0.793001	0.645813	0.973736	0.0268264
HSCB	0.743111	0.571344	0.966517	0.0268355
FAM71E2	0.873128	0.774307	0.984561	0.026839
CCDC12	0.782249	0.629358	0.972283	0.026878
AMPH	0.906719	0.831365	0.988902	0.0269614
SEMA3G	0.875487	0.778167	0.984979	0.0269873
VPREB3	0.897744	0.815894	0.987806	0.0270009
EN2	1.08901	1.00974	1.17451	0.0270227
CDRT4	0.779719	0.625364	0.972173	0.0270561
CTRC	0.646124	0.4386	0.951838	0.0271266
HMGB3	1.1671	1.01761	1.33855	0.0271358
INO80B	0.833015	0.708347	0.979624	0.0271854
NCOA2	1.15172	1.016	1.30557	0.0272385
CHMP2B	1.42243	1.04039	1.94477	0.0272387
PHF1	0.729101	0.550783	0.965151	0.0272554
AKNAD1	1.19689	1.02032	1.404	0.0273115
GBP4	0.891075	0.80433	0.987175	0.0273155
ADORA1	0.898562	0.817135	0.988104	0.027322
C6orf47	0.736602	0.561459	0.966381	0.0273261
ITPK1	0.781321	0.627536	0.972793	0.0273402
INE2	0.906428	0.83066	0.989108	0.0273928
GGT7	0.839877	0.719223	0.980772	0.0274304
RPL23P8	0.830548	0.704167	0.979611	0.0274856
OR51E2	1.15645	1.01621	1.31606	0.0275467
FXYD2	0.855514	0.744635	0.982903	0.0275626
PTCD2	1.38479	1.0366	1.84994	0.027578
DHX40P1	1.16134	1.01658	1.32671	0.0276572
AHI1	1.29317	1.02859	1.62581	0.027711
JAK3	0.876518	0.779464	0.985658	0.0277192
ITIH1	0.783936	0.631141	0.973722	0.0277567
HSD17B8	0.857488	0.747747	0.983335	0.0277721
ALDH1A1	0.883484	0.791179	0.986559	0.0277845
CCDC106	0.83952	0.718383	0.981084	0.0277947
CLDN18	0.79482	0.647706	0.975349	0.0278795
TTC19	1.38829	1.03629	1.85986	0.0278882
IQCC	0.758259	0.592442	0.970485	0.0279554
CDK8	1.23745	1.02333	1.49637	0.0279582
RORB	1.11302	1.01166	1.22455	0.0279617
PHGR1	0.922017	0.857615	0.991255	0.0279688
JPH1	1.12319	1.01264	1.24581	0.027976
LARP4	1.34654	1.03259	1.75595	0.0280387
MIER1	0.719721	0.536685	0.965182	0.0280448
OSBPL10	1.26436	1.02556	1.55877	0.0280704
IGFBP4	0.863345	0.757181	0.984393	0.0281687
GLRA3	0.93171	0.874671	0.992467	0.0281954
CALY	0.817653	0.683097	0.978713	0.0281982
TBR1	0.771768	0.612348	0.972691	0.0281989
IKZF1	0.876661	0.779421	0.986031	0.0282014
CCR9	0.779087	0.623378	0.973691	0.028212
C1QTNF4	0.877036	0.780045	0.986087	0.0282152
CLIP3	0.81664	0.681407	0.978711	0.0283124
TSHR	0.862952	0.756418	0.984489	0.0283443
TF	0.933486	0.877776	0.992732	0.0283584
F11R	1.37177	1.03403	1.81983	0.028378
TSPAN10	0.893285	0.807541	0.988134	0.0283926
TM4SF4	1.14119	1.01405	1.28427	0.0284206
PCDHGB3	1.13629	1.01358	1.27384	0.0284246
HPS4	0.680806	0.482688	0.96024	0.0284382
ARRDC5	0.839122	0.717254	0.981697	0.0284746
PPP3CC	0.760954	0.595933	0.97167	0.0284959
HHIPL2	1.0745	1.00759	1.14586	0.0285019
GNA11	1.30193	1.02799	1.64886	0.0285952
HOTAIR	1.06811	1.00692	1.13302	0.0285982
ACER1	1.15655	1.01532	1.31742	0.0286132
ABCB1	0.90005	0.819055	0.989054	0.0286165
PZP	0.809986	0.670645	0.978278	0.0286714
BLVRA	0.822525	0.690446	0.979871	0.0286951
TNFRSF6B	0.865675	0.76072	0.985111	0.0287098
CD3G	0.912057	0.839848	0.990475	0.0287142
FADS3	0.80469	0.662311	0.977678	0.028729
PRF1	0.898565	0.81644	0.988952	0.0287327
POLR1D	0.666807	0.463715	0.958848	0.0287633
DHX58	0.826368	0.696524	0.980418	0.0287636
APOH	1.23561	1.02217	1.49361	0.0287714
KDM6A	1.30942	1.02832	1.66735	0.0287789
IRS2	0.868255	0.764962	0.985495	0.0288114
CDK11A	0.818161	0.683414	0.979476	0.0288286
NKX2-2	1.07109	1.00708	1.13917	0.0289294
RAD50	1.3107	1.02819	1.67084	0.0289298
SPRY2	0.857069	0.746273	0.984315	0.0289764
MKRN1	0.627527	0.413044	0.953386	0.0289867
ACOT4	0.874329	0.775038	0.986341	0.0289932
SCRN1	1.17398	1.01655	1.3558	0.0290082
LRRC61	0.817206	0.681753	0.979573	0.0290228
C11orf1	0.806881	0.665461	0.978355	0.0290694
WDR49	0.841334	0.720414	0.98255	0.0290851
HPGD	0.924496	0.861551	0.992039	0.0290998
TP53I3	0.805389	0.663016	0.978335	0.0292093
TMEM233	1.20402	1.01894	1.42272	0.0292368
ZFAND1	1.31591	1.02811	1.68426	0.0292472
ITM2C	0.862859	0.755685	0.985233	0.0292704
FITM1	0.839405	0.717143	0.98251	0.0292834
CNPY3	0.743482	0.569517	0.970585	0.0292949
C17orf107	0.868862	0.76566	0.985975	0.0293395
PRKCQ	0.905487	0.828121	0.99008	0.0293504
TAT	0.948968	0.905287	0.994756	0.0293562
CADM3	0.92289	0.858614	0.991978	0.0293579
ZBTB32	0.861385	0.753169	0.98515	0.0293771
SECISBP2L	1.27166	1.02436	1.57866	0.0294021
GREB1	0.928032	0.867704	0.992555	0.0294151
OMA1	0.718987	0.534201	0.967692	0.0295077
APOA2	1.22924	1.02074	1.48033	0.0295199
FFAR2	1.1009	1.00959	1.20047	0.0295456
DDB2	0.760239	0.593896	0.973173	0.0295698
CD83	0.829208	0.700471	0.981605	0.029582
SETD7	1.29235	1.02574	1.62825	0.0295902
NPC2	0.798624	0.652152	0.977992	0.0296121
RPS4X	0.776254	0.617864	0.975246	0.0296123
SMARCA5	1.39313	1.03332	1.87824	0.0296318
ZNF473	1.37333	1.03175	1.82801	0.0296936
KLRG1	0.857222	0.746036	0.984978	0.0297425
DNAJC30	0.723113	0.539814	0.968655	0.0297443
GALNTL5	1.6257	1.04883	2.51985	0.0297659
REM2	0.870703	0.768484	0.986518	0.0297802
DIP2C	1.35191	1.02992	1.77458	0.0298285
SNCAIP	0.895794	0.811111	0.989318	0.0298617
RP1	0.921296	0.8556	0.992037	0.0298735
MYO15A	0.856272	0.744363	0.985006	0.029903
TAF1L	1.21373	1.01898	1.44571	0.0299531
RPL10	0.744174	0.569895	0.971751	0.0299721
KCNRG	0.814882	0.677345	0.980345	0.0299747
HOXC13	1.08687	1.00807	1.17183	0.0300519
TRAPPC10	1.42065	1.03445	1.95104	0.0300676
DNASE1L3	0.910925	0.837253	0.99108	0.0301429
DCDC2B	0.750336	0.578739	0.97281	0.0301561
APOL4	0.896392	0.811996	0.989559	0.0301582
KRTAP5-9	0.848545	0.731429	0.984413	0.0302141
SAMD10	0.792448	0.642093	0.97801	0.0302269
SNX18	1.37142	1.03064	1.82488	0.0302332
LYZL2	1.14145	1.01271	1.28656	0.030255
PAQR8	0.818583	0.682965	0.981132	0.0303048
KIF17	0.840767	0.718649	0.983636	0.0303098
CYP1B1	0.884614	0.791722	0.988405	0.0303113
HLA-DPB1	0.865155	0.758875	0.986321	0.0303168
ZSCAN12P1	1.17742	1.01564	1.36495	0.0303254
CBX5	1.34013	1.02804	1.74696	0.0304323
NCR1	0.801543	0.656028	0.979335	0.0304446
PCDHA9	1.13528	1.01201	1.27357	0.0305024
TMEM184C	1.4158	1.03313	1.94019	0.030562
FUT7	0.888896	0.798898	0.989032	0.0305833
RAB34	0.840553	0.718113	0.98387	0.0305869
ETF1	1.55098	1.0419	2.30878	0.030604
CRYZ	0.804082	0.659867	0.979816	0.030607
AMBRA1	0.633487	0.418769	0.958298	0.0306442
IQSEC1	1.39483	1.03153	1.88609	0.0306494
SYT2	0.83663	0.711664	0.98354	0.0306924
KCTD15	1.22423	1.01896	1.47084	0.0307304
POU5F1	0.859896	0.749845	0.986099	0.0307483
LAMC2	0.920009	0.852984	0.992299	0.0307516
BBOX1	0.93908	0.887024	0.994191	0.0307565
OR8J3	29.4314	1.36797	633.204	0.0307662
UBR5	1.28733	1.02365	1.61894	0.0307851
AATK	0.869197	0.765363	0.987118	0.0307946
LCK	0.910381	0.836014	0.991364	0.0308159
PPP1R14D	1.13383	1.01164	1.27079	0.0308589
FAM172A	1.34014	1.02722	1.7484	0.0309375
DSG2	0.84232	0.720752	0.984392	0.0309455
SCARNA17	0.832368	0.704543	0.983383	0.0310092
HS3ST4	0.905913	0.828092	0.991048	0.0310683
JPH3	1.10385	1.00902	1.20758	0.0310839
NME2	0.78154	0.624642	0.977849	0.031093
CDC20B	0.939312	0.887339	0.99433	0.0311015
PPP1R15A	0.800147	0.653313	0.979981	0.0311262
MOV10	0.727967	0.545409	0.971629	0.0311351
HBBP1	0.238699	0.064867	0.878368	0.0311569
ECEL1	0.913563	0.841454	0.991851	0.0311612
MRGPRG	267.885	1.65715	43304.5	0.0311906
CXCR5	0.907759	0.831257	0.991301	0.0312025
RARRES1	0.918061	0.849361	0.992318	0.0312172
SPN	0.880944	0.784947	0.988682	0.0312941
NUAK2	0.83491	0.70845	0.983944	0.0313097
PIGF	1.44197	1.03324	2.01239	0.0313785
RPS15A	0.749067	0.575763	0.974536	0.0313902
LRIT2	0.672519	0.468581	0.965216	0.0313966
ZNF683	0.911554	0.837809	0.991791	0.0314393
DMD	0.894572	0.80823	0.990137	0.0314477
PHKA1	1.26502	1.02113	1.56715	0.0314502
SCUBE2	0.945437	0.898299	0.995048	0.0315401
CCL23	0.86159	0.752159	0.986942	0.0315847
ANKS4B	1.207	1.01672	1.43289	0.0316063
OR52K1	2.92372	1.09899	7.77822	0.0316318
LIN28A	1.07375	1.00627	1.14575	0.0316475
HLA-DQA1	0.894242	0.80755	0.990241	0.0316772
TMEM160	0.839338	0.715389	0.984763	0.0316898
PRMT6	0.783565	0.62724	0.978851	0.0316947
CDH19	0.914781	0.843383	0.992224	0.0316953
SLC38A2	1.3415	1.02606	1.75392	0.0317065
RPS3A	0.7448	0.569198	0.974576	0.0317392
KRCC1	0.752121	0.579947	0.97541	0.0317396
SERAC1	1.32408	1.02481	1.71074	0.0317571
BCL7B	0.640439	0.426427	0.961858	0.0317639
NME6	1.49737	1.03583	2.16457	0.0317763
CPO	1.16988	1.01377	1.35003	0.0317848
RPL24	0.761286	0.593477	0.976545	0.031811
PRKD2	0.71075	0.520374	0.970774	0.0318386
MTM1	1.36041	1.02698	1.80209	0.0319079
PLCL1	0.893387	0.805947	0.990314	0.0319385
TAP1	0.858908	0.747455	0.98698	0.0319714
ZNF276	0.793818	0.642793	0.980326	0.0319919
TBPL1	1.35334	1.02636	1.78449	0.0320024
CASD1	0.838089	0.713097	0.984991	0.0320737
KIAA0040	0.860792	0.75053	0.987254	0.0320818
TSNAXIP1	0.871327	0.768194	0.988307	0.0321167
SPRR4	1.2662	1.0203	1.57137	0.0321642
SDHA	1.39579	1.0287	1.89387	0.0322159
TAF10	0.756895	0.586576	0.976668	0.0322357
SGCE	0.883745	0.789227	0.989583	0.0322412
TFF1	0.963016	0.930358	0.99682	0.0322814
NEDD9	0.849694	0.731963	0.986361	0.0323196
IRF4	0.917168	0.847334	0.992759	0.0323692
GABRP	0.955384	0.916265	0.996172	0.0323751
CNDP1	0.836812	0.710809	0.985152	0.0323856
HHLA3	0.81434	0.674667	0.98293	0.0324106
FBXW11	1.38254	1.02743	1.86038	0.0324642
OGFRL1	0.839415	0.714977	0.985512	0.0324978
NFKBIZ	0.895095	0.808632	0.990803	0.0324983
IGSF10	0.909422	0.833606	0.992133	0.0325326
ZNF562	1.33199	1.02413	1.73241	0.0325378
POM121L9P	0.873996	0.772467	0.988869	0.0325478
NR3C2	0.878042	0.779332	0.989256	0.0325573
IFI27L2	0.848568	0.729934	0.986484	0.0325927
TRMT12	1.28803	1.02111	1.62474	0.0326568
DLGAP1	0.929599	0.869355	0.994018	0.0327218
IRF7	0.857876	0.745274	0.987492	0.032737
DYDC2	0.909973	0.834466	0.992312	0.032795
VWA5B2	1.09263	1.00727	1.18523	0.0328081
SLC17A5	1.30926	1.02224	1.67686	0.0328265
HLA-G	0.900998	0.818731	0.991531	0.0328379
TCF7L2	0.833868	0.705698	0.985318	0.0328693
CD244	0.877242	0.777769	0.989437	0.0329333
MICB	0.867332	0.760993	0.988531	0.0329394
USP9X	1.3474	1.02446	1.77215	0.032941
B3GALT4	0.823446	0.68879	0.984426	0.0329855
ALDH1A2	0.904823	0.825339	0.991962	0.0330072
OFD1	0.722899	0.536423	0.9742	0.0330331
SRGN	0.856766	0.743222	0.987656	0.0330727
CENPI	1.12624	1.00956	1.25641	0.0331346
PARVG	0.85403	0.738632	0.987456	0.0331388
RIC3	0.922704	0.856846	0.993625	0.0332339
CCL17	0.901714	0.81978	0.991838	0.0332892
SERPING1	0.846311	0.725765	0.986879	0.0333012
XIAP	1.42673	1.02848	1.97919	0.0333292
BTBD17	1.26141	1.0185	1.56224	0.0333405
XPNPEP3	1.333	1.02295	1.73702	0.0333412
TNFAIP2	0.849121	0.730359	0.987194	0.0333676
HCN2	1.10163	1.00765	1.20437	0.033384
YWHAZ	1.26655	1.01877	1.57461	0.0333908
MPST	0.821411	0.685239	0.984643	0.0333945
VAPB	1.33399	1.02291	1.73967	0.033404
SQLE	1.17109	1.01247	1.35455	0.0334286
ALG3	1.29478	1.0204	1.64293	0.0334893
ARL4D	0.862721	0.752914	0.988543	0.0335147
AGPAT1	1.52835	1.03348	2.26017	0.0335912
TRIM67	1.08823	1.00658	1.1765	0.0336004
ODF3B	0.860735	0.74953	0.988439	0.0336107
FCRL1	0.907987	0.830629	0.99255	0.0336229
RPF1	0.665161	0.456585	0.969018	0.0336778
IGFBPL1	0.891611	0.802026	0.991203	0.0337102
ITGB7	0.886125	0.792561	0.990735	0.0337156
ZHX1	1.26268	1.01807	1.56605	0.0337578
LMBRD2	1.17073	1.01212	1.35418	0.0338208
PGLYRP2	0.944439	0.895851	0.995661	0.033895
FKBP2	0.859491	0.747275	0.988559	0.033908
SAA2	0.936579	0.881551	0.995042	0.0339341
ESRP1	1.27276	1.01846	1.59055	0.0339373
RAMP3	0.889268	0.797851	0.991159	0.033971
WTIP	0.855	0.739734	0.988228	0.0339864
EMP3	0.827025	0.69386	0.985748	0.0339884
SLA2	0.901724	0.819487	0.992213	0.0339901
KRTAP19-5	21.2403	1.25919	358.287	0.03402
LRRC19	0.815423	0.675221	0.984738	0.0340282
ITPRIPL1	0.886747	0.793455	0.991008	0.0340721
SORBS3	0.804497	0.657879	0.983792	0.0340781
HAND1	1.18784	1.01299	1.39287	0.0341061
SFI1	0.789822	0.63495	0.982468	0.0341079
HEPN1	0.896913	0.811027	0.991894	0.0341381
UNC13B	1.26083	1.01742	1.56247	0.0341941
TMEM181	1.23529	1.01578	1.50223	0.0342754
FGR	0.853519	0.737061	0.988379	0.0343331
EPHB6	0.910026	0.833923	0.993074	0.0343496
BFSP2	0.885573	0.791283	0.991099	0.0343779
NKAIN1	0.942056	0.89137	0.995624	0.0343962
PRKAG3	1.11398	1.00794	1.23117	0.0344375
ZNF468	1.31204	1.02007	1.68758	0.0344554
SYNE2	0.79758	0.646737	0.983605	0.0344715
KCTD10	1.55844	1.03295	2.35126	0.0344777
EIF3H	1.26481	1.0173	1.57254	0.0344891
AMN1	0.797639	0.646794	0.983663	0.0345175
DMRTB1	1.3824	1.02375	1.8667	0.0345894
SNX1	0.747616	0.570809	0.979189	0.0346246
CASP4	0.814971	0.674072	0.985322	0.0346307
G3BP1	1.41627	1.02541	1.9561	0.0346628
NUMBL	0.786162	0.628796	0.982911	0.0347534
FSCN2	0.879245	0.780193	0.990872	0.0348297
ZNF133	0.771294	0.605981	0.981703	0.0348579
CCDC81	1.18287	1.01197	1.38263	0.034907
PCDHB16	1.12775	1.00855	1.26104	0.0349123
ANXA10	0.75343	0.579131	0.980186	0.0349408
PKN3	0.828912	0.696208	0.986909	0.0350307
SPRY4	1.25057	1.01572	1.53973	0.035127
TJAP1	0.70739	0.512578	0.976244	0.0351825
TCL1A	0.925886	0.861858	0.994671	0.0351961
TREML2	0.880675	0.782381	0.991319	0.0353471
XCR1	0.869875	0.763942	0.990496	0.0353699
PLAT	0.907105	0.82834	0.99336	0.0354031
PDCD7	0.62097	0.398356	0.967988	0.0354126
CCDC88B	0.87458	0.771885	0.990939	0.0354842
ZNF611	1.30063	1.01798	1.66175	0.0355078
IL1RN	0.885254	0.790177	0.991771	0.0355084
RPS17	0.786576	0.628803	0.983936	0.0355759
METTL2A	1.32364	1.01909	1.71919	0.0355763
APOL1	0.863075	0.752316	0.99014	0.0356082
PRKG1	1.11595	1.00741	1.23618	0.0356123
PNKP	0.780596	0.619551	0.983503	0.0356354
GDPD2	1.08685	1.00561	1.17465	0.0356402
C11orf16	0.885642	0.790775	0.991889	0.0356537
PRIM1	1.25785	1.01547	1.55809	0.0356862
ADAMTS12	1.11053	1.00703	1.22467	0.0357085
TRIM34	0.816907	0.676407	0.986592	0.0357157
ETV6	0.776784	0.613637	0.983307	0.0357367
ACADL	0.910492	0.834159	0.993809	0.0358201
SRF	0.750605	0.574205	0.981197	0.0358313
TMEM115	0.723807	0.535158	0.978956	0.0359041
SLC2A10	1.14126	1.0087	1.29123	0.0359454
PDE6G	0.862524	0.751194	0.990354	0.0359552
GRAP2	0.891814	0.801316	0.992533	0.0359707
SLC25A43	1.30191	1.01734	1.66609	0.0360338
SERPINB5	0.941478	0.889869	0.99608	0.0360372
ZFHX3	1.21891	1.01297	1.46671	0.0360426
NCAPD3	1.26972	1.01566	1.58734	0.0360515
TTC3	1.32974	1.01867	1.73579	0.03608
CCNJL	0.886932	0.792788	0.992256	0.0361041
SLC35E1	1.43586	1.02365	2.01407	0.0361413
MANBAL	0.706884	0.510958	0.977937	0.0361993
OPA1	1.37383	1.02062	1.84929	0.0362109
LRFN5	0.891753	0.80109	0.992678	0.0362321
PPM1L	1.15702	1.00937	1.32627	0.0362738
ADH7	0.768242	0.600226	0.983289	0.0362781
PBX3	0.841863	0.716572	0.98906	0.0362812
RNF220	0.72388	0.534926	0.979578	0.036291
IL5RA	0.836338	0.707475	0.988673	0.0363142
DBX2	0.877413	0.776288	0.991712	0.0363342
PTPN22	0.887953	0.794392	0.992533	0.036448
TBX21	0.90525	0.824634	0.993748	0.0364603
FBXO45	1.30301	1.01681	1.66977	0.0364622
MGC16275	0.783789	0.623803	0.984806	0.0364917
ARL6IP4	0.813999	0.671214	0.987159	0.0365011
MAN2B1	0.787188	0.629044	0.985089	0.0365049
LZTS2	0.766278	0.597077	0.983426	0.0365053
RND2	0.908055	0.829529	0.994014	0.0366115
IL17RB	0.869437	0.762472	0.991408	0.0367268
PITRM1	1.32226	1.01735	1.71855	0.036744
VGF	1.08386	1.00491	1.169	0.0368884
KCNB2	0.883272	0.786062	0.992503	0.0369375
RGS14	0.850643	0.730706	0.990266	0.0369686
STAG3	0.880571	0.781378	0.992356	0.0369959
MAPK1IP1L	0.643986	0.425816	0.973935	0.0370603
CDON	0.875988	0.773468	0.992097	0.0370778
AKAP14	0.846998	0.724573	0.990108	0.03709
SGPP1	0.864272	0.753495	0.991335	0.0371308
LARP4B	1.37274	1.01908	1.84914	0.0371319
RPL35	0.810378	0.664975	0.987574	0.0371704
ARCN1	1.43667	1.02173	2.02012	0.0371996
ARPP21	0.868127	0.759962	0.991686	0.0372576
HCLS1	0.858204	0.743171	0.991044	0.037298
POLR2I	0.762677	0.590989	0.984243	0.0373405
RPL22	0.733606	0.547988	0.982097	0.0374027
JUNB	0.854789	0.737347	0.990937	0.0374612
OR5D18	17.6303	1.18101	263.188	0.0374713
CATSPERG	0.880526	0.781054	0.992666	0.037497
ANXA5	0.739582	0.556594	0.982731	0.0375182
PNMA3	0.912963	0.83788	0.994774	0.0375588
PICK1	0.791759	0.635261	0.986812	0.0376986
SYTL1	0.855425	0.738269	0.991174	0.0377151
PMPCB	0.652184	0.435789	0.976031	0.037718
UBFD1	1.37501	1.01818	1.8569	0.037754
XKR9	1.09157	1.00497	1.18563	0.0377599
SLC5A12	1.08823	1.00475	1.17865	0.0378581
RNF26	1.46909	1.02169	2.11241	0.0379179
ARHGAP25	0.856682	0.740249	0.991427	0.0379417
AASDHPPT	1.36852	1.01761	1.84044	0.0379449
FUCA2	1.32703	1.01584	1.73355	0.037968
MRPL23	0.809036	0.662184	0.988454	0.0381165
SLC43A2	0.823281	0.685042	0.989415	0.038132
RPGRIP1	0.844091	0.719107	0.990797	0.038168
IFI27L1	0.828304	0.69316	0.989797	0.0381897
NRG2	0.912015	0.835947	0.995005	0.0382047
KRT80	1.12752	1.00653	1.26306	0.0382371
SLC31A1	1.30877	1.01469	1.68808	0.0382377
FASTKD3	1.42356	1.0193	1.98817	0.0382556
HMGCLL1	0.919966	0.850155	0.99551	0.0382908
CTRL	0.858819	0.743632	0.991848	0.0383246
ASPSCR1	0.797325	0.643492	0.987934	0.0383625
S1PR2	0.786828	0.627016	0.987372	0.0384829
RGS2	0.892007	0.800488	0.993989	0.038535
NDUFA5	0.717176	0.523434	0.982628	0.0385429
GALK2	1.31659	1.01459	1.70849	0.0385534
BRMS1L	1.34308	1.01565	1.77605	0.0385543
TM2D2	1.20016	1.00959	1.42669	0.0386227
MYLK3	1.12239	1.00605	1.25218	0.0386434
RFX5	0.742611	0.560088	0.984615	0.038669
PCDHB3	1.10456	1.00519	1.21376	0.038674
TEKT4	0.876486	0.773469	0.993222	0.0387747
RNF168	1.18746	1.00888	1.39764	0.0388053
PRICKLE4	0.887797	0.793015	0.993908	0.0388236
ST6GALNAC4	1.18524	1.00876	1.39258	0.038825
CD1A	0.926671	0.862057	0.996129	0.0389104
PCSK2	1.06522	1.00321	1.13106	0.0389425
WAC	1.43692	1.01855	2.02715	0.0389576
NPFFR1	0.693921	0.490522	0.981661	0.0389662
PITPNM3	1.14177	1.00666	1.29502	0.0390922
PRAME	1.04095	1.00201	1.08141	0.0391053
CAMK2N2	1.12644	1.00596	1.26136	0.0391199
TSPYL2	0.791616	0.633928	0.988529	0.0392305
LSS	1.27938	1.01217	1.61715	0.0392893
KIR2DL4	0.883082	0.784603	0.993922	0.0393005
EPHA1	0.80861	0.660696	0.989638	0.0393015
PPM1M	0.769766	0.60019	0.987252	0.0393017
ALG11	1.22013	1.00974	1.47435	0.039363
HLA-DRA	0.870324	0.762607	0.993256	0.0393655
GPX1	0.791611	0.633703	0.988867	0.0395337
IDO1	0.931635	0.870872	0.996637	0.0396053
TWIST2	0.889311	0.795281	0.994459	0.0396462
ETV7	0.896878	0.808546	0.994859	0.039648
GRB10	1.24939	1.01059	1.54462	0.0396538
TXNRD1	1.2302	1.00983	1.49865	0.0396747
DCP1B	0.744144	0.561531	0.986143	0.0396773
SLC25A35	0.838186	0.708399	0.991751	0.0397375
TRPV3	1.10537	1.0047	1.21613	0.0397563
SLC38A7	1.27819	1.01156	1.61511	0.0397578
PRKAA2	0.92737	0.863053	0.996479	0.0397683
FRG2B	1.19582	1.00838	1.41811	0.039788
MASTL	1.22688	1.00957	1.49096	0.0398115
AIMP2	1.3717	1.01476	1.85419	0.0398574
GPR153	0.841754	0.714229	0.992048	0.039858
BAG1	0.807193	0.658057	0.990127	0.0398632
PSMD14	1.38566	1.0152	1.89131	0.039881
KIF21A	1.19041	1.00807	1.40574	0.039908
PKHD1	0.907198	0.826709	0.995522	0.039914
MTHFR	0.827117	0.690104	0.991332	0.0399587
RPS14	0.780611	0.616312	0.988708	0.0399616
FBXO34	0.677937	0.467857	0.982347	0.0399675
CYP4F3	0.915897	0.842238	0.995998	0.0400031
RCL1	0.749928	0.56983	0.986949	0.0400032
DIO3OS	0.808369	0.659757	0.990457	0.0401231
GTF2IRD2P1	0.793109	0.635603	0.989647	0.0401606
TCEAL2	0.90366	0.820317	0.99547	0.0401773
ITGAL	0.889076	0.794624	0.994755	0.0401958
ATN1	0.719498	0.525351	0.985395	0.040203
CLECL1	0.879431	0.777841	0.994289	0.0402263
OTOR	1.10273	1.00436	1.21073	0.0402377
GSTO1	0.719311	0.525049	0.985446	0.0402432
MID2	1.25833	1.01027	1.56729	0.0402463
GRINA	1.26109	1.01028	1.57418	0.0403293
CD37	0.871342	0.763809	0.994015	0.0404336
GPLD1	0.884538	0.786603	0.994666	0.0404339
WNT5A	0.896894	0.80823	0.995284	0.0404643
SLC6A19	1.26029	1.01008	1.57248	0.0404812
PGAM1	1.44676	1.01612	2.05989	0.0404929
CCNI2	0.906101	0.82452	0.995755	0.0405273
AMH	1.08958	1.00368	1.18283	0.0405939
MYOC	0.879551	0.77786	0.994537	0.0406235
LAX1	0.915945	0.842084	0.996284	0.0406825
NXPH4	1.08699	1.00354	1.17738	0.0406881
ZNF655	0.83645	0.70494	0.992495	0.0407282
MORN1	0.877451	0.774159	0.994526	0.0407693
CACNA1E	0.872453	0.765541	0.994295	0.0407814
ABHD1	0.882283	0.782497	0.994793	0.0408343
GDI2	1.35408	1.01266	1.8106	0.0408727
TBCEL	1.32089	1.0116	1.72474	0.0408864
NKX2-3	1.12855	1.00498	1.26732	0.040961
HLTF	1.2466	1.00909	1.54001	0.040966
GRPEL1	1.40627	1.01394	1.95041	0.0410636
TRANK1	0.833973	0.700626	0.992699	0.0411119
CSMD2	1.11453	1.00438	1.23676	0.041126
ZFP36L2	0.83299	0.698995	0.99267	0.0411334
CTXN3	0.704847	0.503834	0.986057	0.0411582
UBR1	1.25626	1.00918	1.56384	0.0411764
LY6G5C	0.83682	0.705237	0.992954	0.041253
DPYSL5	1.06689	1.00257	1.13534	0.0412536
SLC7A11	1.11388	1.00428	1.23543	0.0412661
RBM42	0.77921	0.613129	0.990279	0.0413665
EFCAB2	0.833435	0.699565	0.992922	0.0414025
LAMP2	1.32167	1.01091	1.72795	0.0414178
NDST4	1.08113	1.00304	1.1653	0.0414222
CHGA	0.914819	0.839793	0.996548	0.0414329
HIVEP3	0.798051	0.642481	0.99129	0.0414461
ACYP1	0.805562	0.65439	0.991657	0.0414526
TTC16	0.885422	0.787655	0.995324	0.0415024
ADPGK	0.646751	0.425358	0.983376	0.0415125
UNC93B1	1.22975	1.00794	1.50037	0.0415627
TPMT	0.745737	0.562263	0.989081	0.0417344
NSMCE2	1.28888	1.00951	1.64557	0.0417642
AMBN	1.27626	1.00907	1.6142	0.0418226
SSX2IP	0.784311	0.620694	0.991058	0.0418298
KLK1	0.900395	0.813847	0.996145	0.0418645
CAPN3	0.875448	0.770115	0.995189	0.0419815
ATP6AP1	1.31326	1.0099	1.70775	0.0420083
OR52N5	1.41777	1.01257	1.98511	0.0420819
IFITM1	0.887122	0.790355	0.995736	0.0421059
AZIN1	1.26169	1.00829	1.57876	0.0421386
IL27	1.17072	1.00559	1.36296	0.0421709
SCRT1	1.11734	1.00392	1.24358	0.0422022
ATP8A2	1.08564	1.0029	1.1752	0.0422031
IQCJ	1.1662	1.00542	1.35269	0.0422194
NUDT18	0.840632	0.710972	0.993938	0.0422449
SLC7A5	1.10754	1.00356	1.2223	0.042301
RBMY1A1	1.49672	1.014	2.20925	0.0423644
PLD4	0.909343	0.829616	0.996731	0.0423658
IRF9	0.829736	0.692889	0.99361	0.0423896
TSPAN7	0.897374	0.808271	0.9963	0.0424135
C3	0.897442	0.80838	0.996316	0.0424398
RNF183	0.930565	0.868073	0.997557	0.0424652
KRT19	0.895634	0.805162	0.996273	0.0424902
OR51E1	1.17911	1.00559	1.38259	0.0425053
STK3	1.29172	1.00866	1.65421	0.0425319
TMPRSS3	0.94109	0.887447	0.997975	0.0425951
TIRAP	1.31231	1.00911	1.70662	0.0426008
ATP13A2	0.785751	0.622333	0.992082	0.0426843
NUMA1	0.776569	0.608079	0.991744	0.0427236
UBA1	1.44299	1.01203	2.05746	0.0427614
HLA-B	0.855972	0.73639	0.994973	0.0428047
SPEF1	0.919984	0.848638	0.997328	0.0428746
BPI	0.919788	0.848279	0.997326	0.0428866
ARHGAP39	1.24225	1.00693	1.53257	0.0429288
GPR174	0.909721	0.830081	0.997002	0.0429493
UPK3A	0.912818	0.835634	0.99713	0.0429993
CYSLTR2	0.875175	0.769146	0.995821	0.0430188
ACTG2	0.932778	0.871958	0.99784	0.0430908
NAPSA	0.859145	0.74158	0.995347	0.0431673
LYSMD2	0.850004	0.726115	0.995031	0.0431825
IL24	0.900461	0.813439	0.996793	0.0431858
TMEM105	1.09382	1.00275	1.19316	0.0431893
BMP8B	1.12314	1.00353	1.257	0.0432475
RPL31P11	0.801915	0.647311	0.993444	0.0433671
SCGB1A1	0.796447	0.638637	0.993253	0.0433782
RUNX3	0.892597	0.799424	0.996629	0.0433836
WDR86	0.903807	0.819321	0.997005	0.0433976
CLTC	1.20879	1.00558	1.45307	0.0434661
CD38	0.928907	0.864723	0.997854	0.0435109
RDX	1.24084	1.0063	1.53003	0.0435123
MFSD9	1.28745	1.00734	1.64544	0.043552
TBC1D28	1.67692	1.01487	2.77085	0.0436354
FBLL1	0.917756	0.844286	0.99762	0.0438063
ZNF548	0.771272	0.599156	0.992831	0.0438201
SUN3	1.19872	1.00498	1.4298	0.0438788
BCAN	0.91558	0.840317	0.997584	0.0438811
SDCBP2	1.12821	1.00329	1.26868	0.0439245
DVL2	0.714122	0.514614	0.990977	0.0439898
GAL3ST1	0.8855	0.786662	0.996757	0.0440344
DEAF1	0.781996	0.615528	0.993484	0.0440629
SCARNA5	0.833188	0.697557	0.99519	0.0440982
ZCCHC3	0.725291	0.530527	0.991556	0.0441029
CYP4F22	0.945197	0.894717	0.998525	0.0441474
EIF2AK3	1.32514	1.0074	1.7431	0.0441477
GBP3	0.894004	0.801569	0.997099	0.0442047
ZW10	1.32405	1.00729	1.74041	0.0442132
PTPN23	0.661423	0.442163	0.989411	0.044244
PRKG2	1.10893	1.00266	1.22648	0.0442626
UGT3A2	0.907288	0.825227	0.99751	0.0442711
RPL23A	0.770734	0.597929	0.99348	0.0443816
ST8SIA6	0.933881	0.873634	0.998284	0.0443838
IDO2	0.865399	0.751612	0.996412	0.044438
[truncated: 15,060 more rows]

## Sheet: Sheet2
	lnHR	HR	CI (Low)	CI (High)	pv	adj_p
PGK1	0.615761	1.85106	1.46977	2.33127	1.67315e-07	0.00285389
PCNAP1	2.57626	13.1479	4.73308	36.5231	7.7243e-07	0.00658767
PCMT1	0.652961	1.92122	1.44602	2.55259	6.67077e-06	0.0379278
KRTAP19-1	2.20625	9.08156	3.3938	24.3016	1.11719e-05	0.0476396
TFPI2	-0.146897	0.863383	0.80825	0.922277	1.28211e-05	0.0437379
MAP2K6	-0.294104	0.745199	0.652626	0.850903	1.38875e-05	0.0394798
KLRB1	-0.18043	0.834911	0.768305	0.907292	2.10406e-05	0.0512699
TNFRSF14	-0.358418	0.698781	0.592047	0.824757	2.25328e-05	0.0480428
IRF2	-0.741613	0.476345	0.3378	0.671712	2.34485e-05	0.0444401
CEL	0.166784	1.1815	1.09242	1.27784	3.04421e-05	0.0519251
PELO	0.799504	2.22444	1.50657	3.28438	5.78709e-05	0.0897367
SERPINA1	-0.18204	0.833568	0.762578	0.911167	6.11255e-05	0.0868848
LRP11	0.423824	1.52779	1.24057	1.88151	6.63952e-05	0.0871157
TP53AIP1	-0.234176	0.791222	0.704819	0.888218	7.21526e-05	0.0879077
TCP1	0.515401	1.67431	1.29706	2.16128	7.59599e-05	0.0863766
SAV1	-0.488455	0.613574	0.481111	0.782506	8.26902e-05	0.0881529
NUP43	0.591791	1.80722	1.34566	2.4271	8.38675e-05	0.0841487
DLK2	-0.202454	0.816724	0.738229	0.903566	8.60482e-05	0.0815402
AGBL2	-0.233762	0.79155	0.704255	0.889665	8.82209e-05	0.0791991
STXBP5	0.413076	1.51146	1.2293	1.85838	8.92277e-05	0.0760978
PIGR	-0.0975479	0.907059	0.86383	0.952451	9.02785e-05	0.0733276
PARP3	-0.355143	0.701073	0.586861	0.837512	9.06411e-05	0.0702757
DEF6	-0.358735	0.698559	0.583023	0.836992	0.000100657	0.0746483
GALP	1.19783	3.31292	1.80695	6.07402	0.00010756	0.0764439
ADAMTS8	-0.180067	0.835214	0.762117	0.915322	0.000116489	0.079478
IFNK	0.812904	2.25445	1.48869	3.41408	0.000123464	0.0809969
ZNF394	-0.768292	0.463805	0.312726	0.68787	0.000133147	0.0841146
SEMA3B	-0.144887	0.86512	0.803008	0.932036	0.000138089	0.0841208
GSTM4	-0.317151	0.728221	0.618568	0.857311	0.000139574	0.0820937
IL27RA	-0.242918	0.784335	0.691874	0.889153	0.000147194	0.0836896
CEBPD	-0.256004	0.774139	0.678155	0.883709	0.000150409	0.0827591
LHX5	0.335157	1.39816	1.17523	1.66338	0.0001556	0.0829397
MORC4	0.403636	1.49726	1.21402	1.84659	0.000161594	0.0835247
C1orf226	-0.196118	0.821915	0.742204	0.910188	0.000164577	0.0825642
NFKBIA	-0.483909	0.616369	0.478728	0.793583	0.000174687	0.0851326
RAC2	-0.260369	0.770767	0.672702	0.883129	0.000176859	0.0837967
SLC16A2	0.272424	1.31314	1.13778	1.51553	0.000195333	0.0900487
APOBEC3D	-0.239288	0.787188	0.694004	0.892885	0.000197281	0.0885533
PTGES3	0.700935	2.01564	1.3923	2.91804	0.000204635	0.0894991
BEND5	-0.214667	0.80681	0.72024	0.903785	0.000209865	0.0894918
TAPBPL	-0.396139	0.672913	0.545393	0.83025	0.000219645	0.0913778
CELP	0.220166	1.24628	1.10878	1.40084	0.00022313	0.0906172
CCL19	-0.0966714	0.907854	0.862268	0.95585	0.000235234	0.0933111
DERL1	0.469416	1.59906	1.24494	2.05391	0.000237527	0.0920796
TEKT2	-0.160296	0.851892	0.781873	0.928181	0.000249189	0.0944537
LGALS2	-0.153662	0.857562	0.789844	0.931087	0.000250966	0.0930594
CYP27A1	-0.245331	0.782446	0.68597	0.892489	0.00025811	0.0936718
TMEM31	0.261448	1.29881	1.12851	1.4948	0.000266402	0.0946672
PSMB8	-0.285524	0.751621	0.644645	0.876348	0.000267431	0.0930934
MAFA	0.365133	1.44071	1.1835	1.7538	0.000273562	0.093323
RBBP8	-0.336059	0.714581	0.595983	0.85678	0.00028418	0.0950444
CD79A	-0.120694	0.886306	0.83032	0.946066	0.000288585	0.0946616
FAM166B	-0.209385	0.811083	0.724009	0.90863	0.000301978	0.0971855
ZDHHC9	0.49783	1.64515	1.25376	2.15871	0.000328875	0.103882
SPDYC	0.098196	1.10318	1.0454	1.16415	0.000346943	0.107596
FREM1	-0.148738	0.861795	0.794257	0.935075	0.000354076	0.107848
POU3F2	0.169371	1.18456	1.07943	1.29992	0.000354218	0.105998
ARMC1	0.425541	1.53042	1.21133	1.93357	0.000361148	0.106209
ADAM6	-0.11386	0.892382	0.838245	0.950016	0.000362779	0.10488
HES3	1.70694	5.51206	2.15675	14.0874	0.00036332	0.103286
DCTPP1	0.483924	1.62243	1.24335	2.11708	0.000364979	0.102056
CD24	0.18379	1.20176	1.08619	1.32963	0.000367215	0.101026
PSME2	-0.392448	0.675401	0.54411	0.838373	0.000373023	0.100994
NFE2	-0.176852	0.837903	0.760061	0.923719	0.000378044	0.100755
DAPL1	-0.155533	0.855959	0.7856	0.932619	0.000379492	0.0995846
YIPF5	0.68891	1.99154	1.3581	2.92044	0.000420193	0.108594
MCTS1	0.715884	2.04599	1.37385	3.04697	0.000426617	0.108609
XRCC4	0.64576	1.90744	1.33079	2.73394	0.000438286	0.109939
BTBD6	-0.555564	0.573748	0.420857	0.782184	0.000441935	0.109248
BIRC3	-0.189911	0.827033	0.743862	0.919503	0.000445007	0.108435
APOOL	0.315178	1.3705	1.14874	1.63507	0.000465732	0.111887
MRPL13	0.382119	1.46539	1.18254	1.81589	0.000478942	0.113463
POP1	0.32042	1.37771	1.1505	1.64978	0.000492752	0.115135
EGOT	-0.164682	0.848163	0.773125	0.930485	0.000493196	0.113682
MEI1	-0.206279	0.813606	0.724319	0.913899	0.000505137	0.114882
AK7	-0.182124	0.833498	0.752111	0.923692	0.000512525	0.115028
RAB2A	0.510956	1.66688	1.24877	2.22498	0.000524883	0.116272
TNIP1	-0.527408	0.590132	0.437963	0.795173	0.000527638	0.115384
UTP23	0.377296	1.45834	1.17813	1.80519	0.000528788	0.114171
SEC63	0.418523	1.51972	1.1991	1.92605	0.000536419	0.114371
FUZ	-0.250209	0.778638	0.675762	0.897176	0.000538764	0.113453
WNT3A	0.181859	1.19944	1.0819	1.32976	0.000548434	0.114081
UBA7	-0.279376	0.756256	0.645348	0.886224	0.000554958	0.114047
KRTCAP3	-0.148416	0.862072	0.792258	0.938038	0.00057221	0.116193
UBXN11	-0.299363	0.74129	0.625096	0.879083	0.000578387	0.116065
HSPA9	0.547199	1.72841	1.26499	2.3616	0.000590483	0.117115
SLC20A2	0.357276	1.42943	1.16579	1.75269	0.000593187	0.116299
ADRB1	-0.15129	0.859598	0.788448	0.937169	0.000599054	0.116114
LOC220729	0.428139	1.5344	1.20125	1.95995	0.000607717	0.11647
SUSD3	-0.121772	0.88535	0.825744	0.949259	0.000616376	0.116817
HLA-DOB	-0.155785	0.855743	0.782686	0.935619	0.000622628	0.116705
PAX7	0.0877994	1.09177	1.03807	1.14824	0.000644525	0.119496
CLIC6	-0.0915611	0.912506	0.865659	0.961887	0.00066152	0.121328
PSME1	-0.403343	0.668083	0.529621	0.842743	0.000664497	0.120578
C8orf33	0.377107	1.45806	1.17344	1.81171	0.000665392	0.119469
GPR171	-0.16046	0.851752	0.776511	0.934283	0.000672537	0.119494
PXDNL	0.113056	1.11969	1.04904	1.1951	0.000674325	0.118577
CAMK4	-0.216382	0.805428	0.710955	0.912454	0.000675804	0.117624
CLEC9A	-0.190013	0.826948	0.741062	0.922789	0.000683329	0.117733
RPL27A	-0.396987	0.672343	0.534552	0.845651	0.000692037	0.118041
TSLP	-0.181486	0.83403	0.75093	0.926325	0.000701262	0.11843
MRAP2	-0.149767	0.860908	0.789385	0.938912	0.000713464	0.119309
SURF4	0.617859	1.85495	1.29636	2.65423	0.000725307	0.120112
PEX10	-0.493304	0.610606	0.458681	0.81285	0.00072618	0.1191
DTHD1	-0.214705	0.806779	0.712243	0.913863	0.00073417	0.119264
SIPA1L1	-0.494064	0.610142	0.457963	0.812889	0.000737684	0.118704
NTRK3	-0.120479	0.886496	0.826568	0.950768	0.000741831	0.118256
ZNF385B	-0.11425	0.892035	0.834589	0.953434	0.000768207	0.121327
SI	0.786741	2.19623	1.38865	3.47345	0.00076884	0.120313
RPS18	-0.394602	0.673948	0.535419	0.848319	0.000776291	0.120375
RPL14	-0.397999	0.671662	0.532507	0.847183	0.000779353	0.119761
OR5T3	3.07459	21.641	3.59878	130.136	0.000782159	0.119119
DACT2	-0.179065	0.836051	0.753078	0.928167	0.000785669	0.118594
TTC39C	-0.346585	0.707098	0.577418	0.865903	0.000799892	0.119682
LOC100129534	-0.226445	0.797363	0.698412	0.910333	0.000809296	0.120036
HCCS	0.559174	1.74923	1.26071	2.42704	0.000818516	0.120357
RPL11	-0.396597	0.672605	0.5327	0.849253	0.000858294	0.125128
OCRL	0.473712	1.60594	1.21543	2.12193	0.000861008	0.124459
ZIC2	0.0976577	1.10259	1.04098	1.16784	0.000871682	0.124943
PLXNB1	-0.353293	0.702371	0.570228	0.865136	0.000892925	0.126922
CYP24A1	-0.140906	0.868571	0.79927	0.943881	0.000895906	0.126293
SIAH2	-0.274553	0.759912	0.646104	0.893767	0.000910778	0.127337
TBP	0.596166	1.81515	1.27601	2.58208	0.000914998	0.126887
LEF1	-0.218788	0.803492	0.705983	0.914468	0.000918061	0.126285
TMIGD2	-0.226856	0.797036	0.696643	0.911896	0.000957591	0.130669
TAPBP	-0.437302	0.645776	0.498154	0.837145	0.000958883	0.129807
SNTN	-0.166537	0.846592	0.766885	0.934582	0.000963427	0.129395
GBP2	-0.240577	0.786174	0.681481	0.90695	0.000968757	0.129094
SFTPD	-0.197879	0.820469	0.729215	0.923143	0.00100435	0.132801
APOBEC3F	-0.255929	0.774197	0.664442	0.90208	0.0010339	0.135656
OR13C8	5.97447	393.26	11.0288	14022.7	0.00105137	0.136895
PAPLN	-0.213219	0.807979	0.711188	0.917942	0.00105614	0.136474
MAK	-0.172909	0.841214	0.758445	0.933015	0.00106795	0.136962
LCE3D	0.274881	1.31637	1.1165	1.55203	0.00106976	0.13617
CHMP4A	-0.413105	0.661593	0.516539	0.84738	0.00107012	0.135208
HSP90AA1	0.372978	1.45205	1.16126	1.81567	0.00107115	0.134342
FLT3	-0.112894	0.893245	0.83482	0.955759	0.00107151	0.133407
ATG4A	0.543254	1.7216	1.24298	2.38452	0.00108041	0.13354
MS4A1	-0.100698	0.904206	0.851216	0.960495	0.00108279	0.132871
KRTAP12-1	1.21971	3.38622	1.62903	7.03884	0.00108674	0.132404
MORN3	-0.19578	0.822193	0.730924	0.924859	0.0011098	0.134254
MTFR1	0.303218	1.35421	1.12854	1.62501	0.00111392	0.133804
HSPA8	0.418177	1.51919	1.18141	1.95354	0.00111678	0.133209
GZMM	-0.147991	0.862439	0.788939	0.942786	0.00112862	0.133687
YWHAB	0.588826	1.80187	1.26333	2.56998	0.00115303	0.135636
BCL2L14	-0.146346	0.863859	0.790682	0.943808	0.00119301	0.139378
FABP7	-0.0842266	0.919223	0.873536	0.967299	0.00120286	0.139573
GPR107	0.502861	1.65345	1.21938	2.24203	0.00120997	0.139449
COL17A1	-0.0886853	0.915134	0.867251	0.96566	0.00121924	0.139575
PPP2R2B	-0.186625	0.829754	0.741006	0.929132	0.00122271	0.139038
RPL31	-0.378048	0.685197	0.544814	0.861754	0.0012296	0.138896
GLI1	-0.16753	0.845751	0.76403	0.936213	0.00123245	0.138302
CLCA4	-0.175014	0.839445	0.754856	0.933514	0.00123998	0.138237
HBS1L	0.45255	1.57232	1.19463	2.06941	0.00124328	0.137706
CLEC3A	0.048534	1.04973	1.01925	1.08112	0.00124378	0.136872
KRT5	-0.0693101	0.933037	0.894585	0.973142	0.00124706	0.136354
MEOX1	-0.12054	0.886441	0.823864	0.953772	0.00125052	0.135861
OR7C1	-0.343876	0.709017	0.575194	0.873974	0.00127229	0.137351
PRRC1	0.565228	1.75985	1.24782	2.48199	0.00127293	0.136556
SLC35A2	0.484105	1.62272	1.2087	2.17855	0.0012765	0.136083
RELB	-0.283381	0.753233	0.633864	0.895082	0.00128619	0.136264
LCN1	0.416807	1.51711	1.17674	1.95593	0.00130214	0.137102
ME3	-0.225728	0.797935	0.695201	0.91585	0.00132743	0.138907
SATL1	0.452745	1.57262	1.19263	2.0737	0.00133543	0.138893
RHBDL1	-0.147894	0.862522	0.787952	0.944149	0.00134743	0.139292
SVOPL	-0.137989	0.871109	0.800584	0.947846	0.00135792	0.139531
WWOX	0.229258	1.25767	1.09301	1.44713	0.00136392	0.139308
SCML4	-0.144171	0.86574	0.792578	0.945656	0.00137271	0.139371
CARNS1	-0.253089	0.776399	0.664876	0.906627	0.00137932	0.139213
OR7A5	-0.245761	0.782109	0.672742	0.909256	0.00138509	0.138973
P4HA2	0.373981	1.45351	1.15571	1.82805	0.00138817	0.138468
C1RL	-0.362583	0.695877	0.557111	0.869207	0.00139717	0.138556
MIA	-0.0943901	0.909928	0.858736	0.964171	0.00139844	0.13788
QPRT	0.169225	1.18439	1.06754	1.31403	0.00140727	0.137953
CD52	-0.163011	0.849582	0.768688	0.938989	0.00140772	0.137209
KCNK9	0.169481	1.18469	1.06763	1.31458	0.00140866	0.13652
SERPINA3	-0.108623	0.897068	0.839192	0.958937	0.00141192	0.136063
CASP9	-0.525854	0.591051	0.427838	0.816526	0.00142604	0.136652
ABCC2	0.135363	1.14495	1.05341	1.24445	0.00145377	0.13853
TBC1D10C	-0.158874	0.853104	0.773591	0.940789	0.00145904	0.138261
PDP1	0.287713	1.33337	1.11665	1.59217	0.00147753	0.139239
ALDH3A1	-0.164067	0.848685	0.766883	0.939213	0.00151031	0.141546
EIF4E3	-0.315679	0.729293	0.600045	0.886382	0.00151526	0.141234
TNFRSF13B	-0.149656	0.861004	0.784946	0.944432	0.00151613	0.140547
SLAIN1	-0.125373	0.882168	0.816376	0.953262	0.00152242	0.140367
FOXQ1	-0.148995	0.861573	0.785662	0.94482	0.00154484	0.141668
NXNL2	-0.121071	0.885971	0.82199	0.954932	0.00154667	0.141078
OR52E6	0.32364	1.38215	1.13114	1.68886	0.00155053	0.140677
DAXX	-0.579471	0.560195	0.391268	0.802053	0.00155302	0.140158
IGSF1	-0.0937401	0.910519	0.859146	0.964965	0.00155877	0.139937
GPR18	-0.192579	0.824829	0.732015	0.929411	0.00156757	0.13999
EDA2R	0.222232	1.24886	1.08807	1.43341	0.00157583	0.139994
CCNA1	-0.165144	0.847772	0.765215	0.939235	0.00158196	0.139811
TMEM164	-0.272271	0.761647	0.643267	0.901814	0.00158281	0.139165
SPAG8	-0.205645	0.814122	0.716391	0.925185	0.00162301	0.141968
DLG3	0.528016	1.69556	1.22098	2.35462	0.00162352	0.141287
IL12B	-0.183587	0.83228	0.74238	0.933066	0.00164477	0.14241
TNFRSF18	-0.149782	0.860896	0.784233	0.945054	0.00164644	0.141835
VDAC1	0.509973	1.66525	1.21202	2.28795	0.00165351	0.141728
ROPN1L	-0.146564	0.86367	0.788272	0.94628	0.00166265	0.141799
MTDH	0.369054	1.44637	1.14869	1.82119	0.00169528	0.143863
TP63	-0.110448	0.895433	0.835731	0.959399	0.00170513	0.143982
TNN	-0.117093	0.889502	0.826753	0.957014	0.00170611	0.143355
SDR39U1	-0.421026	0.656373	0.50447	0.854016	0.00171856	0.143694
JAK2	-0.303962	0.737889	0.610125	0.892408	0.00172789	0.143769
S100B	-0.11216	0.893902	0.833297	0.958913	0.00174071	0.144133
MBLAC1	-0.277565	0.757626	0.636734	0.901472	0.00175144	0.144321
TPT1	-0.36725	0.692636	0.550185	0.871971	0.00177114	0.145242
CTSW	-0.130625	0.877547	0.808524	0.952463	0.00177672	0.145002
ALOX15	0.1076	1.1136	1.04082	1.19148	0.00180912	0.146944
CDHR4	-0.168367	0.845044	0.760205	0.939351	0.00181466	0.146695
VTA1	0.458597	1.58185	1.18462	2.11228	0.00188171	0.151398
LTA4H	-0.546954	0.57871	0.409857	0.817127	0.00188782	0.151176
SMR3A	0.190682	1.21007	1.0729	1.36478	0.00189426	0.150983
ZNF219	-0.226988	0.79693	0.690475	0.919798	0.00191764	0.152135
SCARB2	0.4374	1.54868	1.17479	2.04156	0.00191824	0.151479
MED17	0.510986	1.66693	1.20698	2.30216	0.00192236	0.151105
RPS9	-0.311392	0.732427	0.601594	0.891712	0.00192525	0.150637
RBMY2FP	0.766109	2.15138	1.32557	3.49166	0.00193099	0.150396
SLC7A3	-0.144725	0.86526	0.789533	0.94825	0.00195439	0.151527
TMEM151B	-0.279935	0.755833	0.63307	0.902401	0.00196406	0.151588
PLAC8	-0.13432	0.87431	0.802924	0.952043	0.00199588	0.15335
PLA2G2D	-0.102566	0.902519	0.845683	0.963175	0.0019979	0.152817
LAT	-0.188238	0.828418	0.735184	0.933475	0.00200144	0.152404
CCDC57	-0.303884	0.737947	0.608496	0.894937	0.00201571	0.152809
PCYT1A	0.424888	1.52942	1.16785	2.00294	0.00201894	0.152376
RPL5	-0.389094	0.677671	0.529342	0.867563	0.00202079	0.151844
GGNBP1	0.451177	1.57016	1.17903	2.09104	0.00202395	0.151415
FAM111A	-0.355742	0.700654	0.558797	0.878522	0.00205594	0.153136
CST7	-0.156127	0.855451	0.774457	0.944915	0.00209483	0.155355
C17orf99	-0.435368	0.647026	0.490192	0.85404	0.00211228	0.15597
PWRN1	0.562509	1.75507	1.22605	2.51235	0.00211564	0.155545
SPIB	-0.108138	0.897504	0.837695	0.961584	0.00211717	0.154989
EPB41L4B	0.258475	1.29495	1.09805	1.52716	0.00212978	0.155246
PLCD1	-0.342527	0.709974	0.570477	0.883582	0.00214841	0.155938
CBR1	-0.20652	0.81341	0.712889	0.928106	0.00215112	0.155473
GP1BA	-0.170167	0.843524	0.756645	0.940379	0.00215187	0.154871
ZP1	0.153883	1.16635	1.05712	1.28687	0.00216084	0.154863
CGB8	0.413531	1.51215	1.16099	1.96952	0.00216153	0.154265
MRGPRX1	2.85046	17.2957	2.79704	106.95	0.00216601	0.15394
HNRNPA1L2	-0.569255	0.565947	0.393257	0.814469	0.00217771	0.154129
SLC22A11	-0.2553	0.774684	0.65783	0.912294	0.00221128	0.155859
PLA2G1B	-0.381068	0.683132	0.535171	0.871999	0.00221545	0.15551
TOX	-0.139206	0.870049	0.795822	0.951199	0.00221617	0.154923
TMEM60	-0.509178	0.60099	0.433657	0.83289	0.00222657	0.155014
PDSS2	0.342651	1.40868	1.13085	1.75475	0.00223467	0.154946
OSR1	-0.111214	0.894747	0.833169	0.960876	0.00223594	0.154407
RPLP1	-0.339109	0.712405	0.57317	0.885464	0.00224075	0.154115
SLC7A4	-0.089759	0.914151	0.862964	0.968376	0.00226577	0.15521
NFKB2	-0.33064	0.718464	0.580938	0.888545	0.0022881	0.156113
CPT1A	0.268708	1.30827	1.10076	1.55491	0.00229301	0.155824
IGF2R	0.364268	1.43946	1.13893	1.8193	0.00229839	0.15557
UBE2A	0.572449	1.7726	1.22659	2.56168	0.00231078	0.15579
ZNF155	-0.327841	0.720477	0.583482	0.889637	0.00231337	0.155351
DIP2B	0.424341	1.52858	1.16325	2.00865	0.00232603	0.155589
KLRK1	-0.142891	0.866849	0.790626	0.95042	0.0023436	0.156152
MAL2	0.247505	1.28083	1.09205	1.50223	0.00234704	0.155772
MAGT1	0.47691	1.61109	1.18478	2.19079	0.00235603	0.155763
DEFB103B	0.323211	1.38156	1.12141	1.70205	0.00239366	0.157639
C6orf141	-0.117581	0.889068	0.824047	0.95922	0.00240984	0.158095
TCN1	-0.0786376	0.924375	0.878582	0.972555	0.00241766	0.158
KCNE1	-0.140568	0.868865	0.793388	0.951522	0.00243164	0.158307
CD8A	-0.149015	0.861556	0.782419	0.948698	0.0024351	0.15793
TUBA3D	-0.0941095	0.910183	0.85644	0.967298	0.00244004	0.15765
ADAM9	0.21528	1.24021	1.07902	1.42548	0.00244094	0.157114
NUDT14	-0.293511	0.745641	0.616698	0.901545	0.00244644	0.156876
KLRC3	-0.16736	0.845895	0.759027	0.942705	0.00246857	0.157702
YIPF6	0.352554	1.4227	1.13207	1.78792	0.00249445	0.15876
PTPN18	-0.469929	0.625047	0.460929	0.847601	0.00249503	0.158207
CCDC28B	-0.231947	0.792988	0.682277	0.921664	0.00250113	0.158007
CD27	-0.131479	0.876798	0.805135	0.954838	0.00250909	0.157925
OR51F1	4.18078	65.417	4.34144	985.707	0.00252099	0.15809
TECTA	0.243127	1.27523	1.08879	1.4936	0.00257194	0.160695
CD3D	-0.122712	0.884519	0.816671	0.958003	0.00258141	0.160697
NFKBIE	-0.326665	0.721325	0.583227	0.892123	0.00258886	0.160575
MRO	0.224402	1.25157	1.08154	1.44834	0.00259421	0.160324
RSPH4A	-0.178911	0.83618	0.74422	0.939505	0.00261478	0.161012
CXCL1	-0.120343	0.886616	0.819778	0.958904	0.00261821	0.160643
RPS29	-0.38889	0.677809	0.526132	0.873211	0.00262131	0.160257
TNFRSF17	-0.115501	0.890919	0.826351	0.960533	0.00262146	0.159694
ADHFE1	-0.185232	0.830912	0.736452	0.937486	0.00262642	0.159426
ARID5A	-0.231083	0.793674	0.68268	0.922713	0.00264288	0.159857
STIP1	0.394307	1.48336	1.14703	1.9183	0.00265073	0.159765
CXCL13	-0.0814032	0.921822	0.874136	0.97211	0.00266704	0.160182
ARHGEF1	-0.343725	0.709124	0.56645	0.887733	0.00270904	0.162134
STX11	-0.230554	0.794094	0.682853	0.923456	0.00275243	0.164154
RPPH1	-0.179877	0.835373	0.742471	0.9399	0.00278613	0.165585
RPS8	-0.337016	0.713898	0.572342	0.890463	0.00280044	0.165858
HYI	-0.261815	0.769654	0.648183	0.913888	0.00281313	0.166033
TRIM45	-0.252001	0.777244	0.65875	0.917051	0.0028265	0.166247
REPS1	0.438728	1.55073	1.16259	2.06846	0.00283656	0.166265
ZNF674	0.448667	1.56622	1.16619	2.10348	0.00286684	0.167465
SLC6A3	0.162766	1.17676	1.05735	1.30965	0.00286805	0.166964
TOR1B	0.516835	1.67671	1.19359	2.35539	0.00287806	0.166976
SDAD1	0.488367	1.62965	1.18196	2.24692	0.00288191	0.166633
APOA5	0.242401	1.2743	1.08635	1.49477	0.00290797	0.167572
OSGEP	-0.440093	0.643977	0.48185	0.860655	0.00293896	0.168787
TRAF1	-0.22227	0.800699	0.69158	0.927034	0.00294374	0.168495
TULP4	0.391328	1.47894	1.14259	1.91431	0.00295411	0.168522
RAPGEFL1	-0.172442	0.841607	0.751111	0.943007	0.0029685	0.168779
CD40LG	-0.131513	0.876768	0.803898	0.956243	0.00297186	0.168409
CD74	-0.204766	0.814838	0.71183	0.932753	0.00298256	0.168455
POU2AF1	-0.103958	0.901264	0.841494	0.965279	0.00298442	0.168004
BTG2	-0.181435	0.834072	0.73986	0.940281	0.0030085	0.168803
SLC30A5	0.487792	1.62872	1.17982	2.2484	0.00302514	0.16918
SRXN1	0.350269	1.41945	1.12606	1.78927	0.0030269	0.168725
UBXN1	-0.311561	0.732303	0.595967	0.899826	0.0030347	0.168609
STOX1	-0.160694	0.851552	0.7657	0.947031	0.00303956	0.168331
ARHGAP26	-0.228558	0.79568	0.684032	0.925553	0.00304796	0.168249
IYD	0.093978	1.09854	1.0323	1.16902	0.00305812	0.168265
TPRXL	0.115936	1.12292	1.03996	1.21251	0.00307255	0.168516
TAS2R30	-0.881661	0.414095	0.230924	0.742558	0.0030873	0.168782
IP6K2	-0.482996	0.616932	0.447939	0.849682	0.00310302	0.1691
RPL29	-0.309809	0.733587	0.597249	0.901047	0.0031448	0.170831
KRT17	-0.0691849	0.933154	0.891276	0.977	0.00314528	0.170314
IGFALS	-0.106034	0.899394	0.838267	0.964978	0.00315025	0.170044
TRMT2B	0.439722	1.55228	1.15929	2.07848	0.00315353	0.169684
TPRG1	-0.0880067	0.915755	0.863783	0.970853	0.00315483	0.16922
NUDCD1	0.299493	1.34917	1.10589	1.64597	0.00315621	0.168763
NCBP1	0.482342	1.61986	1.17598	2.2313	0.0031566	0.168257
MORF4L2	0.35655	1.42839	1.12726	1.80996	0.00316062	0.167946
FAM120B	0.450935	1.56978	1.16357	2.11779	0.00316156	0.167474
CPSF4	-0.489485	0.612942	0.442844	0.848375	0.00316295	0.167029
MITD1	-0.499597	0.606775	0.435397	0.845611	0.00317509	0.167153
HCG27	-0.225127	0.798415	0.687448	0.927294	0.00319184	0.167517
S1PR4	-0.149673	0.860989	0.779445	0.951064	0.00319533	0.167186
PHKB	0.323358	1.38176	1.11446	1.71317	0.00319911	0.166872
OR13C5	1.06773	2.90877	1.42965	5.91821	0.00321675	0.167281
HSD11B1	-0.151209	0.859668	0.777359	0.950692	0.00323277	0.167603
PRKCZ	-0.316615	0.728612	0.590154	0.899553	0.00323585	0.167254
ASB2	-0.176337	0.838335	0.745424	0.942828	0.00325819	0.1679
NPY1R	-0.0732257	0.929391	0.885143	0.975851	0.00325952	0.167463
GFI1	-0.160892	0.851384	0.764811	0.947757	0.00327486	0.167746
CLCNKB	-0.241835	0.785186	0.668275	0.92255	0.00328223	0.16762
HCST	-0.185353	0.830811	0.734197	0.940138	0.00329685	0.167864
XRCC1	-0.44467	0.641036	0.476494	0.862395	0.00330185	0.167618
VSIG8	0.207545	1.23065	1.07151	1.41343	0.0033073	0.167397
PLEKHA4	-0.179169	0.835965	0.741747	0.942151	0.00331746	0.167414
ZMYND15	-0.218171	0.803988	0.695014	0.930047	0.00332654	0.167377
MYBPH	-0.216192	0.805581	0.697275	0.930709	0.00333813	0.167466
CACNA1H	0.106412	1.11228	1.03596	1.19422	0.0033459	0.167364
RBM15B	-0.603019	0.547157	0.36562	0.818832	0.00337105	0.168128
TTC24	-0.233047	0.792116	0.677832	0.925668	0.00337242	0.167707
ULBP2	0.148556	1.16016	1.05034	1.28146	0.00341187	0.169175
CCL5	-0.140487	0.868935	0.790923	0.954642	0.00342094	0.169133
DSTN	0.416452	1.51657	1.14733	2.00465	0.00344053	0.16961
CD1B	-0.145379	0.864694	0.784431	0.95317	0.00344528	0.169355
RPH3A	0.160873	1.17454	1.05442	1.30833	0.00346939	0.17005
REEP2	-0.162148	0.850315	0.762701	0.947995	0.0034717	0.169676
INPP5A	0.441801	1.55551	1.15655	2.09208	0.00347936	0.169564
TBC1D24	0.306093	1.35811	1.10597	1.66773	0.00348644	0.169425
PARP12	-0.334868	0.715433	0.571411	0.895755	0.00350166	0.169682
FAM117A	-0.291557	0.747099	0.61421	0.90874	0.00352756	0.170452
ERRFI1	-0.24545	0.782352	0.663389	0.922649	0.00353882	0.170513
MYBPC1	-0.0679318	0.934324	0.89263	0.977966	0.00353976	0.170078
STAC2	-0.0660824	0.936054	0.89539	0.978564	0.00354319	0.169765
COX6B2	-0.141734	0.867852	0.788977	0.954613	0.00355215	0.169717
CS	0.545483	1.72544	1.19539	2.49052	0.00357869	0.170508
POLR3GL	-0.377841	0.685339	0.531482	0.883736	0.00358241	0.170209
APOBEC3G	-0.181421	0.834085	0.73823	0.942386	0.00358361	0.169793
C8orf76	0.33016	1.39119	1.114	1.73735	0.00358865	0.169561
CCDC92	-0.446854	0.639637	0.473407	0.864236	0.00361165	0.170176
GSTK1	-0.363954	0.694923	0.543682	0.888236	0.00365606	0.171795
CYP4F11	-0.0902573	0.913696	0.859715	0.971066	0.00367323	0.172127
CCDC74B	-0.11256	0.893544	0.828194	0.96405	0.00367475	0.171727
IL18RAP	-0.158838	0.853134	0.766401	0.949684	0.00368715	0.171835
RILPL2	-0.297017	0.743031	0.608019	0.908023	0.0036961	0.171783
CD6	-0.141564	0.868	0.788874	0.955062	0.00369882	0.171442
TRAT1	-0.122986	0.884276	0.813795	0.96086	0.00370663	0.171339
ZNF345	-0.364242	0.694723	0.543148	0.888599	0.00372593	0.171766
PTPRCAP	-0.135476	0.8733	0.796886	0.957043	0.00373429	0.171687
IFNG	-0.152407	0.858639	0.774558	0.951848	0.00374926	0.171911
SORBS1	-0.202659	0.816557	0.711958	0.936524	0.00375983	0.171934
CALML3	-0.0758484	0.926957	0.880579	0.975777	0.00377577	0.172201
SCFD2	0.524104	1.68895	1.18448	2.40827	0.00378928	0.172357
ARID1B	0.478393	1.61348	1.16697	2.23084	0.00380301	0.172521
SAA1	-0.0899017	0.914021	0.860024	0.971409	0.00380807	0.172292
SNX9	0.484941	1.62408	1.16924	2.25586	0.00382095	0.172418
CCDC97	-0.568968	0.566109	0.384965	0.832491	0.00383114	0.172422
PCYT2	-0.340616	0.711332	0.564688	0.896059	0.00383174	0.171995
WNT1	-0.282563	0.753849	0.622384	0.913084	0.00385322	0.172505
OR5H1	3.21049	24.7912	2.80817	218.864	0.00386287	0.172484
RPL3	-0.318256	0.727416	0.586149	0.90273	0.00386672	0.172206
HLA-DQB2	-0.127644	0.880166	0.807083	0.959867	0.00390044	0.173255
ZNF18	-0.410814	0.66311	0.501673	0.876498	0.00390144	0.172849
NFIA	-0.184159	0.831804	0.733995	0.942647	0.0039096	0.172762
DCAF13	0.300046	1.34992	1.10093	1.65522	0.00392224	0.172873
PCSK6	-0.12506	0.882444	0.810543	0.960723	0.00392659	0.172618
ACAP1	-0.130717	0.877466	0.802874	0.958987	0.00392829	0.172249
LTB	-0.106963	0.898559	0.835537	0.966334	0.00393921	0.172285
ZDHHC8	-0.29032	0.748024	0.613988	0.91132	0.00395547	0.172553
RBMY1J	0.610433	1.84123	1.21529	2.78955	0.00397864	0.173122
C1orf194	-0.152829	0.858276	0.773484	0.952364	0.00398178	0.172818
SPINK8	0.0958544	1.1006	1.03108	1.1748	0.00398255	0.172412
RGS3	0.416892	1.51724	1.14186	2.01602	0.00404404	0.174631
ETFA	0.320949	1.37843	1.10752	1.71562	0.00404435	0.174203
SARM1	-0.185769	0.830465	0.731656	0.942619	0.00404972	0.173995
SYNJ2	0.326577	1.38621	1.10944	1.73203	0.00405401	0.173742
ZSCAN21	-0.560781	0.570763	0.389325	0.836758	0.00406552	0.173799
NAB2	-0.313631	0.730789	0.589909	0.905313	0.00410014	0.17484
ZP2	0.136515	1.14627	1.04416	1.25838	0.00413604	0.175931
TUBA3E	-0.0930765	0.911124	0.854964	0.970972	0.0041375	0.175555
ENPP6	-0.181569	0.833961	0.736599	0.944191	0.00414881	0.175598
POLR2B	0.464169	1.59069	1.15804	2.18499	0.00415835	0.175567
GZMA	-0.124407	0.88302	0.810962	0.961481	0.00417867	0.175989
STX7	0.485595	1.62514	1.16559	2.26587	0.00418893	0.175987
ANKRD52	0.406576	1.50167	1.13687	1.98353	0.0041917	0.17567
LOC100128164	-0.300837	0.740198	0.60244	0.909458	0.00419321	0.175303
RILP	-0.237494	0.788602	0.67023	0.92788	0.00420958	0.175557
SFTPB	-0.22751	0.796515	0.681585	0.930823	0.00421461	0.175338
ELOVL2	-0.0795805	0.923504	0.874513	0.975239	0.0042161	0.174973
IL17B	-0.145378	0.864696	0.78268	0.955305	0.00424625	0.175797
PAICS	0.385826	1.47083	1.12902	1.91613	0.00424699	0.175402
PSMB10	-0.246952	0.781178	0.659475	0.925342	0.00426441	0.175696
EEF1B2	-0.399062	0.670949	0.510308	0.882159	0.00426462	0.175281
DIRAS3	-0.138295	0.870842	0.792039	0.957484	0.00426689	0.174953
FAM181A	-0.458072	0.632502	0.461932	0.866055	0.00427887	0.175023
NR1H3	-0.318527	0.72722	0.5843	0.905098	0.00432938	0.176665
RGL4	-0.176879	0.837881	0.74195	0.946216	0.00435693	0.177366
C20orf85	-0.14194	0.867674	0.786984	0.956637	0.00437001	0.177474
ERF	-0.335128	0.715247	0.56801	0.90065	0.00437517	0.177262
GZMK	-0.105856	0.899554	0.836382	0.967499	0.00438102	0.177078
PNO1	0.503105	1.65385	1.16988	2.33804	0.00439677	0.177295
CD1C	-0.112998	0.893152	0.826314	0.965397	0.00440875	0.177358
OR6C4	1.14195	3.13286	1.42712	6.87737	0.00442031	0.177405
MAFF	-0.246181	0.781781	0.659854	0.926237	0.00443137	0.177432
LHX1	0.110715	1.11708	1.03504	1.20561	0.00444115	0.177407
CCL27	-0.610961	0.542829	0.35625	0.827125	0.00446578	0.177974
OPN4	0.25444	1.28974	1.08218	1.5371	0.00448012	0.178129
PDCD4	-0.211001	0.809773	0.700083	0.93665	0.00449418	0.178273
TMED7-TICAM2	0.15597	1.16879	1.04944	1.30172	0.00453856	0.179616
CD160	-0.276466	0.758459	0.626633	0.918018	0.00453892	0.179214
LRP1B	-0.0920007	0.912105	0.855952	0.971941	0.00454163	0.178907
FGFBP1	-0.107406	0.898161	0.83394	0.967328	0.0045462	0.178674
PIM2	-0.245584	0.782248	0.660129	0.926957	0.00457113	0.179241
DLEC1	-0.177243	0.837576	0.740979	0.946765	0.00458348	0.179313
FOXJ1	-0.0830033	0.920348	0.868943	0.974795	0.00464744	0.181399
GOSR2	0.473357	1.60537	1.15668	2.22812	0.00465121	0.181132
STAP1	-0.138234	0.870895	0.791391	0.958386	0.00465176	0.18074
TMEM14B	-0.447173	0.639433	0.469088	0.871637	0.0046673	0.180932
KCNIP1	-0.200323	0.818466	0.712395	0.940332	0.00467365	0.180767
MATK	-0.127935	0.879911	0.805265	0.961475	0.00467567	0.180436
APC2	0.162386	1.17631	1.05106	1.3165	0.00470122	0.181013
SCARNA2	-0.227158	0.796795	0.680593	0.932837	0.00473682	0.181973
STAT4	-0.136652	0.872274	0.793333	0.95907	0.00475117	0.182114
C1orf53	-0.205516	0.814227	0.705969	0.939086	0.0047522	0.181745
BTN2A2	-0.329302	0.719426	0.572362	0.904277	0.0047674	0.181918
OTUD6B	0.272905	1.31378	1.08689	1.58802	0.00478158	0.182052
PCDHGA11	0.170668	1.1861	1.05349	1.3354	0.00478277	0.181692
FCRL5	-0.0951954	0.909195	0.850967	0.971408	0.0048172	0.182593
HINT3	0.359444	1.43253	1.11574	1.83928	0.0048207	0.182321
CCL1	-0.578383	0.560805	0.375099	0.83845	0.00482273	0.181994
SNX3	0.397333	1.48785	1.12867	1.96133	0.00482303	0.181603
TMEM229B	-0.190394	0.826634	0.724109	0.943674	0.00483166	0.181528
TEKT1	-0.160028	0.85212	0.762352	0.952458	0.00483889	0.1814
CNGA4	-0.226014	0.797707	0.681639	0.933539	0.00484466	0.181218
FGF19	-0.211221	0.809595	0.698942	0.937767	0.00484951	0.181003
DMAP1	-0.409326	0.664098	0.499437	0.883046	0.00487057	0.181391
RBM45	0.815588	2.2605	1.28121	3.98832	0.00487194	0.181047
ZRSR2	-0.422833	0.655188	0.488105	0.879464	0.00487626	0.180814
ESR2	-0.256954	0.773404	0.646698	0.924935	0.00488153	0.180617
PSPC1	-0.508772	0.601234	0.421847	0.856902	0.00489024	0.180547
PRKAB2	0.34888	1.41748	1.11168	1.80739	0.00489431	0.180307
SHCBP1	0.193563	1.21357	1.06047	1.38876	0.00490278	0.18023
PARD6A	-0.243148	0.784155	0.661925	0.928957	0.00491861	0.180423
PCDHA8	0.146267	1.15751	1.04531	1.28175	0.00492659	0.180328
ARFGEF1	0.288477	1.33439	1.09122	1.63175	0.00494655	0.180671
RNF139	0.338779	1.40323	1.10767	1.77767	0.00499569	0.182076
DNAJB5	-0.299988	0.740827	0.600742	0.913578	0.00502924	0.182908
HLA-J	-0.187122	0.829342	0.727689	0.945196	0.00503481	0.182721
KRT14	-0.0597468	0.942003	0.903481	0.982168	0.00503836	0.182461
SLC25A32	0.350746	1.42013	1.11135	1.8147	0.0050481	0.182427
ABCD2	-0.137911	0.871176	0.791104	0.959354	0.00505532	0.182302
GNL3L	0.41679	1.51708	1.13361	2.03028	0.00505558	0.181926
PGM3	0.318322	1.37482	1.10032	1.71779	0.00508972	0.182769
CCND2	-0.218792	0.803489	0.689386	0.936477	0.00511322	0.183227
AHRR	0.177478	1.1942	1.05466	1.35221	0.00512012	0.18309
THAP8	-0.393053	0.674993	0.512545	0.888927	0.00513951	0.183399
FAM181B	-0.1327	0.875728	0.797983	0.961047	0.00514842	0.183333
ZNF623	0.290772	1.33746	1.09081	1.63988	0.0051791	0.184042
KIF5B	0.408676	1.50482	1.12985	2.00424	0.00519161	0.184102
CHTF8	0.550541	1.73419	1.17862	2.55164	0.00520537	0.184207
ABCA10	-0.138623	0.870556	0.789841	0.959519	0.00523268	0.184791
LIMD2	-0.187182	0.829293	0.72717	0.945757	0.00524242	0.184752
RPL4	-0.379947	0.683898	0.523739	0.893032	0.00525437	0.184791
PROX2	-0.358963	0.6984	0.542772	0.898651	0.0052587	0.184563
RPL36	-0.266591	0.765986	0.63513	0.923803	0.00528427	0.18508
SLC25A29	-0.250348	0.77853	0.652849	0.928407	0.00532117	0.18599
LRRFIP2	-0.374359	0.68773	0.528096	0.895619	0.00546887	0.190762
PVRIG	-0.185403	0.830769	0.728899	0.946877	0.00547273	0.190507
TLR10	-0.140403	0.869008	0.787023	0.959534	0.00548675	0.190606
MYL5	-0.240485	0.786246	0.663478	0.931732	0.00549845	0.190624
ODF3L2	0.228259	1.25641	1.06941	1.47611	0.0055	0.190291
PLEKHO1	-0.250463	0.77844	0.65223	0.929073	0.00551889	0.190558
RPL38	-0.33325	0.716591	0.566255	0.906841	0.00553807	0.190834
IRF1	-0.231251	0.793541	0.673902	0.934418	0.00554586	0.190717
GZMH	-0.125556	0.882007	0.807118	0.963845	0.00554745	0.190388
ANKK1	-0.169836	0.843803	0.748353	0.951428	0.00555585	0.190293
GPR132	-0.190566	0.826492	0.722298	0.945715	0.00557501	0.190567
SPINT1	0.365295	1.44094	1.11282	1.8658	0.00559203	0.190766
BTG1	-0.314932	0.729839	0.584047	0.912023	0.00560682	0.190889
GPR55	-0.137896	0.87119	0.790154	0.960535	0.00563529	0.191476
SERPINA12	-0.160961	0.851326	0.759523	0.954224	0.00569538	0.193133
SOCS3	-0.203199	0.816116	0.706625	0.942572	0.00569847	0.192855
RUNX1	-0.270173	0.763248	0.630137	0.924476	0.00572599	0.193402
SLC16A8	-0.189806	0.827119	0.722905	0.946357	0.00573798	0.193424
TMEM167A	0.49824	1.64582	1.15557	2.34406	0.00575633	0.19366
NEK10	-0.0786344	0.924378	0.87418	0.977458	0.00577447	0.193888
COPS5	0.379422	1.46144	1.11614	1.91357	0.00579982	0.194357
OR7D2	-0.192413	0.824966	0.719547	0.945829	0.0058093	0.194293
PSTPIP1	-0.13603	0.872816	0.792365	0.961436	0.00583251	0.194687
NDRG2	-0.175157	0.839325	0.741045	0.95064	0.00584023	0.194564
ACBD5	0.344525	1.41132	1.10445	1.80346	0.00588484	0.195668
OSBPL1A	-0.275504	0.759189	0.624002	0.923664	0.00589396	0.19559
STEAP2	-0.140029	0.869333	0.786862	0.960448	0.005896	0.195278
SEC24A	0.335432	1.39855	1.10146	1.77576	0.00590323	0.195138
CASP7	-0.316458	0.728726	0.581723	0.912878	0.00590651	0.194869
CLEC10A	-0.0985801	0.906123	0.844688	0.972027	0.00592317	0.195041
IL18BP	-0.240115	0.786537	0.662862	0.933287	0.00594182	0.195279
CCDC24	-0.214978	0.806559	0.691992	0.940094	0.00595445	0.195317
KCNH3	-0.147343	0.862998	0.776973	0.958547	0.00595625	0.195001
MST1	-0.158317	0.853579	0.762497	0.955541	0.00596171	0.194806
RPS6KA1	-0.330355	0.718669	0.567833	0.909572	0.00598606	0.195228
PMAIP1	-0.161188	0.851132	0.758668	0.954864	0.00601239	0.195712
ICAM3	-0.276035	0.758786	0.623081	0.924047	0.00603828	0.196181
ATP6V1H	0.347199	1.4151	1.10445	1.81312	0.00604006	0.195866
BNC1	-0.132107	0.876248	0.797377	0.96292	0.00604878	0.195776
OR56B4	0.360661	1.43428	1.10865	1.85554	0.00605081	0.195471
WT1	0.0861341	1.08995	1.02493	1.1591	0.00606094	0.195428
CAMSAP1	0.431177	1.53907	1.13114	2.0941	0.00606462	0.195178
PHF20	0.42059	1.52286	1.12767	2.05655	0.0060736	0.195099
ITK	-0.110091	0.895753	0.827998	0.969052	0.00608196	0.195
WDR17	-0.104453	0.900817	0.836013	0.970644	0.00610354	0.195325
SH3BP1	-0.266547	0.76602	0.633116	0.926824	0.00611434	0.195304
FCRLA	-0.114499	0.891813	0.821714	0.967892	0.00611958	0.195106
KLRC1	-0.147666	0.862719	0.776222	0.958855	0.00615507	0.195871
WNT10A	-0.142907	0.866835	0.782578	0.960163	0.00615971	0.195654
KRT15	-0.0810155	0.922179	0.870235	0.977224	0.00616599	0.195489
CLDN19	-0.115914	0.890552	0.819657	0.967579	0.00616935	0.195233
COPS4	0.522278	1.68586	1.16007	2.44998	0.00617249	0.194971
PCDHB2	0.127696	1.13621	1.03696	1.24495	0.00617773	0.194775
CABYR	-0.196569	0.821544	0.713662	0.945735	0.00620507	0.195277
LY9	-0.118415	0.888327	0.816087	0.966962	0.00621381	0.195191
PFDN5	-0.370779	0.690197	0.529099	0.900344	0.00625605	0.196157
CITED4	-0.115193	0.891194	0.820546	0.967926	0.00626516	0.196082
GZMB	-0.101282	0.903678	0.840365	0.971761	0.006278	0.196124
PTMA	-0.4157	0.659878	0.489665	0.88926	0.00631382	0.196883
IFNE	-0.26942	0.763822	0.62951	0.92679	0.00632424	0.196848
PLEKHH1	-0.198131	0.820263	0.711472	0.945689	0.00634966	0.197279
UBTF	-0.585078	0.557062	0.365898	0.848102	0.00636785	0.197484
HSPA2	-0.134712	0.873968	0.793351	0.962777	0.00636799	0.19713
ACTL8	0.0688223	1.07125	1.01956	1.12555	0.00637727	0.19706
GRHPR	-0.461042	0.630626	0.452714	0.878456	0.00640564	0.197579
CD19	-0.0978497	0.906785	0.845149	0.972917	0.00644099	0.198311
PCGF5	-0.338979	0.712497	0.558301	0.90928	0.00644439	0.198058
PHAX	0.465348	1.59257	1.13894	2.22688	0.00651792	0.199957
TMEM156	-0.137594	0.871453	0.78921	0.962266	0.00651857	0.199618
RPS11	-0.338882	0.712567	0.558205	0.909614	0.0065188	0.199267
GSTM2	-0.119788	0.887108	0.813729	0.967104	0.00654235	0.19963
TANK	-0.399534	0.670632	0.502813	0.894464	0.00654851	0.199461
SH2D2A	-0.137326	0.871686	0.789528	0.962394	0.00655037	0.199162
RPL13	-0.266306	0.766205	0.632351	0.928392	0.00655924	0.199076
GSTZ1	-0.25347	0.776103	0.646437	0.931778	0.00657683	0.199256
CDK11B	-0.460683	0.630853	0.452461	0.879578	0.00659524	0.199459
MGC15885	-0.767727	0.464067	0.266657	0.80762	0.0066119	0.199609
RAD23B	0.529419	1.69795	1.15864	2.48829	0.00662564	0.199671
SH3BP5	-0.275998	0.758814	0.621687	0.926188	0.00664842	0.200004
NDUFB1	-0.337553	0.713514	0.55914	0.91051	0.00665485	0.199845
MYO7A	-0.166098	0.846964	0.751201	0.954934	0.00666324	0.199745
DBH	-0.209194	0.811238	0.697456	0.943583	0.00666539	0.199459
SLC23A1	-0.130355	0.877784	0.79883	0.96454	0.00671315	0.200536
CCDC157	-0.225589	0.798046	0.677912	0.93947	0.006727	0.200599
MMGT1	0.364735	1.44013	1.1062	1.87487	0.00673136	0.200378
LAMB3	-0.122325	0.88486	0.809911	0.966746	0.00675068	0.200603
FOXE1	-0.260132	0.77095	0.638679	0.930614	0.00675318	0.200329
GABRQ	0.10387	1.10946	1.02913	1.19606	0.00675572	0.200056
TRMT5	-0.573363	0.563627	0.37221	0.853485	0.00676282	0.199919
PTPN2	-0.433877	0.647992	0.473335	0.887096	0.00677754	0.200008
CAND2	-0.168991	0.844517	0.747263	0.954427	0.00678552	0.199897
QRFPR	-0.156506	0.855126	0.763516	0.957728	0.00678864	0.199644
FLT3LG	-0.200692	0.818164	0.707507	0.946129	0.00679233	0.199409
BCL2A1	-0.142121	0.867516	0.782674	0.961555	0.00679866	0.199252
RNF31	-0.492486	0.611105	0.427722	0.873112	0.0068233	0.199631
ENPEP	0.210231	1.23396	1.05961	1.437	0.00683107	0.199516
PGAM4	0.365549	1.44131	1.10578	1.87864	0.00685781	0.199955
PAFAH1B1	0.479138	1.61468	1.1408	2.28541	0.0068684	0.199922
MTA1	-0.357498	0.699424	0.539699	0.90642	0.00687631	0.199811
IGF2BP1	0.13126	1.14026	1.03669	1.25419	0.00690171	0.200208
USP46	0.374711	1.45457	1.10816	1.90927	0.00693415	0.200808
USF2	-0.379182	0.684421	0.519722	0.901313	0.00693924	0.200615
DOC2B	-0.120599	0.886389	0.81208	0.967498	0.00694212	0.200358
MOSPD1	0.421479	1.52421	1.12239	2.06989	0.00694453	0.200089
N4BP2L1	-0.242361	0.784773	0.658043	0.935908	0.00699498	0.201203
C9orf24	-0.203542	0.815836	0.703663	0.945892	0.0069954	0.200876
PCDHGA1	0.132082	1.1412	1.03674	1.25619	0.00700487	0.20081
HNRNPC	-0.726507	0.483595	0.285152	0.820139	0.00702446	0.201034
TIMM8A	0.319776	1.37682	1.09119	1.73721	0.00702513	0.200716
WLS	-0.152189	0.858826	0.768849	0.959332	0.007034	0.200634
SLC45A1	-0.181787	0.833779	0.730514	0.951641	0.00704455	0.200599
TRIM21	-0.301998	0.73934	0.593484	0.921041	0.00706914	0.200964
SEC14L2	-0.125956	0.881653	0.804428	0.966293	0.00707931	0.200918
GNG4	-0.0997209	0.90509	0.84173	0.973219	0.00708	0.200604
PSENEN	-0.348558	0.705705	0.547561	0.909523	0.00709091	0.20058
CMTM4	0.256863	1.29287	1.07229	1.55882	0.00711814	0.201017
MTRF1L	0.469872	1.59979	1.13562	2.25369	0.00720268	0.203068
HARS2	0.566766	1.76256	1.16557	2.6653	0.00722921	0.20348
ZACN	-0.33638	0.714352	0.558852	0.91312	0.00724003	0.203448
IL18	-0.173494	0.840722	0.740715	0.954233	0.00725348	0.203491
PHF7	-0.238527	0.787787	0.661874	0.937654	0.00726496	0.203478
VPS35	0.343772	1.41026	1.0971	1.8128	0.00729035	0.203855
IL2RG	-0.129762	0.878305	0.798872	0.965636	0.0072968	0.203701
EGR3	-0.119058	0.887756	0.813796	0.968438	0.00730609	0.203627
OSTM1	0.392957	1.48135	1.11133	1.97457	0.00736525	0.204941
CHORDC1	0.302601	1.35337	1.08461	1.68874	0.00738307	0.205103
MORN5	-0.205952	0.813872	0.70001	0.946255	0.00739756	0.205171
TBC1D4	-0.222704	0.800352	0.679973	0.942042	0.00740876	0.205148
FAM86B1	-0.180781	0.834618	0.731111	0.952779	0.00745096	0.205982
NOS1AP	-0.124843	0.882635	0.805472	0.96719	0.00748014	0.206454
TMEM70	0.359792	1.43303	1.10088	1.86539	0.00748637	0.206292
MMP7	-0.0846966	0.918791	0.863451	0.977678	0.00753529	0.207306
CD247	-0.127056	0.880684	0.802314	0.966709	0.00754055	0.207116
TUBB2B	-0.109644	0.896153	0.826868	0.971244	0.0075701	0.207594
SPOCK2	-0.135405	0.873362	0.790743	0.964613	0.00757302	0.20734
ZAP70	-0.109644	0.896153	0.826854	0.971261	0.0075834	0.207292
GMFG	-0.224525	0.798896	0.677505	0.942036	0.00758382	0.206971
FXYD7	-0.208815	0.811545	0.696209	0.945988	0.00758709	0.20673
DTX1	-0.167139	0.846082	0.74835	0.956576	0.00761118	0.207056
HAUS2	0.380108	1.46244	1.1062	1.9334	0.0076173	0.206892
XG	0.158563	1.17183	1.043	1.31656	0.00761945	0.206622
FAU	-0.299191	0.741418	0.595135	0.923656	0.00762597	0.20647
KLF15	-0.136897	0.87206	0.788596	0.964358	0.00765299	0.206873
CFB	-0.0952682	0.909129	0.847652	0.975065	0.0076575	0.206668
CSNK1A1L	0.281953	1.32572	1.07759	1.63097	0.0076581	0.206357
CHPT1	-0.19977	0.818919	0.707014	0.948537	0.00770526	0.207301
TACR1	-0.107308	0.898249	0.830049	0.972053	0.00773241	0.207704
ZNF589	-0.374804	0.687424	0.521679	0.905827	0.00775413	0.207959
CD3E	-0.107426	0.898143	0.829822	0.97209	0.00778626	0.208493
TRAF3IP3	-0.167924	0.845418	0.747047	0.956742	0.00779969	0.208525
OR8B4	3.57806	35.8041	2.56523	499.733	0.00780456	0.208329
C14orf93	-0.428987	0.651168	0.474717	0.893206	0.00780605	0.208043
CHAD	-0.0669208	0.935269	0.890275	0.982538	0.007808	0.207771
GPR25	-0.29983	0.740944	0.59408	0.924115	0.00781067	0.207518
TCF7	-0.179063	0.836053	0.732699	0.953985	0.00782216	0.2075
EFHD2	-0.272906	0.761164	0.622408	0.930854	0.00786594	0.208337
PDCD1	-0.119294	0.887547	0.812794	0.969175	0.00787385	0.208224
RGS9	-0.117447	0.889188	0.815395	0.969659	0.00788375	0.208163
SNAPC2	-0.283926	0.752822	0.610566	0.928222	0.00788422	0.207853
THNSL2	-0.138126	0.870989	0.786605	0.964425	0.00789171	0.20773
BFSP1	0.197163	1.21794	1.05294	1.4088	0.00794386	0.20878
DSC3	-0.0740244	0.928649	0.879238	0.980836	0.00796368	0.208979
RPS6	-0.284717	0.752227	0.609537	0.928321	0.00797747	0.20902
HLA-DRB5	-0.127684	0.880131	0.800901	0.967199	0.00798057	0.20878
BLK	-0.105823	0.899584	0.831928	0.972741	0.00798361	0.20854
SELL	-0.127229	0.880532	0.801529	0.967322	0.00798578	0.208278
ACSL5	-0.162313	0.850175	0.754074	0.958524	0.00799895	0.208302
GPA33	-0.201108	0.817824	0.704857	0.948898	0.00801201	0.208324
LIPH	0.149451	1.1612	1.03965	1.29696	0.00806886	0.209483
PCDHGA12	0.157509	1.17059	1.04177	1.31534	0.00809942	0.209957
ENOSF1	-0.313922	0.730576	0.578979	0.921867	0.00815527	0.211084
MBOAT1	-0.19545	0.822465	0.711578	0.950631	0.0081652	0.211021
STK17A	-0.327665	0.720604	0.565252	0.918653	0.00817336	0.210912
TPD52	0.233632	1.26318	1.06231	1.50203	0.00819334	0.211108
SRD5A2	-0.15523	0.856218	0.763105	0.960692	0.00822585	0.211626
ZNF831	-0.114722	0.891614	0.818885	0.970802	0.00822875	0.211382
SEC14L3	-2.19044	0.111867	0.0220283	0.568099	0.00824208	0.211406
BCL3	-0.268136	0.764804	0.626831	0.933146	0.00825009	0.211294
UBD	-0.0866045	0.91704	0.859926	0.977947	0.00829882	0.212223
CDH22	-0.144905	0.865104	0.776804	0.963441	0.00834004	0.212958
GCGR	-0.33847	0.71286	0.554338	0.916715	0.0083491	0.212871
UTF1	-0.598406	0.549687	0.352318	0.857623	0.0083711	0.213113
LIFR	-0.161107	0.851201	0.755113	0.959516	0.00838425	0.21313
GRHL2	0.391822	1.47967	1.10564	1.98024	0.0084031	0.213291
RRM2B	0.263458	1.30142	1.0698	1.58319	0.00842039	0.213412
GNAI2	-0.428467	0.651507	0.473662	0.896128	0.00843278	0.213409
LRRC14B	0.106135	1.11197	1.02752	1.20336	0.0084465	0.21344
AK3	-0.392884	0.675107	0.503931	0.904428	0.0084578	0.213409
GSTT2	-0.121087	0.885957	0.809587	0.969532	0.00847056	0.213416
MRPL16	-0.427115	0.652389	0.474558	0.896858	0.00852953	0.214584
ITFG1	0.293593	1.34124	1.07751	1.66952	0.00858327	0.215618
ERCC1	-0.402532	0.668625	0.495232	0.902727	0.00858632	0.215378
SPATA4	-0.136612	0.872308	0.78781	0.96587	0.00858929	0.215136
KIF4B	0.20979	1.23342	1.05473	1.44238	0.00860712	0.215266
NIPA2	0.497103	1.64395	1.13455	2.38206	0.00861122	0.215053
ECHDC2	-0.248764	0.779764	0.647665	0.938806	0.00862072	0.214976
IFT172	-0.314606	0.730076	0.577289	0.923302	0.00863796	0.215092
SRP72	0.440746	1.55387	1.11816	2.15936	0.00866075	0.215345
PNRC2	-0.3942	0.674219	0.502264	0.905045	0.00868743	0.215694
DDAH2	-0.248373	0.780069	0.647938	0.939144	0.00871458	0.216053
ABHD14A	-0.247063	0.781091	0.649352	0.939557	0.00875425	0.216722
MARVELD1	0.253483	1.2885	1.06605	1.55738	0.008756	0.216451
CPB2	0.14509	1.15614	1.03725	1.28867	0.00878205	0.216781
FIBCD1	0.0911232	1.0954	1.02321	1.17269	0.00879943	0.216896
ICA1L	-0.184185	0.831782	0.724684	0.954709	0.008818	0.21704
GRIA3	0.125944	1.13422	1.0322	1.24633	0.00882186	0.216822
GSTM2P1	-0.288281	0.749551	0.604073	0.930065	0.00883158	0.216749
NDUFS1	0.404438	1.49846	1.10699	2.02837	0.00884758	0.216829
RIBC1	-0.168874	0.844616	0.744293	0.95846	0.00885508	0.216702
ADPRH	-0.302312	0.739108	0.589375	0.92688	0.00886134	0.216544
KLHDC7B	-0.10388	0.901334	0.83387	0.974256	0.00886963	0.216437
PYY2	-0.204092	0.815387	0.699765	0.950114	0.00890042	0.216878
CD226	-0.150566	0.860221	0.7684	0.963013	0.00893923	0.217513
CLNK	-0.259298	0.771593	0.635232	0.937227	0.00896556	0.217843
LACTB2	0.271754	1.31226	1.07026	1.60899	0.00898057	0.217897
CLDN11	-0.125308	0.882225	0.803061	0.969193	0.00899354	0.217902
L1CAM	0.0875985	1.09155	1.022	1.16583	0.00910841	0.220372
CHI3L1	-0.0836253	0.919776	0.863705	0.979487	0.00916582	0.221447
FAM81B	-0.111646	0.894361	0.822324	0.972709	0.00916611	0.221141
CDHR3	-0.120483	0.886492	0.809681	0.970589	0.00917298	0.220994
FRG2C	0.187995	1.20683	1.04767	1.39017	0.00917976	0.220845
AKNA	-0.224118	0.79922	0.675179	0.946051	0.00920231	0.221076
GRAMD1C	-0.184386	0.831614	0.723854	0.955418	0.00921262	0.221012
SNW1	-0.635436	0.529704	0.328332	0.854581	0.0092166	0.220797
MYO3A	-0.129135	0.878855	0.797417	0.96861	0.00924706	0.221216
SH2D1A	-0.105665	0.899726	0.830908	0.974243	0.00924891	0.22095
UPRT	0.459384	1.5831	1.12005	2.23759	0.00926449	0.221013
TMEM101	-0.174619	0.839777	0.736273	0.957831	0.00926977	0.22083
PTK2	0.334442	1.39716	1.08585	1.79773	0.00931321	0.221556
LYZL6	1.7028	5.4893	1.51933	19.8327	0.0093721	0.222646
LRRC23	-0.256788	0.773532	0.637286	0.938906	0.00938557	0.222656
HLA-F	-0.162956	0.849628	0.751331	0.960787	0.00938664	0.222372
SNORD115-7	1.6851	5.39302	1.51152	19.242	0.00941741	0.222792
KIR3DL2	-0.186434	0.829913	0.720891	0.955424	0.00947079	0.223744
COG8	0.462934	1.58873	1.11989	2.25385	0.00947095	0.223438
GGCX	0.393968	1.48285	1.10109	1.99697	0.00948454	0.22345
HES5	0.203175	1.22529	1.05089	1.42862	0.00949692	0.223433
SPATA24	-0.304892	0.737203	0.585457	0.928279	0.0095179	0.223618
SS18L2	-0.405476	0.666659	0.490671	0.905769	0.00951871	0.22333
RPGRIP1L	0.285731	1.33073	1.0722	1.65161	0.00953012	0.22329
PHF20L1	0.312766	1.3672	1.07928	1.73193	0.00953204	0.223029
EXOC1	0.521536	1.68461	1.1356	2.49904	0.0095432	0.222984
WDR38	-0.162122	0.850337	0.752202	0.961277	0.00956485	0.223184
MTHFS	-0.368417	0.691829	0.523562	0.914174	0.00956811	0.222955
SDC3	-0.253127	0.776369	0.641076	0.940216	0.0095709	0.222716
ZNF586	-0.355465	0.700848	0.535547	0.917169	0.00959922	0.223071
DTX3	-0.25054	0.778381	0.643912	0.94093	0.00962017	0.223253
CISD1	0.333007	1.39516	1.08412	1.79544	0.00966704	0.224036
TCHH	0.162096	1.17597	1.04008	1.32962	0.00967607	0.223941
PRKRIP1	-0.355559	0.700781	0.535293	0.917431	0.00968234	0.223783
INSIG2	0.364453	1.43973	1.0921	1.89801	0.00974353	0.224892
ATG12	0.527752	1.69512	1.13603	2.52936	0.00975065	0.224753
CLEC2D	-0.341641	0.710603	0.548382	0.920812	0.0097682	0.224853
C6orf163	-0.244092	0.783415	0.650995	0.942771	0.0097728	0.224656
CD2	-0.111612	0.894391	0.821754	0.973448	0.00980401	0.22507
AMY2B	-0.151443	0.859467	0.766149	0.964151	0.00980837	0.224867
MYO1D	0.297768	1.34685	1.07442	1.68836	0.00980846	0.224568
FAM200A	-0.426354	0.652885	0.472361	0.902401	0.00982703	0.224691
CD5	-0.112451	0.893641	0.820516	0.973283	0.00983189	0.224501
NGFR	-0.105465	0.899906	0.830642	0.974946	0.00985453	0.224718
CXCL2	-0.106704	0.898792	0.828822	0.974668	0.00986617	0.224682
CXCL3	-0.145599	0.864504	0.773987	0.965607	0.00987538	0.224592
ANXA8	-0.0763415	0.9265	0.874299	0.981817	0.009876	0.224307
MAP1LC3A	-0.206813	0.813172	0.694941	0.951518	0.00988269	0.224161
KLRC2	-0.147133	0.863179	0.771858	0.965305	0.00991208	0.224529
PSMD10	0.449718	1.56787	1.11397	2.20672	0.00991249	0.22424
RBMXL1	-0.443527	0.641769	0.458102	0.899073	0.0099237	0.224197
GAS2	-0.173714	0.840537	0.736535	0.959226	0.00994662	0.224417
OSBPL2	0.388906	1.47537	1.09759	1.98317	0.00996684	0.224576
CDC40	0.328637	1.38907	1.08184	1.78356	0.00997344	0.224429
RPL12	-0.291769	0.746941	0.598252	0.932585	0.00998849	0.224471
NKAP	0.521735	1.68495	1.13286	2.50609	0.00999918	0.224416
CCDC107	-0.251132	0.77792	0.642603	0.941731	0.0100035	0.224217
KDELR2	0.374171	1.45379	1.09356	1.93267	0.0100057	0.223972
RFX3	-0.18478	0.831287	0.722175	0.956885	0.0100572	0.224832
TEX19	0.11902	1.12639	1.02862	1.23345	0.0101954	0.227622
GUCY2D	-0.177333	0.837501	0.731513	0.958845	0.0102075	0.227594
HINT2	-0.302038	0.73931	0.587028	0.931095	0.0102685	0.228655
TIPARP	-0.242136	0.78495	0.652401	0.944429	0.010293	0.228902
VHL	0.318949	1.37568	1.0782	1.75524	0.0102998	0.228754
PRPF38B	-0.447821	0.639019	0.45385	0.899736	0.010313	0.228749
LRRC8D	-0.31441	0.73022	0.574244	0.928561	0.0103317	0.228866
PCDHGA2	0.125369	1.13357	1.02999	1.24756	0.0103348	0.228639
CD40	-0.208498	0.811802	0.692137	0.952157	0.0103924	0.229616
ZIC5	0.0877368	1.0917	1.02082	1.16751	0.0104218	0.229966
SULT4A1	-0.0937801	0.910483	0.847424	0.978234	0.0104399	0.230069
TTC29	-0.198998	0.819552	0.703773	0.954378	0.0104406	0.229788
PAOX	-0.273062	0.761046	0.617503	0.937956	0.010449	0.229676
CELSR2	-0.161561	0.850814	0.751817	0.962847	0.010472	0.229886
BAMBI	0.11776	1.12497	1.02797	1.23113	0.0104833	0.229838
TMC7	0.18956	1.20872	1.04539	1.39756	0.0104877	0.229639
WDR83	-0.254721	0.775133	0.637761	0.942094	0.0104885	0.229361
PHC1	-0.335612	0.7149	0.552743	0.92463	0.010558	0.230586
C2orf88	-0.15131	0.859582	0.765448	0.965292	0.0105608	0.230353
RAB18	0.347942	1.41615	1.08453	1.84918	0.0105867	0.230622
XCL1	-0.135284	0.873468	0.787398	0.968946	0.0105885	0.230367
BCL11B	-0.113593	0.892621	0.818155	0.973866	0.0105948	0.230212
FAM91A1	0.276004	1.31785	1.06628	1.62878	0.0106564	0.231255
GPR157	0.191753	1.21137	1.04555	1.40349	0.0106802	0.231476
YTHDF3	0.349624	1.41853	1.08441	1.85561	0.0107328	0.232322
EOMES	-0.112332	0.893748	0.819834	0.974325	0.0107557	0.232522
XCL2	-0.131826	0.876494	0.792044	0.969947	0.0107637	0.2324
RPS24	-0.30677	0.73582	0.581195	0.931582	0.0108097	0.233098
IL33	-0.0903268	0.913633	0.852319	0.979356	0.0108187	0.232998
TTC21A	-0.218077	0.804064	0.679902	0.9509	0.0108259	0.232859
MAP4K1	-0.136455	0.872445	0.785505	0.969008	0.0108415	0.232901
SCARNA16	-0.303972	0.737881	0.584009	0.932296	0.0108502	0.232796
SOCS1	-0.156416	0.855203	0.758215	0.964598	0.0108698	0.232922
MEA1	-0.380588	0.68346	0.509867	0.916155	0.0109056	0.233396
RPL28	-0.23494	0.790618	0.659779	0.947404	0.010918	0.233369
YME1L1	0.414002	1.51286	1.09986	2.08095	0.0109254	0.233236
DOK7	-0.0812632	0.921951	0.866016	0.981499	0.0109358	0.233164
PSMD7	0.344614	1.41145	1.0824	1.84051	0.010938	0.232921
DCAF12L2	-0.134813	0.873879	0.787644	0.969556	0.0109843	0.233616
BTLA	-0.113943	0.892309	0.817226	0.974291	0.0110621	0.234977
GADD45A	-0.235825	0.789919	0.658528	0.947525	0.0110637	0.234717
TMEM14C	-0.444396	0.641211	0.455087	0.903458	0.0110752	0.23467
MT1M	-0.128113	0.879754	0.796954	0.971156	0.0110753	0.234382
C6orf226	-0.239947	0.786669	0.653713	0.946666	0.0110791	0.234172
C12orf54	-0.352837	0.702691	0.535151	0.922683	0.0111163	0.234667
SLAMF6	-0.108029	0.897601	0.825734	0.975724	0.0111765	0.235645
IVL	0.0796427	1.0829	1.01826	1.15164	0.0112045	0.235944
SLCO1A2	-0.132551	0.875858	0.790574	0.970342	0.0112136	0.235845
SS18	-0.53285	0.58693	0.388766	0.886102	0.0112345	0.235994
RPS3	-0.268076	0.764849	0.621676	0.940995	0.011242	0.235861
TESC	-0.138016	0.871084	0.782908	0.969192	0.0112558	0.235861
NONO	0.521328	1.68426	1.12537	2.52071	0.0112733	0.235938
PPA2	0.429522	1.53652	1.1022	2.142	0.0112759	0.235702
SLC27A2	-0.0880624	0.915704	0.855401	0.980257	0.0112874	0.235653
CDK14	-0.207067	0.812965	0.692566	0.954295	0.0113409	0.23648
LAMP3	-0.107556	0.898026	0.82624	0.976049	0.0113979	0.237379
SYT8	-0.0837251	0.919684	0.861926	0.981312	0.011406	0.237258
ZNF765	0.320897	1.37836	1.0749	1.7675	0.0114304	0.237477
PANX1	0.36885	1.44607	1.08656	1.92453	0.0114314	0.237208
CFP	-0.143289	0.866504	0.77541	0.968299	0.0114586	0.237484
SFRP1	-0.0717763	0.930739	0.880349	0.984014	0.0114903	0.237852
MAT2A	0.484702	1.62369	1.11488	2.36471	0.0115077	0.237924
ZFC3H1	0.332308	1.39418	1.07737	1.80416	0.0115185	0.237858
CHMP6	-0.31828	0.727399	0.56825	0.931121	0.0115218	0.23764
RNF186	-0.169941	0.843715	0.739493	0.962626	0.0115309	0.237539
THSD7B	-0.118269	0.888457	0.810528	0.973879	0.0115679	0.238014
GTPBP1	-0.439845	0.644136	0.457821	0.906275	0.0115733	0.237838
RGL3	-0.0927204	0.911448	0.848142	0.97948	0.0115873	0.23784
FAM114A1	0.271332	1.31171	1.06252	1.61934	0.0115988	0.237789
ANO6	0.34028	1.40534	1.07889	1.83057	0.0116371	0.238289
TSGA10	-0.240269	0.786416	0.652492	0.947828	0.0116521	0.238309
CYP4F12	-0.0996172	0.905184	0.837752	0.978044	0.0116681	0.23835
SIRPG	-0.106488	0.898986	0.827575	0.976559	0.0116804	0.238316
RPL36AL	-0.335811	0.714758	0.550538	0.927964	0.0116929	0.238286
CXCL6	-0.137362	0.871654	0.783338	0.969928	0.0117307	0.238771
CADM4	-0.18929	0.827547	0.714254	0.95881	0.0117384	0.238643
HNRNPA1	-0.450512	0.637302	0.448911	0.904754	0.0117421	0.238435
RTN4IP1	0.2477	1.28108	1.05655	1.55332	0.0117541	0.238394
FCRL3	-0.100915	0.90401	0.835735	0.977862	0.0117784	0.238603
ZNF382	-0.222951	0.800154	0.672669	0.9518	0.0118072	0.238904
PDLIM4	-0.143413	0.866396	0.774875	0.968727	0.0118105	0.238688
P2RX1	-0.129446	0.878582	0.794301	0.971805	0.011876	0.239727
LRRC2	-0.15349	0.857709	0.761002	0.966707	0.0119129	0.240187
ZNF75D	0.382662	1.46618	1.08796	1.97589	0.0119444	0.240539
LELP1	2.38567	10.8664	1.69041	69.8518	0.0119731	0.240831
LDLRAD3	-0.167925	0.845418	0.741598	0.963771	0.0120059	0.241207
CDHR1	-0.125736	0.881847	0.799429	0.972763	0.01202	0.241206
ZNF250	0.318383	1.3749	1.07241	1.76272	0.0120245	0.241014
BIN3	-0.293885	0.745362	0.592568	0.937554	0.0120435	0.241111
NGB	0.135417	1.14501	1.03013	1.27272	0.0120678	0.241313
LIME1	-0.1345	0.874153	0.786964	0.971001	0.012111	0.241894
CCDC17	-0.186041	0.83024	0.717884	0.96018	0.0121527	0.242444
LGR6	-0.0829444	0.920402	0.862626	0.982049	0.0121552	0.242209
PLXNB3	0.164274	1.17854	1.03645	1.34011	0.0122076	0.24297
ADORA3	0.21548	1.24046	1.04807	1.46817	0.012213	0.242793
CD1E	-0.101881	0.903137	0.833962	0.97805	0.0122153	0.242558
CXCL14	-0.0801798	0.92295	0.866839	0.982693	0.0122278	0.242522
STAR	-0.160552	0.851674	0.751115	0.965695	0.0122627	0.242932
OXR1	0.248994	1.28273	1.05562	1.55871	0.012265	0.242696
ZBTB17	-0.319262	0.726685	0.566022	0.932951	0.0122669	0.242453
CXorf65	-0.237963	0.788232	0.654229	0.949683	0.0123143	0.243109
TTC32	-0.250721	0.778239	0.639514	0.947058	0.0123146	0.242832
HYAL3	-0.240629	0.786133	0.651105	0.949164	0.012329	0.242836
MFAP3L	0.146507	1.15778	1.03223	1.29861	0.0123612	0.24319
ABCB7	0.472646	1.60423	1.10774	2.32325	0.0123658	0.242999
RPSAP58	-0.333531	0.71639	0.551618	0.93038	0.012381	0.243018
EIF4E	0.401492	1.49405	1.09071	2.04654	0.0123904	0.242923
DNAH9	-0.125244	0.882282	0.799789	0.973283	0.0123965	0.242764
RSPH1	-0.113537	0.892671	0.816601	0.975828	0.0124754	0.244028
TMEM91	-0.20072	0.818141	0.698921	0.957698	0.0124952	0.244136
LTK	-0.154641	0.856723	0.758818	0.96726	0.0125036	0.244021
CD96	-0.108342	0.897321	0.824169	0.976965	0.0125218	0.244097
FBXO6	-0.259256	0.771625	0.629546	0.945769	0.0125259	0.243898
FLRT1	-0.191319	0.825869	0.710705	0.959693	0.0125285	0.24367
RPL34	-0.273363	0.760817	0.613824	0.94301	0.0125718	0.244234
ZNF672	-0.408423	0.664698	0.482276	0.916121	0.0125893	0.244296
GAPVD1	0.398296	1.48928	1.08917	2.03639	0.0125948	0.244124
ZNF26	-0.391481	0.676055	0.497054	0.919518	0.0126085	0.244113
SDC1	0.183137	1.20098	1.03995	1.38695	0.0126586	0.244804
MBTPS2	0.293517	1.34114	1.06479	1.68921	0.0126601	0.244556
DDAH1	-0.223855	0.799431	0.670404	0.953291	0.0126808	0.244679
LRRC4C	-0.107837	0.897774	0.824772	0.977238	0.0127003	0.244778
ZFP28	-0.220958	0.80175	0.673845	0.953933	0.012709	0.24467
ZNF28	0.303813	1.35502	1.06695	1.72086	0.0127244	0.244691
ZNF404	-0.219971	0.802542	0.675009	0.954171	0.0127291	0.244504
SLCO6A1	0.272154	1.31279	1.05974	1.62627	0.0127377	0.244395
TP53TG1	-0.188549	0.82816	0.713932	0.960664	0.0127775	0.244883
MYBPC2	-0.155036	0.856385	0.757968	0.96758	0.0128068	0.245168
UBASH3A	-0.107446	0.898125	0.825209	0.977485	0.0128797	0.246287
SMARCD3	-0.185747	0.830484	0.717301	0.961526	0.0129624	0.247592
ZNF648	-0.129346	0.87867	0.793384	0.973123	0.0130295	0.248595
DIRC3	0.172769	1.18859	1.03706	1.36227	0.013031	0.248347
BCAS3	0.313364	1.36802	1.06822	1.75195	0.0130321	0.248089
ZNF750	0.138896	1.149	1.02968	1.28216	0.0130368	0.247902
RPLP2	-0.25173	0.777454	0.637339	0.948373	0.0130368	0.247626
C10orf67	-0.203676	0.815726	0.694567	0.958021	0.0130385	0.247384
ADAM20	-0.303635	0.73813	0.580796	0.938085	0.013045	0.247232
ACSF2	-0.158758	0.853203	0.752687	0.967141	0.0130502	0.247057
CCDC74A	-0.102791	0.902316	0.831971	0.978609	0.0130607	0.246981
PRKCB	-0.112826	0.893306	0.817157	0.976551	0.0130674	0.246833
VPS41	0.384643	1.46909	1.08424	1.99055	0.0130726	0.246659
LSP1	-0.179863	0.835385	0.72476	0.962896	0.0130776	0.24648
PSMD2	0.37616	1.45668	1.08228	1.9606	0.0130788	0.246231
SERINC3	0.326469	1.38606	1.071	1.79382	0.0130912	0.246193
EML3	-0.332035	0.717462	0.551903	0.932685	0.0131163	0.246393
KIR2DS4	-0.221066	0.801664	0.673143	0.954722	0.0131493	0.246741
ZNF230	-0.32108	0.725365	0.562724	0.935013	0.0131862	0.247161
ZNF789	-0.280059	0.755739	0.605581	0.94313	0.0132107	0.247348
CD7	-0.114742	0.891596	0.814227	0.976317	0.0132318	0.247473
ZNF358	-0.26244	0.769173	0.624949	0.946681	0.0132435	0.247419
TATDN1	0.274959	1.31648	1.05908	1.63643	0.0132472	0.247218
OR5D14	3.50259	33.2015	2.07723	530.676	0.0132518	0.247033
EDAR	-0.145153	0.86489	0.771002	0.970212	0.0132955	0.247578
CD48	-0.140691	0.868758	0.777172	0.971136	0.0133141	0.247655
RIMKLB	-0.274349	0.760067	0.611599	0.944576	0.0133538	0.248122
FAM98B	0.378008	1.45938	1.08168	1.96895	0.0133687	0.248129
NUB1	-0.476166	0.62116	0.425915	0.905909	0.0133902	0.248257
RFNG	-0.302191	0.739197	0.58175	0.939255	0.0134071	0.248301
PNKD	-0.268696	0.764375	0.617725	0.94584	0.0134248	0.24836
NOP14	0.471613	1.60258	1.10262	2.32924	0.0134362	0.248301
CD207	-0.0987619	0.905958	0.837699	0.97978	0.0134707	0.248669
HLA-DQB1	-0.133105	0.875373	0.787641	0.972877	0.0135001	0.248942
HLA-DPB2	-0.151704	0.859243	0.761788	0.969165	0.0135156	0.248959
TNFRSF8	-0.15031	0.860441	0.763686	0.969455	0.0135243	0.24885
PSCA	0.0721187	1.07478	1.01498	1.13811	0.0135511	0.249074
ATCAY	0.164444	1.17874	1.03448	1.34311	0.0135522	0.248826
SAA4	-0.112726	0.893395	0.81691	0.977041	0.0135642	0.248779
UBQLN2	0.446962	1.56355	1.09642	2.22972	0.013576	0.248729
ACAA1	-0.302205	0.739187	0.581464	0.939692	0.013589	0.248699
PTPN6	-0.29557	0.744108	0.588392	0.941033	0.0136132	0.248875
OMG	-0.276169	0.758685	0.609221	0.944818	0.0136238	0.248802
GBP1	-0.139063	0.870173	0.779125	0.971861	0.0136581	0.249162
DAPK2	-0.206241	0.813637	0.690628	0.958557	0.0136603	0.248935
LRRN1	-0.0917791	0.912307	0.848123	0.981347	0.0136691	0.24883
OR5AU1	0.279414	1.32235	1.05898	1.65123	0.0136744	0.248661
HLA-H	-0.166014	0.847034	0.742283	0.966568	0.0137082	0.24901
MYD88	-0.410724	0.66317	0.478391	0.919319	0.0137094	0.248766
ADK	0.360953	1.4347	1.07662	1.91187	0.0137439	0.249129
ANKRD53	-0.167031	0.846173	0.740883	0.966427	0.0137529	0.249027
BATF	-0.134405	0.874235	0.785542	0.972943	0.0137967	0.249555
KCNH8	-0.111585	0.894415	0.818405	0.977486	0.0137972	0.2493
ATP6V1C1	0.290756	1.33744	1.06113	1.68569	0.0137973	0.249037
SNORA57	-0.340663	0.711299	0.542365	0.932851	0.0138012	0.248844
ZBBX	-0.163433	0.849224	0.745604	0.967244	0.0138323	0.249143
SSTR5	0.156217	1.16908	1.03234	1.32392	0.0138332	0.248895
CD79B	-0.113393	0.892799	0.815716	0.977168	0.0138431	0.248811
APOD	-0.0835129	0.919879	0.860687	0.983142	0.0138559	0.248779
LRGUK	-0.136674	0.872254	0.782281	0.972576	0.0138709	0.248787
PHYHIPL	-0.128418	0.879485	0.793943	0.974244	0.0139031	0.249103
HSPH1	0.257295	1.29343	1.05363	1.5878	0.0139213	0.249166
PROM2	0.253328	1.28831	1.05256	1.57686	0.0140224	0.250712
RAB1A	0.538196	1.71291	1.11488	2.63173	0.0140381	0.25073
CCR7	-0.109313	0.89645	0.821541	0.978188	0.0140769	0.25116
VWA2	-0.0821661	0.921119	0.862625	0.983579	0.0141042	0.251385
BRD4	-0.423804	0.654552	0.466605	0.918204	0.0141232	0.251462
CAND1	0.308849	1.36186	1.06412	1.7429	0.0141394	0.251486
GREB1L	-0.0876834	0.916051	0.854079	0.982519	0.0141507	0.251426
TUBGCP5	0.398574	1.4897	1.08332	2.04853	0.0141926	0.251908
FAM199X	0.336491	1.40003	1.06983	1.83214	0.0142155	0.252052
IL22RA1	-0.133985	0.874603	0.785742	0.973514	0.0142455	0.252321
THEMIS	-0.110201	0.895654	0.820081	0.978191	0.0142768	0.252613
SOX10	-0.0553763	0.946129	0.90512	0.988997	0.0143113	0.252961
XKR7	0.124065	1.13209	1.02509	1.25026	0.0143209	0.252869
CEACAM1	-0.132182	0.876181	0.788226	0.97395	0.0143257	0.252693
ABCG4	0.262144	1.29971	1.05371	1.60315	0.0143378	0.252644
FBLN5	-0.169394	0.844176	0.737125	0.966775	0.0143514	0.252622
INPP1	-0.259253	0.771628	0.626866	0.94982	0.0144604	0.25428
POLL	-0.359895	0.69775	0.522906	0.931055	0.014471	0.254204
JAK1	-0.301625	0.739615	0.58078	0.94189	0.0144729	0.253976
WAS	-0.179336	0.835825	0.723877	0.965085	0.014511	0.254382
RGPD8	0.120731	1.12832	1.02419	1.24304	0.0145304	0.254461
DNAJC13	0.392414	1.48055	1.08069	2.02836	0.014562	0.254753
NACAD	-0.141388	0.868152	0.775038	0.972454	0.0145862	0.254914
CHD5	0.115111	1.122	1.02299	1.23059	0.0145981	0.254862
UBE2L6	-0.207183	0.812871	0.688335	0.959939	0.014613	0.254861
UBE2G1	0.45403	1.57464	1.09372	2.26703	0.0146158	0.254649
CCT4	0.388754	1.47514	1.07971	2.0154	0.014621	0.25448
RABGAP1	0.446322	1.56255	1.09185	2.23618	0.0146684	0.255045
PSORS1C3	-0.351768	0.703444	0.530306	0.933109	0.0146774	0.254942
FKBP5	-0.152682	0.858403	0.759327	0.970406	0.0146847	0.254809
MAP3K4	0.391144	1.47867	1.07992	2.02466	0.0147083	0.254959
APOL2	-0.253231	0.776288	0.633337	0.951505	0.0147406	0.255259
DCUN1D4	0.418356	1.51946	1.08558	2.12675	0.0147429	0.25504
CR1L	-0.18503	0.831079	0.716142	0.964464	0.0148338	0.256353
ZNF470	-0.223439	0.799764	0.668167	0.957278	0.014852	0.256408
ZNF620	-0.228224	0.795946	0.662371	0.956458	0.0148943	0.256878
COPS6	-0.414927	0.660389	0.472832	0.922343	0.0149244	0.257137
VIT	-0.100774	0.904137	0.833671	0.98056	0.0149265	0.256913
WDR55	0.460016	1.5841	1.09372	2.29434	0.0149342	0.256786
IFT57	-0.308013	0.734906	0.573439	0.941837	0.0149593	0.256959
ING2	-0.364394	0.694617	0.517929	0.931582	0.0149663	0.256822
CD69	-0.117334	0.889288	0.809056	0.977476	0.0150075	0.257269
ANKRD55	-0.160996	0.851296	0.747709	0.969233	0.0150145	0.257131
WDR72	-0.0725766	0.929995	0.877152	0.986021	0.015031	0.257156
RAD54B	0.194871	1.21515	1.03852	1.42184	0.0150354	0.256973
AMPD1	-0.125685	0.881892	0.796908	0.975939	0.0150554	0.257056
PYHIN1	-0.105124	0.900213	0.827046	0.979853	0.0150772	0.257171
RAD1	0.415846	1.51565	1.08383	2.11953	0.015081	0.256979
AP3M1	0.355746	1.42724	1.07115	1.90173	0.015128	0.257523
SNAP91	-0.13508	0.873646	0.783436	0.974244	0.0151311	0.25732
SLC16A11	-0.118587	0.888174	0.807123	0.977365	0.0151444	0.257289
HEATR3	0.284635	1.32928	1.05648	1.67252	0.0151502	0.257132
CCDC146	-0.196282	0.82178	0.701349	0.962892	0.0151969	0.257668
SLC6A1	0.189451	1.20859	1.03714	1.40837	0.0152161	0.257736
RLN1	-0.205035	0.814619	0.690234	0.961419	0.0152921	0.258767
TUBA3C	-0.113487	0.892716	0.814478	0.978469	0.0153053	0.258734
MYO15B	-0.144233	0.865686	0.770419	0.972733	0.01532	0.258726
RASAL3	-0.158769	0.853193	0.75043	0.970028	0.0153216	0.258497
XPOT	0.271707	1.3122	1.05343	1.63454	0.0153316	0.25841
LRRTM3	0.177132	1.19379	1.03448	1.37763	0.0153596	0.258627
MOAP1	-0.307832	0.735039	0.573062	0.942799	0.0153618	0.258408
LIN7C	-0.416358	0.659444	0.470874	0.923531	0.0153976	0.258755
NTRK2	-0.102228	0.902823	0.831126	0.980706	0.0154597	0.259543
RPLP0	-0.319324	0.72664	0.561122	0.940982	0.0154692	0.259447
TNFAIP8	-0.231231	0.793556	0.658078	0.956926	0.0154803	0.259379
ZNF362	-0.390909	0.676442	0.492911	0.928309	0.0154944	0.259361
CNGA2	0.0966963	1.10153	1.01857	1.19124	0.0154992	0.259187
PFN4	-0.210351	0.810299	0.683348	0.960836	0.0155423	0.259652
NUP155	0.237436	1.26799	1.04601	1.53708	0.0156026	0.260404
PSMD1	0.452281	1.57189	1.08944	2.26799	0.015608	0.26024
SHMT2	0.298452	1.34777	1.0581	1.71674	0.0156312	0.260373
KIAA1755	-0.127296	0.880473	0.794128	0.976207	0.0156393	0.260253
DUS1L	-0.278381	0.757008	0.604033	0.948725	0.0156506	0.260187
THOC1	-0.379044	0.684515	0.503366	0.930856	0.015657	0.26004
ICAM4	-0.17181	0.842139	0.73259	0.96807	0.0156768	0.260116
CCDC160	-0.100782	0.90413	0.833156	0.98115	0.0156833	0.259972
LARP1	0.427985	1.53416	1.08405	2.17118	0.0157175	0.260284
RPS15	-0.226554	0.797276	0.663354	0.958236	0.01575	0.26057
SERTAD1	-0.272448	0.761513	0.61041	0.950021	0.0157651	0.260567
YIPF4	0.432185	1.54062	1.08473	2.18812	0.0157663	0.260334
NOS1	0.151378	1.16344	1.02882	1.31566	0.0158272	0.261087
SGSH	-0.367249	0.692637	0.513894	0.93355	0.0158886	0.261848
PDHA2	0.773246	2.16679	1.15566	4.0626	0.0159064	0.261888
CRISP3	0.0546415	1.05616	1.01028	1.10413	0.0159073	0.261649
C1GALT1C1	0.39312	1.4816	1.07622	2.03965	0.0159365	0.261878
RAB4B	-0.281473	0.754671	0.600247	0.948824	0.015966	0.262109
STT3A	0.358385	1.43102	1.06917	1.91532	0.0159663	0.261863
HEPACAM	-0.118011	0.888686	0.807342	0.978226	0.0159776	0.261797
PTPN7	-0.135065	0.873659	0.782689	0.975202	0.0160588	0.262874
CYP2D6	-0.142393	0.86728	0.77233	0.973904	0.0160868	0.26308
CC2D1B	-0.432168	0.649101	0.456538	0.922884	0.0160878	0.262845
CAMK2B	-0.091502	0.91256	0.847032	0.983156	0.0160933	0.262682
TNFSF12-TNFSF13	-0.0707181	0.931725	0.879569	0.986973	0.0161236	0.262926
SNRNP35	-0.302518	0.738955	0.577541	0.945481	0.0161373	0.262898
GADL1	0.213786	1.23836	1.04031	1.47411	0.0161961	0.263604
RDH16	0.104572	1.11024	1.0195	1.20905	0.0162202	0.263745
SEC14L5	-0.140876	0.868597	0.7743	0.974377	0.016276	0.264399
TMEM71	-0.124268	0.883143	0.797974	0.977402	0.0163177	0.264825
TMEM163	-0.148962	0.861602	0.762899	0.973075	0.0164111	0.266087
CYTIP	-0.131476	0.8768	0.787484	0.976247	0.0164616	0.266653
COL6A6	-0.100146	0.904705	0.833612	0.981861	0.0164687	0.266516
RBM41	0.318628	1.37524	1.05996	1.7843	0.0164736	0.266342
CLEC6A	-0.199456	0.819176	0.695942	0.964232	0.0164919	0.266385
SIRT7	-0.297951	0.742337	0.581829	0.947124	0.0165297	0.266743
CYBA	-0.15519	0.856253	0.754196	0.972119	0.0165452	0.26674
CXCR3	-0.109013	0.896719	0.820236	0.980333	0.0165461	0.266503
NRG1	-0.100265	0.904598	0.833375	0.981908	0.016561	0.266491
TTC22	-0.0957752	0.908668	0.8402	0.982716	0.0165679	0.266351
CXCL16	-0.236835	0.789121	0.650136	0.957819	0.0165772	0.26625
U2AF1L4	-0.289982	0.748277	0.590257	0.948601	0.0165777	0.266007
PABPN1	-0.392635	0.675275	0.489707	0.931163	0.01662	0.266435
PTPRZ1	-0.0748317	0.9279	0.872777	0.986504	0.0166285	0.266321
JUND	-0.219887	0.802609	0.670403	0.960887	0.0166462	0.266355
BEGAIN	-0.137149	0.87184	0.77917	0.975533	0.0167569	0.267875
JRKL	0.190478	1.20983	1.03499	1.41421	0.0167678	0.267799
EIF4G1	0.422291	1.52545	1.079	2.15663	0.0168313	0.268561
MICAL1	-0.225586	0.798048	0.663271	0.960212	0.0168416	0.268474
ZC3H14	-0.43564	0.64685	0.452542	0.924589	0.0168419	0.268228
NEFH	-0.114314	0.891978	0.812157	0.979644	0.0168512	0.268126
RPS19	-0.23041	0.794208	0.657451	0.959412	0.0168621	0.26805
CIITA	-0.133047	0.875424	0.784846	0.976456	0.0169626	0.269396
RPS16	-0.276312	0.758577	0.60456	0.95183	0.0170176	0.270018
ACADM	-0.257749	0.772789	0.625347	0.954994	0.0170183	0.269778
STAB2	-0.132633	0.875786	0.785375	0.976605	0.0170426	0.269912
BTN3A3	-0.204855	0.814766	0.688547	0.964122	0.0170598	0.269934
FGD3	-0.114255	0.89203	0.812087	0.979843	0.0170779	0.26997
SGK3	-0.16834	0.845066	0.735876	0.970458	0.0170893	0.269901
EGR2	-0.145143	0.864898	0.767641	0.974478	0.0170912	0.269681
MRPS18C	0.45602	1.57778	1.08456	2.2953	0.0171068	0.269677
DHX15	0.425002	1.52959	1.07849	2.16939	0.0171371	0.269906
HMSD	-0.210328	0.810319	0.681629	0.963304	0.017141	0.269718
AIMP1	0.355292	1.4266	1.06516	1.91069	0.0171537	0.26967
C19orf54	-0.328563	0.719958	0.549492	0.943305	0.0171566	0.269467
APOA1	-0.145679	0.864435	0.766822	0.974473	0.0171746	0.2695
ST3GAL1	0.196635	1.2173	1.03543	1.43112	0.0172365	0.270224
PPP1R16B	-0.127257	0.880508	0.79293	0.977758	0.0172761	0.270596
PHF21A	-0.48386	0.6164	0.413872	0.918035	0.0172775	0.270369
KRT6B	-0.0549814	0.946503	0.904615	0.99033	0.0172786	0.270138
EIF3F	-0.377312	0.685702	0.502515	0.935667	0.0173467	0.270955
RING1	-0.338935	0.712529	0.538885	0.942125	0.0173928	0.271427
ENOX2	0.357997	1.43046	1.06494	1.92144	0.0174115	0.27147
LST1	-0.173468	0.840744	0.728668	0.970059	0.0174821	0.272322
PNPLA5	-0.323785	0.723406	0.553864	0.944846	0.0174852	0.272121
DLAT	0.351419	1.42108	1.06329	1.89928	0.0175666	0.273139
PAK1	-0.250718	0.778242	0.632695	0.957271	0.0176278	0.273841
TRMT2A	-0.281504	0.754648	0.598109	0.952157	0.0176309	0.273641
LRAT	-0.0885122	0.915292	0.850759	0.98472	0.0176577	0.273807
ABHD8	-0.263568	0.768306	0.617969	0.955216	0.0176743	0.273815
RDH14	-0.461416	0.63039	0.430567	0.92295	0.0176837	0.273712
IGFBP6	-0.146201	0.863984	0.765572	0.975046	0.0178106	0.275427
FCRL6	-0.127211	0.880548	0.792577	0.978282	0.0178441	0.275694
B4GALNT2	0.0858129	1.0896	1.01492	1.16978	0.0178512	0.275554
NGDN	-0.469035	0.625605	0.42433	0.922352	0.0178823	0.275785
IMMT	0.514263	1.67241	1.09263	2.55983	0.0178927	0.275696
POM121L1P	-0.295731	0.743988	0.582421	0.950374	0.0179118	0.275742
ROPN1	-0.0728962	0.929697	0.875246	0.987536	0.0179195	0.275611
RGS1	-0.126459	0.88121	0.793606	0.978486	0.0179299	0.275522
C5orf60	-0.396347	0.672773	0.484513	0.934182	0.0179583	0.275712
TP53I11	0.270746	1.31094	1.04761	1.64047	0.0179584	0.275464
TAF9B	0.319031	1.37579	1.05625	1.79202	0.017994	0.275763
EMID1	-0.11102	0.89492	0.816188	0.981248	0.018135	0.277675
PEX3	0.329239	1.38991	1.0576	1.82663	0.0181907	0.278276
STAT5A	-0.215376	0.806238	0.674271	0.964033	0.018196	0.278109
KCTD17	-0.230461	0.794167	0.655822	0.961696	0.0182797	0.279137
RPL19	-0.243241	0.784082	0.640628	0.95966	0.0183064	0.279295
HIPK2	-0.178402	0.836606	0.721312	0.970328	0.0183689	0.279999
ZCCHC17	-0.417465	0.658715	0.465568	0.93199	0.0183857	0.280004
GIMAP7	-0.154752	0.856628	0.753218	0.974235	0.0183915	0.279844
PCSK9	-0.10989	0.895933	0.817706	0.981643	0.0184025	0.279761
STC2	-0.083618	0.919783	0.858005	0.986009	0.0184153	0.279706
LSG1	0.412819	1.51107	1.0718	2.13036	0.0184898	0.280587
PBX4	-0.14507	0.864962	0.7666	0.975944	0.0185076	0.280608
VSIG1	-0.133149	0.875334	0.783523	0.977904	0.018513	0.280441
ANO9	-0.14942	0.861207	0.760495	0.975258	0.0185328	0.280492
CSTA	-0.11853	0.888225	0.804765	0.980341	0.0185553	0.280584
ACCSL	0.787952	2.19889	1.14105	4.23743	0.0185634	0.280457
RAP1GAP2	0.180677	1.19803	1.0307	1.39253	0.0185795	0.280452
CLOCK	0.188813	1.20781	1.03208	1.41348	0.0185974	0.280474
RPS25	-0.275807	0.75896	0.603203	0.954935	0.0186008	0.280278
ICOSLG	0.202252	1.22416	1.03438	1.44876	0.0186122	0.280202
ITGA10	-0.128829	0.879124	0.789661	0.978723	0.0186369	0.280325
KDM4B	-0.172893	0.841228	0.728381	0.971558	0.0186434	0.280177
TMEM41A	0.415813	1.5156	1.07184	2.1431	0.0186507	0.28004
MAX	-0.468618	0.625867	0.423545	0.924834	0.0186636	0.279986
DHRS7	-0.283733	0.752968	0.594422	0.953802	0.0186698	0.279834
SLC39A8	-0.178361	0.836641	0.721053	0.970758	0.0187137	0.280245
PCP2	-0.0949788	0.909392	0.840133	0.984361	0.018776	0.280932
ENKUR	-0.136669	0.872259	0.778276	0.977592	0.0187945	0.280962
EZR	0.302217	1.35285	1.05139	1.74076	0.0187966	0.280747
SLC47A2	-0.207294	0.812781	0.68371	0.966217	0.0187996	0.280547
C16orf54	-0.125792	0.881799	0.793949	0.979368	0.0188079	0.280426
EXD1	0.218664	1.24441	1.03687	1.4935	0.0188278	0.280477
C11orf21	-0.135402	0.873365	0.780059	0.977832	0.0188321	0.280296
CLTA	-0.395322	0.673463	0.48418	0.936742	0.018869	0.280601
NSF	0.293205	1.34072	1.04965	1.71249	0.0188724	0.280406
ESRRG	-0.0919698	0.912133	0.84471	0.984937	0.0189075	0.280684
ASTL	-0.163139	0.849473	0.741254	0.973493	0.0189583	0.281192
NOMO2	0.241612	1.2733	1.04059	1.55805	0.0189585	0.280952
RLN2	-0.103845	0.901365	0.826461	0.983058	0.0189767	0.280978
NKG7	-0.107597	0.89799	0.820771	0.982473	0.0190059	0.281166
UBQLN1	0.385635	1.47055	1.06542	2.02972	0.019008	0.280953
GLIPR1	-0.209505	0.810986	0.68073	0.966166	0.0190135	0.280791
HBZ	-0.558456	0.572092	0.358711	0.912404	0.0190331	0.280837
TRIP6	-0.163482	0.849182	0.740709	0.97354	0.0190504	0.280849
RPSA	-0.289678	0.748505	0.587522	0.953598	0.0190519	0.280629
NPHP1	-0.182466	0.833213	0.715333	0.970519	0.0190546	0.280427
ANO7	-0.183002	0.832766	0.71455	0.97054	0.0191413	0.28146
AAK1	0.385711	1.47066	1.06495	2.03093	0.0191776	0.281751
GDF5	-0.102858	0.902255	0.827837	0.983362	0.0191822	0.281575
APOM	-0.172278	0.841745	0.728689	0.972342	0.0192265	0.281984
UCP3	-0.206642	0.813311	0.684079	0.966956	0.0192547	0.282155
SERPINB9	-0.178635	0.836411	0.720185	0.971394	0.0192749	0.282208
RNASE9	1.25815	3.51891	1.22663	10.0949	0.0192911	0.282203
RNF4	0.509413	1.66431	1.08613	2.55029	0.0193156	0.282319
TMEM190	-0.178092	0.836865	0.720832	0.971576	0.0193553	0.282658
RACGAP1	0.21254	1.23682	1.035	1.47799	0.0193642	0.282545
RPS13	-0.308107	0.734837	0.567539	0.95145	0.0194108	0.282983
MFSD6L	-0.0949139	0.909451	0.839831	0.984843	0.0195003	0.284045
LRRC43	-0.12596	0.88165	0.793208	0.979954	0.0195222	0.284121
POLR2C	0.387127	1.47274	1.06406	2.03839	0.0195762	0.284664
CD8B	-0.100815	0.904101	0.830722	0.983961	0.0195774	0.284439
PCDHB8	0.102433	1.10786	1.01656	1.20737	0.0195862	0.284325
WNT11	-0.100169	0.904684	0.831694	0.98408	0.019603	0.284326
SIT1	-0.103066	0.902067	0.82725	0.983651	0.0196418	0.284648
SPHKAP	-0.108616	0.897075	0.818841	0.982783	0.019649	0.284511
CDKN1C	-0.162214	0.85026	0.741928	0.974409	0.0196601	0.284429
PTGS2	-0.102573	0.902513	0.827989	0.983744	0.0196636	0.284239
TP73	-0.126125	0.881504	0.792832	0.980094	0.019718	0.284784
CLUL1	-0.107845	0.897767	0.819936	0.982985	0.0197599	0.285147
APOBEC4	-0.169132	0.844397	0.732451	0.973453	0.0197674	0.285015
RLIM	0.400497	1.49257	1.06576	2.0903	0.0197755	0.284891
PPAT	0.271898	1.31245	1.04416	1.64968	0.0197888	0.284842
SHBG	-0.249839	0.778926	0.631302	0.961071	0.019789	0.284604
CLDN25	-0.213294	0.807919	0.675229	0.966683	0.0197987	0.284504
DYNLT1	0.313054	1.3676	1.05083	1.77984	0.019869	0.285274
ROPN1B	-0.0764395	0.926409	0.868646	0.988013	0.0199603	0.286344
COCH	-0.0862012	0.91741	0.853161	0.986497	0.0199673	0.286203
APOL3	-0.162423	0.850081	0.741328	0.974788	0.0200414	0.287025
HLCS	0.33192	1.39364	1.05357	1.84349	0.0200421	0.286793
LIPT1	-0.402296	0.668782	0.476471	0.938714	0.0200421	0.286553
TMC3	-0.108813	0.896898	0.818302	0.983044	0.0200481	0.286399
KIF19	-0.109527	0.896258	0.817216	0.982944	0.0200626	0.286366
SYS1-DBNDD2	0.180605	1.19794	1.02876	1.39494	0.0200702	0.286236
CYTH1	-0.353444	0.702265	0.521316	0.946022	0.0200731	0.286038
AASS	-0.167078	0.846134	0.734907	0.974195	0.0201496	0.286888
ARHGEF3	-0.253723	0.775907	0.626374	0.961137	0.0201871	0.287182
HNRNPD	-0.460988	0.63066	0.427364	0.930663	0.0202385	0.287673
FASLG	-0.111207	0.894754	0.814558	0.982844	0.0202788	0.288007
EML1	0.209069	1.23253	1.03302	1.47057	0.0203081	0.288183
MYEOV	-0.0856385	0.917926	0.853873	0.986784	0.0203158	0.288052
STARD3NL	0.434451	1.54412	1.06974	2.22885	0.0203423	0.288188
MAL	-0.108449	0.897224	0.818672	0.983313	0.0203443	0.287978
TMEM65	0.203077	1.22517	1.032	1.45448	0.0203497	0.287815
HDAC2	0.259311	1.29604	1.04104	1.61349	0.0203508	0.287592
AIFM1	0.377546	1.4587	1.06028	2.00683	0.0203619	0.287511
ALOX15B	-0.0758701	0.926937	0.869372	0.988313	0.0203757	0.287468
ZC3H12A	-0.190486	0.826557	0.703637	0.970951	0.0204047	0.287639
SP100	-0.289662	0.748517	0.585945	0.956195	0.0204222	0.287647
LPXN	-0.211572	0.809311	0.67676	0.967824	0.0204308	0.287532
RUFY4	-0.112611	0.893498	0.812325	0.982783	0.0204842	0.288046
SERPINF2	-0.136126	0.872733	0.777791	0.979263	0.0205271	0.288411
TUBA4B	-0.133969	0.874617	0.780825	0.979676	0.0206272	0.289578
PAGE5	0.116401	1.12345	1.01796	1.23986	0.0206796	0.290076
SKAP1	-0.102363	0.902702	0.827702	0.984497	0.0207224	0.290436
FMO9P	0.152476	1.16472	1.0235	1.32541	0.020764	0.290781
CACNG8	0.441035	1.55432	1.0695	2.2589	0.0207652	0.29056
BCL9L	0.378255	1.45973	1.05921	2.01172	0.020807	0.290906
TYK2	-0.369025	0.691408	0.50559	0.945519	0.0208464	0.291217
RSPRY1	0.256771	1.29275	1.0397	1.60739	0.0208754	0.291384
GK	-0.236621	0.789291	0.645733	0.964763	0.0208772	0.291171
SKP1	0.355309	1.42662	1.05532	1.92857	0.0208879	0.291082
SART1	-0.222034	0.800888	0.663331	0.966971	0.0209275	0.291397
SNX22	-0.207774	0.812391	0.681024	0.969097	0.0209561	0.291556
SRRM5	-0.258273	0.772384	0.620316	0.961732	0.0209561	0.291319
MAPKAPK3	-0.36314	0.695489	0.510944	0.94669	0.0209891	0.29154
MIIP	-0.245937	0.781972	0.634559	0.96363	0.0210226	0.291768
SH2B2	-0.157311	0.854439	0.747508	0.976665	0.0211054	0.292679
NAA15	0.324935	1.38394	1.04985	1.82434	0.0211618	0.293222
LARP6	-0.18153	0.833993	0.7147	0.973198	0.0211712	0.293115
RBP4	-0.0767976	0.926077	0.86753	0.988575	0.0211773	0.292961
SP5	-0.0866101	0.917035	0.851909	0.987139	0.0212025	0.293073
REC8	-0.115398	0.891012	0.807685	0.982935	0.0212475	0.293456
ALX4	-0.118392	0.888348	0.803214	0.982505	0.0212589	0.293376
UBE2W	0.278502	1.32115	1.04239	1.67445	0.0212592	0.293144
ALKBH4	-0.344799	0.708363	0.528231	0.949921	0.0212709	0.293067
PCDHGB5	0.0885212	1.09256	1.01326	1.17806	0.021296	0.293176
DCLK3	0.184006	1.20202	1.02776	1.40583	0.0212976	0.292962
FOXD1	0.0805033	1.08383	1.01203	1.16073	0.0213406	0.293317
BCLAF1	0.429061	1.53581	1.06561	2.21349	0.0214059	0.293978
CXCR6	-0.110507	0.89538	0.814907	0.9838	0.0214548	0.294413
UBXN2B	0.284458	1.32904	1.04287	1.69374	0.0214912	0.294674
FBXO5	0.213459	1.23795	1.03197	1.48505	0.0215121	0.294724
DSG3	-0.058805	0.942891	0.896774	0.991379	0.0215408	0.29488
MDFIC	-0.217508	0.804521	0.668313	0.96849	0.0215465	0.294722
ERCC6L	0.167442	1.18228	1.02495	1.36375	0.0215472	0.294496
ZBTB48	-0.310728	0.732914	0.562283	0.955323	0.0215628	0.294473
EEF1G	-0.28314	0.753414	0.591743	0.959256	0.0215902	0.294611
KCNE2	0.235638	1.26572	1.03511	1.5477	0.0216624	0.29536
PLIN5	-0.075427	0.927347	0.869517	0.989024	0.021682	0.295392
LIMCH1	0.166716	1.18142	1.02469	1.36212	0.0216858	0.295207
PIK3CA	0.268456	1.30794	1.04003	1.64487	0.0216985	0.295145
CLEC17A	-0.126367	0.881291	0.791153	0.981699	0.0217058	0.295008
CCDC115	-0.387066	0.679046	0.487916	0.945048	0.0217278	0.295072
MGAM	-0.080519	0.922637	0.861285	0.98836	0.0218211	0.296104
PTPDC1	0.329658	1.39049	1.0491	1.84299	0.0218252	0.295924
AGTRAP	-0.262779	0.768911	0.614178	0.962627	0.0218933	0.296612
ZSCAN1	-0.0990353	0.905711	0.832168	0.985753	0.0219018	0.296492
GIGYF1	-0.266443	0.7661	0.609956	0.962214	0.0219524	0.296941
EIF3G	-0.304388	0.737574	0.568486	0.956956	0.0219555	0.296747
ZSWIM3	0.352598	1.42276	1.05214	1.92393	0.0220172	0.297346
CDNF	-0.193854	0.823778	0.697826	0.972464	0.0220339	0.297336
UNC50	0.54237	1.72008	1.08123	2.73639	0.0220405	0.29719
SNX15	-0.374532	0.687611	0.498899	0.947703	0.0221307	0.29817
GPM6A	-0.0918712	0.912223	0.843184	0.986914	0.0221366	0.298014
FKBP11	-0.217099	0.80485	0.6682	0.969447	0.0222064	0.298718
RPSAP9	-0.306633	0.73592	0.565776	0.957232	0.0222664	0.299289
TIMM9	-0.421419	0.656115	0.457135	0.941707	0.02227	0.299102
FMNL1	-0.187104	0.829358	0.706408	0.973707	0.022288	0.299108
SNRNP70	-0.294776	0.744698	0.578343	0.958904	0.0222953	0.298971
OR4A15	0.637024	1.89085	1.09492	3.26535	0.0222964	0.29875
RANGRF	-0.245864	0.782029	0.633352	0.965607	0.0222972	0.298527
SLC27A6	-0.078331	0.924658	0.864573	0.988919	0.0223124	0.298496
SYT1	-0.0667089	0.935468	0.883442	0.990557	0.0223158	0.298307
GPT	-0.0879038	0.915849	0.849328	0.98758	0.0223242	0.298186
ZNF80	-0.133622	0.874921	0.780076	0.981298	0.0224626	0.2998
CORO1A	-0.14942	0.861207	0.757502	0.979111	0.0224641	0.299586
ACOT1	-0.198128	0.820265	0.691924	0.972411	0.0224758	0.299508
FAM131A	-0.286588	0.750821	0.58701	0.960346	0.0224792	0.299319
PKHD1L1	-0.117305	0.889314	0.804085	0.983577	0.0224826	0.29913
CIR1	-0.449006	0.638262	0.434026	0.938604	0.02249	0.298996
EPHA5	0.187378	1.20608	1.02678	1.41669	0.022499	0.298883
PDCD2	0.370473	1.44842	1.05348	1.99142	0.0225675	0.29956
FCRL2	-0.104753	0.900547	0.822998	0.985403	0.0226068	0.299847
SFRP5	-0.141977	0.867641	0.767908	0.980327	0.0226743	0.30051
TMEM200C	-0.120302	0.886653	0.799495	0.983312	0.0226831	0.300392
GIMAP2	-0.160057	0.852095	0.742401	0.977998	0.0228231	0.302012
MGAT3	-0.128642	0.879288	0.787056	0.98233	0.0228885	0.302642
STEAP1	-0.143374	0.86643	0.765721	0.980384	0.0229541	0.303275
ZNF853	-0.158261	0.853627	0.744769	0.978397	0.0229814	0.303401
TNFSF12	-0.241033	0.785816	0.638364	0.967328	0.0230109	0.303555
ANKRD36	-0.211554	0.809325	0.674332	0.971342	0.0230698	0.304098
CHRNE	-0.177	0.83778	0.719125	0.976013	0.023113	0.304431
TMC8	-0.144912	0.865098	0.763419	0.980319	0.0231143	0.304213
RPS7	-0.266607	0.765974	0.608523	0.964163	0.0231589	0.304566
ZMYND10	-0.080737	0.922436	0.860339	0.989016	0.0231726	0.30451
RFXANK	-0.277203	0.757901	0.596604	0.962805	0.023182	0.304399
MT3	-0.174225	0.840108	0.722792	0.976466	0.0231891	0.304258
QRSL1	0.249212	1.28301	1.03461	1.59106	0.0232161	0.304379
RPL23	-0.239741	0.786831	0.639592	0.967966	0.0233311	0.305652
ZBED2	-0.0974364	0.90716	0.833894	0.986864	0.0233461	0.305614
CPNE3	0.241575	1.27325	1.03329	1.56894	0.0233689	0.305677
CCDC69	-0.14438	0.865559	0.763996	0.980622	0.0233755	0.305529
ANKDD1A	-0.236919	0.789055	0.642861	0.968495	0.0234412	0.306154
SIM2	0.0964377	1.10124	1.01311	1.19704	0.0234535	0.30608
EPHA3	0.107873	1.11391	1.01466	1.22286	0.0234721	0.306089
CERKL	-0.181181	0.834284	0.713239	0.975872	0.0234917	0.30611
PSMB9	-0.144617	0.865353	0.763572	0.980701	0.0235001	0.305985
GPR27	-0.128618	0.87931	0.78669	0.982834	0.0235208	0.306021
NLN	0.247822	1.28123	1.03392	1.58769	0.0235217	0.3058
ASGR2	-0.167402	0.84586	0.731776	0.977729	0.0235334	0.305719
ICMT	0.469276	1.59884	1.06506	2.40013	0.0235716	0.305982
LCP1	-0.155355	0.856111	0.748347	0.979394	0.0236176	0.306347
OR2B11	-0.886831	0.411959	0.191116	0.887999	0.0236303	0.306278
NLRC3	-0.187216	0.829265	0.705134	0.975248	0.0236413	0.306189
ACSM4	0.575283	1.77763	1.08006	2.92576	0.0236422	0.305967
GSPT2	-0.130168	0.877948	0.784337	0.982731	0.023649	0.305824
KLHL29	-0.142989	0.866764	0.765777	0.981068	0.023674	0.305915
PASK	-0.260608	0.770583	0.614838	0.96578	0.023684	0.305812
NOS2	0.161756	1.17557	1.02178	1.35252	0.0237546	0.306492
COPG2	-0.307672	0.735157	0.563051	0.959869	0.0237621	0.306357
OR6B3	-0.363557	0.695199	0.507262	0.952765	0.0237675	0.306195
C4BPA	-0.097023	0.907535	0.834313	0.987183	0.0237894	0.306246
G6PD	0.212706	1.23702	1.02868	1.48756	0.023795	0.306087
STK39	-0.175455	0.839075	0.720606	0.97702	0.0238626	0.306726
PTPMT1	-0.357431	0.699471	0.512982	0.953756	0.0238689	0.306575
B4GALNT4	-0.134484	0.874167	0.777891	0.982358	0.023887	0.306576
ZBED1	-0.356268	0.700285	0.514012	0.954062	0.0239443	0.307082
TIFAB	-0.110856	0.895068	0.812933	0.985502	0.0239859	0.307384
B9D1	-0.204852	0.814768	0.681996	0.973389	0.023999	0.307321
MIOS	0.372444	1.45128	1.05022	2.00549	0.0240165	0.307314
SRD5A3	0.221707	1.24821	1.02953	1.51332	0.0240606	0.307647
CISH	-0.152062	0.858935	0.752634	0.98025	0.024077	0.307626
ZNF204P	-0.118007	0.88869	0.802089	0.984641	0.0240802	0.307437
USP26	0.193965	1.21405	1.02572	1.43696	0.024116	0.307664
BCL2	-0.120112	0.886821	0.79891	0.984405	0.0241297	0.307608
C7orf57	-0.156249	0.855347	0.74672	0.979775	0.0241442	0.307564
PLXND1	0.263986	1.30211	1.03507	1.63804	0.0241768	0.307749
PDZK1P1	-0.108778	0.896929	0.815987	0.9859	0.0241813	0.307577
RPL13A	-0.243566	0.783828	0.634216	0.968733	0.0242008	0.307595
GPR137B	0.227616	1.2556	1.03013	1.53043	0.0242041	0.307408
SLAMF7	-0.108057	0.897576	0.817071	0.986014	0.0242128	0.307291
STRAP	0.338756	1.4032	1.04512	1.88396	0.0242236	0.307199
CDC23	0.444953	1.56042	1.05967	2.29779	0.0242277	0.307023
JUN	-0.175768	0.838813	0.719888	0.977384	0.0242459	0.307024
RASGRP1	-0.107826	0.897784	0.817382	0.986095	0.0242915	0.307374
PPIB	-0.290555	0.747848	0.5807	0.963109	0.0243731	0.308177
ERP27	-0.10078	0.904132	0.828157	0.987077	0.0244218	0.308565
PARG	0.351756	1.42156	1.04639	1.93125	0.0244485	0.308673
GEMIN8P4	-0.216568	0.805278	0.666821	0.972483	0.0244594	0.308583
ANAPC11	-0.243888	0.783575	0.633577	0.969085	0.0244726	0.308521
C11orf49	-0.28648	0.750902	0.58503	0.963803	0.0244836	0.308432
PIK3CD	-0.162769	0.849788	0.737401	0.979303	0.0245172	0.308627
ADAM29	-0.140498	0.868926	0.768767	0.982134	0.0245459	0.308761
MMP25	-0.118024	0.888675	0.80179	0.984975	0.0245531	0.308624
GMIP	-0.281297	0.754804	0.590656	0.96457	0.0245582	0.308461
ABO	-0.109161	0.896586	0.815191	0.986108	0.024572	0.308406
TGIF1	-0.314355	0.73026	0.555184	0.960545	0.0245888	0.30839
A4GALT	-0.16359	0.84909	0.736215	0.979271	0.0245905	0.308185
LTF	-0.0516352	0.949675	0.907862	0.993414	0.0246036	0.308123
CAPN6	-0.0644413	0.937591	0.886349	0.991795	0.0246228	0.308138
ZNF575	-0.287808	0.749906	0.583435	0.963876	0.0246243	0.30793
C2CD2	0.233174	1.2626	1.03022	1.54741	0.0246529	0.308061
SAMD3	-0.109278	0.896481	0.814943	0.986177	0.0247003	0.308428
TMEM98	-0.142258	0.867398	0.766096	0.982095	0.0247613	0.308963
C7orf33	0.245592	1.27838	1.03165	1.58411	0.0247801	0.308973
AKAP8L	-0.290368	0.747988	0.580478	0.963837	0.0247872	0.308835
TMEM69	-0.369324	0.691202	0.500667	0.954247	0.0247942	0.308697
PCDHGA3	0.139154	1.1493	1.0178	1.2978	0.0248019	0.308567
FBXO27	-0.127328	0.880445	0.787764	0.98403	0.0248553	0.309007
ZNF222	-0.253483	0.776093	0.6219	0.968516	0.0248941	0.309263
CHST9	-0.0801189	0.923007	0.86058	0.989961	0.024939	0.309596
HLA-DMA	-0.17557	0.838979	0.719605	0.978156	0.024961	0.309644
CCL22	-0.11799	0.888705	0.801603	0.985271	0.0249676	0.309501
DZIP1L	-0.174975	0.839478	0.720383	0.978263	0.0249936	0.309598
GTF2IRD2B	-0.206227	0.813649	0.679372	0.974465	0.0250226	0.309732
GYPC	-0.177838	0.837078	0.716471	0.977987	0.0250664	0.31005
SFTPA1	-0.358439	0.698766	0.510575	0.956322	0.0251603	0.310985
HLA-DRB1	-0.135605	0.873187	0.775444	0.983251	0.0251667	0.310839
FIS1	-0.303802	0.738007	0.565645	0.962892	0.0251819	0.310802
RTN1	-0.101904	0.903116	0.826021	0.987406	0.0251979	0.310774
DMRTC1B	-0.106887	0.898627	0.818323	0.986812	0.0252258	0.310894
CCL25	-0.19805	0.820329	0.689669	0.975743	0.025262	0.311115
OR56A3	0.13246	1.14163	1.01654	1.28212	0.0252857	0.311182
GLUL	-0.183493	0.832358	0.708668	0.977637	0.025384	0.312167
ZNF485	0.2504	1.28454	1.03129	1.59998	0.0254209	0.312395
CDK19	0.212697	1.23701	1.02645	1.49076	0.0254715	0.312791
SYN2	-0.093967	0.910313	0.838276	0.98854	0.0254837	0.312716
MED18	0.402052	1.49489	1.05051	2.12725	0.0255009	0.312702
TCTN2	-0.237222	0.788816	0.640573	0.971365	0.0255159	0.312661
NR0B1	-0.15179	0.859169	0.751941	0.981688	0.0256358	0.313905
NDRG1	0.136387	1.14613	1.01674	1.29197	0.0256379	0.313706
ASAH2	0.16072	1.17436	1.01975	1.3524	0.0256438	0.313552
NT5DC3	-0.263448	0.768397	0.609671	0.968449	0.0256464	0.31336
VBP1	0.374584	1.45439	1.04653	2.02119	0.0256928	0.313702
BTN3A1	-0.216334	0.805466	0.666037	0.974083	0.0256991	0.313555
TAS2R19	-0.245017	0.782691	0.631095	0.970703	0.0257024	0.313371
CYP3A7	0.261504	1.29888	1.03222	1.63443	0.0257158	0.313311
TAF2	0.228973	1.25731	1.02811	1.5376	0.0257494	0.313495
EIF4EBP1	0.149621	1.16139	1.01819	1.32474	0.0258554	0.314561
SLC1A1	-0.0738752	0.928788	0.870354	0.991144	0.0258632	0.314433
C2orf15	-0.211143	0.809658	0.672383	0.97496	0.0259143	0.314829
TCTE1	-0.178613	0.83643	0.714775	0.97879	0.025927	0.314759
RDH5	-0.126156	0.881477	0.788845	0.984986	0.0259468	0.314776
CD163L1	0.111878	1.11838	1.0135	1.23411	0.025958	0.314688
ZNF326	-0.37167	0.689582	0.497177	0.956446	0.0259633	0.314528
MEF2B	-0.125168	0.882349	0.790274	0.985152	0.0260139	0.314918
VWA3A	-0.112188	0.893877	0.809797	0.986686	0.0260208	0.314777
PLA2G10	-0.0914254	0.912629	0.842039	0.989138	0.0260228	0.314579
CCDC9	-0.224795	0.79868	0.65525	0.973506	0.0260249	0.314381
ANKRD46	0.245994	1.27889	1.02981	1.58822	0.0260313	0.314236
ULBP1	0.0985574	1.10358	1.01183	1.20364	0.0260385	0.314101
GSN	-0.209949	0.810626	0.673755	0.975301	0.0260807	0.314388
NENF	-0.237984	0.788216	0.63913	0.972077	0.026101	0.31441
DCD	0.0521379	1.05352	1.00621	1.10306	0.0261487	0.314763
PAK6	0.143547	1.15436	1.01719	1.31004	0.0261508	0.314566
SRP54	0.344217	1.41089	1.04156	1.91117	0.0262196	0.315171
ORAI2	-0.275288	0.759353	0.595681	0.967996	0.0262444	0.315246
RAB13	-0.295383	0.744246	0.57354	0.965761	0.0262802	0.315455
PGRMC2	0.303439	1.35451	1.03639	1.77027	0.026305	0.31553
SMAD5	0.324758	1.3837	1.03898	1.84279	0.0263165	0.315447
TBL1X	0.245433	1.27818	1.02917	1.58742	0.0264148	0.316402
SLC1A4	-0.174073	0.840236	0.720535	0.979822	0.0264236	0.316286
IFI35	-0.17013	0.843555	0.72589	0.980293	0.0264428	0.316294
SYF2	-0.423912	0.654481	0.4501	0.951669	0.0264656	0.316344
AMY2A	-0.178781	0.836289	0.714126	0.97935	0.0264908	0.316424
TRIM42	1.08356	2.95519	1.13462	7.69698	0.0265172	0.316518
RBP1	-0.10069	0.904213	0.827236	0.988353	0.0265532	0.316725
CXCL5	-0.0953946	0.909014	0.835502	0.988995	0.026612	0.317205
CROCC	-0.17225	0.841769	0.722834	0.980272	0.0266683	0.317655
ZNF525	0.261959	1.29947	1.03061	1.63847	0.0267656	0.318592
NME5	-0.0789581	0.924079	0.861706	0.990966	0.0267955	0.318724
CCDC34	-0.23193	0.793001	0.645813	0.973736	0.0268264	0.31887
HSCB	-0.29691	0.743111	0.571344	0.966517	0.0268355	0.318756
FAM71E2	-0.135673	0.873128	0.774307	0.984561	0.026839	0.318576
CCDC12	-0.245582	0.782249	0.629358	0.972283	0.026878	0.318816
AMPH	-0.0979232	0.906719	0.831365	0.988902	0.0269614	0.319583
SEMA3G	-0.132974	0.875487	0.778167	0.984979	0.0269873	0.319668
VPREB3	-0.10787	0.897744	0.815894	0.987806	0.0270009	0.319608
EN2	0.0852702	1.08901	1.00974	1.17451	0.0270227	0.319644
CDRT4	-0.248822	0.779719	0.625364	0.972173	0.0270561	0.319818
CTRC	-0.436765	0.646124	0.4386	0.951838	0.0271266	0.320428
HMGB3	0.154521	1.1671	1.01761	1.33855	0.0271358	0.320315
INO80B	-0.182704	0.833015	0.708347	0.979624	0.0271854	0.320679
NCOA2	0.141258	1.15172	1.016	1.30557	0.0272385	0.321083
CHMP2B	0.352369	1.42243	1.04039	1.94477	0.0272387	0.320863
PHF1	-0.315942	0.729101	0.550783	0.965151	0.0272554	0.320839
AKNAD1	0.179723	1.19689	1.02032	1.404	0.0273115	0.321277
GBP4	-0.115327	0.891075	0.80433	0.987175	0.0273155	0.321103
ADORA1	-0.106959	0.898562	0.817135	0.988104	0.027322	0.320959
C6orf47	-0.305707	0.736602	0.561459	0.966381	0.0273261	0.320785
ITPK1	-0.246769	0.781321	0.627536	0.972793	0.0273402	0.320731
INE2	-0.0982433	0.906428	0.83066	0.989108	0.0273928	0.321126
GGT7	-0.1745	0.839877	0.719223	0.980772	0.0274304	0.321347
RPL23P8	-0.185669	0.830548	0.704167	0.979611	0.0274856	0.321772
OR51E2	0.145358	1.15645	1.01621	1.31606	0.0275467	0.322266
FXYD2	-0.156053	0.855514	0.744635	0.982903	0.0275626	0.322232
PTCD2	0.325548	1.38479	1.0366	1.84994	0.027578	0.32219
DHX40P1	0.149574	1.16134	1.01658	1.32671	0.0276572	0.322894
AHI1	0.257099	1.29317	1.02859	1.62581	0.027711	0.323301
JAK3	-0.131798	0.876518	0.779464	0.985658	0.0277192	0.323176
ITIH1	-0.243428	0.783936	0.631141	0.973722	0.0277567	0.323392
HSD17B8	-0.153748	0.857488	0.747747	0.983335	0.0277721	0.323351
ALDH1A1	-0.123882	0.883484	0.791179	0.986559	0.0277845	0.323275
CCDC106	-0.174925	0.83952	0.718383	0.981084	0.0277947	0.323173
CLDN18	-0.229639	0.79482	0.647706	0.975349	0.0278795	0.323938
TTC19	0.328072	1.38829	1.03629	1.85986	0.0278882	0.323818
IQCC	-0.276731	0.758259	0.592442	0.970485	0.0279554	0.324378
CDK8	0.213052	1.23745	1.02333	1.49637	0.0279582	0.32419
RORB	0.107081	1.11302	1.01166	1.22455	0.0279617	0.32401
PHGR1	-0.0811916	0.922017	0.857615	0.991255	0.0279688	0.323872
JPH1	0.116175	1.12319	1.01264	1.24581	0.027976	0.323735
LARP4	0.29754	1.34654	1.03259	1.75595	0.0280387	0.324241
MIER1	-0.328892	0.719721	0.536685	0.965182	0.0280448	0.324092
OSBPL10	0.234568	1.26436	1.02556	1.55877	0.0280704	0.324169
IGFBP4	-0.146941	0.863345	0.757181	0.984393	0.0281687	0.325084
GLRA3	-0.0707342	0.93171	0.874671	0.992467	0.0281954	0.325171
CALY	-0.201318	0.817653	0.683097	0.978713	0.0281982	0.324985
TBR1	-0.259072	0.771768	0.612348	0.972691	0.0281989	0.324773
IKZF1	-0.131635	0.876661	0.779421	0.986031	0.0282014	0.324583
CCR9	-0.249632	0.779087	0.623378	0.973691	0.028212	0.324485
C1QTNF4	-0.131207	0.877036	0.780045	0.986087	0.0282152	0.324304
CLIP3	-0.202557	0.81664	0.681407	0.978711	0.0283124	0.325202
TSHR	-0.147397	0.862952	0.756418	0.984489	0.0283443	0.325349
TF	-0.0688288	0.933486	0.877776	0.992732	0.0283584	0.325292
F11R	0.316104	1.37177	1.03403	1.81983	0.028378	0.325298
TSPAN10	-0.112849	0.893285	0.807541	0.988134	0.0283926	0.325246
TM4SF4	0.132071	1.14119	1.01405	1.28427	0.0284206	0.325349
PCDHGB3	0.127765	1.13629	1.01358	1.27384	0.0284246	0.325177
HPS4	-0.384478	0.680806	0.482688	0.96024	0.0284382	0.325115
ARRDC5	-0.175399	0.839122	0.717254	0.981697	0.0284746	0.325313
PPP3CC	-0.273183	0.760954	0.595933	0.97167	0.0284959	0.325337
HHIPL2	0.0718584	1.0745	1.00759	1.14586	0.0285019	0.325189
GNA11	0.263847	1.30193	1.02799	1.64886	0.0285952	0.326035
HOTAIR	0.065889	1.06811	1.00692	1.13302	0.0285982	0.325851
ACER1	0.145438	1.15655	1.01532	1.31742	0.0286132	0.325805
ABCB1	-0.105305	0.90005	0.819055	0.989054	0.0286165	0.325625
PZP	-0.210739	0.809986	0.670645	0.978278	0.0286714	0.326032
BLVRA	-0.195376	0.822525	0.690446	0.979871	0.0286951	0.326085
TNFRSF6B	-0.144245	0.865675	0.76072	0.985111	0.0287098	0.326034
CD3G	-0.0920527	0.912057	0.839848	0.990475	0.0287142	0.325867
FADS3	-0.217298	0.80469	0.662311	0.977678	0.028729	0.325818
PRF1	-0.106956	0.898565	0.81644	0.988952	0.0287327	0.325644
POLR1D	-0.405254	0.666807	0.463715	0.958848	0.0287633	0.325774
DHX58	-0.190715	0.826368	0.696524	0.980418	0.0287636	0.325562
APOH	0.211563	1.23561	1.02217	1.49361	0.0287714	0.325434
KDM6A	0.269585	1.30942	1.02832	1.66735	0.0287789	0.325303
IRS2	-0.14127	0.868255	0.764962	0.985495	0.0288114	0.325455
CDK11A	-0.200696	0.818161	0.683414	0.979476	0.0288286	0.325433
NKX2-2	0.0686769	1.07109	1.00708	1.13917	0.0289294	0.326355
RAD50	0.270564	1.3107	1.02819	1.67084	0.0289298	0.326144
SPRY2	-0.154237	0.857069	0.746273	0.984315	0.0289764	0.326453
MKRN1	-0.465969	0.627527	0.413044	0.953386	0.0289867	0.326353
ACOT4	-0.134298	0.874329	0.775038	0.986341	0.0289932	0.326212
SCRN1	0.160401	1.17398	1.01655	1.3558	0.0290082	0.326166
LRRC61	-0.201864	0.817206	0.681753	0.979573	0.0290228	0.326115
C11orf1	-0.214579	0.806881	0.665461	0.978355	0.0290694	0.326423
WDR49	-0.172767	0.841334	0.720414	0.98255	0.0290851	0.326384
HPGD	-0.0785069	0.924496	0.861551	0.992039	0.0290998	0.326334
TP53I3	-0.21643	0.805389	0.663016	0.978335	0.0292093	0.327347
TMEM233	0.185665	1.20402	1.01894	1.42272	0.0292368	0.32744
ZFAND1	0.274526	1.31591	1.02811	1.68426	0.0292472	0.327342
ITM2C	-0.147504	0.862859	0.755685	0.985233	0.0292704	0.327387
FITM1	-0.175062	0.839405	0.717143	0.98251	0.0292834	0.327318
CNPY3	-0.296411	0.743482	0.569517	0.970585	0.0292949	0.327232
C17orf107	-0.140571	0.868862	0.76566	0.985975	0.0293395	0.327516
PRKCQ	-0.0992827	0.905487	0.828121	0.99008	0.0293504	0.327423
TAT	-0.0523806	0.948968	0.905287	0.994756	0.0293562	0.327274
CADM3	-0.0802453	0.92289	0.858614	0.991978	0.0293579	0.327079
ZBTB32	-0.149213	0.861385	0.753169	0.98515	0.0293771	0.327079
SECISBP2L	0.240319	1.27166	1.02436	1.57866	0.0294021	0.327144
GREB1	-0.074689	0.928032	0.867704	0.992555	0.0294151	0.327076
OMA1	-0.329912	0.718987	0.534201	0.967692	0.0295077	0.327891
APOA2	0.206399	1.22924	1.02074	1.48033	0.0295199	0.327813
FFAR2	0.0961299	1.1009	1.00959	1.20047	0.0295456	0.327885
DDB2	-0.274122	0.760239	0.593896	0.973173	0.0295698	0.32794
CD83	-0.187284	0.829208	0.700471	0.981605	0.029582	0.327863
SETD7	0.256459	1.29235	1.02574	1.62825	0.0295902	0.32774
NPC2	-0.224866	0.798624	0.652152	0.977992	0.0296121	0.327771
RPS4X	-0.253276	0.776254	0.617864	0.975246	0.0296123	0.32756
SMARCA5	0.331556	1.39313	1.03332	1.87824	0.0296318	0.327563
ZNF473	0.317242	1.37333	1.03175	1.82801	0.0296936	0.328033
KLRG1	-0.154059	0.857222	0.746036	0.984978	0.0297425	0.328361
DNAJC30	-0.324189	0.723113	0.539814	0.968655	0.0297443	0.328168
GALNTL5	0.485938	1.6257	1.04883	2.51985	0.0297659	0.328194
REM2	-0.138454	0.870703	0.768484	0.986518	0.0297802	0.328141
DIP2C	0.301521	1.35191	1.02992	1.77458	0.0298285	0.32846
SNCAIP	-0.110045	0.895794	0.811111	0.989318	0.0298617	0.328614
RP1	-0.0819736	0.921296	0.8556	0.992037	0.0298735	0.328532
MYO15A	-0.155167	0.856272	0.744363	0.985006	0.029903	0.328644
TAF1L	0.193702	1.21373	1.01898	1.44571	0.0299531	0.328982
RPL10	-0.29548	0.744174	0.569895	0.971751	0.0299721	0.328979
KCNRG	-0.204713	0.814882	0.677345	0.980345	0.0299747	0.328796
HOXC13	0.0833049	1.08687	1.00807	1.17183	0.0300519	0.329432
TRAPPC10	0.351114	1.42065	1.03445	1.95104	0.0300676	0.329392
DNASE1L3	-0.0932947	0.910925	0.837253	0.99108	0.0301429	0.330005
DCDC2B	-0.287235	0.750336	0.578739	0.97281	0.0301561	0.329937
APOL4	-0.109378	0.896392	0.811996	0.989559	0.0301582	0.329749
KRTAP5-9	-0.164232	0.848545	0.731429	0.984413	0.0302141	0.330149
SAMD10	-0.232629	0.792448	0.642093	0.97801	0.0302269	0.330077
SNX18	0.315848	1.37142	1.03064	1.82488	0.0302332	0.329934
LYZL2	0.132299	1.14145	1.01271	1.28656	0.030255	0.329962
PAQR8	-0.20018	0.818583	0.682965	0.981132	0.0303048	0.330293
KIF17	-0.173441	0.840767	0.718649	0.983636	0.0303098	0.330137
CYP1B1	-0.122604	0.884614	0.791722	0.988405	0.0303113	0.329943
HLA-DPB1	-0.144846	0.865155	0.758875	0.986321	0.0303168	0.329791
ZSCAN12P1	0.163322	1.17742	1.01564	1.36495	0.0303254	0.329675
CBX5	0.292765	1.34013	1.02804	1.74696	0.0304323	0.330627
NCR1	-0.221216	0.801543	0.656028	0.979335	0.0304446	0.33055
PCDHA9	0.126879	1.13528	1.01201	1.27357	0.0305024	0.330966
TMEM184C	0.347693	1.4158	1.03313	1.94019	0.030562	0.331402
FUT7	-0.117775	0.888896	0.798898	0.989032	0.0305833	0.331422
RAB34	-0.173695	0.840553	0.718113	0.98387	0.0305869	0.331251
ETF1	0.438884	1.55098	1.0419	2.30878	0.030604	0.331226
CRYZ	-0.218054	0.804082	0.659867	0.979816	0.030607	0.331048
AMBRA1	-0.456516	0.633487	0.418769	0.958298	0.0306442	0.331241
IQSEC1	0.332772	1.39483	1.03153	1.88609	0.0306494	0.331087
SYT2	-0.178373	0.83663	0.711664	0.98354	0.0306924	0.331342
KCTD15	0.202309	1.22423	1.01896	1.47084	0.0307304	0.331542
POU5F1	-0.150944	0.859896	0.749845	0.986099	0.0307483	0.331526
LAMC2	-0.0833723	0.920009	0.852984	0.992299	0.0307516	0.331352
BBOX1	-0.0628546	0.93908	0.887024	0.994191	0.0307565	0.331196
OR8J3	3.38206	29.4314	1.36797	633.204	0.0307662	0.331091
UBR5	0.252573	1.28733	1.02365	1.61894	0.0307851	0.331086
AATK	-0.140185	0.869197	0.765363	0.987118	0.0307946	0.330979
LCK	-0.0938917	0.910381	0.836014	0.991364	0.0308159	0.330999
PPP1R14D	0.125606	1.13383	1.01164	1.27079	0.0308589	0.331252
FAM172A	0.292776	1.34014	1.02722	1.7484	0.0309375	0.331887
DSG2	-0.171596	0.84232	0.720752	0.984392	0.0309455	0.331764
SCARNA17	-0.183481	0.832368	0.704543	0.983383	0.0310092	0.332238
HS3ST4	-0.098812	0.905913	0.828092	0.991048	0.0310683	0.332663
JPH3	0.0988028	1.10385	1.00902	1.20758	0.0310839	0.332621
NME2	-0.246488	0.78154	0.624642	0.977849	0.031093	0.33251
CDC20B	-0.0626075	0.939312	0.887339	0.99433	0.0311015	0.332392
PPP1R15A	-0.22296	0.800147	0.653313	0.979981	0.0311262	0.332448
MOV10	-0.3175	0.727967	0.545409	0.971629	0.0311351	0.332335
HBBP1	-1.43255	0.238699	0.064867	0.878368	0.0311569	0.33236
ECEL1	-0.0904032	0.913563	0.841454	0.991851	0.0311612	0.332198
MRGPRG	5.59056	267.885	1.65715	43304.5	0.0311906	0.332303
CXCR5	-0.0967767	0.907759	0.831257	0.991301	0.0312025	0.332223
RARRES1	-0.0854916	0.918061	0.849361	0.992318	0.0312172	0.332173
SPN	-0.126761	0.880944	0.784947	0.988682	0.0312941	0.332783
NUAK2	-0.180431	0.83491	0.70845	0.983944	0.0313097	0.332741
PIGF	0.366011	1.44197	1.03324	2.01239	0.0313785	0.333265
RPS15A	-0.288927	0.749067	0.575763	0.974536	0.0313902	0.333182
LRIT2	-0.396725	0.672519	0.468581	0.965216	0.0313966	0.333042
ZNF683	-0.092604	0.911554	0.837809	0.991791	0.0314393	0.333288
DMD	-0.11141	0.894572	0.80823	0.990137	0.0314477	0.333169
PHKA1	0.235085	1.26502	1.02113	1.56715	0.0314502	0.33299
SCUBE2	-0.0561082	0.945437	0.898299	0.995048	0.0315401	0.333734
CCL23	-0.148976	0.86159	0.752159	0.986942	0.0315847	0.333999
ANKS4B	0.188135	1.207	1.01672	1.43289	0.0316063	0.334021
OR52K1	1.07286	2.92372	1.09899	7.77822	0.0316318	0.334083
LIN28A	0.0711588	1.07375	1.00627	1.14575	0.0316475	0.334042
HLA-DQA1	-0.111779	0.894242	0.80755	0.990241	0.0316772	0.334148
TMEM160	-0.175142	0.839338	0.715389	0.984763	0.0316898	0.334075
PRMT6	-0.243901	0.783565	0.62724	0.978851	0.0316947	0.33392
CDH19	-0.0890701	0.914781	0.843383	0.992224	0.0316953	0.333721
SLC38A2	0.293791	1.3415	1.02606	1.75392	0.0317065	0.333632
RPS3A	-0.29464	0.7448	0.569198	0.974576	0.0317392	0.33377
KRCC1	-0.284858	0.752121	0.579947	0.97541	0.0317396	0.333569
SERAC1	0.280719	1.32408	1.02481	1.71074	0.0317571	0.333547
BCL7B	-0.445601	0.640439	0.426427	0.961858	0.0317639	0.333413
NME6	0.403713	1.49737	1.03583	2.16457	0.0317763	0.333339
CPO	0.1569	1.16988	1.01377	1.35003	0.0317848	0.333223
RPL24	-0.272746	0.761286	0.593477	0.976545	0.031811	0.333293
PRKD2	-0.341435	0.71075	0.520374	0.970774	0.0318386	0.333377
MTM1	0.307786	1.36041	1.02698	1.80209	0.0319079	0.333897
PLCL1	-0.112735	0.893387	0.805947	0.990314	0.0319385	0.334013
TAP1	-0.152093	0.858908	0.747455	0.98698	0.0319714	0.334152
ZNF276	-0.230902	0.793818	0.642793	0.980326	0.0319919	0.334162
TBPL1	0.302576	1.35334	1.02636	1.78449	0.0320024	0.334066
CASD1	-0.17663	0.838089	0.713097	0.984991	0.0320737	0.334607
KIAA0040	-0.149902	0.860792	0.75053	0.987254	0.0320818	0.334486
TSNAXIP1	-0.137738	0.871327	0.768194	0.988307	0.0321167	0.334646
SPRR4	0.236021	1.2662	1.0203	1.57137	0.0321642	0.334936
SDHA	0.333461	1.39579	1.0287	1.89387	0.0322159	0.335269
TAF10	-0.278531	0.756895	0.586576	0.976668	0.0322357	0.335271
SGCE	-0.123586	0.883745	0.789227	0.989583	0.0322412	0.335124
TFF1	-0.0376855	0.963016	0.930358	0.99682	0.0322814	0.335337
NEDD9	-0.162879	0.849694	0.731963	0.986361	0.0323196	0.335529
IRF4	-0.0864641	0.917168	0.847334	0.992759	0.0323692	0.33584
GABRP	-0.0456422	0.955384	0.916265	0.996172	0.0323751	0.335698
CNDP1	-0.178155	0.836812	0.710809	0.985152	0.0323856	0.335602
HHLA3	-0.205377	0.81434	0.674667	0.98293	0.0324106	0.335657
FBXW11	0.323922	1.38254	1.02743	1.86038	0.0324642	0.336009
OGFRL1	-0.17505	0.839415	0.714977	0.985512	0.0324978	0.336152
NFKBIZ	-0.110825	0.895095	0.808632	0.990803	0.0324983	0.335954
IGSF10	-0.0949465	0.909422	0.833606	0.992133	0.0325326	0.336105
ZNF562	0.286677	1.33199	1.02413	1.73241	0.0325378	0.335955
POM121L9P	-0.134679	0.873996	0.772467	0.988869	0.0325478	0.335854
NR3C2	-0.13006	0.878042	0.779332	0.989256	0.0325573	0.33575
IFI27L2	-0.164205	0.848568	0.729934	0.986484	0.0325927	0.335912
TRMT12	0.253118	1.28803	1.02111	1.62474	0.0326568	0.336369
DLGAP1	-0.0730016	0.929599	0.869355	0.994018	0.0327218	0.336835
IRF7	-0.153295	0.857876	0.745274	0.987492	0.032737	0.336788
DYDC2	-0.0943403	0.909973	0.834466	0.992312	0.032795	0.337182
VWA5B2	0.0885901	1.09263	1.00727	1.18523	0.0328081	0.337113
SLC17A5	0.269462	1.30926	1.02224	1.67686	0.0328265	0.337099
HLA-G	-0.104252	0.900998	0.818731	0.991531	0.0328379	0.337014
TCF7L2	-0.18168	0.833868	0.705698	0.985318	0.0328693	0.337133
CD244	-0.130972	0.877242	0.777769	0.989437	0.0329333	0.337586
MICB	-0.142333	0.867332	0.760993	0.988531	0.0329394	0.337446
USP9X	0.298178	1.3474	1.02446	1.77215	0.032941	0.33726
B3GALT4	-0.194258	0.823446	0.68879	0.984426	0.0329855	0.337513
ALDH1A2	-0.100016	0.904823	0.825339	0.991962	0.0330072	0.337532
OFD1	-0.324486	0.722899	0.536423	0.9742	0.0330331	0.337595
SRGN	-0.154591	0.856766	0.743222	0.987656	0.0330727	0.337797
CENPI	0.118885	1.12624	1.00956	1.25641	0.0331346	0.338227
PARVG	-0.157789	0.85403	0.738632	0.987456	0.0331388	0.338068
RIC3	-0.0804467	0.922704	0.856846	0.993625	0.0332339	0.338835
CCL17	-0.103457	0.901714	0.81978	0.991838	0.0332892	0.339196
SERPING1	-0.166868	0.846311	0.725765	0.986879	0.0333012	0.339115
XIAP	0.355382	1.42673	1.02848	1.97919	0.0333292	0.339198
BTBD17	0.232228	1.26141	1.0185	1.56224	0.0333405	0.339111
XPNPEP3	0.287431	1.333	1.02295	1.73702	0.0333412	0.338916
TNFAIP2	-0.163554	0.849121	0.730359	0.987194	0.0333676	0.338982
HCN2	0.0967873	1.10163	1.00765	1.20437	0.033384	0.338947
YWHAZ	0.236299	1.26655	1.01877	1.57461	0.0333908	0.338814
MPST	-0.196732	0.821411	0.685239	0.984643	0.0333945	0.33865
VAPB	0.288177	1.33399	1.02291	1.73967	0.033404	0.338546
SQLE	0.157934	1.17109	1.01247	1.35455	0.0334286	0.338594
ALG3	0.258339	1.29478	1.0204	1.64293	0.0334893	0.339007
ARL4D	-0.147664	0.862721	0.752914	0.988543	0.0335147	0.339063
AGPAT1	0.424186	1.52835	1.03348	2.26017	0.0335912	0.339635
TRIM67	0.0845512	1.08823	1.00658	1.1765	0.0336004	0.339527
ODF3B	-0.149968	0.860735	0.74953	0.988439	0.0336107	0.33943
FCRL1	-0.0965251	0.907987	0.830629	0.99255	0.0336229	0.339352
RPF1	-0.407727	0.665161	0.456585	0.969018	0.0336778	0.339706
IGFBPL1	-0.114725	0.891611	0.802026	0.991203	0.0337102	0.339831
ITGB7	-0.120897	0.886125	0.792561	0.990735	0.0337156	0.339686
ZHX1	0.233233	1.26268	1.01807	1.56605	0.0337578	0.339909
LMBRD2	0.157625	1.17073	1.01212	1.35418	0.0338208	0.340343
PGLYRP2	-0.0571645	0.944439	0.895851	0.995661	0.033895	0.340888
FKBP2	-0.151415	0.859491	0.747275	0.988559	0.033908	0.340818
SAA2	-0.0655217	0.936579	0.881551	0.995042	0.0339341	0.34088
ESRP1	0.241186	1.27276	1.01846	1.59055	0.0339373	0.340711
RAMP3	-0.117357	0.889268	0.797851	0.991159	0.033971	0.340849
WTIP	-0.156653	0.855	0.739734	0.988228	0.0339864	0.340803
EMP3	-0.18992	0.827025	0.69386	0.985748	0.0339884	0.340623
SLA2	-0.103447	0.901724	0.819487	0.992213	0.0339901	0.340439
KRTAP19-5	3.0559	21.2403	1.25919	358.287	0.03402	0.34054
LRRC19	-0.204048	0.815423	0.675221	0.984738	0.0340282	0.340422
ITPRIPL1	-0.120196	0.886747	0.793455	0.991008	0.0340721	0.340661
SORBS3	-0.217538	0.804497	0.657879	0.983792	0.0340781	0.340522
HAND1	0.172135	1.18784	1.01299	1.39287	0.0341061	0.340602
SFI1	-0.235948	0.789822	0.63495	0.982468	0.0341079	0.340421
HEPN1	-0.108796	0.896913	0.811027	0.991894	0.0341381	0.340523
UNC13B	0.231769	1.26083	1.01742	1.56247	0.0341941	0.340882
TMEM181	0.211304	1.23529	1.01578	1.50223	0.0342754	0.341492
FGR	-0.158387	0.853519	0.737061	0.988379	0.0343331	0.341868
EPHB6	-0.0942821	0.910026	0.833923	0.993074	0.0343496	0.341833
BFSP2	-0.12152	0.885573	0.791283	0.991099	0.0343779	0.341914
NKAIN1	-0.0596909	0.942056	0.89137	0.995624	0.0343962	0.341898
PRKAG3	0.107937	1.11398	1.00794	1.23117	0.0344375	0.342108
ZNF468	0.271585	1.31204	1.02007	1.68758	0.0344554	0.342087
SYNE2	-0.226173	0.79758	0.646737	0.983605	0.0344715	0.342048
KCTD10	0.443682	1.55844	1.03295	2.35126	0.0344777	0.34191
EIF3H	0.234919	1.26481	1.0173	1.57254	0.0344891	0.341825
AMN1	-0.2261	0.797639	0.646794	0.983663	0.0345175	0.341907
DMRTB1	0.323822	1.3824	1.02375	1.8667	0.0345894	0.342421
SNX1	-0.290866	0.747616	0.570809	0.979189	0.0346246	0.34257
CASP4	-0.204603	0.814971	0.674072	0.985322	0.0346307	0.342432
G3BP1	0.348024	1.41627	1.02541	1.9561	0.0346628	0.342551
NUMBL	-0.240593	0.786162	0.628796	0.982911	0.0347534	0.343248
FSCN2	-0.128692	0.879245	0.780193	0.990872	0.0348297	0.343802
ZNF133	-0.259686	0.771294	0.605981	0.981703	0.0348579	0.343881
CCDC81	0.167944	1.18287	1.01197	1.38263	0.034907	0.344167
PCDHB16	0.120226	1.12775	1.00855	1.26104	0.0349123	0.344021
ANXA10	-0.283119	0.75343	0.579131	0.980186	0.0349408	0.344102
PKN3	-0.187642	0.828912	0.696208	0.986909	0.0350307	0.344789
SPRY4	0.223601	1.25057	1.01572	1.53973	0.035127	0.345537
TJAP1	-0.346173	0.70739	0.512578	0.976244	0.0351825	0.345883
TCL1A	-0.0770037	0.925886	0.861858	0.994671	0.0351961	0.345818
TREML2	-0.127066	0.880675	0.782381	0.991319	0.0353471	0.347102
XCR1	-0.139406	0.869875	0.763942	0.990496	0.0353699	0.347126
PLAT	-0.097497	0.907105	0.82834	0.99336	0.0354031	0.347252
PDCD7	-0.476473	0.62097	0.398356	0.967988	0.0354126	0.347145
CCDC88B	-0.134011	0.87458	0.771885	0.990939	0.0354842	0.347648
ZNF611	0.262847	1.30063	1.01798	1.66175	0.0355078	0.347678
IL1RN	-0.121881	0.885254	0.790177	0.991771	0.0355084	0.347486
RPS17	-0.240066	0.786576	0.628803	0.983936	0.0355759	0.347946
METTL2A	0.280384	1.32364	1.01909	1.71919	0.0355763	0.347751
APOL1	-0.147254	0.863075	0.752316	0.99014	0.0356082	0.347863
PRKG1	0.109705	1.11595	1.00741	1.23618	0.0356123	0.347704
PNKP	-0.247697	0.780596	0.619551	0.983503	0.0356354	0.34773
GDPD2	0.0832825	1.08685	1.00561	1.17465	0.0356402	0.347579
C11orf16	-0.121443	0.885642	0.790775	0.991889	0.0356537	0.347511
PRIM1	0.229404	1.25785	1.01547	1.55809	0.0356862	0.34763
ADAMTS12	0.104836	1.11053	1.00703	1.22467	0.0357085	0.347648
TRIM34	-0.20223	0.816907	0.676407	0.986592	0.0357157	0.34752
ETV6	-0.252593	0.776784	0.613637	0.983307	0.0357367	0.347526
ACADL	-0.0937705	0.910492	0.834159	0.993809	0.0358201	0.348138
SRF	-0.286875	0.750605	0.574205	0.981197	0.0358313	0.348049
TMEM115	-0.323231	0.723807	0.535158	0.978956	0.0359041	0.348558
SLC2A10	0.132131	1.14126	1.0087	1.29123	0.0359454	0.34876
PDE6G	-0.147893	0.862524	0.751194	0.990354	0.0359552	0.348657
GRAP2	-0.114498	0.891814	0.801316	0.992533	0.0359707	0.348609
SLC25A43	0.263835	1.30191	1.01734	1.66609	0.0360338	0.349023
SERPINB5	-0.0603045	0.941478	0.889869	0.99608	0.0360372	0.348857
ZFHX3	0.197953	1.21891	1.01297	1.46671	0.0360426	0.348711
NCAPD3	0.238796	1.26972	1.01566	1.58734	0.0360515	0.3486
TTC3	0.284981	1.32974	1.01867	1.73579	0.03608	0.348678
CCNJL	-0.119987	0.886932	0.792788	0.992256	0.0361041	0.348714
SLC35E1	0.361766	1.43586	1.02365	2.01407	0.0361413	0.348875
MANBAL	-0.346889	0.706884	0.510958	0.977937	0.0361993	0.349237
OPA1	0.317606	1.37383	1.02062	1.84929	0.0362109	0.349152
LRFN5	-0.114566	0.891753	0.80109	0.992678	0.0362321	0.349159
PPM1L	0.14585	1.15702	1.00937	1.32627	0.0362738	0.349363
ADH7	-0.26365	0.768242	0.600226	0.983289	0.0362781	0.349207
PBX3	-0.172138	0.841863	0.716572	0.98906	0.0362812	0.34904
RNF220	-0.32313	0.72388	0.534926	0.979578	0.036291	0.348938
IL5RA	-0.178722	0.836338	0.707475	0.988673	0.0363142	0.348964
DBX2	-0.130777	0.877413	0.776288	0.991712	0.0363342	0.34896
PTPN22	-0.118836	0.887953	0.794392	0.992533	0.036448	0.349856
TBX21	-0.0995437	0.90525	0.824634	0.993748	0.0364603	0.349777
FBXO45	0.26468	1.30301	1.01681	1.66977	0.0364622	0.349599
MGC16275	-0.243616	0.783789	0.623803	0.984806	0.0364917	0.349685
ARL6IP4	-0.205796	0.813999	0.671214	0.987159	0.0365011	0.349578
MAN2B1	-0.239289	0.787188	0.629044	0.985089	0.0365049	0.349418
LZTS2	-0.266211	0.766278	0.597077	0.983426	0.0365053	0.349226
RND2	-0.0964505	0.908055	0.829529	0.994014	0.0366115	0.350046
IL17RB	-0.139909	0.869437	0.762472	0.991408	0.0367268	0.350952
PITRM1	0.279344	1.32226	1.01735	1.71855	0.036744	0.35092
VGF	0.0805248	1.08386	1.00491	1.169	0.0368884	0.352101
KCNB2	-0.124122	0.883272	0.786062	0.992503	0.0369375	0.352373
RGS14	-0.161763	0.850643	0.730706	0.990266	0.0369686	0.352472
STAG3	-0.127185	0.880571	0.781378	0.992356	0.0369959	0.352535
MAPK1IP1L	-0.440079	0.643986	0.425816	0.973935	0.0370603	0.352953
CDON	-0.132403	0.875988	0.773468	0.992097	0.0370778	0.352922
AKAP14	-0.166057	0.846998	0.724573	0.990108	0.03709	0.352841
SGPP1	-0.145868	0.864272	0.753495	0.991335	0.0371308	0.353032
LARP4B	0.316811	1.37274	1.01908	1.84914	0.0371319	0.352846
RPL35	-0.210255	0.810378	0.664975	0.987574	0.0371704	0.353015
ARCN1	0.362325	1.43667	1.02173	2.02012	0.0371996	0.353096
ARPP21	-0.141418	0.868127	0.759962	0.991686	0.0372576	0.353449
HCLS1	-0.152913	0.858204	0.743171	0.991044	0.037298	0.353636
POLR2I	-0.27092	0.762677	0.590989	0.984243	0.0373405	0.353843
RPL22	-0.309783	0.733606	0.547988	0.982097	0.0374027	0.354235
JUNB	-0.156901	0.854789	0.737347	0.990937	0.0374612	0.354593
OR5D18	2.86962	17.6303	1.18101	263.188	0.0374713	0.354491
CATSPERG	-0.127236	0.880526	0.781054	0.992666	0.037497	0.354538
ANXA5	-0.30167	0.739582	0.556594	0.982731	0.0375182	0.354542
PNMA3	-0.0910602	0.912963	0.83788	0.994774	0.0375588	0.354729
PICK1	-0.233498	0.791759	0.635261	0.986812	0.0376986	0.355852
SYTL1	-0.156156	0.855425	0.738269	0.991174	0.0377151	0.355811
PMPCB	-0.427428	0.652184	0.435789	0.976031	0.037718	0.355642
UBFD1	0.318463	1.37501	1.01818	1.8569	0.037754	0.355785
XKR9	0.0876158	1.09157	1.00497	1.18563	0.0377599	0.355643
SLC5A12	0.0845571	1.08823	1.00475	1.17865	0.0378581	0.356372
RNF26	0.384642	1.46909	1.02169	2.11241	0.0379179	0.356738
ARHGAP25	-0.154689	0.856682	0.740249	0.991427	0.0379417	0.356765
AASDHPPT	0.313731	1.36852	1.01761	1.84044	0.0379449	0.356598
FUCA2	0.282942	1.32703	1.01584	1.73355	0.037968	0.356619
MRPL23	-0.211912	0.809036	0.662184	0.988454	0.0381165	0.357817
SLC43A2	-0.194458	0.823281	0.685042	0.989415	0.038132	0.357766
RPGRIP1	-0.169495	0.844091	0.719107	0.990797	0.038168	0.357907
IFI27L1	-0.188375	0.828304	0.69316	0.989797	0.0381897	0.357913
NRG2	-0.0920985	0.912015	0.835947	0.995005	0.0382047	0.357857
KRT80	0.120023	1.12752	1.00653	1.26306	0.0382371	0.357964
SLC31A1	0.26909	1.30877	1.01469	1.68808	0.0382377	0.357773
FASTKD3	0.353163	1.42356	1.0193	1.98817	0.0382556	0.357744
HMGCLL1	-0.0834183	0.919966	0.850155	0.99551	0.0382908	0.357877
CTRL	-0.152197	0.858819	0.743632	0.991848	0.0383246	0.357997
ASPSCR1	-0.226493	0.797325	0.643492	0.987934	0.0383625	0.358155
S1PR2	-0.239746	0.786828	0.627016	0.987372	0.0384829	0.359082
RGS2	-0.114281	0.892007	0.800488	0.993989	0.038535	0.359372
NDUFA5	-0.332434	0.717176	0.523434	0.982628	0.0385429	0.359249
GALK2	0.275048	1.31659	1.01459	1.70849	0.0385534	0.359151
BRMS1L	0.294963	1.34308	1.01565	1.77605	0.0385543	0.358963
TM2D2	0.182453	1.20016	1.00959	1.42669	0.0386227	0.359404
MYLK3	0.115457	1.12239	1.00605	1.25218	0.0386434	0.3594
RFX5	-0.297582	0.742611	0.560088	0.984615	0.038669	0.359443
PCDHB3	0.0994499	1.10456	1.00519	1.21376	0.038674	0.359293
TEKT4	-0.131835	0.876486	0.773469	0.993222	0.0387747	0.360032
RNF168	0.171813	1.18746	1.00888	1.39764	0.0388053	0.360121
PRICKLE4	-0.119012	0.887797	0.793015	0.993908	0.0388236	0.360095
ST6GALNAC4	0.169942	1.18524	1.00876	1.39258	0.038825	0.359912
CD1A	-0.0761562	0.926671	0.862057	0.996129	0.0389104	0.360507
PCSK2	0.0631812	1.06522	1.00321	1.13106	0.0389425	0.360609
WAC	0.362505	1.43692	1.01855	2.02715	0.0389576	0.360553
NPFFR1	-0.365398	0.693921	0.490522	0.981661	0.0389662	0.360438
PITPNM3	0.132579	1.14177	1.00666	1.29502	0.0390922	0.361407
PRAME	0.0401347	1.04095	1.00201	1.08141	0.0391053	0.361332
CAMK2N2	0.119067	1.12644	1.00596	1.26136	0.0391199	0.361271
TSPYL2	-0.233679	0.791616	0.633928	0.988529	0.0392305	0.362097
LSS	0.246379	1.27938	1.01217	1.61715	0.0392893	0.362443
KIR2DL4	-0.124337	0.883082	0.784603	0.993922	0.0393005	0.362351
EPHA1	-0.212438	0.80861	0.660696	0.989638	0.0393015	0.362164
PPM1M	-0.261669	0.769766	0.60019	0.987252	0.0393017	0.36197
ALG11	0.198955	1.22013	1.00974	1.47435	0.039363	0.362339
HLA-DRA	-0.13889	0.870324	0.762607	0.993256	0.0393655	0.362167
GPX1	-0.233685	0.791611	0.633703	0.988867	0.0395337	0.363518
IDO1	-0.0708144	0.931635	0.870872	0.996637	0.0396053	0.36398
TWIST2	-0.117308	0.889311	0.795281	0.994459	0.0396462	0.36416
ETV7	-0.108836	0.896878	0.808546	0.994859	0.039648	0.36398
GRB10	0.222658	1.24939	1.01059	1.54462	0.0396538	0.363838
TXNRD1	0.207174	1.2302	1.00983	1.49865	0.0396747	0.363834
DCP1B	-0.295521	0.744144	0.561531	0.986143	0.0396773	0.363662
SLC25A35	-0.176515	0.838186	0.708399	0.991751	0.0397375	0.364019
TRPV3	0.100183	1.10537	1.0047	1.21613	0.0397563	0.363995
SLC38A7	0.245447	1.27819	1.01156	1.61511	0.0397578	0.363814
PRKAA2	-0.0754029	0.92737	0.863053	0.996479	0.0397683	0.363715
FRG2B	0.178836	1.19582	1.00838	1.41811	0.039788	0.3637
MASTL	0.204472	1.22688	1.00957	1.49096	0.0398115	0.36372
AIMP2	0.316048	1.3717	1.01476	1.85419	0.0398574	0.363944
GPR153	-0.172268	0.841754	0.714229	0.992048	0.039858	0.363755
BAG1	-0.214193	0.807193	0.658057	0.990127	0.0398632	0.363608
PSMD14	0.326177	1.38566	1.0152	1.89131	0.039881	0.363576
KIF21A	0.174299	1.19041	1.00807	1.40574	0.039908	0.363627
PKHD1	-0.097395	0.907198	0.826709	0.995522	0.039914	0.363488
MTHFR	-0.189809	0.827117	0.690104	0.991332	0.0399587	0.363701
RPS14	-0.247679	0.780611	0.616312	0.988708	0.0399616	0.363533
FBXO34	-0.388701	0.677937	0.467857	0.982347	0.0399675	0.363393
CYP4F3	-0.0878513	0.915897	0.842238	0.995998	0.0400031	0.363523
RCL1	-0.287778	0.749928	0.56983	0.986949	0.0400032	0.36333
DIO3OS	-0.212736	0.808369	0.659757	0.990457	0.0401231	0.364226
GTF2IRD2P1	-0.231794	0.793109	0.635603	0.989647	0.0401606	0.364372
TCEAL2	-0.101302	0.90366	0.820317	0.99547	0.0401773	0.36433
ITGAL	-0.117572	0.889076	0.794624	0.994755	0.0401958	0.364304
ATN1	-0.329201	0.719498	0.525351	0.985395	0.040203	0.364176
CLECL1	-0.12848	0.879431	0.777841	0.994289	0.0402263	0.364193
OTOR	0.0977893	1.10273	1.00436	1.21073	0.0402377	0.364103
GSTO1	-0.329462	0.719311	0.525049	0.985446	0.0402432	0.36396
MID2	0.229786	1.25833	1.01027	1.56729	0.0402463	0.363795
GRINA	0.23198	1.26109	1.01028	1.57418	0.0403293	0.364352
CD37	-0.137721	0.871342	0.763809	0.994015	0.0404336	0.365101
GPLD1	-0.12269	0.884538	0.786603	0.994666	0.0404339	0.36491
WNT5A	-0.108818	0.896894	0.80823	0.995284	0.0404643	0.364992
SLC6A19	0.231344	1.26029	1.01008	1.57248	0.0404812	0.364951
PGAM1	0.369324	1.44676	1.01612	2.05989	0.0404929	0.364864
CCNI2	-0.098604	0.906101	0.82452	0.995755	0.0405273	0.364981
AMH	0.0857915	1.08958	1.00368	1.18283	0.0405939	0.365388
MYOC	-0.128343	0.879551	0.77786	0.994537	0.0406235	0.365461
LAX1	-0.0877992	0.915945	0.842084	0.996284	0.0406825	0.365799
NXPH4	0.0834121	1.08699	1.00354	1.17738	0.0406881	0.365657
ZNF655	-0.178588	0.83645	0.70494	0.992495	0.0407282	0.365824
MORN1	-0.130734	0.877451	0.774159	0.994526	0.0407693	0.366001
CACNA1E	-0.136447	0.872453	0.765541	0.994295	0.0407814	0.365917
ABHD1	-0.125242	0.882283	0.782497	0.994793	0.0408343	0.366199
GDI2	0.303119	1.35408	1.01266	1.8106	0.0408727	0.366351
TBCEL	0.278304	1.32089	1.0116	1.72474	0.0408864	0.366281
NKX2-3	0.120938	1.12855	1.00498	1.26732	0.040961	0.366757
HLTF	0.220419	1.2466	1.00909	1.54001	0.040966	0.366609
GRPEL1	0.34094	1.40627	1.01394	1.95041	0.0410636	0.36729
TRANK1	-0.181554	0.833973	0.700626	0.992699	0.0411119	0.367529
CSMD2	0.108432	1.11453	1.00438	1.23676	0.041126	0.367462
ZFP36L2	-0.182734	0.83299	0.698995	0.99267	0.0411334	0.367336
CTXN3	-0.349774	0.704847	0.503834	0.986057	0.0411582	0.367366
UBR1	0.22814	1.25626	1.00918	1.56384	0.0411764	0.367335
LY6G5C	-0.178146	0.83682	0.705237	0.992954	0.041253	0.367827
DPYSL5	0.0647515	1.06689	1.00257	1.13534	0.0412536	0.36764
SLC7A11	0.107847	1.11388	1.00428	1.23543	0.0412661	0.367559
RBM42	-0.249474	0.77921	0.613129	0.990279	0.0413665	0.368261
EFCAB2	-0.1822	0.833435	0.699565	0.992922	0.0414025	0.368389
LAMP2	0.278894	1.32167	1.01091	1.72795	0.0414178	0.368333
NDST4	0.0780045	1.08113	1.00304	1.1653	0.0414222	0.368181
CHGA	-0.0890292	0.914819	0.839793	0.996548	0.0414329	0.368084
HIVEP3	-0.225583	0.798051	0.642481	0.99129	0.0414461	0.36801
ACYP1	-0.216215	0.805562	0.65439	0.991657	0.0414526	0.367875
TTC16	-0.121691	0.885422	0.787655	0.995324	0.0415024	0.368126
ADPGK	-0.435794	0.646751	0.425358	0.983376	0.0415125	0.368024
UNC93B1	0.20681	1.22975	1.00794	1.50037	0.0415627	0.368278
TPMT	-0.293383	0.745737	0.562263	0.989081	0.0417344	0.369607
NSMCE2	0.253775	1.28888	1.00951	1.64557	0.0417642	0.36968
AMBN	0.243933	1.27626	1.00907	1.6142	0.0418226	0.370004
SSX2IP	-0.24295	0.784311	0.620694	0.991058	0.0418298	0.369876
KLK1	-0.104922	0.900395	0.813847	0.996145	0.0418645	0.369991
CAPN3	-0.133019	0.875448	0.770115	0.995189	0.0419815	0.370833
ATP6AP1	0.272511	1.31326	1.0099	1.70775	0.0420083	0.370878
OR52N5	0.349083	1.41777	1.01257	1.98511	0.0420819	0.371335
IFITM1	-0.119773	0.887122	0.790355	0.995736	0.0421059	0.371355
AZIN1	0.232449	1.26169	1.00829	1.57876	0.0421386	0.371451
IL27	0.157618	1.17072	1.00559	1.36296	0.0421709	0.371544
SCRT1	0.110951	1.11734	1.00392	1.24358	0.0422022	0.371628
ATP8A2	0.0821663	1.08564	1.0029	1.1752	0.0422031	0.371444
IQCJ	0.153751	1.1662	1.00542	1.35269	0.0422194	0.371396
NUDT18	-0.173601	0.840632	0.710972	0.993938	0.0422449	0.371429
SLC7A5	0.102144	1.10754	1.00356	1.2223	0.042301	0.37173
RBMY1A1	0.403277	1.49672	1.014	2.20925	0.0423644	0.372096
PLD4	-0.0950334	0.909343	0.829616	0.996731	0.0423658	0.371917
IRF9	-0.186648	0.829736	0.692889	0.99361	0.0423896	0.371934
TSPAN7	-0.108283	0.897374	0.808271	0.9963	0.0424135	0.371952
C3	-0.108207	0.897442	0.80838	0.996316	0.0424398	0.371992
RNF183	-0.0719629	0.930565	0.868073	0.997557	0.0424652	0.372024
KRT19	-0.110223	0.895634	0.805162	0.996273	0.0424902	0.372051
OR51E1	0.164764	1.17911	1.00559	1.38259	0.0425053	0.371992
STK3	0.255972	1.29172	1.00866	1.65421	0.0425319	0.372034
TMPRSS3	-0.0607167	0.94109	0.887447	0.997975	0.0425951	0.372396
TIRAP	0.271792	1.31231	1.00911	1.70662	0.0426008	0.372255
ATP13A2	-0.241115	0.785751	0.622333	0.992082	0.0426843	0.372793
NUMA1	-0.25287	0.776569	0.608079	0.991744	0.0427236	0.372946
UBA1	0.366716	1.44299	1.01203	2.05746	0.0427614	0.373085
HLA-B	-0.155518	0.855972	0.73639	0.994973	0.0428047	0.373272
SPEF1	-0.0833989	0.919984	0.848638	0.997328	0.0428746	0.37369
BPI	-0.0836117	0.919788	0.848279	0.997326	0.0428866	0.373604
ARHGAP39	0.216927	1.24225	1.00693	1.53257	0.0429288	0.373781
GPR174	-0.0946174	0.909721	0.830081	0.997002	0.0429493	0.373768
UPK3A	-0.0912192	0.912818	0.835634	0.99713	0.0429993	0.374013
CYSLTR2	-0.133331	0.875175	0.769146	0.995821	0.0430188	0.373991
ACTG2	-0.0695884	0.932778	0.871958	0.99784	0.0430908	0.374427
NAPSA	-0.151818	0.859145	0.74158	0.995347	0.0431673	0.3749
LYSMD2	-0.162514	0.850004	0.726115	0.995031	0.0431825	0.374842
IL24	-0.104848	0.900461	0.813439	0.996793	0.0431858	0.374679
TMEM105	0.0896757	1.09382	1.00275	1.19316	0.0431893	0.374519
BMP8B	0.116125	1.12314	1.00353	1.257	0.0432475	0.374834
RPL31P11	-0.220753	0.801915	0.647311	0.993444	0.0433671	0.375679
SCGB1A1	-0.227595	0.796447	0.638637	0.993253	0.0433782	0.375585
RUNX3	-0.11362	0.892597	0.799424	0.996629	0.0433836	0.375441
WDR86	-0.101139	0.903807	0.819321	0.997005	0.0433976	0.375372
CLTC	0.189622	1.20879	1.00558	1.45307	0.0434661	0.375774
CD38	-0.073747	0.928907	0.864723	0.997854	0.0435109	0.37597
RDX	0.215787	1.24084	1.0063	1.53003	0.0435123	0.375792
MFSD9	0.252661	1.28745	1.00734	1.64544	0.043552	0.375945
TBC1D28	0.516958	1.67692	1.01487	2.77085	0.0436354	0.376474
FBLL1	-0.0858235	0.917756	0.844286	0.99762	0.0438063	0.377757
ZNF548	-0.259714	0.771272	0.599156	0.992831	0.0438201	0.377685
SUN3	0.181254	1.19872	1.00498	1.4298	0.0438788	0.378001
BCAN	-0.0881974	0.91558	0.840317	0.997584	0.0438811	0.377829
SDCBP2	0.12063	1.12821	1.00329	1.26868	0.0439245	0.378012
DVL2	-0.336701	0.714122	0.514614	0.990977	0.0439898	0.378383
GAL3ST1	-0.121603	0.8855	0.786662	0.996757	0.0440344	0.378576
DEAF1	-0.245906	0.781996	0.615528	0.993484	0.0440629	0.37863
SCARNA5	-0.182496	0.833188	0.697557	0.99519	0.0440982	0.378743
ZCCHC3	-0.321182	0.725291	0.530527	0.991556	0.0441029	0.378592
CYP4F22	-0.056362	0.945197	0.894717	0.998525	0.0441474	0.378784
EIF2AK3	0.281519	1.32514	1.0074	1.7431	0.0441477	0.378596
GBP3	-0.112045	0.894004	0.801569	0.997099	0.0442047	0.378894
ZW10	0.280693	1.32405	1.00729	1.74041	0.0442132	0.378777
PTPN23	-0.413361	0.661423	0.442163	0.989411	0.044244	0.37885
PRKG2	0.1034	1.10893	1.00266	1.22648	0.0442626	0.37882
UGT3A2	-0.0972954	0.907288	0.825227	0.99751	0.0442711	0.378702
RPL23A	-0.260412	0.770734	0.597929	0.99348	0.0443816	0.379457
ST8SIA6	-0.0684058	0.933881	0.873634	0.998284	0.0443838	0.379286
IDO2	-0.144565	0.865399	0.751612	0.996412	0.044438	0.379559
THTPA	-0.239904	0.786704	0.622502	0.994218	0.0445888	0.380657
ZNF347	0.214797	1.23961	1.0052	1.52868	0.0445938	0.380509
[truncated: 149 more rows]
