# Supplementary material for: In Silico Evaluation of Natural Compounds for an Acidic Extracellular Environment in Human Breast Cancer
Source: Cells. 2021 Oct 6;10(10):2673. doi: 10.3390/cells10102673 (PMC8534855; doi:10.3390/cells10102673)
Supplement: Supplementary file 1 [file cells-10-02673-s001.zip › Table_S2.xlsx]

## Sheet: Sheet1
Table S2 Total genes for DEG analysis between pH 6.5 and pH 7.6
Gene	Fold change	P-value
LGI4	1.01455	1.55047e-08
MAGEC2	1.01455	1.55047e-08
DPY19L2	1.01455	1.55047e-08
DPPA2	1.01455	1.55047e-08
FBXO39	1.01455	1.55047e-08
PABPC5	1.01455	1.55047e-08
RIPK3	1.01455	1.55047e-08
RNASE7	1.01455	1.55047e-08
PLCL1	1.01455	1.55047e-08
LRRTM4	-1.01623	3.37296e-08
IL6	-1.01623	3.37296e-08
MIR155HG	-1.01623	3.37296e-08
CDH17	-1.01623	3.37296e-08
PTGER1	-1.01623	3.37296e-08
DEFB1	-1.01623	3.37296e-08
OGN	-1.01623	3.37296e-08
PCDH17	6.92034	3.58704e-08
CEP68	0.748813	2.51078e-07
KCNJ3	-1.30989	5.39204e-07
ERBB4	-5.11136	3.25859e-06
VPS26B	0.47595	3.84014e-06
SNX8	-0.314479	4.60839e-06
ZNF624	0.730685	1.40432e-05
CEP70	0.912367	2.0725e-05
RRAGC	-0.646493	2.59594e-05
CAB39L	-1.8605	3.00013e-05
KCNMA1	-3.11336	3.34502e-05
DLL4	-3.94465	3.46316e-05
ZP3	1.65894	3.502e-05
LINGO3	3.37387	3.53374e-05
CCDC146	2.42775	4.14691e-05
LRRC15	1.82588	4.52135e-05
TACC1	-0.753289	4.62363e-05
PPM1L	-1.27276	4.96924e-05
KISS1R	1.41659	5.28353e-05
RAB21	-0.30864	5.487e-05
RASD2	2.91983	5.8952e-05
B3GALT1	-5.9881	6.23415e-05
FOXI1	4.76047	6.29535e-05
PTPN1	-0.240792	6.56781e-05
TTLL7	-2.06208	6.67843e-05
ADAT1	-0.405755	6.92117e-05
ZNF182	0.311561	6.99925e-05
ASTN2	-1.24826	7.21366e-05
KIAA0319L	-0.564198	7.29236e-05
PACRGL	0.429145	7.53754e-05
ADCY7	1.56609	7.7127e-05
C5orf58	2.50696	7.73899e-05
CCNJL	2.20658	8.20633e-05
DNAJA4	-1.3934	8.30432e-05
SMAD5	0.899666	9.29624e-05
NPL	-1.28562	0.000102421
EIF2A	0.553614	0.000103837
UBP1	-0.527551	0.000107204
LOC284379	3.3109	0.000107318
ANKRD27	0.677027	0.000108356
TLR2	-3.95484	0.000108848
NUAK1	0.99891	0.000116919
ADA	2.92042	0.000118483
GYG2	1.8744	0.000122925
CCDC51	-0.573563	0.000130381
N4BP3	2.00483	0.000130496
NIPSNAP1	0.613303	0.000136049
PMP22	-4.17855	0.000137438
PCGF5	0.547992	0.00013893
RAI2	-3.97575	0.000140272
CLYBL	1.08824	0.000150012
ADAMTSL5	0.548564	0.000150281
PEX5	0.700606	0.000155847
PTPRG	-0.851072	0.000164428
MESP2	3.73497	0.000171135
IDH2	1.12124	0.000175497
RASGRP2	1.74272	0.000176205
DSG2	0.534418	0.00018166
KLK8	5.26255	0.000187091
FKBP10	0.781572	0.000191027
FRMD3	1.50055	0.000194116
VCAN	-5.32703	0.000199227
NLRX1	0.729771	0.000204907
PALLD	-1.91494	0.000211845
AVL9	0.345023	0.000212145
KYNU	-1.02049	0.000217684
C11orf54	0.885993	0.000217873
C2orf50	0.980129	0.000218086
ACAA1	-0.813662	0.000219263
PHLDB1	0.922675	0.000219306
CPNE4	-3.44208	0.000220257
GNAZ	1.13268	0.000226634
DDX60L	-3.80649	0.000233797
CXXC4	2.48702	0.000233939
MIPEP	-0.957528	0.00023458
ESYT2	0.466138	0.000234708
TLE4	-2.46847	0.000239125
KCNN2	1.10774	0.000241059
ULK2	0.963249	0.000242067
HMGN5	-1.80211	0.000242301
SLC25A43	0.477201	0.000244572
KRTCAP3	1.45991	0.000245217
ZNF3	0.339356	0.00024538
VAMP4	1.19604	0.000245815
HEYL	1.49646	0.000246818
PITX1	1.39721	0.000261035
CMIP	0.668763	0.000262783
ARHGAP5	-0.802634	0.000264543
MMD	2.11567	0.00026972
GUCY1A2	-4.52993	0.000283142
TPM4	0.611664	0.000290482
LIMD1	-0.391867	0.000293923
DENND4A	0.547859	0.000295279
FGFR1OP2	0.545866	0.000298356
KRBA1	1.39257	0.000298788
ZNF148	0.656703	0.000302174
SAP30BP	-0.230399	0.00030305
MARVELD1	-0.651141	0.000304463
PRR15	-2.32703	0.000312403
TCEA3	0.99959	0.000314881
SENP7	0.547391	0.000315241
AK1	-0.86117	0.000318744
PCTP	0.952037	0.000323719
GHR	-5.97372	0.000328952
SIRPA	-2.02855	0.00032919
CALCR	-4.9128	0.000332691
WDR41	0.719265	0.000333653
HMCN1	4.31122	0.000339198
SKIL	1.1708	0.000342688
PLXNB1	-0.490536	0.000350923
RFX7	0.782166	0.000353088
AKAP5	-3.07393	0.000354036
COCH	1.52713	0.000356685
SYT13	4.61303	0.000364529
GPC6	-5.05897	0.0003662
COL4A5	-1.31931	0.000370553
COL9A2	-1.12394	0.000374868
ADNP	0.271441	0.000384484
PPFIBP1	-0.792562	0.000386874
ZNF331	0.861758	0.000391667
ERCC8	0.625022	0.000391708
ETV3	0.178712	0.000392387
TXLNB	-2.35904	0.000403143
DET1	0.808665	0.000405582
BEND3	-0.300443	0.000410851
RBM6	-0.419926	0.000411205
SHISA5	-0.811951	0.000413894
SOX2	-2.27425	0.000414706
GAB2	-0.881783	0.000421063
VGF	-3.22988	0.000429125
CXCR6	-2.53982	0.000429624
PCBP4	-0.863135	0.000430015
G6PC3	-0.588389	0.000433999
FN3K	1.10637	0.000434263
THRSP	3.00956	0.000434673
ZNF404	1.87632	0.000434806
GCKR	-3.44754	0.000436994
STRN4	0.669095	0.000449115
IGF2BP2	-3.70121	0.000455289
ST6GALNAC5	3.64431	0.000457653
FAM117B	1.09172	0.000459444
AFF3	-5.1662	0.000466272
ADCK5	-0.586527	0.000473573
SKAP1	4.20977	0.000475267
ACOT2	-1.21617	0.000486021
PGD	-0.588386	0.000490176
RMND5B	0.935243	0.000490539
HSPG2	1.32522	0.000491573
SERPINF2	0.963722	0.000492555
ENSA	-0.313907	0.000496754
FLT3LG	1.28055	0.000502653
ARPC5L	-0.680802	0.000506148
CD164	-0.564136	0.000508183
LRRC4B	1.6535	0.000509048
IFRD2	-0.784134	0.000513392
SIPA1L2	-1.13444	0.000514033
SH3PXD2B	1.44848	0.000514143
MAML1	0.586069	0.000516286
AMPH	-4.06597	0.000516736
TMCO6	0.751366	0.000519948
DRD2	-4.56061	0.000526355
MEGF9	-0.889417	0.000536873
SLC26A2	-1.36523	0.000542233
MYO10	0.674356	0.000543117
ZNF212	0.629426	0.000544621
MBD4	0.60251	0.000550605
TRIP11	-0.51659	0.000559438
HTT	-0.314434	0.000563799
PITPNM3	2.02831	0.000571528
B4GALNT4	0.632531	0.000575328
ZNF775	1.29721	0.000575706
TUBB2A	-1.59329	0.000588557
PWWP2A	0.426311	0.000588605
ARRDC2	0.569969	0.000588705
TRIM37	0.34609	0.000595441
MT2A	-2.40862	0.00059579
TMEM25	-1.40899	0.000597092
CDC14B	1.64433	0.000600363
NKD1	1.91922	0.000603309
CA10	2.96216	0.000603579
WIPF1	2.84013	0.000604501
TCF4	2.88185	0.000607213
LACTB	-1.34484	0.000608828
MSRA	-1.04271	0.000612237
TBX3	-0.524614	0.000615378
GPRIN3	6.24036	0.000620098
ITGAX	1.98934	0.000620788
TCTN2	1.35085	0.000627153
UBE2G1	0.653258	0.000629595
TWSG1	-0.57224	0.000631906
NUDT7	1.15416	0.000632263
STXBP5	-1.01064	0.0006671
PTH1R	3.44779	0.000680844
WFDC2	-3.52909	0.00068635
KLK13	3.37167	0.00069165
ATP6V1E2	0.55907	0.000695785
PDE9A	2.73205	0.000704699
EYA2	2.07924	0.000718729
SPANXA2	4.55943	0.000720251
PRDM2	-0.626983	0.000726911
PDLIM5	-1.07206	0.000730961
RGL3	3.43248	0.000766773
ZNF618	1.25188	0.000782786
CELSR3	-1.08512	0.00078972
GPR137C	-1.90693	0.00079327
FN1	0.803775	0.000798497
EML5	-4.39576	0.000805855
BLK	2.5648	0.000809085
NCAM2	1.28786	0.0008105
PPM1K	-1.20649	0.00081072
TMEM63C	-0.973186	0.000814117
PGM5	2.59205	0.000822504
KLHDC10	0.542879	0.00083593
EPHA3	-4.01851	0.000843956
COQ10A	-0.353544	0.000845325
GTF3C6	-1.23182	0.000847399
IPO13	-1.09762	0.000856743
PRKX	0.76885	0.000865351
MON1B	0.366163	0.000873437
PABPC1L2B	-1.65635	0.000880208
EPB41L2	-3.0707	0.000889814
ANO10	-0.71158	0.000891504
CDH18	-3.46724	0.000891607
TMPRSS4	2.746	0.000895344
ATP6V0D1	-0.607481	0.000899924
MICAL1	-1.17499	0.000910863
UROD	-0.515825	0.000917975
NCKIPSD	-0.848063	0.000923681
ZNF275	0.791183	0.000929015
MFHAS1	0.37824	0.000930512
IL10RA	3.77303	0.000933984
ATP6V0A2	-0.614877	0.000936918
NFATC2	1.80803	0.00094567
PPP2R3A	1.24783	0.000960463
PDE4D	-2.74877	0.000963765
PRRC1	0.41079	0.000971611
DAP	-0.64397	0.000972431
TBX1	2.43255	0.000988366
NUBPL	0.43985	0.000988471
GBAP1	-0.801455	0.000995663
DNLZ	-0.882328	0.000997041
RPS19BP1	-0.356195	0.00101036
DENND5B	-1.17113	0.00102748
COL2A1	-2.94368	0.00102821
ABCB10	-0.308386	0.00102822
PIGM	-0.494411	0.00102829
CADM4	1.13849	0.00103286
ZNF814	-0.875151	0.00103326
NRXN3	-3.71071	0.00103498
FAM110B	-1.66352	0.00103898
MET	1.32865	0.00104557
C19orf48	0.455415	0.00105225
SLC30A4	1.91014	0.00105332
LSM11	0.873399	0.00105927
GMPR	-1.35472	0.00106067
SLC1A3	-2.51699	0.00107143
CNOT6	0.411366	0.00107465
EAF2	-1.47486	0.00107512
COPG2	0.771371	0.00107589
TMBIM1	1.18281	0.0010781
OSBPL10	-0.579902	0.0010835
NUB1	0.507763	0.0010928
DCBLD1	-0.82307	0.00110048
FGF12	-1.74446	0.00110775
ATP6V1B1	2.88721	0.00111
PRKCSH	0.383229	0.00112452
CBX7	0.732087	0.00112719
TMEM39A	0.716379	0.00112816
SURF2	-0.363781	0.00113681
ZNF497	0.725769	0.00113893
CCDC93	-0.391802	0.00115004
TMEM125	-0.741498	0.00115496
UGT1A7	3.04668	0.00116674
VEGFC	-1.3839	0.00116674
GPC4	-0.904977	0.0011709
TAF10	-0.196526	0.00119
CCNG1	0.742332	0.00119567
BTN3A2	1.57841	0.00119771
MLH3	0.547776	0.00119928
DPP8	0.267587	0.00121267
EPHA1	1.24295	0.00121366
TTC37	0.466224	0.00122689
TMEM37	1.57368	0.00122697
LDLRAP1	-0.451338	0.00124103
ZNF671	-1.61808	0.00124186
RUFY1	0.626259	0.00125255
GSS	-0.471633	0.00125298
HEATR5A	-0.943869	0.00125534
TRIM27	-0.435154	0.00126022
NSFL1C	-0.717785	0.0012656
TPPP3	1.77029	0.00129135
KCNJ4	2.68043	0.00129446
ANKRD34A	-1.46919	0.00130206
ABHD5	-0.941965	0.00133389
SWAP70	-0.480592	0.00135379
DDC	-4.83085	0.00135872
MON1A	-0.792874	0.00136011
MLLT6	0.402913	0.00136355
RTN4RL2	0.84376	0.00136441
PCP4L1	-1.56209	0.00136957
CDH12	4.01152	0.00136958
CDK18	0.954108	0.0013837
MEX3C	0.61024	0.00139231
GABRP	6.01565	0.00139924
CTU1	0.553063	0.00141467
RHOH	-1.94226	0.0014181
COL3A1	3.60017	0.00142337
ASXL1	0.185953	0.00142688
AGK	0.434034	0.00142978
AMOT	-2.32932	0.00143973
RRS1	-0.714032	0.00145141
CCL15	-2.47467	0.00145342
FAF2	0.416845	0.00147303
DMRTA1	-2.30704	0.00148046
FOSL2	1.09934	0.00148999
TTC7B	0.900666	0.00149199
ASCC2	-0.241146	0.00149225
CC2D1B	-0.859693	0.00149821
ARHGAP17	-0.501379	0.00152277
GLO1	0.615863	0.00152853
BCKDHA	0.945447	0.001529
FAM83B	-0.493448	0.00153614
GPR63	-1.52642	0.00154572
ARHGEF6	2.07256	0.00154947
TFRC	-1.05775	0.00154975
ZNF860	-1.51542	0.00155215
C15orf61	0.636308	0.00156859
SLC25A1	-0.726554	0.00157432
HELLS	-0.705332	0.00158279
HES4	-0.598479	0.00160901
C10orf67	2.62005	0.00161681
MAPK13	-0.444054	0.00162227
CACNA1I	1.79527	0.0016267
SLC25A30	-1.79734	0.00166375
RAB5C	-0.429515	0.00168612
ING3	0.885726	0.00168727
PYGO1	2.46157	0.00168882
GUK1	-0.682864	0.00169097
VCPIP1	-0.517184	0.00169397
TOX2	2.78222	0.00169996
ADAMTS18	5.25372	0.00170145
B9D1	0.871076	0.00170412
ARL4D	2.86442	0.00170836
LANCL2	-0.18505	0.00173303
TMEM67	0.860933	0.00175018
FXR1	0.258809	0.00175187
SDCBP	-1.18777	0.00175453
SCN5A	1.00656	0.00176552
ZSCAN5B	2.07704	0.00177398
RBM5	-0.588993	0.00177817
SMOC2	2.60664	0.00179348
APH1B	-1.11154	0.0017964
WNT6	4.04211	0.00181187
TRDMT1	0.611654	0.00182327
ZMYND8	-0.610083	0.00182345
PIGB	0.604632	0.0018274
DLX4	1.50422	0.00183218
PREP	-0.56426	0.00183431
TMEM161A	0.788821	0.00184053
RPRM	-1.1627	0.00185833
ZNF385B	-3.77905	0.00186608
CNNM3	-0.385602	0.00187079
SNED1	2.24397	0.00187486
ABCF1	-0.33544	0.00188402
METTL2B	0.423875	0.00188963
SPESP1	1.58824	0.00189277
MACF1	-0.482164	0.00189395
RHOF	0.994098	0.00189438
TTBK2	0.767806	0.00189812
TMEM213	4.22862	0.00190043
SND1	0.502296	0.00190568
RABEP2	-0.306536	0.00190625
AUTS2	-1.22297	0.00190837
ENTPD5	-0.487358	0.00190975
RNF150	2.81471	0.00191093
DPY19L2P1	3.22968	0.00191437
KCTD5	0.299789	0.00191738
OTOR	-1.85459	0.00191874
ABCB4	-1.73588	0.00192556
SGSH	-0.638242	0.00192707
COMMD5	-0.598109	0.0019291
SPON1	1.46238	0.00193337
ZDHHC3	-0.571696	0.00193474
CADPS2	-1.57866	0.00195571
APCDD1	2.78115	0.00195849
ZNF121	-0.82586	0.00195971
TPI1P2	-0.802824	0.00195981
BCAP29	-0.484101	0.00196926
MED26	0.280979	0.00197249
DPY19L1	-1.07348	0.00197358
CD7	1.40748	0.00197473
MCTP2	1.6112	0.00198568
MAMDC4	-1.30913	0.00199061
SPTBN1	-1.26303	0.00199227
RNF180	1.96473	0.00199448
NDUFS4	0.784209	0.00200955
DNMT3A	0.465777	0.00201722
PRMT6	-0.458915	0.00205094
FAM111A	-0.887873	0.0020523
SSH1	0.577587	0.00205462
OLFML2A	0.995882	0.00205803
SLC39A14	0.675499	0.00206899
TTC17	0.609186	0.00207883
PACSIN1	0.859711	0.00207903
USPL1	0.790504	0.00210159
IRX3	-1.67043	0.00210626
MYO5A	-0.655187	0.00210999
SECTM1	3.76956	0.00211141
BEND7	0.945868	0.00212599
TUT1	0.261913	0.00212795
NPTX1	-3.01	0.00213115
SEMA3F	-0.90753	0.00213705
LRRC1	-0.429884	0.00213803
C3orf70	-2.036	0.00214244
EXOSC6	-0.375326	0.00214429
ATF5	-0.61731	0.00214719
DNAJC24	0.51028	0.00215287
FAM126B	-0.4702	0.00215784
ERP29	-0.358008	0.00217023
OOEP	0.60116	0.00217409
GPR27	-0.612235	0.00217414
CARM1	0.350626	0.00218511
FAIM	-0.60147	0.00219147
ALDH3A2	0.575958	0.00219249
SAMD8	0.214885	0.00219609
AKR1B15	1.67153	0.00220549
TLN2	-0.927363	0.00221108
CAMK2N2	-1.32218	0.00222578
ARV1	0.749778	0.00222938
SEC24B	0.19499	0.00223312
EML6	-1.13311	0.00224537
YIF1B	0.460825	0.00225533
NBPF3	0.383146	0.00226567
TBC1D1	0.456882	0.00228142
ANGEL2	0.313029	0.00228433
MAML3	0.785154	0.0022876
TMEM87B	-0.747753	0.00229717
NR1I2	1.40922	0.0023085
MEP1B	1.40922	0.0023085
GPSM1	0.833796	0.00231736
UBA7	0.903451	0.00232153
SFMBT2	-1.75894	0.00232484
FAAH2	-0.650993	0.00232784
DYNC1LI2	-0.147116	0.00233494
CACHD1	-1.17532	0.00234117
PAFAH1B1	0.236561	0.00234859
SLC35A3	-0.358453	0.00234948
TPCN2	0.534196	0.00235029
VSTM2L	4.01504	0.00236095
SH3BGRL	-1.9511	0.00236258
WDR6	-0.650425	0.00236295
DYRK4	1.14109	0.00236655
TNNT1	2.21985	0.002378
UAP1L1	-0.731797	0.00238097
SCYL1	-0.243922	0.00238561
VDR	-1.19215	0.00238768
CLDN20	-1.41167	0.00239102
SLC25A41	-1.41167	0.00239102
FNDC8	-1.41167	0.00239102
CAMK2D	-0.711196	0.0023957
DSCAML1	1.48648	0.00239915
COL23A1	2.28581	0.00240373
TFAP2A	-0.667029	0.0024045
ZNF287	0.663503	0.00242206
BIN3	0.392988	0.00242685
UBR1	0.316117	0.00243342
KDM3B	0.430501	0.00243847
AR	-1.90472	0.00244046
SNAI1	0.902628	0.00244501
ELMO2	-0.428101	0.00244834
ADAMTS1	-2.04844	0.00244967
ACAA2	0.569829	0.00245249
PI15	3.38377	0.00245448
ZNF777	0.358527	0.00246537
NR4A2	-0.683048	0.00246741
FAM83F	-2.53363	0.002472
ARIH2	-0.322761	0.00247973
TESK1	-0.705064	0.00248637
PNCK	1.57486	0.00250046
FAT4	-4.17405	0.00250831
DLST	-0.226715	0.00251222
LRFN5	2.22532	0.00251585
CHRNA10	-1.53515	0.00252228
ASRGL1	1.86781	0.00252607
TNFAIP2	1.92497	0.00253009
HSPA12A	0.557853	0.00253303
PLA2G3	3.28324	0.00253563
SCML1	-1.1899	0.00253731
WDR86	1.44387	0.0025459
FAM102B	0.928334	0.00255006
RSBN1	0.809509	0.00255328
PRKG2	2.72808	0.00255609
CENPB	-0.654819	0.00256907
DOC2A	1.02437	0.00257275
C1orf115	-1.07957	0.00257586
CFL1	-0.723911	0.00257663
XYLB	-0.961967	0.0025871
LZTS2	0.337975	0.00260437
ZNF326	-0.408543	0.00260717
NDUFA10	0.185462	0.00260902
PLA2G4C	-1.61292	0.00261535
SNAP25	2.14933	0.00261879
SERPING1	2.70802	0.00262193
TSPYL5	1.2252	0.00262379
CSNK1E	0.454145	0.00263323
FZD2	1.41085	0.00263927
ANKRD10	0.401888	0.00265939
PSD2	3.38352	0.00266115
SOX8	2.64262	0.00266298
TLE6	1.03389	0.00266442
DHCR24	-1.02566	0.002665
IGF2	1.58375	0.00267286
GPBP1	0.607862	0.00268757
KCNH1	-1.27395	0.0026997
BTBD2	0.49604	0.00270125
DNAH8	2.40671	0.00270543
TRIM36	-1.02661	0.00272312
PRDM6	-0.674241	0.00272595
HLTF	0.644181	0.00273835
FGD6	-0.594448	0.00274422
KBTBD11	1.79294	0.00274822
SQLE	-1.23331	0.00275383
GSTM1	3.49081	0.00276055
PAXIP1	0.513305	0.00277338
TC2N	-0.486904	0.00277818
NUP43	0.306392	0.00278242
DIO3OS	2.68618	0.00278246
NCAM1	-3.45679	0.0027915
MYD88	-0.638584	0.00281059
SLC34A2	2.70425	0.00281905
ZC3HAV1	-0.310228	0.00282038
AXIN1	0.413175	0.00283019
C9orf43	-1.49242	0.00283703
CA9	4.52097	0.00287019
AHCYL1	0.420334	0.0028779
RFXANK	0.673415	0.00288057
ZSWIM4	2.1003	0.0028808
CYTH1	0.228124	0.00288287
FMOD	-1.21109	0.00288298
ZNF544	-0.360687	0.00288972
ATRIP	-1.1468	0.0028915
PAX6	-1.84092	0.00289447
ST3GAL3	-0.392578	0.00289796
FFAR2	-0.98624	0.00291359
BST2	1.43158	0.00292765
CDC42SE2	0.48684	0.00293464
CRABP1	1.86348	0.00293586
PGBD1	-1.11057	0.00293661
USP46	0.290542	0.00294301
FBXL15	-0.277155	0.00295359
CAMKK1	0.85872	0.00296055
ABCB6	-1.22245	0.00297429
RGS11	1.39441	0.00298755
GFPT2	1.57227	0.00300612
BSCL2	-1.19371	0.0030128
BIN1	1.92082	0.00301831
TG	1.20966	0.00302244
AQP2	1.20966	0.00302244
CISH	0.46407	0.00303084
MEIS3P1	1.03086	0.00303605
POMT2	-0.517189	0.00303649
SYNE1	-1.68792	0.0030385
WDR5B	0.647169	0.00304232
SUPT7L	-0.285748	0.0030435
PARP14	0.804333	0.00305761
PSME4	-0.523822	0.0030614
TMEM126A	0.664561	0.00308554
PCSK7	-0.695291	0.00308855
MGST3	-0.668863	0.00308884
IAH1	0.578229	0.00309582
MRPL41	-0.741091	0.00311164
TRIM62	-0.526683	0.00311266
SLC25A20	-0.733145	0.00311818
VPS41	0.353926	0.00311875
KLC2	-0.777854	0.00312055
DALRD3	-0.51617	0.00312822
PEX6	-0.564077	0.00313203
DMWD	0.448187	0.00315256
ELAVL2	-1.80288	0.00315557
NOD2	1.31396	0.00315648
EIF2AK2	0.2336	0.00317286
RNF215	0.412497	0.00319286
LRRC46	-1.07978	0.00319571
ALDH2	2.55275	0.00320564
TPRG1L	-0.846052	0.00320852
TGOLN2	0.254982	0.00320927
RHPN1	-0.748363	0.00321131
PIAS2	0.475097	0.00321195
ANKK1	-2.34999	0.0032126
MAGI3	-0.930953	0.00322928
FBXO41	0.334699	0.00323301
MRC2	1.40359	0.00324968
LMO1	3.17323	0.00326089
KRTCAP2	-0.308237	0.00326521
NAALADL2	-2.52781	0.0032697
CDC42EP1	1.24575	0.00327159
NHSL2	1.67855	0.00329933
LRFN2	-1.15679	0.0033045
PSMC5	-0.305121	0.00330713
OSBPL1A	-1.06865	0.00331599
KIF2A	0.511066	0.00332788
DCTN2	-0.333356	0.00332933
ATP6V0D2	3.31491	0.00333261
ALDH3B2	-1.33658	0.00334244
BAIAP3	1.589	0.00338887
PIP5K1B	-0.172873	0.00338939
HEATR4	1.44755	0.00339255
GGN	1.43908	0.003395
TEX261	-0.256572	0.0034021
PIK3CB	0.458655	0.00340985
LYN	1.78957	0.00341207
VASH1	1.76672	0.00342413
FLT4	0.882863	0.00342704
SLC27A4	-0.650863	0.00342863
PPFIA1	0.845984	0.00344062
STAT6	-0.828572	0.00344313
ARNT	0.481229	0.003448
ALG3	-0.457559	0.00346153
TLE1	-0.709443	0.00346208
GRIN3B	1.87594	0.0034712
NTRK2	1.26225	0.00347418
ARL6IP5	-0.549391	0.00348832
TDRD3	0.513792	0.00349563
KTI12	-0.452258	0.00349642
AQP11	-0.605836	0.00349753
CAPNS1	-0.565349	0.00351473
MICB	-2.30236	0.00351529
TP63	2.45926	0.00352212
ATXN7L1	-0.332012	0.00352871
FLII	-0.425412	0.00354066
SDSL	-0.736775	0.00355162
COX10	0.645763	0.0035573
PRTFDC1	2.18659	0.00355767
DCAF16	0.628816	0.00356723
OAF	1.35757	0.00357547
FBXO3	0.550358	0.00357708
FAM114A1	0.684411	0.00359831
C11orf42	1.2114	0.00362187
RTP4	1.2114	0.00362187
FCGR2A	1.2114	0.00362187
VPS53	-0.212923	0.00363681
ETS2	0.984282	0.00363963
CDH11	1.8891	0.00364644
GMPPB	-1.38079	0.00364678
CA8	-3.18584	0.00365826
RABGAP1	0.658677	0.00365847
ZBED4	0.39336	0.00366667
TTC12	-0.841168	0.00367663
KIAA0100	-0.317437	0.00368691
FGFBP3	-0.729739	0.00369211
WDR59	0.462848	0.00369503
EPHX4	-0.6496	0.00369861
CLDND1	0.739997	0.00372911
ARVCF	-0.303542	0.00373529
SYT17	1.3491	0.00374685
C1orf122	-0.942043	0.00375447
PAH	2.10039	0.00375639
HSP90AB1	-0.842482	0.00375758
ATP9B	-0.342416	0.00376095
IQCK	0.517684	0.00376455
NEK9	0.823332	0.00376838
SNORA26	-1.21366	0.00376838
CYP4Z2P	-1.21366	0.00376838
RNF133	-1.21366	0.00376838
PKD1L1	-1.21366	0.00376838
DNAH12	-1.21366	0.00376838
TSPAN4	-0.54089	0.00376869
MSL2	0.757756	0.0037734
TMEM203	-0.546657	0.00377777
MAP3K14	0.974505	0.00378055
AEBP2	0.54142	0.00378519
ACMSD	2.48341	0.00379278
KIF13A	-0.523664	0.00379597
RANGAP1	-0.49864	0.00379646
RNF112	2.42149	0.00379916
ZNF702P	-2.09158	0.00379938
NPEPL1	0.739265	0.00382058
GNA12	-0.62065	0.00382662
MED7	0.686641	0.00383818
SHISA9	-1.29875	0.00385061
THG1L	0.826875	0.00386632
MRPS27	0.566313	0.00387731
RPS6KA3	0.650064	0.00388529
BRF1	-0.335867	0.00388774
OSTM1	-0.882253	0.00389047
ARHGDIG	1.03022	0.00389421
CITED1	-4.37428	0.00389986
PYROXD2	1.09447	0.0039184
COL6A2	2.94615	0.00392324
FZD8	-2.13019	0.00392663
GLI2	2.57853	0.00393887
KRTAP5-10	2.31847	0.00394716
IQCH	1.04733	0.00394858
NR2F1	-4.64461	0.00395164
MBD5	0.534231	0.00395353
RAB22A	-0.226527	0.00395651
XPA	0.8576	0.00396156
CORO6	1.99368	0.00396324
ABLIM3	1.94672	0.00396395
FOXA1	-0.365866	0.00396396
GTF2A1	-0.571405	0.00398158
YIPF1	-0.504153	0.00398236
NEU4	1.21237	0.00398372
TAS2R13	1.21237	0.00398372
ATP12A	1.21237	0.00398372
SNORA12	1.21237	0.00398372
ALG1L2	1.21237	0.00398372
ARHGEF5	0.733491	0.00400051
RGPD6	-0.371486	0.00400735
UPK3B	1.35934	0.00401646
TTC8	-0.394321	0.00402574
TRIT1	0.708696	0.00403443
EDARADD	-1.38115	0.00404591
NOL3	-0.878898	0.00404988
RIMBP3	-1.0549	0.00405372
TNRC6B	-0.247608	0.00405513
MIER3	0.329681	0.00405679
DDX49	-0.31842	0.00407658
PPFIA3	-0.994586	0.00407846
MYOZ2	2.45849	0.00408846
FAM172A	0.53385	0.00409447
CCDC115	-0.36019	0.00409668
RBM43	0.840283	0.00411145
ACADS	1.25178	0.00411815
ACAP3	-1.01797	0.00413355
RASA1	0.258267	0.00413622
RBM28	0.324935	0.00414169
ZNF391	1.42238	0.00415337
CXADR	-1.50217	0.00416115
NFYB	0.674402	0.00416468
GNB1	-0.135326	0.00416886
LRRC3	1.11186	0.00419379
BACH2	1.56354	0.00420312
EML1	0.379439	0.00421051
CECR2	2.26552	0.00421142
AKT1	-0.495003	0.00421758
FUCA2	-0.949253	0.00422302
DYNC1H1	-0.524874	0.00424402
ZDHHC1	1.6816	0.00424588
KIF7	-1.12878	0.00424994
TOMM40L	-0.782585	0.00425358
PARP11	1.08828	0.00426832
FAM131A	-3.86772	0.00427204
PDE12	-0.52024	0.00428075
EPCAM	-0.241581	0.0042997
TNPO3	0.446004	0.004317
PCLO	-3.04894	0.00433087
SLC25A29	-0.652739	0.0043403
DHRS1	-0.555026	0.0043449
LRRC49	-0.885529	0.00435088
CCDC82	0.767297	0.00435307
FABP6	2.9049	0.00435654
NPR2	-0.787978	0.0043686
ZNF383	0.434062	0.00437926
CC2D1A	0.421895	0.00438097
RANBP9	-0.241581	0.00438304
UBE2R2	0.546269	0.00438331
SPCS1	-0.580392	0.00439147
VWF	1.70512	0.00440463
MTCH1	-0.256372	0.0044177
SPDYE3	-0.799577	0.00442195
SARDH	2.0571	0.00442757
C17orf100	0.815727	0.00442843
ACOT1	-1.3541	0.00443669
EXOC4	0.616779	0.00448007
RAP1GAP2	0.650543	0.00448637
IFITM1	1.82296	0.00450551
KLC3	1.61671	0.00450784
HAR1B	-1.71773	0.00451367
ADCK2	0.2514	0.0045158
NISCH	-0.371585	0.00452025
ABHD6	-1.32494	0.00452461
CELF3	2.16196	0.00452818
MYL5	-0.416946	0.00453119
RAB32	-1.72048	0.00454073
TUB	1.98154	0.00454206
CBX6	-0.987383	0.00455263
ATP6V1H	-0.647518	0.0045928
EFR3B	-0.625423	0.00459522
SLC36A1	-0.57624	0.00459612
PPFIA4	1.56155	0.00459679
FKBP9	0.518037	0.00460905
CSNK1G3	0.507543	0.00461287
PTPN23	-0.564875	0.0046133
ZFPM2	-1.84084	0.00462722
HECTD3	-0.840596	0.00463013
AGXT	3.97807	0.00463079
NKIRAS1	-0.560247	0.0046323
FBL	0.615086	0.00464136
CLSTN3	1.91183	0.00465324
DDX17	0.364895	0.00466083
MACROD1	0.743095	0.00466739
DBI	-0.717543	0.00467092
MRPL55	-0.242059	0.00468613
GABRG2	2.16505	0.00469053
COMMD10	0.858395	0.00469325
PIAS1	0.477439	0.00469597
RUNDC1	-0.381934	0.00470542
BOD1	0.732485	0.00472329
DTNBP1	-0.589619	0.0047295
DTX4	0.674915	0.00474139
TMEM115	-0.585763	0.00474606
MAP2K5	1.1034	0.00474644
LCTL	-1.83002	0.00476072
PJA2	0.355866	0.00476517
FGD2	2.85583	0.00477837
SLC2A8	-0.315201	0.00478159
RIMS2	-1.59122	0.00478573
TTC32	0.591114	0.00478654
MEF2A	0.542097	0.00479167
C6orf52	-1.38773	0.00480238
ZGPAT	-0.477593	0.00480369
ABL2	0.657039	0.00480844
EXTL2	-0.605571	0.00480923
TP53I3	-1.04857	0.00481322
ACTN4	0.489954	0.0048183
PPDPF	-0.592385	0.00482783
MLXIPL	1.36403	0.00483226
FBXO38	0.590309	0.00484469
RAB4A	0.808669	0.00486011
EPM2AIP1	-0.41021	0.00486175
WDR53	-0.291685	0.00486322
PTP4A3	1.07707	0.00487217
ZNF710	1.37596	0.00487472
FHL2	2.04518	0.0048828
MPDZ	0.347684	0.00489517
PER3	0.912086	0.00490452
NGLY1	-0.456521	0.00491168
CSNK1D	0.278254	0.00492231
TJP1	0.440404	0.00492865
CNKSR1	-0.385641	0.00494591
TPRN	-0.545041	0.00494705
SFMBT1	-0.74003	0.00495583
STK36	-0.540566	0.00495691
TNFRSF19	-2.77375	0.00496421
ENPP1	-0.887566	0.00498045
SLC17A9	0.726498	0.00499645
TMEM232	0.726498	0.00499645
NRF1	0.48893	0.0049982
LTBP4	0.830353	0.00500263
CAMKK2	0.277209	0.00500804
KIAA0232	0.568323	0.0050337
MTG1	-0.561256	0.0050454
ETNK2	0.648539	0.00504859
TFR2	-1.35963	0.0050515
LRRC32	1.83981	0.00505926
GBP2	-1.58394	0.00506479
CNTNAP1	-1.03419	0.00506797
GCOM1	2.66252	0.00509746
SGCE	1.64272	0.00510119
WWTR1	0.697886	0.00510897
EFNB3	1.75754	0.00511704
AMN1	0.872836	0.00514937
HHIPL1	1.64238	0.0051523
LMF2	-0.563528	0.00515374
RBPMS	0.751668	0.00515664
STX10	0.505917	0.00515741
PCDHA13	-0.929462	0.0051649
IKZF5	0.315137	0.00516715
PAPLN	1.07429	0.00519077
POC1B	0.462896	0.00519174
C9orf78	-0.467552	0.00519858
SYTL4	-1.20399	0.00520284
WASL	0.868018	0.00521098
SRRM3	1.11045	0.00521472
LMAN1	0.506031	0.00522093
REL	0.950833	0.0052304
ITGA10	-2.67828	0.00523458
SMARCA1	2.97132	0.00524396
PGF	2.68024	0.00524948
MAP3K10	0.676833	0.00525003
SNHG9	-1.02953	0.00525316
SPSB1	1.05876	0.00525456
CAMSAP1	0.297729	0.00526555
ALKBH2	0.336857	0.00526907
EIF3D	0.457622	0.00527797
NRK	-3.05241	0.00527926
TET2	0.980254	0.00528171
SMAD4	0.811195	0.00528406
LOC728392	3.66445	0.00529661
FAIM2	2.04994	0.00530487
CASKIN1	0.606704	0.00530505
TMTC2	-0.821616	0.00530592
C11orf49	0.741324	0.00532389
PAK1	1.44611	0.0053251
MUTYH	-0.823869	0.00532822
GHDC	1.15537	0.00532977
TMEM209	0.863127	0.00533962
JRKL	1.06378	0.00534918
GBA	-0.804622	0.00534963
IK	0.443221	0.00535831
GPATCH3	-0.438829	0.00536329
GORASP1	-0.408493	0.00538185
DSTN	-0.353647	0.00539087
C12orf56	1.53614	0.00540716
FHOD3	1.07507	0.00542996
CTNNA1	0.439538	0.00543368
TTC19	0.659474	0.00544339
C3orf33	0.775117	0.00544433
HSF1	-0.300912	0.00544455
GNRHR2	-0.49255	0.00545136
PCDHAC1	-1.35164	0.00545637
MAML2	4.20028	0.00546556
MTRF1L	-0.355186	0.00547699
LGALS2	1.5449	0.00550221
LANCL1	0.810828	0.0055029
NPAS3	-1.20458	0.00550502
HEG1	1.39376	0.00551582
ACAD10	0.669827	0.00551646
RNF144A	1.05791	0.00551682
PEA15	-0.332161	0.00552112
TMEM151B	-1.54738	0.00552501
UQCRC2	0.670882	0.00552768
NME6	-0.586031	0.00553231
RPP38	0.307315	0.00553243
ZNF713	0.855596	0.0055402
FAM78A	1.22313	0.00555897
CNOT1	0.58811	0.00557215
HOMER3	1.08549	0.00557429
PKN3	1.4755	0.00557841
SCAMP1	0.672186	0.00557925
DIRAS1	1.32691	0.00558527
RRAGA	-0.447693	0.0055898
LEMD1	2.97958	0.00559962
GSTM4	1.03388	0.00560629
ZNF174	-0.216805	0.00560845
BANP	-0.361658	0.00560952
MMP17	0.542702	0.00563765
COL6A1	1.92588	0.00564614
PLCD4	-1.06985	0.00565472
GLG1	-0.252013	0.00565682
TSPAN33	1.18781	0.00567678
TTC28	1.53806	0.00568276
FAHD2B	0.832033	0.00568788
SLC47A2	2.63523	0.00568808
MRI1	0.247189	0.00569757
TPM2	1.71122	0.0057003
PIGT	-0.454902	0.00570277
NUDT19	0.470265	0.00570356
TRADD	-0.588367	0.00571574
RBM45	-0.279239	0.0057182
CXCL12	-2.28346	0.00571855
GATA2	0.826329	0.00572874
DUS1L	-0.270846	0.00574023
FEM1C	0.417618	0.0057467
DYNC2H1	-1.15908	0.00575411
STX8	0.690505	0.00575995
CHMP2A	0.827735	0.00576018
LITAF	0.204323	0.00576826
RCBTB2	-1.72958	0.00577664
SDHA	0.56835	0.00579423
HEBP2	-0.411769	0.00579857
PRKAG1	0.336991	0.00579894
CD82	1.31545	0.00580541
CLPTM1L	-0.454751	0.00581929
S100A16	-0.66669	0.00582974
TNFAIP8	1.1739	0.00583217
BRMS1	-0.457672	0.00584861
GET4	-0.427154	0.00584892
PRKAR2B	-1.00187	0.00585356
HPCAL1	-0.439631	0.00587127
LDB3	2.00987	0.00588141
FBXW11	0.383948	0.00589078
CD302	0.776451	0.00590508
ZBTB26	0.594279	0.00590597
ORM1	1.54577	0.00590636
SMAP2	-0.540161	0.00590762
SAMD4A	-1.08698	0.00590848
SYT3	1.26449	0.00591711
ANXA7	-0.3009	0.00592614
EXOSC5	0.453492	0.0059574
TMED8	-0.356303	0.00596325
MBD3	-0.43334	0.00596699
PEBP4	2.07194	0.00597012
APEH	-0.576506	0.0059707
RAB6C	-0.606523	0.00597926
PAPPA	-1.54809	0.00599746
FGF7	-1.54809	0.00599746
NAALAD2	-2.42827	0.00600624
DLX3	1.6775	0.00600968
SGK3	-1.17162	0.00602475
MECP2	0.430154	0.00603094
TMPRSS3	0.869182	0.00604686
SEC61A2	-1.04888	0.00605161
RASSF8	-0.530069	0.00606958
ADRA2C	0.804029	0.00607107
ABCA7	-0.794752	0.00607695
BTBD6	-0.682053	0.00607791
KLK10	3.86105	0.00607839
SCNN1G	3.1898	0.0060846
PFKL	-0.163162	0.00609399
B3GNT5	1.72716	0.00610892
PRDX1	-0.809247	0.00612531
FBXO30	-0.527656	0.00612648
ARHGEF35	0.509885	0.00613068
MGST1	-0.546756	0.00613207
LAMB2	-0.64097	0.00614168
ERCC5	0.201589	0.00614511
SYNRG	-0.259172	0.00615
GALNT6	-1.1184	0.00615529
IL2RB	-1.82881	0.00616287
CSRNP1	-0.451283	0.0061638
CORO1B	-0.582674	0.00617083
CYBA	3.09865	0.00618658
CMTM7	2.39426	0.00618706
FLNB	-0.264471	0.00619071
RAB43	-0.525797	0.0062158
DHX32	0.559215	0.00622603
NET1	1.24656	0.00624082
PAWR	0.637165	0.00624141
RASSF1	-0.710127	0.00624721
DIO3	2.8274	0.00626225
DACH1	-1.54894	0.0062642
CYP24A1	4.50911	0.00626847
MRPL45	0.484055	0.00627435
CIB3	1.7207	0.0062884
SCUBE1	2.74794	0.00629395
LCP2	2.28708	0.00631651
SLC35B1	-0.552162	0.00632314
SLC16A2	-2.15499	0.00632592
SLC23A2	0.44044	0.00633265
CD2BP2	-0.298555	0.00633788
LGALS9	1.88741	0.00636061
ZNF469	2.77466	0.00637707
PFKFB3	1.65024	0.00638018
RFX5	0.96646	0.00638029
ALCAM	-1.74798	0.00639452
FBXO17	0.970979	0.00639483
PCDHAC2	-0.931173	0.00639573
PKP4	0.589777	0.00639894
HTR6	1.69767	0.0064071
TTYH3	0.57397	0.00640934
CDC42EP3	1.88949	0.00641213
SEMA4B	0.981453	0.00641491
DDIT4L	-2.7501	0.00642272
ITPRIPL2	1.247	0.00643241
HRAS	-0.626274	0.00643431
RGS12	0.573863	0.00643479
CLCC1	-0.489129	0.00643998
RCN1	1.5496	0.00649145
SNX2	0.267351	0.00649167
TMTC1	-2.49174	0.00649508
CCRL2	-1.92613	0.00650141
FXN	-0.586727	0.00650557
ZNRF1	0.805511	0.00650868
SLC35F3	1.54849	0.00651355
MAPRE2	-1.92477	0.00652639
SNORD17	-1.35668	0.00655246
ELMOD2	0.479533	0.00655659
CHORDC1	-0.766173	0.00656369
ZBTB25	-0.411667	0.00656401
SUSD1	-0.475179	0.00657185
MARK4	0.762945	0.00658416
SMARCA4	0.273911	0.00659312
ZNF398	0.334426	0.00663834
PDE1A	-2.22111	0.00665368
NUDT17	0.823586	0.00666098
LETMD1	0.826926	0.00667411
DMPK	0.693403	0.00668033
SLAIN1	1.68294	0.00668132
DHCR7	-0.61878	0.00668906
SLC38A10	-0.344127	0.00669061
B4GALT5	0.797375	0.00669206
DDHD2	0.444398	0.0066933
RNF157	1.39666	0.00670389
ANO9	0.79699	0.00672937
SMTNL2	1.78357	0.00673481
ECSIT	0.729801	0.00673582
RUNX1T1	1.44225	0.00673793
CNOT6L	0.703126	0.0067459
PCDH10	2.21875	0.00674917
NDUFA5	0.42817	0.00675097
PRSS33	1.54897	0.00675565
CYP2C8	1.54897	0.00675565
CNTNAP2	-2.05819	0.00675797
C7orf50	-0.486934	0.00676218
KLF6	-1.24527	0.00676759
ASMTL	0.387949	0.0067723
CCNB1IP1	0.981158	0.00678821
NMT1	-0.351662	0.00679873
PCCA	0.522495	0.00682311
SCN11A	-2.5956	0.00683723
C18orf25	0.509138	0.00684677
SLC25A37	0.510499	0.0068539
HEMK1	-0.511174	0.00686171
SNX11	-0.28119	0.00688057
ADAMTS13	1.01188	0.00688758
CLEC11A	-0.640478	0.00688803
PTPN22	-0.765346	0.00689782
C17orf58	-0.825918	0.00689974
ARTN	-0.84591	0.00690302
PTPRN2	1.48386	0.00690858
GJD3	-0.486077	0.0069088
ARG2	-2.25839	0.0069121
MKRN1	0.694995	0.00691524
WNT3	0.605838	0.00693041
PFKFB4	-0.8276	0.00697008
OR2B6	-2.91779	0.00697247
HSPBAP1	0.364897	0.00697263
TEF	0.694283	0.00699077
GPS1	-0.512253	0.00703682
SORCS2	2.69259	0.00704133
ARHGEF17	0.764264	0.0070631
CLNS1A	0.516778	0.00707571
EIF6	-0.458321	0.00708282
ZNF248	0.299303	0.00709993
ELOVL1	-0.614063	0.00710494
ASL	-0.620712	0.00710591
ZFP36L2	1.21225	0.00710625
NDP	1.68879	0.00713365
TAF4B	0.72055	0.00713423
PDZD4	1.52542	0.00713431
ZCCHC9	0.38123	0.00714776
DAAM2	-1.69055	0.00716819
PLK2	-1.07022	0.00717711
EFNB2	-1.40735	0.0071833
RSL24D1	1.17769	0.00718833
NQO2	-0.944337	0.00719283
ZNF687	0.342782	0.00721673
GDPD5	1.58679	0.00722586
WDR11	0.271889	0.00722852
FAM169A	0.394601	0.00723751
H19	3.31399	0.0072521
RNF5	0.339631	0.00725806
DDX60	-3.66723	0.00727288
GAS5	1.075	0.00730387
SYPL2	-1.75442	0.00732855
BNIP3	0.516111	0.00734453
RGS9	1.45595	0.00738245
AKAP8L	0.434385	0.00738784
TNNC2	1.17203	0.00739257
SCUBE2	-1.15654	0.00740076
HEY1	-1.03067	0.007409
CHST8	1.31797	0.00741895
GCGR	2.21032	0.00742171
LRP1	1.76029	0.00743262
ALDH5A1	0.410189	0.00743345
FXYD6	2.35542	0.00743758
CBR3	-0.629789	0.00747706
RYK	0.750137	0.00748397
MYNN	0.613326	0.00748451
TCF7L1	1.86772	0.00748552
COX15	-0.186874	0.00751794
CDH24	-0.443187	0.00753131
SLC25A16	-0.3433	0.00755843
SMARCA2	-0.678461	0.00756668
NDST2	0.229468	0.00756695
MKLN1	0.377798	0.00758305
PGRMC1	-0.321721	0.00758434
ERCC2	0.40695	0.00758553
AFMID	0.340194	0.00760896
SCPEP1	-1.14263	0.00761463
CHMP4A	-0.687267	0.00761658
OPHN1	-0.509185	0.00761902
RDX	2.1846	0.00762614
NEURL1B	1.24041	0.0076285
NFE2L1	-0.410707	0.0076344
TMLHE	0.466323	0.00764312
NLGN2	0.866899	0.00764935
RAPGEF5	-0.441873	0.00766407
SORCS1	-3.90549	0.00767783
CCS	0.450833	0.00767995
THTPA	-0.500404	0.00768438
RCAN3	0.931788	0.00769587
SERINC4	0.729347	0.00771366
PSMC1	-0.637838	0.0077258
DDX19A	-0.452536	0.00773208
PPP2R5C	0.328513	0.0077509
BCL9	1.03055	0.00775775
CATSPER2P1	1.51811	0.00776046
SBF2	1.36318	0.00776352
EPHA2	0.655619	0.00776484
B3GNT7	2.25347	0.00776529
ADAL	0.486548	0.00777068
UBASH3B	-1.87292	0.00777119
GPR160	0.607016	0.00777967
PCDHB3	-0.69544	0.00778209
TOP1MT	0.53188	0.00778596
SPG11	0.482399	0.00778899
UNC119	0.569014	0.00780741
TP53	0.588595	0.007811
RASAL3	1.7874	0.00781881
CGN	-0.582704	0.00782105
TXLNA	-0.395916	0.00782509
SLC35B3	-0.512138	0.00783178
ZFP62	0.509593	0.00786058
MPPED1	1.68099	0.00786972
TMEM163	1.6857	0.00787085
ANAPC5	-0.284876	0.00787437
LATS2	0.508053	0.00788053
CRTC1	0.883766	0.00789015
SLC7A8	1.94067	0.00789346
TMEM51	0.872578	0.00791149
ZNF254	0.51736	0.00791569
FAM53B	0.439234	0.00793131
KLHL7	-0.656682	0.00793486
ZMPSTE24	-0.507009	0.00795143
PCK1	1.68824	0.00796889
RHOBTB2	0.828675	0.00797048
MGMT	0.511257	0.00797129
H6PD	0.671324	0.00797378
JARID2	1.02923	0.00797743
HSPH1	-1.18808	0.00799231
TGFA	-0.686254	0.00800376
RPL23AP64	-1.10823	0.00800946
ZNF236	0.334745	0.00801232
SOX3	-1.24019	0.00801353
RCOR2	1.12416	0.0080235
DNER	-2.17169	0.0080269
PCMT1	-0.796184	0.00804124
UBE3A	0.248173	0.00805039
TRPC1	0.393433	0.00806312
TMED6	-1.10047	0.0080641
ADCY6	-0.590649	0.00807675
PLIN1	2.42407	0.00807966
GPAA1	-0.63945	0.0081143
DHDDS	-0.355621	0.00812025
KREMEN1	0.657575	0.00812674
IL1R1	-1.61236	0.00812784
ZCRB1	0.458085	0.0081319
PTGR2	0.172394	0.00813474
AMBRA1	0.276206	0.00814011
GPR39	-0.431218	0.00814229
IFI27L2	1.00832	0.00814334
RPS6KB1	0.455014	0.00814851
CYP1B1	-0.793976	0.0081546
N4BP1	0.244359	0.00815636
SEC22C	-0.599066	0.00815659
DHX16	-0.376213	0.00817371
MLLT11	-0.924092	0.00818105
SLC26A6	-0.942094	0.00818247
LSS	-0.801765	0.00818827
TRPV4	1.06216	0.00820886
ATP13A3	0.253259	0.00824692
IRAK1BP1	0.746051	0.00824956
GFM1	-0.312579	0.0082621
GPS2	-0.396249	0.00826766
TCTA	-0.914349	0.00827133
CLPX	0.422025	0.00830596
SIX2	1.10371	0.00831566
ATG12	0.49235	0.00832483
AMMECR1	-0.367398	0.00833254
KLK7	4.69496	0.00833379
PTK7	0.686025	0.00834461
SLC15A3	-1.42099	0.00836382
RGMB	0.47469	0.00836915
PITRM1	-0.359295	0.00837997
MPZL1	-0.515059	0.00840085
SGK1	1.32935	0.00840354
TKTL2	1.87603	0.00840973
RPS6KA4	-0.45443	0.00841643
NDOR1	-0.899004	0.00843356
PCOTH	-2.04889	0.00843604
FAM171A1	1.94081	0.00843792
LMO3	-2.75308	0.00846073
PADI3	3.07859	0.00846207
CDAN1	0.446498	0.00847513
RSBN1L	0.337103	0.0084902
SPEN	0.486428	0.00849606
UGCG	1.05771	0.00850851
CASP8	-0.832219	0.00852529
ZNF417	-0.244179	0.00852831
B4GALNT2	0.754561	0.0085324
GATA5	2.015	0.00853274
DCXR	-0.835076	0.00854176
B3GALNT1	-0.65731	0.00854631
GFI1	0.908312	0.00855067
ARPC2	-0.360914	0.00855082
LNPEP	0.398873	0.00855897
IP6K1	-0.484472	0.00857036
ANKHD1	0.594956	0.00857111
ICA1	-0.429189	0.00857165
KCNF1	1.79122	0.00858366
SALL2	1.78453	0.00858542
NUDCD2	0.407843	0.00859943
ZNF260	0.586168	0.00862057
USP43	0.581372	0.00865031
USP8	0.514181	0.00866128
CHDH	-0.570446	0.00866895
IRX2	0.842879	0.00867482
FTO	-0.220839	0.00869076
FAM177A1	-0.354743	0.00870214
NKX3-1	-0.346506	0.00870287
ZNF330	0.154059	0.00870449
SSNA1	-0.370835	0.00872905
NDUFAF3	-0.707824	0.0087317
RPAP2	-0.221058	0.00873572
QSOX1	-0.955208	0.00873618
FDX1	0.621397	0.00873987
FAM25A	1.26419	0.00874024
ZFP91	0.239034	0.00874774
RHOA	-0.430709	0.00875141
COQ4	-0.52504	0.00875999
NFU1	0.837455	0.00877757
DCAF6	0.427153	0.00877763
ESYT1	-0.6629	0.00878563
PRKG1	-1.52519	0.00880079
PCDHB2	-0.553515	0.00881025
RIMS4	1.32642	0.00883409
CAV1	3.72312	0.00887175
SPRYD4	-0.494902	0.00888131
DPYSL2	-0.95312	0.00890158
KCNK13	-2.26255	0.0089052
MITD1	0.342255	0.00890603
PIGG	-0.432405	0.00891763
AKNAD1	-1.52644	0.0089504
SLCO4C1	-2.84162	0.0089593
HGFAC	1.96041	0.00896487
DLG5	0.427985	0.00896898
ZBTB44	0.428127	0.00897094
BTN2A1	-0.280931	0.00897277
ZNF438	0.734424	0.00897571
EFEMP2	1.33127	0.00898089
FRY	-1.54153	0.0089855
MME	3.15625	0.00899317
MICA	-1.0393	0.00899597
FXYD5	-1.13095	0.0090133
ESRP1	0.413715	0.00901448
HDAC7	0.542444	0.00902119
CCPG1	0.992373	0.00902333
ACOT13	-0.279619	0.00902722
DYNC2LI1	0.383535	0.00902746
IFNAR1	-0.363057	0.00903142
SNX18	0.71176	0.00904509
RNF13	0.520616	0.00906245
ABCD3	-0.949027	0.00908439
ZNF823	-0.471519	0.00913092
RYR1	1.49283	0.00914552
TMEM161B	0.678494	0.00915075
AGBL5	0.52554	0.0091688
EPM2A	-0.843638	0.00920676
REPS1	-0.580046	0.0092244
CDKN1C	2.51059	0.00922802
IGSF3	-0.593085	0.00922958
ZNF786	0.265893	0.0092381
PTGR1	-0.925903	0.00925413
ARHGEF10L	0.94371	0.00929314
DDX24	-0.391623	0.00932282
PVALB	-2.24332	0.0093292
GUSB	0.0852519	0.00936936
SMUG1	-0.236484	0.00938675
CITED4	1.07462	0.0094097
LRRC4	0.950742	0.00941404
NUMBL	0.749428	0.00942298
WWOX	1.17696	0.009425
TDRKH	0.665576	0.00945804
CHCHD6	0.925422	0.00947596
LAMP2	-0.435524	0.00948
ACY1	-0.67559	0.00949002
OAS3	-0.580437	0.00951565
HINT1	0.370826	0.0095277
LHX6	1.55716	0.00952969
GPRC5D	-1.67577	0.00955916
NOTCH4	-0.682895	0.00957066
EIF3L	0.653747	0.00957377
CCDC33	2.24422	0.00958866
C9orf106	1.67011	0.00959388
SLC12A8	0.8545	0.00962484
NOC4L	-0.421832	0.00964011
TMEM181	-0.310709	0.00966376
PLAGL1	-2.3509	0.0096775
FOXN1	2.76126	0.00970411
FAM53C	0.356298	0.00970448
ZC3HAV1L	0.627803	0.00970948
HTR7P1	-0.512843	0.00971442
CALML4	0.70182	0.00971625
ZG16B	-0.834547	0.00972006
AP1S2	-0.770059	0.00972448
MYRIP	-2.09757	0.00975076
ZNF644	0.618721	0.00976753
RBM27	0.448504	0.00977382
PIP4K2C	-0.716205	0.00978987
SMARCD3	1.43463	0.00979195
DHX29	0.23637	0.00980951
KCNG1	1.79055	0.00981637
SPAG1	-0.539524	0.00982222
SLC9A6	-0.890658	0.00982538
CA2	-0.701317	0.00982575
TRAF1	1.69095	0.00982732
PLEKHG5	0.621759	0.00984588
TMEM229B	0.637741	0.00985959
PCYT2	-1.16089	0.00985985
MTA1	0.353604	0.00986887
CCDC96	-0.886084	0.00989514
GPLD1	0.842386	0.00994592
COL13A1	1.72369	0.00994794
RIOK3	-0.506418	0.00996362
PPIP5K2	0.398758	0.00996851
TGFB1I1	1.08293	0.00998381
TBL1XR1	1.0911	0.0100391
RBPMS2	1.64406	0.0100602
ISYNA1	2.0703	0.010062
GANC	-0.356625	0.0100622
ARPP19	0.265775	0.0101353
RAD23A	0.207755	0.0101494
DEGS1	-0.523663	0.0101694
GPATCH4	-0.531859	0.010184
ATP6V0B	-0.73229	0.0102359
FAM168A	0.632426	0.0102387
BTD	-0.587105	0.010246
STX12	-0.390599	0.0102481
AIFM2	-0.684939	0.0102554
CXCR4	-2.43102	0.0102963
SLC25A36	0.630958	0.0103073
GPR161	2.78676	0.0103251
SMN1	0.355924	0.0103692
RHOT1	0.413042	0.0103774
CTHRC1	-1.08918	0.0103812
OLFM2	1.63546	0.0103839
POP5	-0.511057	0.010384
FAM133B	-0.211847	0.0103946
USP26	-1.25311	0.0104137
FADS3	0.484214	0.0104551
CYP27B1	-1.19738	0.0104582
RUFY2	0.174246	0.0104636
LOC100134368	0.731907	0.0104774
HMGCS1	-0.998865	0.0104996
NFKBIE	-0.64969	0.0105279
KLHL18	-0.33588	0.0105359
DUSP15	1.55376	0.0105375
GARNL3	0.965303	0.0105393
VPS18	-0.811748	0.0105463
EIF4B	0.691077	0.0105466
STYK1	-1.76247	0.0105521
BTAF1	0.562031	0.0105814
IQCE	0.368569	0.01059
CTDSPL2	0.579216	0.0105957
RGPD5	-1.2127	0.0106271
CTF1	2.51792	0.010637
RAI1	0.377449	0.010645
ANKRD16	0.356174	0.0106457
ANO3	1.30197	0.0106934
AP3B1	0.315703	0.0107163
SMPDL3B	-1.4567	0.0107285
MFSD9	0.488413	0.0107362
GPR156	1.59306	0.0107427
SLC16A7	-0.570353	0.0107448
ZFC3H1	0.542347	0.0107448
EPB41L4B	0.375446	0.0107518
C1orf216	-0.558912	0.0107538
GPR137	-0.716347	0.0107577
SCG5	3.61786	0.0107684
DYRK1B	2.15448	0.0108085
PUM2	0.286758	0.010845
HERC2P2	-0.647003	0.0108492
SLC39A6	0.634041	0.010876
COPS2	0.510011	0.0108845
FAM131C	1.98743	0.0108855
IDI1	-1.09476	0.0108871
MAP3K1	0.880034	0.0108955
ALS2	-0.473174	0.0108961
TRIM26	-0.250071	0.0109173
RPGRIP1	-1.21953	0.0109196
MIA3	-0.184999	0.0109312
RHOBTB1	1.03833	0.0109362
TEP1	-0.600169	0.0109407
TRAPPC6A	0.837557	0.0109503
SCFD1	-0.458308	0.0109644
STX4	-0.338665	0.0109744
UPK1A	0.569516	0.0110216
FBXO46	0.562526	0.011028
POLR1D	0.435573	0.0110406
GLTPD2	-0.554864	0.0110452
RPL39L	0.695667	0.0110515
SLC10A7	-0.933857	0.011056
ZNF552	-0.861855	0.0110799
ADI1	-0.405855	0.011098
RP2	-1.08592	0.0111036
PBX2	0.320049	0.0111135
PDE5A	0.744084	0.0111248
TBC1D25	0.547637	0.011132
PCMTD2	0.485754	0.0111358
RIPK1	-0.595067	0.0111479
CCNYL1	-0.732856	0.01116
PEMT	0.334156	0.0111677
ZFAND1	0.886494	0.0112005
POLRMT	0.292515	0.0112056
UBE2Q1	-0.242715	0.011213
DLC1	1.21555	0.0112336
ZNF557	-0.496663	0.0112459
DGKH	-1.10399	0.0112534
ALDH3A1	2.20909	0.0112622
RNF121	0.258718	0.0112687
ZNF146	0.403284	0.0112691
PRRT3	-0.773865	0.0112724
BEGAIN	1.26717	0.0113115
SNX4	0.342948	0.011323
WASF3	0.80826	0.0113356
JOSD1	-0.369327	0.0113716
TAF3	-0.326181	0.0113843
TUBA1A	-1.8245	0.0114112
KLF9	1.25442	0.0114213
ATF2	0.265418	0.0114304
LRRC28	0.558919	0.0114624
MBNL1	0.380693	0.01149
SSBP4	0.344474	0.0115076
BMI1	-0.566151	0.0115176
FER	0.549353	0.011547
BBS5	0.297415	0.0115506
PHF8	0.24364	0.0115549
APTX	-0.159287	0.0115582
LSM14A	0.582358	0.011576
RGS6	3.32192	0.0115945
SLCO3A1	0.573442	0.0116126
HIBADH	0.433357	0.0116373
SCNN1B	3.72805	0.0116517
RTN2	0.816438	0.0116722
LGALS8	0.908989	0.0116739
CBS	1.69631	0.0116961
SLC37A2	2.26961	0.0117109
GRPEL2	1.04094	0.0117176
FOXRED2	-0.604141	0.011725
GALNT7	-0.873019	0.0117253
PCNP	0.439659	0.0117313
PSMC4	-0.295753	0.0117584
MAP1LC3B2	2.41019	0.0117618
GPR179	2.22144	0.0117627
MSRB2	0.542119	0.01179
KLF13	0.992881	0.0118035
GBP1	1.76729	0.0118094
BNIP2	0.446549	0.0118238
SLC25A39	-0.402515	0.0118272
BCOR	0.446294	0.0118337
ARMC3	1.64954	0.0118454
TTL	-0.55613	0.0118646
TFG	0.310769	0.0119052
CRTC3	0.498171	0.0119119
KIF17	1.13206	0.0119421
PTGES2	-0.258841	0.0119479
LASP1	-0.911165	0.0119524
HSD17B6	-1.37295	0.0119915
RPRD2	0.278462	0.0120052
ESYT3	1.02111	0.012008
VTI1A	-0.437417	0.0120166
IQSEC1	0.324457	0.0120467
TOR3A	-0.367241	0.0120477
SCN4B	2.56299	0.0120752
TPBG	-0.655142	0.012085
HSP90AA1	-0.837049	0.012135
NACA	0.479724	0.0121438
TMEM123	0.659444	0.0121633
TNS4	1.14253	0.0121949
SHH	1.49276	0.0122011
YWHAH	-0.462319	0.0122088
MTMR7	0.452073	0.0122335
FBLN7	3.65743	0.0122483
NAP1L2	-1.20821	0.0123163
SLC22A17	0.960266	0.0123165
TMEM199	-0.54571	0.0123332
SLC2A1	-0.556616	0.0123773
CD320	-0.555173	0.0123878
NIPAL2	1.01044	0.0123892
DHX30	-0.597174	0.0123939
RNFT1	-1.12116	0.0124023
SNHG3	-0.411651	0.012404
GFOD1	-0.598236	0.0124111
CCNT1	0.438379	0.0124441
NRADDP	-1.54315	0.0124554
SLC4A1AP	-0.532914	0.0124795
DPH2	-0.481732	0.0124945
NFKB2	-0.263948	0.0124991
DYNC1LI1	-0.791307	0.0125005
GALNT14	-0.868268	0.0125294
LMBRD2	-0.328578	0.0125391
SLC4A3	1.69698	0.012545
TFAP2B	-1.9138	0.0125524
SLC25A45	-1.21531	0.0125777
MPND	0.573883	0.0125807
PDCD2L	0.719121	0.0125825
HP1BP3	0.166371	0.0126086
GXYLT2	-0.797173	0.0126112
PCGF3	0.239608	0.0126349
KLK14	1.27576	0.0126719
TPK1	-1.1114	0.0126882
C19orf73	-0.660198	0.0127141
ETFDH	0.506342	0.012721
E2F6	0.441107	0.0127298
TAOK1	0.233435	0.0127348
PADI2	1.68435	0.012739
WDR36	0.314404	0.0127469
AP1B1	-0.361274	0.0127763
MAGEC3	3.34524	0.0128008
NUDT3	0.557853	0.0128329
TMEM106C	-0.562671	0.0128516
RAD17	0.347736	0.0128681
MBP	-0.284281	0.0128903
ALOX5	2.51328	0.012924
TNFRSF14	-2.41553	0.0129286
CACNA1H	0.722256	0.0129306
MANF	-0.745665	0.0129337
CDH26	2.0509	0.0129464
EIF4EBP1	0.783759	0.0129625
FRMD5	-1.13227	0.0129687
CXXC1	-0.310091	0.0130063
GTF2I	0.609589	0.0130239
METRN	-0.657555	0.0130338
PCDHGA6	-0.987645	0.0130411
TMEM184A	-0.631495	0.0130436
DNAJA1	-0.956928	0.0130451
MESP1	1.89099	0.0130496
DEF8	-0.343716	0.013063
RBP5	1.33323	0.0130652
LARP1	0.448434	0.0130692
TEAD2	1.51974	0.0130708
TXN2	-0.174726	0.0130883
ZNF75D	0.568738	0.0131017
RRN3	0.425926	0.0131114
SLC39A2	-1.65715	0.0131165
CYP2J2	-0.917042	0.0131188
SLC41A3	0.752387	0.0131226
PCDH9	-2.10888	0.0131317
CNOT2	0.226299	0.013138
KISS1	1.27601	0.0131628
VPS39	0.588912	0.0131846
GADD45B	1.16213	0.0132064
GBP3	1.91686	0.0132121
EXOC1	0.186552	0.0132257
PSMD2	-0.572307	0.0132295
C1RL	1.65538	0.0132295
RGS20	-0.556057	0.0132668
HIGD2A	0.525257	0.0132775
SRM	-0.937536	0.0132963
PSMB8	1.12335	0.0133008
SLC9A2	-0.478976	0.0133049
DISP2	-0.972954	0.0133111
IRAK1	-0.222492	0.0133129
CCDC137	-0.381406	0.013325
ADAM18	-1.54572	0.0133259
ARMC2	0.760259	0.0133327
C19orf12	0.348019	0.0133418
NAGK	-0.653294	0.0133521
RPA2	-0.620376	0.0133574
KLC1	-0.424351	0.0133595
KCTD1	-0.425305	0.0133644
MAT2B	0.461971	0.0133758
ANK1	0.57005	0.0133782
ZNF761	0.3097	0.0133858
BMP4	-1.30792	0.0133933
ABCC1	0.636413	0.0134019
RRP9	-0.503425	0.0134091
SCRN2	0.837838	0.0134244
ZNF345	0.646037	0.0134328
PDZK1P1	-1.12625	0.0134621
ZMYND19	-0.573322	0.0134792
HM13	-0.466413	0.0134811
ROPN1B	1.75644	0.0134835
ANKRD30A	-5.01013	0.0134837
EPOR	1.06571	0.0134845
STARD13	-0.990867	0.01351
ZNF44	-0.33734	0.0135374
DDX47	0.268923	0.0135453
SLC29A4	0.94238	0.0135851
SOCS7	0.36405	0.0135864
MYO1C	-0.330674	0.0135865
APOL2	-0.69624	0.0135996
SYT6	1.65713	0.0136241
LRRC26	-0.977817	0.0136257
IREB2	0.256191	0.013649
EML2	1.03238	0.0136517
SULT1A3	-0.795027	0.0136563
FBXO34	0.383229	0.0136849
PRKAR1B	-1.17111	0.0137043
MKNK1	-0.285986	0.0137128
COMMD2	0.538359	0.0137191
TIRAP	-0.351241	0.0137424
PRDM5	0.915661	0.0137726
AVPI1	0.565301	0.0137784
LRRN2	1.41658	0.0137825
DNM1P35	2.00873	0.0138132
SLC27A3	-0.825029	0.013841
CBR4	0.548819	0.0138523
NOMO2	-0.450407	0.0138617
SLC5A3	0.535358	0.0138848
PRMT2	-0.327913	0.0138926
NCOA2	-0.617842	0.0139082
WDR48	-0.13942	0.0139263
ANGEL1	0.186856	0.0139441
SCRIB	-0.495357	0.0139506
KCTD13	0.407631	0.0139869
TBC1D9B	0.251387	0.0139992
NPR3	1.38647	0.0140007
CDH13	-1.54969	0.0140051
UBXN10	1.53998	0.0140246
ASCL1	3.42522	0.0140736
FBLN1	0.991221	0.0141281
SLC20A1	-0.537033	0.0141317
RAB27A	0.676668	0.0141331
BCS1L	-0.464784	0.0141382
SUCNR1	3.224	0.0141459
ZNF132	-0.685042	0.0141477
ATPAF2	0.401222	0.0141607
BEST2	-1.34937	0.0141616
IPO4	-0.520689	0.0141969
SLC12A2	-1.49082	0.0142077
UBXN7	0.45205	0.0142169
SYNGR2	-0.610218	0.0142217
MFSD6	1.50993	0.0142229
COMT	-0.660212	0.0142258
STK39	-0.435122	0.0142425
C12orf42	1.21026	0.0142595
HTR7	1.54258	0.0142636
LAMC3	2.9145	0.0142649
RPS6KB2	-0.290021	0.0142743
PCDHGA1	-1.31641	0.0142935
CAV2	2.6294	0.0143005
ATP6AP1	-0.603343	0.0143174
CREB3L2	0.594754	0.0143227
UTP23	0.289394	0.0143256
CENPP	-0.718837	0.014353
CSPP1	-0.663362	0.0143535
ANO1	0.856502	0.0143607
SLC2A4	0.692283	0.0143769
ZSCAN2	0.832596	0.0143774
AKNA	0.48198	0.0143806
TP53I11	0.623038	0.0143908
TMEM204	-1.65001	0.0144005
GPR176	0.501579	0.0144369
TATDN1	0.744299	0.0144753
RASL10B	1.05444	0.0144785
MAST2	-0.591996	0.0144929
DNALI1	2.28155	0.01453
NCK1	0.632387	0.0145456
PAK3	1.34806	0.0145466
AHSA1	-0.806975	0.0145516
FAHD1	-0.652161	0.0145656
FAM24B	1.03816	0.0145849
BRD1	0.436087	0.0145941
TMEM38A	1.38712	0.0145973
AQP6	2.27066	0.0146031
SLC27A5	0.677566	0.0146329
PAMR1	1.87922	0.0146497
PIK3R5	1.6491	0.014657
DNAL4	0.514089	0.0146575
PDIA5	0.559136	0.0146581
CADPS	1.11158	0.0146852
GCAT	-0.46528	0.0147152
GPR157	-0.393476	0.0147205
TJP3	0.540337	0.014737
AMIGO2	1.02296	0.0147883
TCN2	0.91543	0.0147911
TARBP2	-0.318346	0.0147937
COQ7	0.292004	0.0147941
MAP3K7	0.131947	0.0147972
MAN1A2	0.240582	0.0148181
HTR1E	2.77993	0.0148241
KDM5B	0.788073	0.0148609
PNKD	0.5471	0.0148726
MTPAP	0.204217	0.0149067
CRBN	0.32083	0.0149103
LYNX1	1.23207	0.0149422
NEK11	-0.807415	0.0149529
COL4A2	-1.1644	0.0149554
CYB5R3	-0.291262	0.0149877
DAPK1	1.55348	0.0150114
CABYR	-0.731189	0.0150192
POU2F3	1.01518	0.0150223
SNAP47	0.266999	0.0150292
GMEB2	0.187912	0.0150397
FADS2	0.661795	0.0150796
RBM44	1.09621	0.0150799
TMEM50B	-0.375996	0.0150882
LRRK1	1.56193	0.015093
CTSZ	-0.444887	0.0151065
SDF4	-0.388523	0.0151101
EPN3	-0.217884	0.0151121
B4GALT6	1.44319	0.0151492
PACRG	1.98743	0.0151927
SPIN1	0.290639	0.0152077
RPN2	-0.470366	0.0152369
CAPN12	1.69456	0.0153043
PAX9	1.01786	0.0153058
HNRNPA1	0.573658	0.0153167
PRLR	-0.200446	0.0153325
DDX28	-0.287312	0.0153411
ZNF784	0.442142	0.0153424
FBXL6	-0.681854	0.0153521
ELP2	0.716486	0.0153894
FCHO1	0.529062	0.0154222
HMGCLL1	-1.49253	0.0154356
DHX35	0.295311	0.0154503
TMEM9	0.592279	0.0154507
SUCLG2	0.600333	0.0154601
NOB1	0.524711	0.0154604
ASCL2	-0.375486	0.0154771
ALDH4A1	-0.778576	0.0154902
ZIC2	0.59263	0.015528
LIFR	-0.619908	0.0155398
RPP14	-0.547017	0.0155475
ANKS6	0.625996	0.0155544
SUSD3	2.47765	0.0155613
ENHO	-1.72916	0.0155645
RPPH1	-1.95471	0.0155724
MED13L	0.993821	0.0155807
NAP1L1	0.588457	0.015598
PPIP5K1	0.632811	0.015626
SERPINB9	-0.713131	0.0156784
COX6C	0.64184	0.0156787
GALNT4	-1.11211	0.015683
KLHL12	0.51411	0.0156918
SLC2A14	2.51504	0.0157138
KBTBD8	-1.67416	0.0157291
TGFB3	-1.59951	0.0157304
PYGL	1.80604	0.0157369
COG4	-0.439987	0.015738
EMP2	0.664532	0.0157443
UST	-1.70386	0.0157588
NME4	0.725158	0.0157593
IFITM3	0.923691	0.015784
SHF	1.1763	0.0157918
ABHD8	0.773554	0.0157934
UBTD2	0.403234	0.0158028
PAQR8	0.81445	0.0158164
SLC6A14	-1.21127	0.0158745
NGEF	1.65052	0.0158758
HIP1	0.840902	0.015877
PSENEN	-0.315274	0.0158789
CT62	-0.574742	0.0158793
DDX19B	0.48421	0.0159152
PRICKLE1	2.05076	0.0159227
PPIEL	-2.63937	0.0159977
ADAMTS9	-2.87189	0.0159993
STUB1	-0.466395	0.01604
SLC25A35	0.803213	0.0160695
UTRN	-0.826063	0.0160759
ASB2	1.35067	0.0160767
SLC26A4	1.35067	0.0160767
MAPK8	0.267038	0.0160866
MBOAT7	-0.663212	0.0161162
GPHN	-0.828855	0.0161188
KCTD11	0.683781	0.0161315
CDRT4	-3.11427	0.0161404
TFAP4	0.473621	0.0161531
OBSCN	0.91115	0.0162007
DRAM2	0.552008	0.0162138
TECR	0.323953	0.0162339
CCDC24	-0.891853	0.0162462
MANEAL	-0.877612	0.0162464
RPSA	-0.478941	0.0162477
VPS13A	0.371445	0.0162488
DHX36	0.256249	0.0162715
CCNO	-0.278733	0.0163178
SCMH1	0.969543	0.0163184
STON2	-0.870223	0.0163212
SMPD2	-0.543539	0.0163509
CPN2	1.34629	0.0163598
DDRGK1	-0.300079	0.0163688
SH3BGRL2	-0.746597	0.0163754
FEM1B	0.477803	0.0163776
P2RX2	2.81677	0.0163809
SELPLG	-0.811858	0.0163814
ZNF234	0.828868	0.0163895
FNDC4	1.75348	0.016393
DUSP28	-0.550618	0.016396
GGT6	0.777886	0.016401
FOXO1	0.690626	0.0164195
SH2D4B	-1.35323	0.0164215
WDR7	-0.59803	0.0164374
UNC93B1	-0.277426	0.0164445
PELI1	0.84789	0.0164446
SLC30A5	0.183378	0.0164466
APOOL	0.277724	0.016455
RAB40B	0.87012	0.0164604
OCRL	0.475523	0.0164874
SECISBP2	0.35254	0.0164907
MAN1B1	-0.377064	0.0165003
OXCT1	-1.00944	0.016517
KAT2B	-0.690304	0.0165181
CNPY3	-0.5073	0.0165277
RIN3	1.81224	0.0165565
ZNF75A	-0.667726	0.0165582
ISOC1	-0.652799	0.0165882
AP3S2	1.07696	0.0165915
ADAMTS15	2.96525	0.0165974
LY6D	2.20954	0.0166297
LOH12CR2	0.874182	0.0166335
BCAM	0.664521	0.0166507
IL6ST	-0.411647	0.016668
KIAA0319	-2.06737	0.0166724
SCML2	1.03255	0.0166771
HDAC3	0.243069	0.0166935
PHAX	0.114499	0.0167233
TMED7-TICAM2	1.13972	0.0167271
OPLAH	0.669995	0.0167279
RPL24	0.884703	0.0167652
DTX3L	0.802465	0.0167776
TARBP1	-0.361954	0.0167838
NOTCH1	0.992175	0.0168009
ESR2	-1.09315	0.0168113
IGBP1	0.835072	0.0168203
GBE1	-0.702575	0.0168283
SLC30A8	3.21427	0.0168407
NSF	-0.398085	0.0168452
PRDM16	1.01994	0.0168572
NRXN2	0.916239	0.0168579
TNFSF4	1.40976	0.0168717
SPEG	1.64477	0.0168852
KIAA1109	0.531597	0.0169056
LDLR	-0.617268	0.0169416
MGRN1	0.299799	0.016958
HAMP	1.35213	0.0169665
LARP4B	-0.308773	0.01698
ROCK1	-0.361957	0.0169819
IL20RA	1.61693	0.0170004
FLT1	1.47184	0.0170715
BRF2	-0.521366	0.0170772
BZW1	-0.838427	0.0171176
EEF2	0.639977	0.0171564
SIK3	0.327842	0.017175
C1R	2.11697	0.01718
UBE2L6	1.64052	0.017195
GJC3	-1.3966	0.0172031
LY6G5C	-0.882802	0.0172129
PURB	-0.387634	0.0172138
CCND3	-0.738262	0.0172301
VAC14	-0.176272	0.0172334
IFI27L1	0.496959	0.0172632
ZNF35	-0.587841	0.0172655
LRCH4	-0.459618	0.0172678
POLR3GL	0.569443	0.0173061
ZSCAN5A	0.738223	0.0173116
FTH1	-0.594812	0.0173124
MYLK3	1.17036	0.017335
AMPD1	1.67997	0.0173396
AUH	0.754097	0.0173712
RRM2	-0.765955	0.0173812
IKBKG	-0.346697	0.0173932
BDH1	-1.03211	0.0173934
RAPGEF6	0.418064	0.0173935
RAMP2	1.98907	0.0174195
LHX4	-0.753349	0.0174236
ABI2	0.431724	0.0174316
CNPY4	-1.2938	0.0174739
EHF	2.67414	0.017482
EPHA4	3.29101	0.017492
THAP4	0.344776	0.0175349
SLC26A10	1.31119	0.0175446
SNRK	-0.338726	0.0176211
IQCC	-0.491625	0.0176267
COPS5	-0.507308	0.0176326
TFDP2	0.827331	0.0176355
THRB	1.26016	0.0176498
KCTD20	-0.424235	0.0176624
AMZ1	-0.512598	0.0177061
LRP12	-0.425908	0.0177138
DNAJC3	0.334731	0.0177349
FKBP4	-0.952204	0.0177463
PRG4	2.85566	0.0177475
SEC24A	0.300245	0.0177577
EXT2	-0.189781	0.0177736
KIDINS220	-0.258154	0.0177824
KCNH6	0.68697	0.0177824
SPPL2A	-0.217658	0.0178116
TPSB2	2.20164	0.017817
BTF3	0.554699	0.0178453
AASS	0.582156	0.0178771
ATRNL1	2.12747	0.0178809
PIK3C2B	0.238682	0.0178845
RPL32P3	0.85222	0.017894
ZNF2	0.315194	0.0178957
KCNH3	2.142	0.0179142
ARHGEF10	0.493836	0.0179171
CXXC5	0.811969	0.0179407
DTWD1	0.642966	0.0179465
ETNK1	-0.437567	0.0179523
DDX41	0.239338	0.017956
ZNF813	0.592135	0.0179673
CAT	0.689905	0.0179832
CD63	-0.676862	0.0179874
TM9SF1	-0.254991	0.018024
MEX3A	0.670177	0.0180358
MRPL10	0.501881	0.0180497
FAM66C	1.43433	0.0180609
MXRA7	1.11812	0.0180681
SPDEF	-0.777406	0.0180828
ADORA2B	0.726367	0.0180839
PML	0.556462	0.0180926
RAB34	-1.21191	0.0181111
CTR9	-0.252039	0.018122
TESC	1.37269	0.0181298
ARHGDIA	-0.542894	0.018133
RHOB	-0.646861	0.0181446
POLD2	-0.235574	0.0181549
[truncated: 12,551 more rows]
