# Supplementary material for: In Silico Evaluation of Natural Compounds for an Acidic Extracellular Environment in Human Breast Cancer
Source: Cells. 2021 Oct 6;10(10):2673. doi: 10.3390/cells10102673 (PMC8534855; doi:10.3390/cells10102673)
Supplement: Supplementary file 1 [file cells-10-02673-s001.zip › Table_S3.xlsx]

## Sheet: Sheet1
Table S3 Significant genes with prognosis and differential expressed between acidic (pH 6.5) and normal (pH 7.6) condition
Gene	Cox-regression				DEGs with acidosis		action
	Hazard ratio	Confidence interval		P-value	Fold change	P-value
		High	Low
PCMT1	1.92122	1.44602	2.55259	6.67077e-06	-0.796184	0.00804124	RD
TFPI2	0.863383	0.80825	0.922277	1.28211e-05	-2.19854	0.0243707	PD
TNFRSF14	0.698781	0.592047	0.824757	2.25328e-05	-2.41553	0.0129286	PD
SERPINA1	0.833568	0.762578	0.911167	6.11255e-05	1.83109	0.0415314	PU
STXBP5	1.51146	1.2293	1.85838	8.92277e-05	-1.01064	0.0006671	RD
DEF6	0.698559	0.583023	0.836992	0.000100657	1.28404	0.042603	PU
GSTM4	0.728221	0.618568	0.857311	0.000139574	1.03388	0.00560629	PU
SLC16A2	1.31314	1.13778	1.51553	0.000195333	-2.15499	0.00632592	RD
LGALS2	0.857562	0.789844	0.931087	0.000250966	1.5449	0.00550221	PU
PSMB8	0.751621	0.644645	0.876348	0.000267431	1.12335	0.0133008	PU
MAFA	1.44071	1.1835	1.7538	0.000273562	0.50461	0.043747	RU
FREM1	0.861795	0.794257	0.935075	0.000354076	2.63748	0.0256155	PU
NFE2	0.837903	0.760061	0.923719	0.000378044	0.95057	0.0197538	PU
BTBD6	0.573748	0.420857	0.782184	0.000441935	-0.682053	0.00607791	PD
UBA7	0.756256	0.645348	0.886224	0.000554958	0.903451	0.00232153	PU
KRTCAP3	0.862072	0.792258	0.938038	0.00057221	1.45991	0.000245217	PU
SUSD3	0.88535	0.825744	0.949259	0.000616376	2.47765	0.0155613	PU
ZNF385B	0.892035	0.834589	0.953434	0.000768207	-3.77905	0.00186608	PD
ZIC2	1.10259	1.04098	1.16784	0.000871682	0.59263	0.015528	RU
CYP24A1	0.868571	0.79927	0.943881	0.000895906	4.50911	0.00626847	PU
SIAH2	0.759912	0.646104	0.893767	0.000910778	0.720591	0.0280097	PU
GBP2	0.786174	0.681481	0.90695	0.000968757	-1.58394	0.00506479	PD
PAPLN	0.807979	0.711188	0.917942	0.00105614	1.07429	0.00519077	PU
CHMP4A	0.661593	0.516539	0.84738	0.00107012	-0.687267	0.00761658	PD
HSP90AA1	1.45205	1.16126	1.81567	0.00107115	-0.837049	0.012135	RD
ATG4A	1.7216	1.24298	2.38452	0.00108041	-0.659957	0.0306252	RD
MORN3	0.822193	0.730924	0.924859	0.0011098	1.1175	0.0347659	PU
SVOPL	0.871109	0.800584	0.947846	0.00135792	2.06418	0.0370303	PU
WWOX	1.25767	1.09301	1.44713	0.00136392	1.17696	0.009425	RU
C1RL	0.695877	0.557111	0.869207	0.00139717	1.65538	0.0132295	PU
ALDH3A1	0.848685	0.766883	0.939213	0.00151031	2.20909	0.0112622	PU
SLAIN1	0.882168	0.816376	0.953262	0.00152242	1.68294	0.00668132	PU
CCNA1	0.847772	0.765215	0.939235	0.00158196	1.18635	0.019463	PU
TNFRSF18	0.860896	0.784233	0.945054	0.00164644	1.18066	0.042829	PU
TP63	0.895433	0.835731	0.959399	0.00170513	2.45926	0.00352212	PU
TMEM151B	0.755833	0.63307	0.902401	0.00196406	-1.54738	0.00552501	PD
PLAC8	0.87431	0.802924	0.952043	0.00199588	-0.927298	0.0425076	PD
RPL5	0.677671	0.529342	0.867563	0.00202079	0.595441	0.0299195	PU
FAM111A	0.700654	0.558797	0.878522	0.00205594	-0.887873	0.0020523	PD
C6orf141	0.889068	0.824047	0.95922	0.00240984	-0.809487	0.0431581	PD
TUBA3D	0.910183	0.85644	0.967298	0.00244004	1.36326	0.0368707	PU
NFKBIE	0.721325	0.583227	0.892123	0.00258886	-0.64969	0.0105279	PD
RPPH1	0.835373	0.742471	0.9399	0.00278613	-1.95471	0.0155724	PD
REPS1	1.55073	1.16259	2.06846	0.00283656	-0.580046	0.0092244	RD
TRAF1	0.800699	0.69158	0.927034	0.00294374	1.69095	0.00982732	PU
UBXN1	0.732303	0.595967	0.899826	0.0030347	0.632671	0.0467226	PU
ASB2	0.838335	0.745424	0.942828	0.00325819	1.35067	0.0160767	PU
NPY1R	0.929391	0.885143	0.975851	0.00325952	2.8446	0.032752	PU
GFI1	0.851384	0.764811	0.947757	0.00327486	0.908312	0.00855067	PU
CACNA1H	1.11228	1.03596	1.19422	0.0033459	0.722256	0.0129306	RU
REEP2	0.850315	0.762701	0.947995	0.0034717	1.30957	0.0255388	PU
PARP12	0.715433	0.571411	0.895755	0.00350166	0.935067	0.0232261	PU
POLR3GL	0.685339	0.531482	0.883736	0.00358241	0.569443	0.0173061	PU
ZNF345	0.694723	0.543148	0.888599	0.00372593	0.646037	0.0134328	PU
CALML3	0.926957	0.880579	0.975777	0.00377577	1.16309	0.0187678	PU
PCYT2	0.711332	0.564688	0.896059	0.00383174	-1.16089	0.00985985	PD
TUBA3E	0.911124	0.854964	0.970972	0.0041375	1.56336	0.0289253	PU
PDCD4	0.809773	0.700083	0.93665	0.00449418	0.806707	0.0418405	PU
TMED7-TICAM2	1.16879	1.04944	1.30172	0.00453856	1.13972	0.0167271	RU
MATK	0.879911	0.805265	0.961475	0.00467567	0.632765	0.0277852	PU
TMEM229B	0.826634	0.724109	0.943674	0.00483166	0.637741	0.00985959	PU
ESR2	0.773404	0.646698	0.924935	0.00488153	-1.09315	0.0168113	PD
PROX2	0.6984	0.542772	0.898651	0.0052587	-1.6504	0.0494104	PD
SLC25A29	0.77853	0.652849	0.928407	0.00532117	-0.652739	0.0043403	PD
ANKK1	0.843803	0.748353	0.951428	0.00555585	-2.34999	0.0032126	PD
BTG1	0.729839	0.584047	0.912023	0.00560682	1.13706	0.0217191	PU
COPS5	1.46144	1.11614	1.91357	0.00579982	-0.507308	0.0176326	RD
OSBPL1A	0.759189	0.624002	0.923664	0.00589396	-1.06865	0.00331599	PD
CCDC24	0.806559	0.691992	0.940094	0.00595445	-0.891853	0.0162462	PD
KCNH3	0.862998	0.776973	0.958547	0.00595625	2.142	0.0179142	PU
PMAIP1	0.851132	0.758668	0.954864	0.00601239	1.99112	0.0240982	PU
ATP6V1H	1.4151	1.10445	1.81312	0.00604006	-0.647518	0.0045928	RD
PCDHB2	1.13621	1.03696	1.24495	0.00617773	-0.553515	0.00881025	RD
CABYR	0.821544	0.713662	0.945735	0.00620507	-0.731189	0.0150192	PD
CITED4	0.891194	0.820546	0.967926	0.00626516	1.07462	0.0094097	PU
PCGF5	0.712497	0.558301	0.90928	0.00644439	0.547992	0.00013893	PU
RPS11	0.712567	0.558205	0.909614	0.0065188	0.547105	0.0485921	PU
FLT3LG	0.818164	0.707507	0.946129	0.00679233	1.28055	0.000502653	PU
PCDHGA1	1.1412	1.03674	1.25619	0.00700487	-1.31641	0.0142935	RD
WLS	0.858826	0.768849	0.959332	0.007034	2.90317	0.0246185	PU
SLC45A1	0.833779	0.730514	0.951641	0.00704455	1.68047	0.0410319	PU
GNG4	0.90509	0.84173	0.973219	0.00708	2.79913	0.0395606	PU
EGR3	0.887756	0.813796	0.968438	0.00730609	1.48483	0.0198331	PU
OSTM1	1.48135	1.11133	1.97457	0.00736525	-0.882253	0.00389047	RD
CHORDC1	1.35337	1.08461	1.68874	0.00738307	-0.766173	0.00656369	RD
FAM86B1	0.834618	0.731111	0.952779	0.00745096	0.546593	0.0220595	PU
CHPT1	0.818919	0.707014	0.948537	0.00770526	-0.502848	0.0348998	PD
TCF7	0.836053	0.732699	0.953985	0.00782216	0.949002	0.0266106	PU
RGS9	0.889188	0.815395	0.969659	0.00788375	1.45595	0.00738245	PU
BLK	0.899584	0.831928	0.972741	0.00798361	2.5648	0.000809085	PU
STK17A	0.720604	0.565252	0.918653	0.00817336	-0.517328	0.0315696	PD
GCGR	0.71286	0.554338	0.916715	0.0083491	2.21032	0.00742171	PU
LIFR	0.851201	0.755113	0.959516	0.00838425	-0.619908	0.0155398	PD
ERCC1	0.668625	0.495232	0.902727	0.00858632	0.798187	0.036459	PU
IFT172	0.730076	0.577289	0.923302	0.00863796	0.601998	0.0193235	PU
MARVELD1	1.2885	1.06605	1.55738	0.008756	-0.651141	0.000304463	RD
DTX3	0.778381	0.643912	0.94093	0.00962017	0.61891	0.0301964	PU
NGFR	0.899906	0.830642	0.974946	0.00985453	2.20524	0.02343	PU
ANXA8	0.9265	0.874299	0.981817	0.009876	2.83724	0.0459999	PU
C2orf88	0.859582	0.765448	0.965292	0.0105608	-0.686185	0.0336445	PD
TTC21A	0.804064	0.679902	0.9509	0.0108259	-0.657852	0.0195308	PD
MEA1	0.68346	0.509867	0.916155	0.0109056	-0.629407	0.034162	PD
C6orf226	0.786669	0.653713	0.946666	0.0110791	-0.877682	0.0193991	PD
TESC	0.871084	0.782908	0.969192	0.0112558	1.37269	0.0181298	PU
ZFC3H1	1.39418	1.07737	1.80416	0.0115185	0.542347	0.0107448	RU
RGL3	0.911448	0.848142	0.97948	0.0115873	3.43248	0.000766773	PU
FAM114A1	1.31171	1.06252	1.61934	0.0115988	0.684411	0.00359831	RU
CADM4	0.827547	0.714254	0.95881	0.0117384	1.13849	0.00103286	PU
HNRNPA1	0.637302	0.448911	0.904754	0.0117421	0.573658	0.0153167	PU
ZNF75D	1.46618	1.08796	1.97589	0.0119444	0.568738	0.0131017	RU
LIME1	0.874153	0.786964	0.971001	0.012111	-0.527166	0.0479711	PD
TTC32	0.778239	0.639514	0.947058	0.0123146	0.591114	0.00478654	PU
FBXO6	0.771625	0.629546	0.945769	0.0125259	0.588396	0.0492666	PU
FLRT1	0.825869	0.710705	0.959693	0.0125285	-1.11882	0.0331556	PD
ZNF404	0.802542	0.675009	0.954171	0.0127291	1.87632	0.000434806	PU
SMARCD3	0.830484	0.717301	0.961526	0.0129624	1.43463	0.00979195	PU
DIRC3	1.18859	1.03706	1.36227	0.013031	2.74978	0.0330403	RU
C10orf67	0.815726	0.694567	0.958021	0.0130385	2.62005	0.00161681	PU
PSMD2	1.45668	1.08228	1.9606	0.0130788	-0.572307	0.0132295	RD
CD7	0.891596	0.814227	0.976317	0.0132318	1.40748	0.00197473	PU
TATDN1	1.31648	1.05908	1.63643	0.0132472	0.744299	0.0144753	RU
NUB1	0.62116	0.425915	0.905909	0.0133902	0.507763	0.0010928	PU
PNKD	0.764375	0.617725	0.94584	0.0134248	0.5471	0.0148726	PU
ACAA1	0.739187	0.581464	0.939692	0.013589	-0.813662	0.000219263	PD
GBP1	0.870173	0.779125	0.971861	0.0136581	1.76729	0.0118094	PU
MYD88	0.66317	0.478391	0.919319	0.0137094	-0.638584	0.00281059	PD
HSPH1	1.29343	1.05363	1.5878	0.0139213	-1.18808	0.00799231	RD
UBE2L6	0.812871	0.688335	0.959939	0.014613	1.64052	0.017195	PU
UBE2G1	1.57464	1.09372	2.26703	0.0146158	0.653258	0.000629595	RU
RABGAP1	1.56255	1.09185	2.23618	0.0146684	0.658677	0.00365847	RU
APOL2	0.776288	0.633337	0.951505	0.0147406	-0.69624	0.0135996	PD
IFT57	0.734906	0.573439	0.941837	0.0149593	0.737613	0.0222441	PU
AMPD1	0.881892	0.796908	0.975939	0.0150554	1.67997	0.0173396	PU
CCDC146	0.82178	0.701349	0.962892	0.0151969	2.42775	4.14691e-05	PU
MYO15B	0.865686	0.770419	0.972733	0.01532	0.936001	0.0447864	PU
RASAL3	0.853193	0.75043	0.970028	0.0153216	1.7874	0.00781881	PU
NTRK2	0.902823	0.831126	0.980706	0.0154597	1.26225	0.00347418	PU
TNFAIP8	0.793556	0.658078	0.956926	0.0154803	1.1739	0.00583217	PU
PSMD1	1.57189	1.08944	2.26799	0.015608	-0.720859	0.0182201	RD
SGSH	0.692637	0.513894	0.93355	0.0158886	-0.638242	0.00192707	PD
CC2D1B	0.649101	0.456538	0.922884	0.0160878	-0.859693	0.00149821	PD
RDH16	1.11024	1.0195	1.20905	0.0162202	-0.87718	0.0361044	RD
SEC14L5	0.868597	0.7743	0.974377	0.016276	0.888105	0.0252744	PU
TMEM163	0.861602	0.762899	0.973075	0.0164111	1.6857	0.00787085	PU
SIRT7	0.742337	0.581829	0.947124	0.0165297	-0.55638	0.0352673	PD
CYBA	0.856253	0.754196	0.972119	0.0165452	3.09865	0.00618658	PU
BEGAIN	0.87184	0.77917	0.975533	0.0167569	1.26717	0.0113115	PU
JRKL	1.20983	1.03499	1.41421	0.0167678	1.06378	0.00534918	RU
MICAL1	0.798048	0.663271	0.960212	0.0168416	-1.17499	0.000910863	PD
RPS16	0.758577	0.60456	0.95183	0.0170176	0.576186	0.0496575	PU
SGK3	0.845066	0.735876	0.970458	0.0170893	-1.17162	0.00602475	PD
EIF3F	0.685702	0.502515	0.935667	0.0173467	0.50653	0.0236911	PU
PAK1	0.778242	0.632695	0.957271	0.0176278	1.44611	0.0053251	PU
ABHD8	0.768306	0.617969	0.955216	0.0176743	0.773554	0.0157934	PU
B4GALNT2	1.0896	1.01492	1.16978	0.0178512	0.754561	0.0085324	RU
TP53I11	1.31094	1.04761	1.64047	0.0179584	0.623038	0.0143908	RU
EMID1	0.89492	0.816188	0.981248	0.018135	1.00239	0.0289249	PU
PEX3	1.38991	1.0576	1.82663	0.0181907	-0.663254	0.0311167	RD
STAT5A	0.806238	0.674271	0.964033	0.018196	0.731619	0.0243399	PU
PBX4	0.864962	0.7666	0.975944	0.0185076	0.997993	0.0264677	PU
ANO9	0.861207	0.760495	0.975258	0.0185328	0.79699	0.00672937	PU
RAP1GAP2	1.19803	1.0307	1.39253	0.0185795	0.650543	0.00448637	RU
RPS25	0.75896	0.603203	0.954935	0.0186008	0.755131	0.0341657	PU
ITGA10	0.879124	0.789661	0.978723	0.0186369	-2.67828	0.00523458	PD
SLC39A8	0.836641	0.721053	0.970758	0.0187137	-1.11532	0.0210013	PD
SLC47A2	0.812781	0.68371	0.966217	0.0187996	2.63523	0.00568808	PU
ANO7	0.832766	0.71455	0.97054	0.0191413	1.11717	0.0194518	PU
APOM	0.841745	0.728689	0.972342	0.0192265	0.968185	0.0210961	PU
SERPINB9	0.836411	0.720185	0.971394	0.0192749	-0.713131	0.0156784	PD
CDKN1C	0.85026	0.741928	0.974409	0.0196601	2.51059	0.00922802	PU
ROPN1B	0.926409	0.868646	0.988013	0.0199603	1.75644	0.0134835	PU
COCH	0.91741	0.853161	0.986497	0.0199673	1.52713	0.000356685	PU
AASS	0.846134	0.734907	0.974195	0.0201496	0.582156	0.0178771	PU
SERPINF2	0.872733	0.777791	0.979263	0.0205271	0.963722	0.000492555	PU
SKAP1	0.902702	0.827702	0.984497	0.0207224	4.20977	0.000475267	PU
REC8	0.891012	0.807685	0.982935	0.0212475	-1.06468	0.0365696	PD
CXCR6	0.89538	0.814907	0.9838	0.0214548	-2.53982	0.000429624	PD
RANGRF	0.782029	0.633352	0.965607	0.0222972	0.585928	0.0392876	PU
SYT1	0.935468	0.883442	0.990557	0.0223158	0.702441	0.0227156	PU
ACOT1	0.820265	0.691924	0.972411	0.0224758	-1.3541	0.00443669	PD
FAM131A	0.750821	0.58701	0.960346	0.0224792	-3.86772	0.00427204	PD
RFXANK	0.757901	0.596604	0.962805	0.023182	0.673415	0.00288057	PU
EPHA3	1.11391	1.01466	1.22286	0.0234721	-4.01851	0.000843956	RD
GPR27	0.87931	0.78669	0.982834	0.0235208	-0.612235	0.00217414	PD
COPG2	0.735157	0.563051	0.959869	0.0237621	0.771371	0.00107589	PU
B4GALNT4	0.874167	0.777891	0.982358	0.023887	0.632531	0.000575328	PU
B9D1	0.814768	0.681996	0.973389	0.023999	0.871076	0.00170412	PU
USP26	1.21405	1.02572	1.43696	0.024116	-1.25311	0.0104137	RD
PDZK1P1	0.896929	0.815987	0.9859	0.0241813	-1.12625	0.0134621	PD
RASGRP1	0.897784	0.817382	0.986095	0.0242915	1.59482	0.0431577	PU
C11orf49	0.750902	0.58503	0.963803	0.0244836	0.741324	0.00532389	PU
LTF	0.949675	0.907862	0.993414	0.0246036	-2.10521	0.0201626	PD
C2CD2	1.2626	1.03022	1.54741	0.0246529	1.59717	0.0377865	RU
TMEM98	0.867398	0.766096	0.982095	0.0247613	1.50944	0.0276567	PU
HLA-DRB1	0.873187	0.775444	0.983251	0.0251667	0.553575	0.0497167	PU
ZNF485	1.28454	1.03129	1.59998	0.0254209	-0.519201	0.0313618	RD
TCTN2	0.788816	0.640573	0.971365	0.0255159	1.35085	0.000627153	PU
TAS2R19	0.782691	0.631095	0.970703	0.0257024	1.30656	0.0309104	PU
EIF4EBP1	1.16139	1.01819	1.32474	0.0258554	0.783759	0.0129625	RU
SMAD5	1.3837	1.03898	1.84279	0.0263165	0.899666	9.29624e-05	RU
IFI35	0.843555	0.72589	0.980293	0.0264428	0.895068	0.0231157	PU
AMPH	0.906719	0.831365	0.988902	0.0269614	-4.06597	0.000516736	PD
CDRT4	0.779719	0.625364	0.972173	0.0270561	-3.11427	0.0161404	PD
NCOA2	1.15172	1.016	1.30557	0.0272385	-0.617842	0.0139082	RD
AKNAD1	1.19689	1.02032	1.404	0.0273115	-1.52644	0.0089504	RD
GGT7	0.839877	0.719223	0.980772	0.0274304	0.56769	0.0373282	PU
DHX40P1	1.16134	1.01658	1.32671	0.0276572	1.1209	0.0297655	RU
CCDC106	0.83952	0.718383	0.981084	0.0277947	-1.45037	0.0193281	PD
TTC19	1.38829	1.03629	1.85986	0.0278882	0.659474	0.00544339	RU
OSBPL10	1.26436	1.02556	1.55877	0.0280704	-0.579902	0.0010835	RD
MKRN1	0.627527	0.413044	0.953386	0.0289867	0.694995	0.00691524	PU
TP53I3	0.805389	0.663016	0.978335	0.0292093	-1.04857	0.00481322	PD
ZFAND1	1.31591	1.02811	1.68426	0.0292472	0.886494	0.0112005	RU
CNPY3	0.743482	0.569517	0.970585	0.0292949	-0.5073	0.0165277	PD
FFAR2	1.1009	1.00959	1.20047	0.0295456	-0.98624	0.00291359	RD
SNCAIP	0.895794	0.811111	0.989318	0.0298617	1.89248	0.0266477	PU
SNX18	1.37142	1.03064	1.82488	0.0302332	0.71176	0.00904509	RU
LYZL2	1.14145	1.01271	1.28656	0.030255	1.16126	0.0456458	RU
PAQR8	0.818583	0.682965	0.981132	0.0303048	0.81445	0.0158164	PU
KIF17	0.840767	0.718649	0.983636	0.0303098	1.13206	0.0119421	PU
CYP1B1	0.884614	0.791722	0.988405	0.0303113	-0.793976	0.0081546	PD
RAB34	0.840553	0.718113	0.98387	0.0305869	-1.21191	0.0181111	PD
FAM172A	1.34014	1.02722	1.7484	0.0309375	0.53385	0.00409447	RU
DSG2	0.84232	0.720752	0.984392	0.0309455	0.534418	0.00018166	PU
SCUBE2	0.945437	0.898299	0.995048	0.0315401	-1.15654	0.00740076	PD
NME6	1.49737	1.03583	2.16457	0.0317763	-0.586031	0.00553231	RD
RPL24	0.761286	0.593477	0.976545	0.031811	0.884703	0.0167652	PU
PLCL1	0.893387	0.805947	0.990314	0.0319385	1.01455	1.55047e-08	PU
SDHA	1.39579	1.0287	1.89387	0.0322159	0.56835	0.00579423	RU
SGCE	0.883745	0.789227	0.989583	0.0322412	1.64272	0.00510119	PU
GABRP	0.955384	0.916265	0.996172	0.0323751	6.01565	0.00139924	PU
CNDP1	0.836812	0.710809	0.985152	0.0323856	1.34748	0.0495942	PU
IGSF10	0.909422	0.833606	0.992133	0.0325326	-0.77461	0.0420545	PD
IFI27L2	0.848568	0.729934	0.986484	0.0325927	1.00832	0.00814334	PU
HLA-G	0.900998	0.818731	0.991531	0.0328379	-1.46127	0.0310613	PD
MICB	0.867332	0.760993	0.988531	0.0329394	-2.30236	0.00351529	PD
SERPING1	0.846311	0.725765	0.986879	0.0333012	2.70802	0.00262193	PU
TNFAIP2	0.849121	0.730359	0.987194	0.0333676	1.92497	0.00253009	PU
SQLE	1.17109	1.01247	1.35455	0.0334286	-1.23331	0.00275383	RD
ARL4D	0.862721	0.752914	0.988543	0.0335147	2.86442	0.00170836	PU
AMN1	0.797639	0.646794	0.983663	0.0345175	0.872836	0.00514937	PU
NUMBL	0.786162	0.628796	0.982911	0.0347534	0.749428	0.00942298	PU
PKN3	0.828912	0.696208	0.986909	0.0350307	1.4755	0.00557841	PU
PRKG1	1.11595	1.00741	1.23618	0.0356123	-1.52519	0.00880079	RD
TMEM115	0.723807	0.535158	0.978956	0.0359041	-0.585763	0.00474606	PD
CCNJL	0.886932	0.792788	0.992256	0.0361041	2.20658	8.20633e-05	PU
LRFN5	0.891753	0.80109	0.992678	0.0362321	2.22532	0.00251585	PU
PPM1L	1.15702	1.00937	1.32627	0.0362738	-1.27276	4.96924e-05	RD
PTPN22	0.887953	0.794392	0.992533	0.036448	-0.765346	0.00689782	PD
RND2	0.908055	0.829529	0.994014	0.0366115	1.42422	0.0186912	PU
IL17RB	0.869437	0.762472	0.991408	0.0367268	-0.814825	0.0268579	PD
VGF	1.08386	1.00491	1.169	0.0368884	-3.22988	0.000429125	RD
FUCA2	1.32703	1.01584	1.73355	0.037968	-0.949253	0.00422302	RD
RPGRIP1	0.844091	0.719107	0.990797	0.038168	-1.21953	0.0109196	PD
FASTKD3	1.42356	1.0193	1.98817	0.0382556	0.517594	0.0349561	RU
HMGCLL1	0.919966	0.850155	0.99551	0.0382908	-1.49253	0.0154356	PD
MYLK3	1.12239	1.00605	1.25218	0.0386434	1.17036	0.017335	RU
RFX5	0.742611	0.560088	0.984615	0.038669	0.96646	0.00638029	PU
PCDHB3	1.10456	1.00519	1.21376	0.038674	-0.69544	0.00778209	RD
PITPNM3	1.14177	1.00666	1.29502	0.0390922	2.02831	0.000571528	RU
CAMK2N2	1.12644	1.00596	1.26136	0.0391199	-1.32218	0.00222578	RD
LSS	1.27938	1.01217	1.61715	0.0392893	-0.801765	0.00818827	RD
EPHA1	0.80861	0.660696	0.989638	0.0393015	1.24295	0.00121366	PU
HLA-DRA	0.870324	0.762607	0.993256	0.0393655	1.80863	0.0456565	PU
SLC25A35	0.838186	0.708399	0.991751	0.0397375	0.803213	0.0160695	PU
RPS14	0.780611	0.616312	0.988708	0.0399616	0.910178	0.0284209	PU
DIO3OS	0.808369	0.659757	0.990457	0.0401231	2.68618	0.00278246	PU
OTOR	1.10273	1.00436	1.21073	0.0402377	-1.85459	0.00191874	RD
GPLD1	0.884538	0.786603	0.994666	0.0404339	0.842386	0.00994592	PU
HLTF	1.2466	1.00909	1.54001	0.040966	0.644181	0.00273835	RU
ZFP36L2	0.83299	0.698995	0.99267	0.0411334	1.21225	0.00710625	PU
LY6G5C	0.83682	0.705237	0.992954	0.041253	-0.882802	0.0172129	PD
HIVEP3	0.798051	0.642481	0.99129	0.0414461	0.572578	0.0395922	PU
ATP6AP1	1.31326	1.0099	1.70775	0.0420083	-0.603343	0.0143174	RD
IFITM1	0.887122	0.790355	0.995736	0.0421059	1.82296	0.00450551	PU
RNF183	0.930565	0.868073	0.997557	0.0424652	1.73828	0.0239963	PU
TMPRSS3	0.94109	0.887447	0.997975	0.0425951	0.869182	0.00604686	PU
WDR86	0.903807	0.819321	0.997005	0.0433976	1.44387	0.0025459	PU
RDX	1.24084	1.0063	1.53003	0.0435123	2.1846	0.00762614	RU
SDCBP2	1.12821	1.00329	1.26868	0.0439245	-0.892083	0.0384804	RD
GBP3	0.894004	0.801569	0.997099	0.0442047	1.91686	0.0132121	PU
PTPN23	0.661423	0.442163	0.989411	0.044244	-0.564875	0.0046133	PD
PRKG2	1.10893	1.00266	1.22648	0.0442626	2.72808	0.00255609	RU
THTPA	0.786704	0.622502	0.994218	0.0445888	-0.500404	0.00768438	PD
ERCC8	1.43561	1.00824	2.04414	0.0449105	0.625022	0.000391708	RU
MST1P2	0.891528	0.796883	0.997415	0.0449446	0.69918	0.0239207	PU
RYR1	0.91812	0.844483	0.998178	0.0452087	1.49283	0.00914552	PU
ACSL1	1.14576	1.00279	1.30912	0.0454038	0.692807	0.0392709	RU
ARMC3	0.928405	0.863228	0.998504	0.0454695	1.64954	0.0118454	PU
C15orf48	0.906154	0.822569	0.998232	0.0459548	2.06317	0.0296337	PU
SLC29A1	1.20735	1.00322	1.45301	0.0461587	-0.735411	0.0272013	RD
ATF5	0.791604	0.628565	0.996931	0.0470238	-0.61731	0.00214719	PD
TMEM67	1.23187	1.00248	1.51374	0.0473108	0.860933	0.00175018	RU
CCT2	1.27593	1.00278	1.62349	0.0474168	-0.530121	0.0395902	RD
BST2	0.902419	0.815255	0.998902	0.0475742	1.43158	0.00292765	PU
KLK7	0.947965	0.899012	0.999582	0.0482223	4.69496	0.00833379	PU
NKTR	0.782871	0.613967	0.998241	0.0483634	-0.857731	0.029324	PD
TLN2	0.833613	0.695783	0.998745	0.0484298	-0.927363	0.00221108	PD
BACH2	0.889732	0.792249	0.999208	0.0484571	1.56354	0.00420312	PU
C17orf49	0.746138	0.55775	0.998156	0.0485646	0.616687	0.0246223	PU
C1R	0.867701	0.75349	0.999223	0.0487509	2.11697	0.01718	PU
AZU1	0.9162	0.839788	0.999564	0.048864	0.835229	0.0284523	PU
NDUFAF3	0.794521	0.631881	0.999023	0.0490307	-0.707824	0.0087317	PD
RASGRP2	0.90381	0.817214	0.999582	0.0490565	1.74272	0.000176205	PU
ALDH2	0.878161	0.77137	0.999737	0.049537	2.55275	0.00320564	PU
CHRNA9	0.900655	0.811302	0.999848	0.0496681	1.86034	0.0219998	PU
ZDHHC8P1	0.887394	0.787517	0.999937	0.0498798	0.864399	0.0498791	PU
