# Supplementary material for: In Silico Evaluation of Natural Compounds for an Acidic Extracellular Environment in Human Breast Cancer
Source: Cells. 2021 Oct 6;10(10):2673. doi: 10.3390/cells10102673 (PMC8534855; doi:10.3390/cells10102673)
Supplement: Supplementary file 1 [file cells-10-02673-s001.zip › Table_S4.xlsx]

## Sheet: Sheet1
Table S4 Significant genes with differential expressed between each compound treated and control group according to acidosis dependent prognosis-related genes
Gene	Cox-regression				DEGs with acidosis		action	DEGs with compound
	Hazard ratio	Confidence interval		P-value	Fold change	P-value		Compound	Gene | probe ID	Fold change	P-value
		High	Low
ERCC1	0.668625	0.495232	0.902727	0.00858632	0.798187	0.036459	UP	Puerarin	ERCC1|203720_s_at	0.610616	0.014942
SYT1	0.935468	0.883442	0.990557	0.0223158	0.702441	0.0227156	UP	Puerarin	SYT1|203998_s_at	0.675553	0.0262795
RASGRP2	0.90381	0.817214	0.999582	0.0490565	1.74272	0.000176205	UP	Puerarin	RASGRP2|208206_s_at	-2.24642	0.0161138
ATP6AP1	1.31326	1.0099	1.70775	0.0420083	-0.603343	0.0143174	DR	Puerarin	ATP6AP1|207809_s_at	0.504709	0.0196082
TP63	0.895433	0.835731	0.959399	0.00170513	2.45926	0.00352212	UP	Puerarin	TP63|209863_s_at	0.776555	0.0221955
HSP90AA1	1.45205	1.16126	1.81567	0.00107115	-0.837049	0.012135	DR	Puerarin	HSP90AA1|210211_s_at	-0.621789	0.0337893
HSP90AA1	1.45205	1.16126	1.81567	0.00107115	-0.837049	0.012135	DR	Puerarin	HSP90AA1|214328_s_at	-0.680507	0.0436677
FLT3LG	0.818164	0.707507	0.946129	0.00679233	1.28055	0.000502653	UP	Puerarin	FLT3LG|206980_s_at	-1.60773	0.0063235
RPGRIP1	0.844091	0.719107	0.990797	0.038168	-1.21953	0.0109196	DP	Puerarin	RPGRIP1|206608_s_at	0.770279	0.0316242
ATG4A	1.7216	1.24298	2.38452	0.00108041	-0.659957	0.0306252	DR	Puerarin	ATG4A|213115_at	-0.708696	0.0478717
SQLE	1.17109	1.01247	1.35455	0.0334286	-1.23331	0.00275383	DR	Puerarin	SQLE|213577_at	0.575563	0.0166726
TFPI2	0.863383	0.80825	0.922277	1.28211e-05	-2.19854	0.0243707	DP	Puerarin	TFPI2|209278_s_at	0.756414	0.00286178
B9D1	0.814768	0.681996	0.973389	0.023999	0.871076	0.00170412	UP	Puerarin	B9D1|210534_s_at	0.812401	0.0273363
SMAD5	1.3837	1.03898	1.84279	0.0263165	0.899666	9.29624e-05	UR	Puerarin	SMAD5|205187_at	1.38795	0.014188
SMAD5	1.3837	1.03898	1.84279	0.0263165	0.899666	9.29624e-05	UR	Puerarin	SMAD5|205188_s_at	1.36031	0.00780941
NKTR	0.782871	0.613967	0.998241	0.0483634	-0.857731	0.029324	DP	Puerarin	NKTR|215338_s_at	0.884198	0.0131536
GBP1	0.870173	0.779125	0.971861	0.0136581	1.76729	0.0118094	UP	Puerarin	GBP1|202270_at	2.27211	0.0200331
HSPH1	1.29343	1.05363	1.5878	0.0139213	-1.18808	0.00799231	DR	Puerarin	HSPH1|206976_s_at	-0.571014	0.0248791
HSPH1	1.29343	1.05363	1.5878	0.0139213	-1.18808	0.00799231	DR	Puerarin	HSPH1|208744_x_at	1.08751	0.0112701
STAT5A	0.806238	0.674271	0.964033	0.018196	0.731619	0.0243399	UP	Puerarin	STAT5A|203010_at	1.3399	0.0267789
SGCE	0.883745	0.789227	0.989583	0.0322412	1.64272	0.00510119	UP	Puerarin	SGCE|204688_at	-0.720225	0.00566282
BST2	0.902419	0.815255	0.998902	0.0475742	1.43158	0.00292765	UP	Puerarin	BST2|201641_at	-0.821295	0.0124948
PTPN22	0.887953	0.794392	0.992533	0.036448	-0.765346	0.00689782	DP	Puerarin	PTPN22|208010_s_at	-0.991238	0.00870731
HNRNPA1	0.637302	0.448911	0.904754	0.0117421	0.573658	0.0153167	UP	Puerarin	HNRNPA1|222040_at	1.11124	0.0147502
BLK	0.899584	0.831928	0.972741	0.00798361	2.5648	0.000809085	UP	Puerarin	BLK|210934_at	3.60115	0.0264287
RDX	1.24084	1.0063	1.53003	0.0435123	2.1846	0.00762614	UR	Puerarin	RDX|204969_s_at	0.73955	0.00311719
RDX	1.24084	1.0063	1.53003	0.0435123	2.1846	0.00762614	UR	Puerarin	RDX|212398_at	1.03139	0.0115035
SLC39A8	0.836641	0.721053	0.970758	0.0187137	-1.11532	0.0210013	DP	Puerarin	SLC39A8|209267_s_at	0.589989	0.0050066
PMAIP1	0.851132	0.758668	0.954864	0.00601239	1.99112	0.0240982	UP	Puerarin	PMAIP1|204286_s_at	-0.705432	0.00709274
RPS11	0.712567	0.558205	0.909614	0.0065188	0.547105	0.0485921	UP	Puerarin	RPS11|213350_at	-2.83249	0.00468224
NFKBIE	0.721325	0.583227	0.892123	0.00258886	-0.64969	0.0105279	DP	Puerarin	NFKBIE|203927_at	-0.819594	0.0184146
NTRK2	0.902823	0.831126	0.980706	0.0154597	1.26225	0.00347418	UP	Puerarin	NTRK2|207152_at	2.48314	0.0314474
NTRK2	0.902823	0.831126	0.980706	0.0154597	1.26225	0.00347418	UP	Puerarin	NTRK2|221796_at	-3.43773	0.00816163
RPS14	0.780611	0.616312	0.988708	0.0399616	0.910178	0.0284209	UP	Puerarin	RPS14|214245_at	-0.788696	0.0279981
CCT2	1.27593	1.00278	1.62349	0.0474168	-0.530121	0.0395902	DR	Puerarin	CCT2|201946_s_at	1.06678	2.93138e-05
KLK7	0.947965	0.899012	0.999582	0.0482223	4.69496	0.00833379	UP	Puerarin	KLK7|205778_at	-2.85027	0.0221874
ATF5	0.791604	0.628565	0.996931	0.0470238	-0.61731	0.00214719	DP	Puerarin	ATF5|204999_s_at	1.04354	0.00283284
RASGRP1	0.897784	0.817382	0.986095	0.0242915	1.59482	0.0431577	UP	Puerarin	RASGRP1|205590_at	0.740388	0.0122768
TP53I11	1.31094	1.04761	1.64047	0.0179584	0.623038	0.0143908	UR	Puerarin	TP53I11|216919_at	1.49815	0.0351925
SCUBE2	0.945437	0.898299	0.995048	0.0315401	-1.15654	0.00740076	DP	Puerarin	SCUBE2|219197_s_at	0.590583	0.00374142
EIF3F	0.685702	0.502515	0.935667	0.0173467	0.50653	0.0236911	UP	Puerarin	EIF3F|200865_at	-2.96562	0.0132832
SIAH2	0.759912	0.646104	0.893767	0.000910778	0.720591	0.0280097	UP	Puerarin	SIAH2|209339_at	0.770933	0.0415552
WWOX	1.25767	1.09301	1.44713	0.00136392	1.17696	0.009425	UR	Puerarin	WWOX|219077_s_at	0.662119	0.0471954
MST1P2	0.891528	0.796883	0.997415	0.0449446	0.69918	0.0239207	UP	Puerarin	MST1P2|213380_x_at	0.991711	0.0284991
ZNF75D	1.46618	1.08796	1.97589	0.0119444	0.568738	0.0131017	UR	Puerarin	ZNF75D|214813_at	0.750864	0.0323565
CACNA1H	1.11228	1.03596	1.19422	0.0033459	0.722256	0.0129306	UR	Puerarin	CACNA1H|205845_at	1.71293	0.0192672
CYP24A1	0.868571	0.79927	0.943881	0.000895906	4.50911	0.00626847	UP	Ainsliadimer A	CYP24A1|206504_at	-1.47519	0.00777514
DSG2	0.84232	0.720752	0.984392	0.0309455	0.534418	0.00018166	UP	Ainsliadimer A	DSG2|217901_at	-1.07484	0.0481465
TRAF1	0.800699	0.69158	0.927034	0.00294374	1.69095	0.00982732	UP	Ainsliadimer A	TRAF1|205599_at	-1.47124	0.0277882
SYT1	0.935468	0.883442	0.990557	0.0223158	0.702441	0.0227156	UP	Ainsliadimer A	SYT1|203998_s_at	-0.65257	0.0291355
ATP6AP1	1.31326	1.0099	1.70775	0.0420083	-0.603343	0.0143174	DR	Ainsliadimer A	ATP6AP1|207809_s_at	0.652261	0.00352019
TP63	0.895433	0.835731	0.959399	0.00170513	2.45926	0.00352212	UP	Ainsliadimer A	TP63|211834_s_at	-2.51089	0.031524
HSP90AA1	1.45205	1.16126	1.81567	0.00107115	-0.837049	0.012135	DR	Ainsliadimer A	HSP90AA1|211968_s_at	1.25529	0.00446964
HSP90AA1	1.45205	1.16126	1.81567	0.00107115	-0.837049	0.012135	DR	Ainsliadimer A	HSP90AA1|214328_s_at	-0.638822	0.00364283
SQLE	1.17109	1.01247	1.35455	0.0334286	-1.23331	0.00275383	DR	Ainsliadimer A	SQLE|213562_s_at	1.94255	0.0131817
TFPI2	0.863383	0.80825	0.922277	1.28211e-05	-2.19854	0.0243707	DP	Ainsliadimer A	TFPI2|209277_at	-1.46535	0.0479038
TFPI2	0.863383	0.80825	0.922277	1.28211e-05	-2.19854	0.0243707	DP	Ainsliadimer A	TFPI2|209278_s_at	-1.30963	0.00115752
SMAD5	1.3837	1.03898	1.84279	0.0263165	0.899666	9.29624e-05	UR	Ainsliadimer A	SMAD5|205188_s_at	1.092	0.0105245
RPL24	0.761286	0.593477	0.976545	0.031811	0.884703	0.0167652	UP	Ainsliadimer A	RPL24|200013_at	-0.521876	0.00171552
IFT57	0.734906	0.573439	0.941837	0.0149593	0.737613	0.0222441	UP	Ainsliadimer A	IFT57|218100_s_at	-0.823594	0.000128001
HSPH1	1.29343	1.05363	1.5878	0.0139213	-1.18808	0.00799231	DR	Ainsliadimer A	HSPH1|208744_x_at	1.45226	0.0113588
RPL5	0.677671	0.529342	0.867563	0.00202079	0.595441	0.0299195	UP	Ainsliadimer A	RPL5|210034_s_at	-1.03295	0.0357599
BST2	0.902419	0.815255	0.998902	0.0475742	1.43158	0.00292765	UP	Ainsliadimer A	BST2|201641_at	-1.05234	0.0164362
RAP1GAP2	1.19803	1.0307	1.39253	0.0185795	0.650543	0.00448637	UR	Ainsliadimer A	RAP1GAP2|213280_at	-0.676041	0.044306
BTG1	0.729839	0.584047	0.912023	0.00560682	1.13706	0.0217191	UP	Ainsliadimer A	BTG1|200921_s_at	-0.570083	0.0101648
PTPN22	0.887953	0.794392	0.992533	0.036448	-0.765346	0.00689782	DP	Ainsliadimer A	PTPN22|206060_s_at	0.784909	0.0445248
HNRNPA1	0.637302	0.448911	0.904754	0.0117421	0.573658	0.0153167	UP	Ainsliadimer A	HNRNPA1|200016_x_at	-0.541533	0.00841193
HNRNPA1	0.637302	0.448911	0.904754	0.0117421	0.573658	0.0153167	UP	Ainsliadimer A	HNRNPA1|213356_x_at	-0.554809	0.0207897
BLK	0.899584	0.831928	0.972741	0.00798361	2.5648	0.000809085	UP	Ainsliadimer A	BLK|206255_at	-0.726899	0.0430555
BLK	0.899584	0.831928	0.972741	0.00798361	2.5648	0.000809085	UP	Ainsliadimer A	BLK|210934_at	3.4667	0.0263481
CNPY3	0.743482	0.569517	0.970585	0.0292949	-0.5073	0.0165277	DP	Ainsliadimer A	CNPY3|217931_at	0.794246	0.0103393
RDX	1.24084	1.0063	1.53003	0.0435123	2.1846	0.00762614	UR	Ainsliadimer A	RDX|212397_at	-0.760253	0.00470073
CYP1B1	0.884614	0.791722	0.988405	0.0303113	-0.793976	0.0081546	DP	Ainsliadimer A	CYP1B1|202434_s_at	3.04513	8.30221e-05
CYP1B1	0.884614	0.791722	0.988405	0.0303113	-0.793976	0.0081546	DP	Ainsliadimer A	CYP1B1|202435_s_at	-0.726049	0.00574936
CYP1B1	0.884614	0.791722	0.988405	0.0303113	-0.793976	0.0081546	DP	Ainsliadimer A	CYP1B1|202436_s_at	-0.723611	0.00250668
SLC39A8	0.836641	0.721053	0.970758	0.0187137	-1.11532	0.0210013	DP	Ainsliadimer A	SLC39A8|209267_s_at	-0.525305	0.00567313
RPS11	0.712567	0.558205	0.909614	0.0065188	0.547105	0.0485921	UP	Ainsliadimer A	RPS11|213350_at	-2.5649	0.00409802
TNFAIP8	0.793556	0.658078	0.956926	0.0154803	1.1739	0.00583217	UP	Ainsliadimer A	TNFAIP8|208296_x_at	-0.676293	0.0142414
NTRK2	0.902823	0.831126	0.980706	0.0154597	1.26225	0.00347418	UP	Ainsliadimer A	NTRK2|207152_at	2.2749	0.0286681
SERPING1	0.846311	0.725765	0.986879	0.0333012	2.70802	0.00262193	UP	Ainsliadimer A	SERPING1|200986_at	-1.63919	0.0279052
PDCD4	0.809773	0.700083	0.93665	0.00449418	0.806707	0.0418405	UP	Ainsliadimer A	PDCD4|202731_at	1.31055	0.0216114
ZFP36L2	0.83299	0.698995	0.99267	0.0411334	1.21225	0.00710625	UP	Ainsliadimer A	ZFP36L2|201367_s_at	3.61633	0.0409114
ZFP36L2	0.83299	0.698995	0.99267	0.0411334	1.21225	0.00710625	UP	Ainsliadimer A	ZFP36L2|201368_at	-0.501985	0.00501804
CABYR	0.821544	0.713662	0.945735	0.00620507	-0.731189	0.0150192	DP	Ainsliadimer A	CABYR|219928_s_at	0.576357	0.0166099
TMPRSS3	0.94109	0.887447	0.997975	0.0425951	0.869182	0.00604686	UP	Ainsliadimer A	TMPRSS3|220177_s_at	0.745498	0.00838705
NPY1R	0.929391	0.885143	0.975851	0.00325952	2.8446	0.032752	UP	Ainsliadimer A	NPY1R|205440_s_at	-1.45212	0.0202201
STK17A	0.720604	0.565252	0.918653	0.00817336	-0.517328	0.0315696	DP	Ainsliadimer A	STK17A|202694_at	1.44028	0.0065894
STK17A	0.720604	0.565252	0.918653	0.00817336	-0.517328	0.0315696	DP	Ainsliadimer A	STK17A|202695_s_at	0.975349	0.0420402
RPS14	0.780611	0.616312	0.988708	0.0399616	0.910178	0.0284209	UP	Ainsliadimer A	RPS14|208645_s_at	-0.596915	0.0106936
CCT2	1.27593	1.00278	1.62349	0.0474168	-0.530121	0.0395902	DR	Ainsliadimer A	CCT2|201946_s_at	1.61239	1.28072e-07
SERPINB9	0.836411	0.720185	0.971394	0.0192749	-0.713131	0.0156784	DP	Ainsliadimer A	SERPINB9|209723_at	-1.11024	0.0391687
TLN2	0.833613	0.695783	0.998745	0.0484298	-0.927363	0.00221108	DP	Ainsliadimer A	TLN2|212701_at	-1.12261	0.039108
RASGRP1	0.897784	0.817382	0.986095	0.0242915	1.59482	0.0431577	UP	Ainsliadimer A	RASGRP1|205590_at	-2.4309	0.00222451
PSMD1	1.57189	1.08944	2.26799	0.015608	-0.720859	0.0182201	DR	Ainsliadimer A	PSMD1|201198_s_at	0.923436	0.00617023
CALML3	0.926957	0.880579	0.975777	0.00377577	1.16309	0.0187678	UP	Ainsliadimer A	CALML3|210020_x_at	-0.603972	0.016652
EGR3	0.887756	0.813796	0.968438	0.00730609	1.48483	0.0198331	UP	Ainsliadimer A	EGR3|206115_at	1.08246	0.0134347
SIAH2	0.759912	0.646104	0.893767	0.000910778	0.720591	0.0280097	UP	Ainsliadimer A	SIAH2|209339_at	1.44328	0.00376222
TNFAIP2	0.849121	0.730359	0.987194	0.0333676	1.92497	0.00253009	UP	Ainsliadimer A	TNFAIP2|202510_s_at	-1.61312	0.0207142
IFITM1	0.887122	0.790355	0.995736	0.0421059	1.82296	0.00450551	UP	Ainsliadimer A	IFITM1|201601_x_at	-0.508634	0.032973
IFITM1	0.887122	0.790355	0.995736	0.0421059	1.82296	0.00450551	UP	Ainsliadimer A	IFITM1|214022_s_at	-0.94019	0.0208525
WWOX	1.25767	1.09301	1.44713	0.00136392	1.17696	0.009425	UR	Ainsliadimer A	WWOX|219077_s_at	-0.883085	0.0439131
EIF4EBP1	1.16139	1.01819	1.32474	0.0258554	0.783759	0.0129625	UR	Ainsliadimer A	EIF4EBP1|221539_at	0.697643	0.0230498
SERPINA1	0.833568	0.762578	0.911167	6.11255e-05	1.83109	0.0415314	UP	Ainsliadimer A	SERPINA1|202833_s_at	1.04297	0.00107172
SERPINA1	0.833568	0.762578	0.911167	6.11255e-05	1.83109	0.0415314	UP	Ainsliadimer A	SERPINA1|211428_at	3.4691	0.00522091
SERPINA1	0.833568	0.762578	0.911167	6.11255e-05	1.83109	0.0415314	UP	Ainsliadimer A	SERPINA1|211429_s_at	1.59362	0.0103701
FAM114A1	1.31171	1.06252	1.61934	0.0115988	0.684411	0.00359831	UR	Ainsliadimer A	FAM114A1|213455_at	-0.598467	0.0305298
PCDHGA1	1.1412	1.03674	1.25619	0.00700487	-1.31641	0.0142935	DR	Ainsliadimer A	PCDHGA1|211066_x_at	-0.519012	0.0493954
ERCC1	0.668625	0.495232	0.902727	0.00858632	0.798187	0.036459	UP	Hyperoside	ERCC1|203720_s_at	0.601894	0.0111848
PEX3	1.38991	1.0576	1.82663	0.0181907	-0.663254	0.0311167	DR	Hyperoside	PEX3|203969_at	-1.11113	0.00254191
TRAF1	0.800699	0.69158	0.927034	0.00294374	1.69095	0.00982732	UP	Hyperoside	TRAF1|205599_at	-1.21997	0.0202773
SYT1	0.935468	0.883442	0.990557	0.0223158	0.702441	0.0227156	UP	Hyperoside	SYT1|203998_s_at	0.766946	0.0177278
HSP90AA1	1.45205	1.16126	1.81567	0.00107115	-0.837049	0.012135	DR	Hyperoside	HSP90AA1|210211_s_at	-0.500708	0.00664263
HSP90AA1	1.45205	1.16126	1.81567	0.00107115	-0.837049	0.012135	DR	Hyperoside	HSP90AA1|214328_s_at	-0.520008	0.00853769
SQLE	1.17109	1.01247	1.35455	0.0334286	-1.23331	0.00275383	DR	Hyperoside	SQLE|213562_s_at	1.0545	0.0350614
SQLE	1.17109	1.01247	1.35455	0.0334286	-1.23331	0.00275383	DR	Hyperoside	SQLE|213577_at	0.774398	0.00881767
TFPI2	0.863383	0.80825	0.922277	1.28211e-05	-2.19854	0.0243707	DP	Hyperoside	TFPI2|209278_s_at	0.79501	0.0162671
B9D1	0.814768	0.681996	0.973389	0.023999	0.871076	0.00170412	UP	Hyperoside	B9D1|205662_at	0.749251	0.0134454
B9D1	0.814768	0.681996	0.973389	0.023999	0.871076	0.00170412	UP	Hyperoside	B9D1|210534_s_at	0.869542	0.0087942
LIFR	0.851201	0.755113	0.959516	0.00838425	-0.619908	0.0155398	DP	Hyperoside	LIFR|205876_at	1.14528	0.0123431
SMAD5	1.3837	1.03898	1.84279	0.0263165	0.899666	9.29624e-05	UR	Hyperoside	SMAD5|205187_at	1.35177	0.00721062
SMAD5	1.3837	1.03898	1.84279	0.0263165	0.899666	9.29624e-05	UR	Hyperoside	SMAD5|205188_s_at	1.776	0.0354097
NKTR	0.782871	0.613967	0.998241	0.0483634	-0.857731	0.029324	DP	Hyperoside	NKTR|215338_s_at	0.740568	0.0211494
GBP1	0.870173	0.779125	0.971861	0.0136581	1.76729	0.0118094	UP	Hyperoside	GBP1|202270_at	2.88961	0.0178237
HSPH1	1.29343	1.05363	1.5878	0.0139213	-1.18808	0.00799231	DR	Hyperoside	HSPH1|206976_s_at	-0.677117	0.0014278
HSPH1	1.29343	1.05363	1.5878	0.0139213	-1.18808	0.00799231	DR	Hyperoside	HSPH1|208744_x_at	1.20661	0.0100631
RPL5	0.677671	0.529342	0.867563	0.00202079	0.595441	0.0299195	UP	Hyperoside	RPL5|210034_s_at	-0.826431	0.00796371
STAT5A	0.806238	0.674271	0.964033	0.018196	0.731619	0.0243399	UP	Hyperoside	STAT5A|203010_at	1.48482	0.0175601
PTPN22	0.887953	0.794392	0.992533	0.036448	-0.765346	0.00689782	DP	Hyperoside	PTPN22|208010_s_at	-1.20935	0.0149456
HNRNPA1	0.637302	0.448911	0.904754	0.0117421	0.573658	0.0153167	UP	Hyperoside	HNRNPA1|222040_at	0.686902	0.0445607
RDX	1.24084	1.0063	1.53003	0.0435123	2.1846	0.00762614	UR	Hyperoside	RDX|204969_s_at	0.624121	0.012284
RDX	1.24084	1.0063	1.53003	0.0435123	2.1846	0.00762614	UR	Hyperoside	RDX|212398_at	1.0884	0.0143645
SLC39A8	0.836641	0.721053	0.970758	0.0187137	-1.11532	0.0210013	DP	Hyperoside	SLC39A8|209267_s_at	0.51179	0.00224446
OSBPL1A	0.759189	0.624002	0.923664	0.00589396	-1.06865	0.00331599	DP	Hyperoside	OSBPL1A|209485_s_at	-0.518836	0.0305166
PMAIP1	0.851132	0.758668	0.954864	0.00601239	1.99112	0.0240982	UP	Hyperoside	PMAIP1|204286_s_at	-0.707645	0.0223082
RPS11	0.712567	0.558205	0.909614	0.0065188	0.547105	0.0485921	UP	Hyperoside	RPS11|213350_at	-2.51999	0.00125987
NTRK2	0.902823	0.831126	0.980706	0.0154597	1.26225	0.00347418	UP	Hyperoside	NTRK2|207152_at	2.83364	0.00130774
PDCD4	0.809773	0.700083	0.93665	0.00449418	0.806707	0.0418405	UP	Hyperoside	PDCD4|212594_at	-0.644017	0.0372921
LSS	1.27938	1.01217	1.61715	0.0392893	-0.801765	0.00818827	DR	Hyperoside	LSS|211019_s_at	1.00177	0.0366737
NPY1R	0.929391	0.885143	0.975851	0.00325952	2.8446	0.032752	UP	Hyperoside	NPY1R|205440_s_at	0.756892	0.0352521
STK17A	0.720604	0.565252	0.918653	0.00817336	-0.517328	0.0315696	DP	Hyperoside	STK17A|202694_at	1.07855	0.0105848
CCT2	1.27593	1.00278	1.62349	0.0474168	-0.530121	0.0395902	DR	Hyperoside	CCT2|201946_s_at	1.08826	5.32051e-05
ATF5	0.791604	0.628565	0.996931	0.0470238	-0.61731	0.00214719	DP	Hyperoside	ATF5|204999_s_at	1.09706	0.0220309
AZU1	0.9162	0.839788	0.999564	0.048864	0.835229	0.0284523	UP	Hyperoside	AZU1|214575_s_at	3.07211	0.0141066
DTX3	0.778381	0.643912	0.94093	0.00962017	0.61891	0.0301964	UP	Hyperoside	DTX3|49051_g_at	-3.30231	0.00191432
EGR3	0.887756	0.813796	0.968438	0.00730609	1.48483	0.0198331	UP	Hyperoside	EGR3|206115_at	0.857428	0.0124591
SIAH2	0.759912	0.646104	0.893767	0.000910778	0.720591	0.0280097	UP	Hyperoside	SIAH2|209339_at	1.04917	0.00458548
WWOX	1.25767	1.09301	1.44713	0.00136392	1.17696	0.009425	UR	Hyperoside	WWOX|210695_s_at	0.60978	0.00626308
MST1P2	0.891528	0.796883	0.997415	0.0449446	0.69918	0.0239207	UP	Hyperoside	MST1P2|213380_x_at	0.612033	0.0121862
ZNF75D	1.46618	1.08796	1.97589	0.0119444	0.568738	0.0131017	UR	Hyperoside	ZNF75D|214813_at	0.707693	0.0343886
EMID1	0.89492	0.816188	0.981248	0.018135	1.00239	0.0289249	UP	Hyperoside	EMID1|213779_at	1.0703	0.0451576
SERPINA1	0.833568	0.762578	0.911167	6.11255e-05	1.83109	0.0415314	UP	Hyperoside	SERPINA1|211428_at	3.06676	0.00730745
RGL3	0.911448	0.848142	0.97948	0.0115873	3.43248	0.000766773	UP	Hyperoside	RGL3|215054_at	1.03104	0.037529
EPHA3	1.11391	1.01466	1.22286	0.0234721	-4.01851	0.000843956	DR	Glycyrrhizic acid	EPHA3|206071_s_at	-2.47184	0.00770571
PARP12	0.715433	0.571411	0.895755	0.00350166	0.935067	0.0232261	UP	Glycyrrhizic acid	PARP12|218543_s_at	-0.760782	0.0102836
SQLE	1.17109	1.01247	1.35455	0.0334286	-1.23331	0.00275383	DR	Glycyrrhizic acid	SQLE|213562_s_at	1.2926	0.0109723
LIFR	0.851201	0.755113	0.959516	0.00838425	-0.619908	0.0155398	DP	Glycyrrhizic acid	LIFR|205876_at	1.59794	0.00134315
HSPH1	1.29343	1.05363	1.5878	0.0139213	-1.18808	0.00799231	DR	Glycyrrhizic acid	HSPH1|208744_x_at	0.762217	0.0188519
STAT5A	0.806238	0.674271	0.964033	0.018196	0.731619	0.0243399	UP	Glycyrrhizic acid	STAT5A|203010_at	1.65768	0.000994077
HNRNPA1	0.637302	0.448911	0.904754	0.0117421	0.573658	0.0153167	UP	Glycyrrhizic acid	HNRNPA1|222040_at	0.756256	0.00542271
REPS1	1.55073	1.16259	2.06846	0.00283656	-0.580046	0.0092244	DR	Glycyrrhizic acid	REPS1|215201_at	-1.05151	0.0349298
CYP1B1	0.884614	0.791722	0.988405	0.0303113	-0.793976	0.0081546	DP	Glycyrrhizic acid	CYP1B1|202436_s_at	-0.51089	0.0143761
CYP1B1	0.884614	0.791722	0.988405	0.0303113	-0.793976	0.0081546	DP	Glycyrrhizic acid	CYP1B1|202437_s_at	-0.556242	0.0220151
C1RL	0.695877	0.557111	0.869207	0.00139717	1.65538	0.0132295	UP	Glycyrrhizic acid	C1RL|218983_at	2.76609	0.0185162
RPS11	0.712567	0.558205	0.909614	0.0065188	0.547105	0.0485921	UP	Glycyrrhizic acid	RPS11|213350_at	-2.23695	0.00371315
NTRK2	0.902823	0.831126	0.980706	0.0154597	1.26225	0.00347418	UP	Glycyrrhizic acid	NTRK2|207152_at	3.06508	0.000149112
PDCD4	0.809773	0.700083	0.93665	0.00449418	0.806707	0.0418405	UP	Glycyrrhizic acid	PDCD4|202731_at	0.895851	0.0436606
ZFP36L2	0.83299	0.698995	0.99267	0.0411334	1.21225	0.00710625	UP	Glycyrrhizic acid	ZFP36L2|201367_s_at	3.1337	0.00561583
CCT2	1.27593	1.00278	1.62349	0.0474168	-0.530121	0.0395902	DR	Glycyrrhizic acid	CCT2|201946_s_at	1.14708	0.000669745
TCTN2	0.788816	0.640573	0.971365	0.0255159	1.35085	0.000627153	UP	Glycyrrhizic acid	TCTN2|206438_x_at	0.545738	0.0381842
ATF5	0.791604	0.628565	0.996931	0.0470238	-0.61731	0.00214719	DP	Glycyrrhizic acid	ATF5|204999_s_at	0.641552	0.00145697
TP53I11	1.31094	1.04761	1.64047	0.0179584	0.623038	0.0143908	UR	Glycyrrhizic acid	TP53I11|214667_s_at	1.6536	0.0324755
DTX3	0.778381	0.643912	0.94093	0.00962017	0.61891	0.0301964	UP	Glycyrrhizic acid	DTX3|49051_g_at	-1.06712	0.0264716
EGR3	0.887756	0.813796	0.968438	0.00730609	1.48483	0.0198331	UP	Glycyrrhizic acid	EGR3|206115_at	0.633964	0.00487484
SIAH2	0.759912	0.646104	0.893767	0.000910778	0.720591	0.0280097	UP	Glycyrrhizic acid	SIAH2|209339_at	0.964463	0.000674922
MST1P2	0.891528	0.796883	0.997415	0.0449446	0.69918	0.0239207	UP	Glycyrrhizic acid	MST1P2|213380_x_at	0.845206	0.00472557
ZNF75D	1.46618	1.08796	1.97589	0.0119444	0.568738	0.0131017	UR	Glycyrrhizic acid	ZNF75D|214813_at	0.767257	0.00199905
SERPINA1	0.833568	0.762578	0.911167	6.11255e-05	1.83109	0.0415314	UP	Glycyrrhizic acid	SERPINA1|211429_s_at	1.20239	0.041805
PSMB8	0.751621	0.644645	0.876348	0.000267431	1.12335	0.0133008	UP	Glycyrrhizic acid	PSMB8|209040_s_at	-1.44641	0.0253836
MYO15B	0.865686	0.770419	0.972733	0.01532	0.936001	0.0447864	UP	Glycyrrhizic acid	MYO15B|59375_at	0.971253	0.0426486
MATK	0.879911	0.805265	0.961475	0.00467567	0.632765	0.0277852	UP	Oridonin	MATK|206267_s_at	-0.611967	0.0395546
RABGAP1	1.56255	1.09185	2.23618	0.0146684	0.658677	0.00365847	UR	Oridonin	RABGAP1|204028_s_at	-0.82351	0.0280405
ERCC1	0.668625	0.495232	0.902727	0.00858632	0.798187	0.036459	UP	Oridonin	ERCC1|203720_s_at	0.553408	0.0321772
PEX3	1.38991	1.0576	1.82663	0.0181907	-0.663254	0.0311167	DR	Oridonin	PEX3|203970_s_at	-0.562706	0.0302318
CYBA	0.856253	0.754196	0.972119	0.0165452	3.09865	0.00618658	UP	Oridonin	CYBA|203028_s_at	0.574016	0.000650302
SYT1	0.935468	0.883442	0.990557	0.0223158	0.702441	0.0227156	UP	Oridonin	SYT1|203998_s_at	-1.56911	0.0240368
ATP6AP1	1.31326	1.0099	1.70775	0.0420083	-0.603343	0.0143174	DR	Oridonin	ATP6AP1|207809_s_at	0.659478	0.00779219
TP63	0.895433	0.835731	0.959399	0.00170513	2.45926	0.00352212	UP	Oridonin	TP63|209863_s_at	-0.500182	0.0412475
HSP90AA1	1.45205	1.16126	1.81567	0.00107115	-0.837049	0.012135	DR	Oridonin	HSP90AA1|211968_s_at	1.33383	0.00407632
SQLE	1.17109	1.01247	1.35455	0.0334286	-1.23331	0.00275383	DR	Oridonin	SQLE|213562_s_at	1.6126	0.015561
SQLE	1.17109	1.01247	1.35455	0.0334286	-1.23331	0.00275383	DR	Oridonin	SQLE|213577_at	-0.607472	0.012904
TFPI2	0.863383	0.80825	0.922277	1.28211e-05	-2.19854	0.0243707	DP	Oridonin	TFPI2|209277_at	-1.72773	0.0403929
TFPI2	0.863383	0.80825	0.922277	1.28211e-05	-2.19854	0.0243707	DP	Oridonin	TFPI2|209278_s_at	-1.51376	0.0024864
LIFR	0.851201	0.755113	0.959516	0.00838425	-0.619908	0.0155398	DP	Oridonin	LIFR|205876_at	1.65077	0.0107996
IFT57	0.734906	0.573439	0.941837	0.0149593	0.737613	0.0222441	UP	Oridonin	IFT57|218100_s_at	-0.547331	0.000325064
NKTR	0.782871	0.613967	0.998241	0.0483634	-0.857731	0.029324	DP	Oridonin	NKTR|202379_s_at	-0.624805	0.027989
NFE2	0.837903	0.760061	0.923719	0.000378044	0.95057	0.0197538	UP	Oridonin	NFE2|209930_s_at	3.46493	0.0281278
CDKN1C	0.85026	0.741928	0.974409	0.0196601	2.51059	0.00922802	UP	Oridonin	CDKN1C|216894_x_at	-2.9623	0.00558984
BST2	0.902419	0.815255	0.998902	0.0475742	1.43158	0.00292765	UP	Oridonin	BST2|201641_at	-1.8482	0.00155449
BTG1	0.729839	0.584047	0.912023	0.00560682	1.13706	0.0217191	UP	Oridonin	BTG1|200921_s_at	-0.618317	0.041234
CCNJL	0.886932	0.792788	0.992256	0.0361041	2.20658	8.20633e-05	UP	Oridonin	CCNJL|219227_at	-0.741528	0.0376674
HNRNPA1	0.637302	0.448911	0.904754	0.0117421	0.573658	0.0153167	UP	Oridonin	HNRNPA1|221919_at	0.912843	0.000448605
BLK	0.899584	0.831928	0.972741	0.00798361	2.5648	0.000809085	UP	Oridonin	BLK|210934_at	3.75607	0.0403141
CNPY3	0.743482	0.569517	0.970585	0.0292949	-0.5073	0.0165277	DP	Oridonin	CNPY3|217931_at	0.917408	0.0417606
RDX	1.24084	1.0063	1.53003	0.0435123	2.1846	0.00762614	UR	Oridonin	RDX|204969_s_at	-0.807593	0.0352414
RDX	1.24084	1.0063	1.53003	0.0435123	2.1846	0.00762614	UR	Oridonin	RDX|212397_at	-0.577942	0.00629997
CYP1B1	0.884614	0.791722	0.988405	0.0303113	-0.793976	0.0081546	DP	Oridonin	CYP1B1|202435_s_at	-0.670346	0.00606362
CYP1B1	0.884614	0.791722	0.988405	0.0303113	-0.793976	0.0081546	DP	Oridonin	CYP1B1|202436_s_at	-0.639545	0.0113409
SLC39A8	0.836641	0.721053	0.970758	0.0187137	-1.11532	0.0210013	DP	Oridonin	SLC39A8|209266_s_at	-2.05183	0.0247469
RPS11	0.712567	0.558205	0.909614	0.0065188	0.547105	0.0485921	UP	Oridonin	RPS11|213350_at	-2.1814	0.00449345
NTRK2	0.902823	0.831126	0.980706	0.0154597	1.26225	0.00347418	UP	Oridonin	NTRK2|207152_at	3.26549	0.00091428
PAK1	0.778242	0.632695	0.957271	0.0176278	1.44611	0.0053251	UP	Oridonin	PAK1|209615_s_at	0.594009	0.0234204
PDCD4	0.809773	0.700083	0.93665	0.00449418	0.806707	0.0418405	UP	Oridonin	PDCD4|202731_at	1.14272	0.0227063
ZFP36L2	0.83299	0.698995	0.99267	0.0411334	1.21225	0.00710625	UP	Oridonin	ZFP36L2|201368_at	-0.761846	0.00334002
NPY1R	0.929391	0.885143	0.975851	0.00325952	2.8446	0.032752	UP	Oridonin	NPY1R|205440_s_at	-1.22636	0.0428063
CCT2	1.27593	1.00278	1.62349	0.0474168	-0.530121	0.0395902	DR	Oridonin	CCT2|201946_s_at	1.37556	2.43053e-06
TCTN2	0.788816	0.640573	0.971365	0.0255159	1.35085	0.000627153	UP	Oridonin	TCTN2|206438_x_at	0.704876	0.0255881
RASGRP1	0.897784	0.817382	0.986095	0.0242915	1.59482	0.0431577	UP	Oridonin	RASGRP1|205590_at	-2.02239	0.00488765
SCUBE2	0.945437	0.898299	0.995048	0.0315401	-1.15654	0.00740076	DP	Oridonin	SCUBE2|219197_s_at	0.648181	0.00271229
NDUFAF3	0.794521	0.631881	0.999023	0.0490307	-0.707824	0.0087317	DP	Oridonin	NDUFAF3|209177_at	0.769263	0.00244331
EGR3	0.887756	0.813796	0.968438	0.00730609	1.48483	0.0198331	UP	Oridonin	EGR3|206115_at	1.04716	0.00783797
SIAH2	0.759912	0.646104	0.893767	0.000910778	0.720591	0.0280097	UP	Oridonin	SIAH2|209339_at	1.1149	0.00550341
TNFAIP2	0.849121	0.730359	0.987194	0.0333676	1.92497	0.00253009	UP	Oridonin	TNFAIP2|202509_s_at	-3.76403	0.0165831
IFITM1	0.887122	0.790355	0.995736	0.0421059	1.82296	0.00450551	UP	Oridonin	IFITM1|214022_s_at	-0.694104	0.00423917
EIF4EBP1	1.16139	1.01819	1.32474	0.0258554	0.783759	0.0129625	UR	Oridonin	EIF4EBP1|221539_at	0.76137	0.0185211
SERPINA1	0.833568	0.762578	0.911167	6.11255e-05	1.83109	0.0415314	UP	Oridonin	SERPINA1|202833_s_at	1.37403	0.0130699
SERPINA1	0.833568	0.762578	0.911167	6.11255e-05	1.83109	0.0415314	UP	Oridonin	SERPINA1|211429_s_at	1.97503	0.000616253
FAM114A1	1.31171	1.06252	1.61934	0.0115988	0.684411	0.00359831	UR	Oridonin	FAM114A1|213455_at	-0.577066	0.0407761
MICB	0.867332	0.760993	0.988531	0.0329394	-2.30236	0.00351529	DP	Oridonin	MICB|206247_at	0.892162	0.0359847
RGL3	0.911448	0.848142	0.97948	0.0115873	3.43248	0.000766773	UP	Oridonin	RGL3|215054_at	1.065	0.0417047
CYP24A1	0.868571	0.79927	0.943881	0.000895906	4.50911	0.00626847	UP	Britanin	CYP24A1|206504_at	-1.36514	0.00720978
PEX3	1.38991	1.0576	1.82663	0.0181907	-0.663254	0.0311167	DR	Britanin	PEX3|203972_s_at	-0.849785	0.00496651
PARP12	0.715433	0.571411	0.895755	0.00350166	0.935067	0.0232261	UP	Britanin	PARP12|218543_s_at	-1.35814	0.0391977
SYT1	0.935468	0.883442	0.990557	0.0223158	0.702441	0.0227156	UP	Britanin	SYT1|203998_s_at	-1.2129	0.0145205
SYT1	0.935468	0.883442	0.990557	0.0223158	0.702441	0.0227156	UP	Britanin	SYT1|203999_at	-0.845662	0.0165874
IFI35	0.843555	0.72589	0.980293	0.0264428	0.895068	0.0231157	UP	Britanin	IFI35|209417_s_at	-0.819435	0.038575
HLTF	1.2466	1.00909	1.54001	0.040966	0.644181	0.00273835	UR	Britanin	HLTF|202983_at	-0.866277	0.00145544
TP63	0.895433	0.835731	0.959399	0.00170513	2.45926	0.00352212	UP	Britanin	TP63|209863_s_at	-0.943353	0.0107521
SDHA	1.39579	1.0287	1.89387	0.0322159	0.56835	0.00579423	UR	Britanin	SDHA|201093_x_at	-0.554793	0.000194326
HSP90AA1	1.45205	1.16126	1.81567	0.00107115	-0.837049	0.012135	DR	Britanin	HSP90AA1|211968_s_at	0.824113	0.0138827
CADM4	0.827547	0.714254	0.95881	0.0117384	1.13849	0.00103286	UP	Britanin	CADM4|214267_s_at	-3.58462	0.0387851
TFPI2	0.863383	0.80825	0.922277	1.28211e-05	-2.19854	0.0243707	DP	Britanin	TFPI2|209278_s_at	0.606516	0.00672398
CHORDC1	1.35337	1.08461	1.68874	0.00738307	-0.766173	0.00656369	DR	Britanin	CHORDC1|218566_s_at	0.538453	0.0370631
SMAD5	1.3837	1.03898	1.84279	0.0263165	0.899666	9.29624e-05	UR	Britanin	SMAD5|205188_s_at	1.12736	0.0100862
IFT57	0.734906	0.573439	0.941837	0.0149593	0.737613	0.0222441	UP	Britanin	IFT57|218100_s_at	0.721397	0.010992
HSPH1	1.29343	1.05363	1.5878	0.0139213	-1.18808	0.00799231	DR	Britanin	HSPH1|206976_s_at	0.600625	0.014187
HSPH1	1.29343	1.05363	1.5878	0.0139213	-1.18808	0.00799231	DR	Britanin	HSPH1|208744_x_at	1.25908	0.0441908
COPS5	1.46144	1.11614	1.91357	0.00579982	-0.507308	0.0176326	DR	Britanin	COPS5|201652_at	-0.550213	0.00489372
STAT5A	0.806238	0.674271	0.964033	0.018196	0.731619	0.0243399	UP	Britanin	STAT5A|203010_at	1.53913	0.0056751
CDKN1C	0.85026	0.741928	0.974409	0.0196601	2.51059	0.00922802	UP	Britanin	CDKN1C|216894_x_at	-2.66525	0.00647125
RAP1GAP2	1.19803	1.0307	1.39253	0.0185795	0.650543	0.00448637	UR	Britanin	RAP1GAP2|213280_at	-0.955064	0.0145495
CCNA1	0.847772	0.765215	0.939235	0.00158196	1.18635	0.019463	UP	Britanin	CCNA1|205899_at	3.11689	0.0101093
MKRN1	0.627527	0.413044	0.953386	0.0289867	0.694995	0.00691524	UP	Britanin	MKRN1|201285_at	0.565322	0.0127111
ZFC3H1	1.39418	1.07737	1.80416	0.0115185	0.542347	0.0107448	UR	Britanin	ZFC3H1|213065_at	-0.964058	0.0265692
HNRNPA1	0.637302	0.448911	0.904754	0.0117421	0.573658	0.0153167	UP	Britanin	HNRNPA1|200016_x_at	-0.505974	0.0260986
HNRNPA1	0.637302	0.448911	0.904754	0.0117421	0.573658	0.0153167	UP	Britanin	HNRNPA1|213356_x_at	-0.553795	0.0181576
HNRNPA1	0.637302	0.448911	0.904754	0.0117421	0.573658	0.0153167	UP	Britanin	HNRNPA1|221919_at	-0.816371	0.0009971
RDX	1.24084	1.0063	1.53003	0.0435123	2.1846	0.00762614	UR	Britanin	RDX|204969_s_at	-1.1441	0.0167069
RDX	1.24084	1.0063	1.53003	0.0435123	2.1846	0.00762614	UR	Britanin	RDX|212397_at	-0.720805	0.00702924
RDX	1.24084	1.0063	1.53003	0.0435123	2.1846	0.00762614	UR	Britanin	RDX|212398_at	-1.144	0.00982959
PMAIP1	0.851132	0.758668	0.954864	0.00601239	1.99112	0.0240982	UP	Britanin	PMAIP1|204286_s_at	-0.522427	0.0138091
RPS11	0.712567	0.558205	0.909614	0.0065188	0.547105	0.0485921	UP	Britanin	RPS11|213350_at	-0.782898	0.0380097
RFX5	0.742611	0.560088	0.984615	0.038669	0.96646	0.00638029	UP	Britanin	RFX5|202963_at	-1.87734	0.00656257
RFX5	0.742611	0.560088	0.984615	0.038669	0.96646	0.00638029	UP	Britanin	RFX5|202964_s_at	-1.41817	0.0471418
TNFAIP8	0.793556	0.658078	0.956926	0.0154803	1.1739	0.00583217	UP	Britanin	TNFAIP8|210260_s_at	-0.918633	0.00977423
NTRK2	0.902823	0.831126	0.980706	0.0154597	1.26225	0.00347418	UP	Britanin	NTRK2|207152_at	3.25675	0.00215729
NTRK2	0.902823	0.831126	0.980706	0.0154597	1.26225	0.00347418	UP	Britanin	NTRK2|221796_at	-0.874163	0.0444484
C11orf49	0.750902	0.58503	0.963803	0.0244836	0.741324	0.00532389	UP	Britanin	C11orf49|203257_s_at	-1.02746	0.0185071
ACSL1	1.14576	1.00279	1.30912	0.0454038	0.692807	0.0392709	UR	Britanin	ACSL1|201963_at	1.48886	0.00547149
CABYR	0.821544	0.713662	0.945735	0.00620507	-0.731189	0.0150192	DP	Britanin	CABYR|219928_s_at	0.651006	0.0341495
TMPRSS3	0.94109	0.887447	0.997975	0.0425951	0.869182	0.00604686	UP	Britanin	TMPRSS3|220177_s_at	-0.766649	0.000188338
NPY1R	0.929391	0.885143	0.975851	0.00325952	2.8446	0.032752	UP	Britanin	NPY1R|205440_s_at	-0.733863	0.00234038
STK17A	0.720604	0.565252	0.918653	0.00817336	-0.517328	0.0315696	DP	Britanin	STK17A|202693_s_at	0.626357	0.0296902
FAM111A	0.700654	0.558797	0.878522	0.00205594	-0.887873	0.0020523	DP	Britanin	FAM111A|218248_at	-0.847325	0.0175261
AZU1	0.9162	0.839788	0.999564	0.048864	0.835229	0.0284523	UP	Britanin	AZU1|214575_s_at	3.09637	0.0240458
RASGRP1	0.897784	0.817382	0.986095	0.0242915	1.59482	0.0431577	UP	Britanin	RASGRP1|205590_at	-1.08687	0.033552
MYD88	0.66317	0.478391	0.919319	0.0137094	-0.638584	0.00281059	DP	Britanin	MYD88|209124_at	-0.533426	0.0161543
CCDC106	0.83952	0.718383	0.981084	0.0277947	-1.45037	0.0193281	DP	Britanin	CCDC106|207006_s_at	0.685142	0.0351949
FAM131A	0.750821	0.58701	0.960346	0.0224792	-3.86772	0.00427204	DP	Britanin	FAM131A|221904_at	0.955883	0.0271226
TP53I11	1.31094	1.04761	1.64047	0.0179584	0.623038	0.0143908	UR	Britanin	TP53I11|203421_at	0.891348	0.0445456
TP53I11	1.31094	1.04761	1.64047	0.0179584	0.623038	0.0143908	UR	Britanin	TP53I11|216919_at	2.29437	0.00459508
ARL4D	0.862721	0.752914	0.988543	0.0335147	2.86442	0.00170836	UP	Britanin	ARL4D|203587_at	-1.07628	0.0300252
NDUFAF3	0.794521	0.631881	0.999023	0.0490307	-0.707824	0.0087317	DP	Britanin	NDUFAF3|209177_at	-0.749405	0.00865874
EGR3	0.887756	0.813796	0.968438	0.00730609	1.48483	0.0198331	UP	Britanin	EGR3|206115_at	-0.796029	0.0121968
SIAH2	0.759912	0.646104	0.893767	0.000910778	0.720591	0.0280097	UP	Britanin	SIAH2|209339_at	0.885208	0.0115328
IFITM1	0.887122	0.790355	0.995736	0.0421059	1.82296	0.00450551	UP	Britanin	IFITM1|201601_x_at	-0.813184	0.00959851
IFITM1	0.887122	0.790355	0.995736	0.0421059	1.82296	0.00450551	UP	Britanin	IFITM1|214022_s_at	-1.01254	0.00141301
WWOX	1.25767	1.09301	1.44713	0.00136392	1.17696	0.009425	UR	Britanin	WWOX|210695_s_at	1.29993	0.0030754
WWOX	1.25767	1.09301	1.44713	0.00136392	1.17696	0.009425	UR	Britanin	WWOX|219077_s_at	1.68954	0.0117981
EIF4EBP1	1.16139	1.01819	1.32474	0.0258554	0.783759	0.0129625	UR	Britanin	EIF4EBP1|221539_at	0.963328	0.0399965
SERPINA1	0.833568	0.762578	0.911167	6.11255e-05	1.83109	0.0415314	UP	Britanin	SERPINA1|202833_s_at	-2.03768	0.0230337
LIME1	0.874153	0.786964	0.971001	0.012111	-0.527166	0.0479711	DP	Britanin	LIME1|57539_at	0.848561	0.0366027
APOM	0.841745	0.728689	0.972342	0.0192265	0.968185	0.0210961	UP	Britanin	APOM|205682_x_at	0.546669	0.0440383
MICB	0.867332	0.760993	0.988531	0.0329394	-2.30236	0.00351529	DP	Britanin	MICB|206247_at	1.2211	0.0113916
CHMP4A	0.661593	0.516539	0.84738	0.00107012	-0.687267	0.00761658	DP	Britanin	CHMP4A|218571_s_at	-0.990069	0.00202831
CHMP4A	0.661593	0.516539	0.84738	0.00107012	-0.687267	0.00761658	DP	Britanin	CHMP4A|218572_at	-0.943073	0.00177231
EPHA3	1.11391	1.01466	1.22286	0.0234721	-4.01851	0.000843956	DR	1棺-hydroxyalantolactone	EPHA3|206070_s_at	2.43604	0.0387756
HSP90AA1	1.45205	1.16126	1.81567	0.00107115	-0.837049	0.012135	DR	1棺-hydroxyalantolactone	HSP90AA1|210211_s_at	-0.605688	0.00711844
HSP90AA1	1.45205	1.16126	1.81567	0.00107115	-0.837049	0.012135	DR	1棺-hydroxyalantolactone	HSP90AA1|211968_s_at	-0.790623	0.0115065
HSP90AA1	1.45205	1.16126	1.81567	0.00107115	-0.837049	0.012135	DR	1棺-hydroxyalantolactone	HSP90AA1|211969_at	-0.712241	0.0194057
COCH	0.91741	0.853161	0.986497	0.0199673	1.52713	0.000356685	UP	1棺-hydroxyalantolactone	COCH|205229_s_at	-1.26755	0.0264679
ATG4A	1.7216	1.24298	2.38452	0.00108041	-0.659957	0.0306252	DR	1棺-hydroxyalantolactone	ATG4A|213115_at	0.560496	0.0174842
SGK3	0.845066	0.735876	0.970458	0.0170893	-1.17162	0.00602475	DP	1棺-hydroxyalantolactone	SGK3|220038_at	-1.73274	0.032835
ZFAND1	1.31591	1.02811	1.68426	0.0292472	0.886494	0.0112005	UR	1棺-hydroxyalantolactone	ZFAND1|218919_at	0.998026	0.00369939
SQLE	1.17109	1.01247	1.35455	0.0334286	-1.23331	0.00275383	DR	1棺-hydroxyalantolactone	SQLE|209218_at	-1.39197	0.00161392
SQLE	1.17109	1.01247	1.35455	0.0334286	-1.23331	0.00275383	DR	1棺-hydroxyalantolactone	SQLE|213562_s_at	-1.10456	0.0414279
SQLE	1.17109	1.01247	1.35455	0.0334286	-1.23331	0.00275383	DR	1棺-hydroxyalantolactone	SQLE|213577_at	-1.24007	0.00657389
B9D1	0.814768	0.681996	0.973389	0.023999	0.871076	0.00170412	UP	1棺-hydroxyalantolactone	B9D1|205662_at	0.594857	0.0149168
CHPT1	0.818919	0.707014	0.948537	0.00770526	-0.502848	0.0348998	DP	1棺-hydroxyalantolactone	CHPT1|221675_s_at	-0.531598	0.0182893
BACH2	0.889732	0.792249	0.999208	0.0484571	1.56354	0.00420312	UP	1棺-hydroxyalantolactone	BACH2|221234_s_at	0.555416	0.00768286
GPLD1	0.884538	0.786603	0.994666	0.0404339	0.842386	0.00994592	UP	1棺-hydroxyalantolactone	GPLD1|206265_s_at	-1.82592	0.0275099
GPLD1	0.884538	0.786603	0.994666	0.0404339	0.842386	0.00994592	UP	1棺-hydroxyalantolactone	GPLD1|215554_at	-1.55901	0.00849859
PCDHB3	1.10456	1.00519	1.21376	0.038674	-0.69544	0.00778209	DR	1棺-hydroxyalantolactone	PCDHB3|221410_x_at	-1.9352	0.00253969
SMAD5	1.3837	1.03898	1.84279	0.0263165	0.899666	9.29624e-05	UR	1棺-hydroxyalantolactone	SMAD5|205188_s_at	0.918388	0.00339199
IFT57	0.734906	0.573439	0.941837	0.0149593	0.737613	0.0222441	UP	1棺-hydroxyalantolactone	IFT57|218100_s_at	1.01586	0.00134074
NKTR	0.782871	0.613967	0.998241	0.0483634	-0.857731	0.029324	DP	1棺-hydroxyalantolactone	NKTR|215338_s_at	0.590267	0.0238176
GBP1	0.870173	0.779125	0.971861	0.0136581	1.76729	0.0118094	UP	1棺-hydroxyalantolactone	GBP1|202270_at	4.0709	0.00663119
STAT5A	0.806238	0.674271	0.964033	0.018196	0.731619	0.0243399	UP	1棺-hydroxyalantolactone	STAT5A|203010_at	1.61836	0.00205831
SGCE	0.883745	0.789227	0.989583	0.0322412	1.64272	0.00510119	UP	1棺-hydroxyalantolactone	SGCE|204688_at	1.38848	0.030853
BST2	0.902419	0.815255	0.998902	0.0475742	1.43158	0.00292765	UP	1棺-hydroxyalantolactone	BST2|201641_at	-5.41226	0.000196335
CCNA1	0.847772	0.765215	0.939235	0.00158196	1.18635	0.019463	UP	1棺-hydroxyalantolactone	CCNA1|205899_at	2.79537	0.0133777
MKRN1	0.627527	0.413044	0.953386	0.0289867	0.694995	0.00691524	UP	1棺-hydroxyalantolactone	MKRN1|209845_at	-1.39259	0.00113798
ZFC3H1	1.39418	1.07737	1.80416	0.0115185	0.542347	0.0107448	UR	1棺-hydroxyalantolactone	ZFC3H1|213065_at	-0.872648	0.00140522
HNRNPA1	0.637302	0.448911	0.904754	0.0117421	0.573658	0.0153167	UP	1棺-hydroxyalantolactone	HNRNPA1|221919_at	-0.583278	0.0232225
HNRNPA1	0.637302	0.448911	0.904754	0.0117421	0.573658	0.0153167	UP	1棺-hydroxyalantolactone	HNRNPA1|222040_at	0.62501	0.039978
REPS1	1.55073	1.16259	2.06846	0.00283656	-0.580046	0.0092244	DR	1棺-hydroxyalantolactone	REPS1|215922_at	-3.08667	0.0214811
CNPY3	0.743482	0.569517	0.970585	0.0292949	-0.5073	0.0165277	DP	1棺-hydroxyalantolactone	CNPY3|217931_at	-1.0475	0.010977
RDH16	1.11024	1.0195	1.20905	0.0162202	-0.87718	0.0361044	DR	1棺-hydroxyalantolactone	RDH16|206753_at	-3.66498	0.0140058
RPS11	0.712567	0.558205	0.909614	0.0065188	0.547105	0.0485921	UP	1棺-hydroxyalantolactone	RPS11|213350_at	-0.63776	0.0244599
TNFAIP8	0.793556	0.658078	0.956926	0.0154803	1.1739	0.00583217	UP	1棺-hydroxyalantolactone	TNFAIP8|208296_x_at	-0.555212	0.0237129
TNFAIP8	0.793556	0.658078	0.956926	0.0154803	1.1739	0.00583217	UP	1棺-hydroxyalantolactone	TNFAIP8|210260_s_at	-1.2491	0.00925629
NFKBIE	0.721325	0.583227	0.892123	0.00258886	-0.64969	0.0105279	DP	1棺-hydroxyalantolactone	NFKBIE|203927_at	1.14866	0.0235128
EPHA1	0.80861	0.660696	0.989638	0.0393015	1.24295	0.00121366	UP	1棺-hydroxyalantolactone	EPHA1|205977_s_at	-1.47171	0.0192689
C11orf49	0.750902	0.58503	0.963803	0.0244836	0.741324	0.00532389	UP	1棺-hydroxyalantolactone	C11orf49|203257_s_at	-0.644915	0.0245756
PDCD4	0.809773	0.700083	0.93665	0.00449418	0.806707	0.0418405	UP	1棺-hydroxyalantolactone	PDCD4|202730_s_at	-1.16061	0.0177213
PDCD4	0.809773	0.700083	0.93665	0.00449418	0.806707	0.0418405	UP	1棺-hydroxyalantolactone	PDCD4|202731_at	-0.901168	0.0368975
PDCD4	0.809773	0.700083	0.93665	0.00449418	0.806707	0.0418405	UP	1棺-hydroxyalantolactone	PDCD4|212593_s_at	-1.49466	0.00606412
PDCD4	0.809773	0.700083	0.93665	0.00449418	0.806707	0.0418405	UP	1棺-hydroxyalantolactone	PDCD4|212594_at	-0.645447	0.0336364
CABYR	0.821544	0.713662	0.945735	0.00620507	-0.731189	0.0150192	DP	1棺-hydroxyalantolactone	CABYR|219928_s_at	1.45183	0.024376
LSS	1.27938	1.01217	1.61715	0.0392893	-0.801765	0.00818827	DR	1棺-hydroxyalantolactone	LSS|202245_at	-1.21751	0.0425136
STK17A	0.720604	0.565252	0.918653	0.00817336	-0.517328	0.0315696	DP	1棺-hydroxyalantolactone	STK17A|202693_s_at	0.698496	0.0264792
STK17A	0.720604	0.565252	0.918653	0.00817336	-0.517328	0.0315696	DP	1棺-hydroxyalantolactone	STK17A|202694_at	1.34	0.039728
STK17A	0.720604	0.565252	0.918653	0.00817336	-0.517328	0.0315696	DP	1棺-hydroxyalantolactone	STK17A|202695_s_at	1.04321	0.0370858
CCT2	1.27593	1.00278	1.62349	0.0474168	-0.530121	0.0395902	DR	1棺-hydroxyalantolactone	CCT2|201946_s_at	0.500499	0.000260507
GNG4	0.90509	0.84173	0.973219	0.00708	2.79913	0.0395606	UP	1棺-hydroxyalantolactone	GNG4|205184_at	-0.888713	0.0313759
TLN2	0.833613	0.695783	0.998745	0.0484298	-0.927363	0.00221108	DP	1棺-hydroxyalantolactone	TLN2|212703_at	-2.6139	0.00931087
AZU1	0.9162	0.839788	0.999564	0.048864	0.835229	0.0284523	UP	1棺-hydroxyalantolactone	AZU1|214575_s_at	2.44859	0.0220102
CCDC106	0.83952	0.718383	0.981084	0.0277947	-1.45037	0.0193281	DP	1棺-hydroxyalantolactone	CCDC106|207006_s_at	-2.01695	0.0342667
FAM131A	0.750821	0.58701	0.960346	0.0224792	-3.86772	0.00427204	DP	1棺-hydroxyalantolactone	FAM131A|221904_at	0.832477	0.017443
SCUBE2	0.945437	0.898299	0.995048	0.0315401	-1.15654	0.00740076	DP	1棺-hydroxyalantolactone	SCUBE2|219197_s_at	-0.605587	0.00753365
UBA7	0.756256	0.645348	0.886224	0.000554958	0.903451	0.00232153	UP	1棺-hydroxyalantolactone	UBA7|1294_at	-2.66541	0.0336281
IFITM1	0.887122	0.790355	0.995736	0.0421059	1.82296	0.00450551	UP	1棺-hydroxyalantolactone	IFITM1|201601_x_at	-1.81969	0.00170829
IFITM1	0.887122	0.790355	0.995736	0.0421059	1.82296	0.00450551	UP	1棺-hydroxyalantolactone	IFITM1|214022_s_at	-1.80174	0.000292429
WWOX	1.25767	1.09301	1.44713	0.00136392	1.17696	0.009425	UR	1棺-hydroxyalantolactone	WWOX|210695_s_at	0.96896	0.00254371
WWOX	1.25767	1.09301	1.44713	0.00136392	1.17696	0.009425	UR	1棺-hydroxyalantolactone	WWOX|219077_s_at	1.31224	0.014071
FAM86B1	0.834618	0.731111	0.952779	0.00745096	0.546593	0.0220595	UP	1棺-hydroxyalantolactone	FAM86B1|65585_at	0.614576	0.00691379
CACNA1H	1.11228	1.03596	1.19422	0.0033459	0.722256	0.0129306	UR	1棺-hydroxyalantolactone	CACNA1H|205845_at	1.95698	0.00423332
SERPINA1	0.833568	0.762578	0.911167	6.11255e-05	1.83109	0.0415314	UP	1棺-hydroxyalantolactone	SERPINA1|202833_s_at	-4.05594	0.0270474
FAM114A1	1.31171	1.06252	1.61934	0.0115988	0.684411	0.00359831	UR	1棺-hydroxyalantolactone	FAM114A1|213455_at	-1.54922	0.00866164
MICB	0.867332	0.760993	0.988531	0.0329394	-2.30236	0.00351529	DP	1棺-hydroxyalantolactone	MICB|205905_s_at	-0.906493	0.0317435
MICB	0.867332	0.760993	0.988531	0.0329394	-2.30236	0.00351529	DP	1棺-hydroxyalantolactone	MICB|206247_at	-0.598941	0.0425151
PCDHGA1	1.1412	1.03674	1.25619	0.00700487	-1.31641	0.0142935	DR	1棺-hydroxyalantolactone	PCDHGA1|211066_x_at	-0.856823	0.0164284
CHMP4A	0.661593	0.516539	0.84738	0.00107012	-0.687267	0.00761658	DP	1棺-hydroxyalantolactone	CHMP4A|218572_at	0.593762	0.00533172
THTPA	0.786704	0.622502	0.994218	0.0445888	-0.500404	0.00768438	DP	1棺-hydroxyalantolactone	THTPA|218540_at	-1.04829	0.0393875
ERCC1	0.668625	0.495232	0.902727	0.00858632	0.798187	0.036459	UP	Japonicone A	ERCC1|203720_s_at	0.791901	0.0305704
PEX3	1.38991	1.0576	1.82663	0.0181907	-0.663254	0.0311167	DR	Japonicone A	PEX3|203969_at	-0.614357	0.0341032
PEX3	1.38991	1.0576	1.82663	0.0181907	-0.663254	0.0311167	DR	Japonicone A	PEX3|203970_s_at	-0.856793	0.0059014
PEX3	1.38991	1.0576	1.82663	0.0181907	-0.663254	0.0311167	DR	Japonicone A	PEX3|203972_s_at	-0.889712	0.00385326
ATP6V1H	1.4151	1.10445	1.81312	0.00604006	-0.647518	0.0045928	DR	Japonicone A	ATP6V1H|221504_s_at	0.934389	0.00438103
HLTF	1.2466	1.00909	1.54001	0.040966	0.644181	0.00273835	UR	Japonicone A	HLTF|202983_at	-1.67522	0.00105676
SDHA	1.39579	1.0287	1.89387	0.0322159	0.56835	0.00579423	UR	Japonicone A	SDHA|201093_x_at	-0.983323	0.0330429
HSP90AA1	1.45205	1.16126	1.81567	0.00107115	-0.837049	0.012135	DR	Japonicone A	HSP90AA1|210211_s_at	0.600939	0.00221869
HSP90AA1	1.45205	1.16126	1.81567	0.00107115	-0.837049	0.012135	DR	Japonicone A	HSP90AA1|211968_s_at	1.97654	0.00207251
OSTM1	1.48135	1.11133	1.97457	0.00736525	-0.882253	0.00389047	DR	Japonicone A	OSTM1|218196_at	0.658333	0.0168473
FLT3LG	0.818164	0.707507	0.946129	0.00679233	1.28055	0.000502653	UP	Japonicone A	FLT3LG|206980_s_at	1.29068	0.0234593
SGK3	0.845066	0.735876	0.970458	0.0170893	-1.17162	0.00602475	DP	Japonicone A	SGK3|220038_at	-2.21502	0.017726
CHORDC1	1.35337	1.08461	1.68874	0.00738307	-0.766173	0.00656369	DR	Japonicone A	CHORDC1|218566_s_at	1.96316	0.00238253
CHPT1	0.818919	0.707014	0.948537	0.00770526	-0.502848	0.0348998	DP	Japonicone A	CHPT1|221675_s_at	-0.590697	0.0168719
GPLD1	0.884538	0.786603	0.994666	0.0404339	0.842386	0.00994592	UP	Japonicone A	GPLD1|215554_at	-1.18256	0.0252477
SMAD5	1.3837	1.03898	1.84279	0.0263165	0.899666	9.29624e-05	UR	Japonicone A	SMAD5|205187_at	-0.740869	0.00910106
SMAD5	1.3837	1.03898	1.84279	0.0263165	0.899666	9.29624e-05	UR	Japonicone A	SMAD5|205188_s_at	1.19513	0.0353486
IFT57	0.734906	0.573439	0.941837	0.0149593	0.737613	0.0222441	UP	Japonicone A	IFT57|218100_s_at	0.794458	0.0492748
ROPN1B	0.926409	0.868646	0.988013	0.0199603	1.75644	0.0134835	UP	Japonicone A	ROPN1B|220425_x_at	-2.78483	0.0208256
NKTR	0.782871	0.613967	0.998241	0.0483634	-0.857731	0.029324	DP	Japonicone A	NKTR|202380_s_at	-0.799463	0.0157285
HSPH1	1.29343	1.05363	1.5878	0.0139213	-1.18808	0.00799231	DR	Japonicone A	HSPH1|206976_s_at	1.65875	0.00285879
HSPH1	1.29343	1.05363	1.5878	0.0139213	-1.18808	0.00799231	DR	Japonicone A	HSPH1|208744_x_at	3.31342	0.00307859
COPS5	1.46144	1.11614	1.91357	0.00579982	-0.507308	0.0176326	DR	Japonicone A	COPS5|201652_at	-0.70164	0.0273131
STAT5A	0.806238	0.674271	0.964033	0.018196	0.731619	0.0243399	UP	Japonicone A	STAT5A|203010_at	2.08257	0.00676676
SGCE	0.883745	0.789227	0.989583	0.0322412	1.64272	0.00510119	UP	Japonicone A	SGCE|204688_at	0.84154	0.0201813
CDKN1C	0.85026	0.741928	0.974409	0.0196601	2.51059	0.00922802	UP	Japonicone A	CDKN1C|213348_at	2.66565	0.0432356
CDKN1C	0.85026	0.741928	0.974409	0.0196601	2.51059	0.00922802	UP	Japonicone A	CDKN1C|216894_x_at	1.35741	0.0300199
RAP1GAP2	1.19803	1.0307	1.39253	0.0185795	0.650543	0.00448637	UR	Japonicone A	RAP1GAP2|213280_at	-0.716586	0.0471071
UBE2G1	1.57464	1.09372	2.26703	0.0146158	0.653258	0.000629595	UR	Japonicone A	UBE2G1|209141_at	0.519418	0.00176443
UBE2G1	1.57464	1.09372	2.26703	0.0146158	0.653258	0.000629595	UR	Japonicone A	UBE2G1|209142_s_at	0.506596	0.00250102
BTG1	0.729839	0.584047	0.912023	0.00560682	1.13706	0.0217191	UP	Japonicone A	BTG1|200920_s_at	-1.09206	0.00289018
BTG1	0.729839	0.584047	0.912023	0.00560682	1.13706	0.0217191	UP	Japonicone A	BTG1|200921_s_at	-1.30846	0.00157398
HNRNPA1	0.637302	0.448911	0.904754	0.0117421	0.573658	0.0153167	UP	Japonicone A	HNRNPA1|221919_at	-2.48787	0.014098
HNRNPA1	0.637302	0.448911	0.904754	0.0117421	0.573658	0.0153167	UP	Japonicone A	HNRNPA1|222040_at	-1.12024	0.0134134
BLK	0.899584	0.831928	0.972741	0.00798361	2.5648	0.000809085	UP	Japonicone A	BLK|210934_at	3.04632	0.0443976
RDX	1.24084	1.0063	1.53003	0.0435123	2.1846	0.00762614	UR	Japonicone A	RDX|204969_s_at	-1.01878	0.0130844
RDX	1.24084	1.0063	1.53003	0.0435123	2.1846	0.00762614	UR	Japonicone A	RDX|212397_at	-1.35863	0.00169174
RDX	1.24084	1.0063	1.53003	0.0435123	2.1846	0.00762614	UR	Japonicone A	RDX|212398_at	-1.39308	0.00653712
CYP1B1	0.884614	0.791722	0.988405	0.0303113	-0.793976	0.0081546	DP	Japonicone A	CYP1B1|202435_s_at	-2.28679	0.000644285
CYP1B1	0.884614	0.791722	0.988405	0.0303113	-0.793976	0.0081546	DP	Japonicone A	CYP1B1|202436_s_at	-2.60169	0.00047021
CYP1B1	0.884614	0.791722	0.988405	0.0303113	-0.793976	0.0081546	DP	Japonicone A	CYP1B1|202437_s_at	-2.59247	0.00765215
RDH16	1.11024	1.0195	1.20905	0.0162202	-0.87718	0.0361044	DR	Japonicone A	RDH16|206753_at	-2.72779	0.00245569
OSBPL1A	0.759189	0.624002	0.923664	0.00589396	-1.06865	0.00331599	DP	Japonicone A	OSBPL1A|208158_s_at	1.85292	0.0205583
OSBPL1A	0.759189	0.624002	0.923664	0.00589396	-1.06865	0.00331599	DP	Japonicone A	OSBPL1A|209485_s_at	1.61127	0.00591127
RFX5	0.742611	0.560088	0.984615	0.038669	0.96646	0.00638029	UP	Japonicone A	RFX5|202963_at	-3.3471	0.00113238
RFX5	0.742611	0.560088	0.984615	0.038669	0.96646	0.00638029	UP	Japonicone A	RFX5|202964_s_at	-1.51642	0.0322958
OSBPL10	1.26436	1.02556	1.55877	0.0280704	-0.579902	0.0010835	DR	Japonicone A	OSBPL10|219073_s_at	-0.897977	0.0244996
PLAC8	0.87431	0.802924	0.952043	0.00199588	-0.927298	0.0425076	DP	Japonicone A	PLAC8|219014_at	0.604435	0.0338009
NFKBIE	0.721325	0.583227	0.892123	0.00258886	-0.64969	0.0105279	DP	Japonicone A	NFKBIE|203927_at	0.825397	0.00898827
NTRK2	0.902823	0.831126	0.980706	0.0154597	1.26225	0.00347418	UP	Japonicone A	NTRK2|207152_at	2.91978	0.0182826
C11orf49	0.750902	0.58503	0.963803	0.0244836	0.741324	0.00532389	UP	Japonicone A	C11orf49|203257_s_at	-0.865145	0.00708027
PDCD4	0.809773	0.700083	0.93665	0.00449418	0.806707	0.0418405	UP	Japonicone A	PDCD4|212594_at	-1.08601	0.0148187
ACSL1	1.14576	1.00279	1.30912	0.0454038	0.692807	0.0392709	UR	Japonicone A	ACSL1|201963_at	1.2995	0.0328617
CABYR	0.821544	0.713662	0.945735	0.00620507	-0.731189	0.0150192	DP	Japonicone A	CABYR|219928_s_at	1.25485	0.00637323
TMPRSS3	0.94109	0.887447	0.997975	0.0425951	0.869182	0.00604686	UP	Japonicone A	TMPRSS3|220177_s_at	-1.62067	0.0191529
NPY1R	0.929391	0.885143	0.975851	0.00325952	2.8446	0.032752	UP	Japonicone A	NPY1R|205440_s_at	-1.82581	0.00417178
STK17A	0.720604	0.565252	0.918653	0.00817336	-0.517328	0.0315696	DP	Japonicone A	STK17A|202693_s_at	1.6063	0.00465403
FAM111A	0.700654	0.558797	0.878522	0.00205594	-0.887873	0.0020523	DP	Japonicone A	FAM111A|218248_at	-2.58441	0.00252487
RASGRP1	0.897784	0.817382	0.986095	0.0242915	1.59482	0.0431577	UP	Japonicone A	RASGRP1|205590_at	-2.04192	0.00162048
MYD88	0.66317	0.478391	0.919319	0.0137094	-0.638584	0.00281059	DP	Japonicone A	MYD88|209124_at	-0.722924	0.0142393
FAM131A	0.750821	0.58701	0.960346	0.0224792	-3.86772	0.00427204	DP	Japonicone A	FAM131A|221904_at	1.7687	0.00404117
EIF3F	0.685702	0.502515	0.935667	0.0173467	0.50653	0.0236911	UP	Japonicone A	EIF3F|200865_at	-2.89342	0.014537
EGR3	0.887756	0.813796	0.968438	0.00730609	1.48483	0.0198331	UP	Japonicone A	EGR3|206115_at	-1.76064	0.0064684
SGSH	0.692637	0.513894	0.93355	0.0158886	-0.638242	0.00192707	DP	Japonicone A	SGSH|35626_at	0.814031	0.00518357
PCYT2	0.711332	0.564688	0.896059	0.00383174	-1.16089	0.00985985	DP	Japonicone A	PCYT2|209577_at	1.77305	0.0076375
IFITM1	0.887122	0.790355	0.995736	0.0421059	1.82296	0.00450551	UP	Japonicone A	IFITM1|201601_x_at	-0.957972	0.0170431
IFITM1	0.887122	0.790355	0.995736	0.0421059	1.82296	0.00450551	UP	Japonicone A	IFITM1|214022_s_at	-0.885487	0.00239711
WWOX	1.25767	1.09301	1.44713	0.00136392	1.17696	0.009425	UR	Japonicone A	WWOX|210695_s_at	0.951102	0.00487726
WWOX	1.25767	1.09301	1.44713	0.00136392	1.17696	0.009425	UR	Japonicone A	WWOX|219077_s_at	1.33176	0.0139306
MST1P2	0.891528	0.796883	0.997415	0.0449446	0.69918	0.0239207	UP	Japonicone A	MST1P2|213380_x_at	-0.875164	0.0107386
SIRT7	0.742337	0.581829	0.947124	0.0165297	-0.55638	0.0352673	DP	Japonicone A	SIRT7|218797_s_at	1.26831	0.042185
EIF4EBP1	1.16139	1.01819	1.32474	0.0258554	0.783759	0.0129625	UR	Japonicone A	EIF4EBP1|221539_at	0.874389	0.0141893
SERPINA1	0.833568	0.762578	0.911167	6.11255e-05	1.83109	0.0415314	UP	Japonicone A	SERPINA1|202833_s_at	-3.35505	0.0287753
FAM114A1	1.31171	1.06252	1.61934	0.0115988	0.684411	0.00359831	UR	Japonicone A	FAM114A1|213455_at	-1.21676	0.00632759
MICB	0.867332	0.760993	0.988531	0.0329394	-2.30236	0.00351529	DP	Japonicone A	MICB|205905_s_at	1.4527	0.00407847
MICB	0.867332	0.760993	0.988531	0.0329394	-2.30236	0.00351529	DP	Japonicone A	MICB|206247_at	2.68458	0.00276882
PCDHGA1	1.1412	1.03674	1.25619	0.00700487	-1.31641	0.0142935	DR	Japonicone A	PCDHGA1|211066_x_at	-0.586127	0.0448771
ERCC1	0.668625	0.495232	0.902727	0.00858632	0.798187	0.036459	UP	Phillyrin	ERCC1|203720_s_at	0.958953	0.0127156
PEX3	1.38991	1.0576	1.82663	0.0181907	-0.663254	0.0311167	DR	Phillyrin	PEX3|203970_s_at	-0.57191	0.0431796
CYBA	0.856253	0.754196	0.972119	0.0165452	3.09865	0.00618658	UP	Phillyrin	CYBA|203028_s_at	0.804563	0.0175126
RFXANK	0.757901	0.596604	0.962805	0.023182	0.673415	0.00288057	UP	Phillyrin	RFXANK|202758_s_at	0.528783	0.0194419
ATP6AP1	1.31326	1.0099	1.70775	0.0420083	-0.603343	0.0143174	DR	Phillyrin	ATP6AP1|207809_s_at	0.750095	0.00593835
HSP90AA1	1.45205	1.16126	1.81567	0.00107115	-0.837049	0.012135	DR	Phillyrin	HSP90AA1|211968_s_at	0.914572	0.00839302
SQLE	1.17109	1.01247	1.35455	0.0334286	-1.23331	0.00275383	DR	Phillyrin	SQLE|213562_s_at	1.60899	0.015
TFPI2	0.863383	0.80825	0.922277	1.28211e-05	-2.19854	0.0243707	DP	Phillyrin	TFPI2|209278_s_at	-0.503308	0.00937922
PCDHB3	1.10456	1.00519	1.21376	0.038674	-0.69544	0.00778209	DR	Phillyrin	PCDHB3|221410_x_at	0.51918	0.0298217
LIFR	0.851201	0.755113	0.959516	0.00838425	-0.619908	0.0155398	DP	Phillyrin	LIFR|205876_at	2.04275	0.0225631
SMAD5	1.3837	1.03898	1.84279	0.0263165	0.899666	9.29624e-05	UR	Phillyrin	SMAD5|205188_s_at	1.08289	0.013309
IFT57	0.734906	0.573439	0.941837	0.0149593	0.737613	0.0222441	UP	Phillyrin	IFT57|218100_s_at	-0.591886	0.00134654
ROPN1B	0.926409	0.868646	0.988013	0.0199603	1.75644	0.0134835	UP	Phillyrin	ROPN1B|220425_x_at	-2.48704	0.0239918
GBP1	0.870173	0.779125	0.971861	0.0136581	1.76729	0.0118094	UP	Phillyrin	GBP1|202270_at	3.65403	0.00789844
HSPH1	1.29343	1.05363	1.5878	0.0139213	-1.18808	0.00799231	DR	Phillyrin	HSPH1|208744_x_at	0.647091	0.0331742
STAT5A	0.806238	0.674271	0.964033	0.018196	0.731619	0.0243399	UP	Phillyrin	STAT5A|203010_at	2.25525	0.000705153
CCNA1	0.847772	0.765215	0.939235	0.00158196	1.18635	0.019463	UP	Phillyrin	CCNA1|205899_at	2.74158	0.0415688
PTPN22	0.887953	0.794392	0.992533	0.036448	-0.765346	0.00689782	DP	Phillyrin	PTPN22|208010_s_at	-3.2536	0.0331238
CCNJL	0.886932	0.792788	0.992256	0.0361041	2.20658	8.20633e-05	UP	Phillyrin	CCNJL|219227_at	-0.989327	0.0126907
HNRNPA1	0.637302	0.448911	0.904754	0.0117421	0.573658	0.0153167	UP	Phillyrin	HNRNPA1|222040_at	0.732674	0.0290596
MICAL1	0.798048	0.663271	0.960212	0.0168416	-1.17499	0.000910863	DP	Phillyrin	MICAL1|218376_s_at	0.732423	0.0205307
REPS1	1.55073	1.16259	2.06846	0.00283656	-0.580046	0.0092244	DR	Phillyrin	REPS1|215201_at	-1.78904	0.0399294
BLK	0.899584	0.831928	0.972741	0.00798361	2.5648	0.000809085	UP	Phillyrin	BLK|206255_at	-1.07826	0.0301644
ESR2	0.773404	0.646698	0.924935	0.00488153	-1.09315	0.0168113	DP	Phillyrin	ESR2|211118_x_at	-1.12696	0.00748019
RPS11	0.712567	0.558205	0.909614	0.0065188	0.547105	0.0485921	UP	Phillyrin	RPS11|213350_at	-2.24794	0.00568956
PLAC8	0.87431	0.802924	0.952043	0.00199588	-0.927298	0.0425076	DP	Phillyrin	PLAC8|219014_at	-1.14766	0.011932
NTRK2	0.902823	0.831126	0.980706	0.0154597	1.26225	0.00347418	UP	Phillyrin	NTRK2|207152_at	3.16467	0.036134
PDCD4	0.809773	0.700083	0.93665	0.00449418	0.806707	0.0418405	UP	Phillyrin	PDCD4|202731_at	1.145	0.0221792
ZFP36L2	0.83299	0.698995	0.99267	0.0411334	1.21225	0.00710625	UP	Phillyrin	ZFP36L2|201367_s_at	3.3414	0.0460396
ZFP36L2	0.83299	0.698995	0.99267	0.0411334	1.21225	0.00710625	UP	Phillyrin	ZFP36L2|201368_at	-0.647927	0.0215904
UBXN1	0.732303	0.595967	0.899826	0.0030347	0.632671	0.0467226	UP	Phillyrin	UBXN1|210623_at	0.625688	0.0378311
NPY1R	0.929391	0.885143	0.975851	0.00325952	2.8446	0.032752	UP	Phillyrin	NPY1R|205440_s_at	-1.13037	0.0120297
CCT2	1.27593	1.00278	1.62349	0.0474168	-0.530121	0.0395902	DR	Phillyrin	CCT2|201946_s_at	1.35117	0.00173436
AZU1	0.9162	0.839788	0.999564	0.048864	0.835229	0.0284523	UP	Phillyrin	AZU1|214575_s_at	3.54721	0.0107797
RASGRP1	0.897784	0.817382	0.986095	0.0242915	1.59482	0.0431577	UP	Phillyrin	RASGRP1|205590_at	-1.67897	0.023158
CCDC106	0.83952	0.718383	0.981084	0.0277947	-1.45037	0.0193281	DP	Phillyrin	CCDC106|207006_s_at	0.965398	0.0399323
SCUBE2	0.945437	0.898299	0.995048	0.0315401	-1.15654	0.00740076	DP	Phillyrin	SCUBE2|219197_s_at	0.749489	0.0113931
NDUFAF3	0.794521	0.631881	0.999023	0.0490307	-0.707824	0.0087317	DP	Phillyrin	NDUFAF3|209177_at	0.501075	0.0284217
EGR3	0.887756	0.813796	0.968438	0.00730609	1.48483	0.0198331	UP	Phillyrin	EGR3|206115_at	0.582724	0.0213035
SGSH	0.692637	0.513894	0.93355	0.0158886	-0.638242	0.00192707	DP	Phillyrin	SGSH|35626_at	-0.500521	0.00469226
SIAH2	0.759912	0.646104	0.893767	0.000910778	0.720591	0.0280097	UP	Phillyrin	SIAH2|209339_at	1.04235	0.00507627
JRKL	1.20983	1.03499	1.41421	0.0167678	1.06378	0.00534918	UR	Phillyrin	JRKL|206734_at	-0.937314	0.0212079
TNFAIP2	0.849121	0.730359	0.987194	0.0333676	1.92497	0.00253009	UP	Phillyrin	TNFAIP2|202509_s_at	-3.28578	0.0238997
ZNF75D	1.46618	1.08796	1.97589	0.0119444	0.568738	0.0131017	UR	Phillyrin	ZNF75D|214813_at	0.869255	0.0237819
EIF4EBP1	1.16139	1.01819	1.32474	0.0258554	0.783759	0.0129625	UR	Phillyrin	EIF4EBP1|221539_at	0.595875	0.0328702
SERPINA1	0.833568	0.762578	0.911167	6.11255e-05	1.83109	0.0415314	UP	Phillyrin	SERPINA1|202833_s_at	1.42303	0.0160692
SERPINA1	0.833568	0.762578	0.911167	6.11255e-05	1.83109	0.0415314	UP	Phillyrin	SERPINA1|211429_s_at	1.61423	0.0193864
LY6G5C	0.83682	0.705237	0.992954	0.041253	-0.882802	0.0172129	DP	Phillyrin	LY6G5C|219860_at	0.841565	0.033201
ERCC1	0.668625	0.495232	0.902727	0.00858632	0.798187	0.036459	UP	Resveratrol	ERCC1|203720_s_at	1.01545	0.00461469
RPGRIP1	0.844091	0.719107	0.990797	0.038168	-1.21953	0.0109196	DP	Resveratrol	RPGRIP1|206608_s_at	0.674992	0.0327188
ATG4A	1.7216	1.24298	2.38452	0.00108041	-0.659957	0.0306252	DR	Resveratrol	ATG4A|213115_at	-0.502737	0.04952
TFPI2	0.863383	0.80825	0.922277	1.28211e-05	-2.19854	0.0243707	DP	Resveratrol	TFPI2|209278_s_at	0.843444	0.0154487
ALDH3A1	0.848685	0.766883	0.939213	0.00151031	2.20909	0.0112622	UP	Resveratrol	ALDH3A1|205623_at	-4.14623	0.0301555
B9D1	0.814768	0.681996	0.973389	0.023999	0.871076	0.00170412	UP	Resveratrol	B9D1|205662_at	0.82509	0.0328371
B9D1	0.814768	0.681996	0.973389	0.023999	0.871076	0.00170412	UP	Resveratrol	B9D1|210534_s_at	0.79312	0.00242413
B9D1	0.814768	0.681996	0.973389	0.023999	0.871076	0.00170412	UP	Resveratrol	B9D1|210535_at	0.583619	0.0173817
SLC29A1	1.20735	1.00322	1.45301	0.0461587	-0.735411	0.0272013	DR	Resveratrol	SLC29A1|201802_at	0.595848	0.0316153
LIFR	0.851201	0.755113	0.959516	0.00838425	-0.619908	0.0155398	DP	Resveratrol	LIFR|205876_at	1.6495	0.0183282
SMAD5	1.3837	1.03898	1.84279	0.0263165	0.899666	9.29624e-05	UR	Resveratrol	SMAD5|205188_s_at	1.20604	0.0420401
HSPH1	1.29343	1.05363	1.5878	0.0139213	-1.18808	0.00799231	DR	Resveratrol	HSPH1|206976_s_at	-0.606413	0.00289489
BST2	0.902419	0.815255	0.998902	0.0475742	1.43158	0.00292765	UP	Resveratrol	BST2|201641_at	-1.11406	0.0108235
CCNA1	0.847772	0.765215	0.939235	0.00158196	1.18635	0.019463	UP	Resveratrol	CCNA1|205899_at	2.98345	0.0136953
PTPN22	0.887953	0.794392	0.992533	0.036448	-0.765346	0.00689782	DP	Resveratrol	PTPN22|208010_s_at	-3.63324	0.00393596
HNRNPA1	0.637302	0.448911	0.904754	0.0117421	0.573658	0.0153167	UP	Resveratrol	HNRNPA1|222040_at	1.29368	0.0116019
REPS1	1.55073	1.16259	2.06846	0.00283656	-0.580046	0.0092244	DR	Resveratrol	REPS1|215201_at	-1.65309	0.0391543
BLK	0.899584	0.831928	0.972741	0.00798361	2.5648	0.000809085	UP	Resveratrol	BLK|210934_at	3.80483	0.0212838
CNPY3	0.743482	0.569517	0.970585	0.0292949	-0.5073	0.0165277	DP	Resveratrol	CNPY3|217931_at	-0.637629	0.0130904
CYP1B1	0.884614	0.791722	0.988405	0.0303113	-0.793976	0.0081546	DP	Resveratrol	CYP1B1|202436_s_at	-0.57078	0.00587245
SLC39A8	0.836641	0.721053	0.970758	0.0187137	-1.11532	0.0210013	DP	Resveratrol	SLC39A8|209266_s_at	-2.1252	0.0303285
SLC39A8	0.836641	0.721053	0.970758	0.0187137	-1.11532	0.0210013	DP	Resveratrol	SLC39A8|209267_s_at	0.57679	0.00971802
PMAIP1	0.851132	0.758668	0.954864	0.00601239	1.99112	0.0240982	UP	Resveratrol	PMAIP1|204286_s_at	-0.960278	0.0163943
RPS11	0.712567	0.558205	0.909614	0.0065188	0.547105	0.0485921	UP	Resveratrol	RPS11|213350_at	-1.14875	0.017048
OSBPL10	1.26436	1.02556	1.55877	0.0280704	-0.579902	0.0010835	DR	Resveratrol	OSBPL10|216755_at	-0.62802	0.0399766
TNFAIP8	0.793556	0.658078	0.956926	0.0154803	1.1739	0.00583217	UP	Resveratrol	TNFAIP8|208296_x_at	0.798889	0.0141096
TNFAIP8	0.793556	0.658078	0.956926	0.0154803	1.1739	0.00583217	UP	Resveratrol	TNFAIP8|210260_s_at	0.729816	0.00614105
NTRK2	0.902823	0.831126	0.980706	0.0154597	1.26225	0.00347418	UP	Resveratrol	NTRK2|207152_at	2.92194	0.0170528
PAK1	0.778242	0.632695	0.957271	0.0176278	1.44611	0.0053251	UP	Resveratrol	PAK1|209615_s_at	0.59925	0.0393918
ACSL1	1.14576	1.00279	1.30912	0.0454038	0.692807	0.0392709	UR	Resveratrol	ACSL1|201963_at	0.681726	0.0263764
CABYR	0.821544	0.713662	0.945735	0.00620507	-0.731189	0.0150192	DP	Resveratrol	CABYR|219928_s_at	0.767411	0.0359703
RASGRP1	0.897784	0.817382	0.986095	0.0242915	1.59482	0.0431577	UP	Resveratrol	RASGRP1|205590_at	0.587684	0.0233027
SCUBE2	0.945437	0.898299	0.995048	0.0315401	-1.15654	0.00740076	DP	Resveratrol	SCUBE2|219197_s_at	0.692582	0.00263944
DTX3	0.778381	0.643912	0.94093	0.00962017	0.61891	0.0301964	UP	Resveratrol	DTX3|49051_g_at	-2.21838	0.0195725
EGR3	0.887756	0.813796	0.968438	0.00730609	1.48483	0.0198331	UP	Resveratrol	EGR3|206115_at	0.791772	0.0181377
WWOX	1.25767	1.09301	1.44713	0.00136392	1.17696	0.009425	UR	Resveratrol	WWOX|210695_s_at	0.67253	0.027884
WWOX	1.25767	1.09301	1.44713	0.00136392	1.17696	0.009425	UR	Resveratrol	WWOX|219077_s_at	1.05511	0.0231623
MST1P2	0.891528	0.796883	0.997415	0.0449446	0.69918	0.0239207	UP	Resveratrol	MST1P2|213380_x_at	1.2366	0.0320302
ZNF75D	1.46618	1.08796	1.97589	0.0119444	0.568738	0.0131017	UR	Resveratrol	ZNF75D|214813_at	0.667863	0.0499984
SIRT7	0.742337	0.581829	0.947124	0.0165297	-0.55638	0.0352673	DP	Resveratrol	SIRT7|218797_s_at	-0.615402	0.0337994
LIME1	0.874153	0.786964	0.971001	0.012111	-0.527166	0.0479711	DP	Resveratrol	LIME1|57539_at	-0.530166	0.00519524
APOM	0.841745	0.728689	0.972342	0.0192265	0.968185	0.0210961	UP	Resveratrol	APOM|205682_x_at	0.645799	0.0463669
THTPA	0.786704	0.622502	0.994218	0.0445888	-0.500404	0.00768438	DP	Resveratrol	THTPA|218540_at	-0.535251	0.0276361
ANXA8	0.9265	0.874299	0.981817	0.009876	2.83724	0.0459999	UP	Resveratrol	ANXA8|203074_at	1.11181	0.0251554
PEX3	1.38991	1.0576	1.82663	0.0181907	-0.663254	0.0311167	DR	6-gingerol	PEX3|203969_at	-0.502452	0.0266122
ATP6AP1	1.31326	1.0099	1.70775	0.0420083	-0.603343	0.0143174	DR	6-gingerol	ATP6AP1|207809_s_at	0.583032	0.0063923
HSP90AA1	1.45205	1.16126	1.81567	0.00107115	-0.837049	0.012135	DR	6-gingerol	HSP90AA1|211968_s_at	1.04193	0.00859715
ATG4A	1.7216	1.24298	2.38452	0.00108041	-0.659957	0.0306252	DR	6-gingerol	ATG4A|213115_at	-0.715052	0.0122442
SQLE	1.17109	1.01247	1.35455	0.0334286	-1.23331	0.00275383	DR	6-gingerol	SQLE|213562_s_at	1.7799	0.01642
TFPI2	0.863383	0.80825	0.922277	1.28211e-05	-2.19854	0.0243707	DP	6-gingerol	TFPI2|209278_s_at	-1.32167	0.000591175
GPLD1	0.884538	0.786603	0.994666	0.0404339	0.842386	0.00994592	UP	6-gingerol	GPLD1|215554_at	-1.06642	0.0495901
IFT57	0.734906	0.573439	0.941837	0.0149593	0.737613	0.0222441	UP	6-gingerol	IFT57|218100_s_at	-0.604166	0.0247289
NKTR	0.782871	0.613967	0.998241	0.0483634	-0.857731	0.029324	DP	6-gingerol	NKTR|202379_s_at	-0.775877	0.0336776
NKTR	0.782871	0.613967	0.998241	0.0483634	-0.857731	0.029324	DP	6-gingerol	NKTR|215338_s_at	-0.502296	0.0263684
NFE2	0.837903	0.760061	0.923719	0.000378044	0.95057	0.0197538	UP	6-gingerol	NFE2|209930_s_at	2.50363	0.0300172
BST2	0.902419	0.815255	0.998902	0.0475742	1.43158	0.00292765	UP	6-gingerol	BST2|201641_at	-1.90355	0.00281382
HNRNPA1	0.637302	0.448911	0.904754	0.0117421	0.573658	0.0153167	UP	6-gingerol	HNRNPA1|221919_at	1.01367	0.00219922
BLK	0.899584	0.831928	0.972741	0.00798361	2.5648	0.000809085	UP	6-gingerol	BLK|210934_at	3.82258	0.0200823
CNPY3	0.743482	0.569517	0.970585	0.0292949	-0.5073	0.0165277	DP	6-gingerol	CNPY3|217931_at	1.13765	0.00297169
RDX	1.24084	1.0063	1.53003	0.0435123	2.1846	0.00762614	UR	6-gingerol	RDX|212397_at	-0.597635	0.00308195
CYP1B1	0.884614	0.791722	0.988405	0.0303113	-0.793976	0.0081546	DP	6-gingerol	CYP1B1|202434_s_at	3.4643	0.0174585
RPS11	0.712567	0.558205	0.909614	0.0065188	0.547105	0.0485921	UP	6-gingerol	RPS11|213350_at	-2.12336	0.00150454
PLAC8	0.87431	0.802924	0.952043	0.00199588	-0.927298	0.0425076	DP	6-gingerol	PLAC8|219014_at	-1.75872	0.00646266
TNFAIP8	0.793556	0.658078	0.956926	0.0154803	1.1739	0.00583217	UP	6-gingerol	TNFAIP8|210260_s_at	-0.587107	0.000234979
NTRK2	0.902823	0.831126	0.980706	0.0154597	1.26225	0.00347418	UP	6-gingerol	NTRK2|207152_at	2.88267	0.00315831
NTRK2	0.902823	0.831126	0.980706	0.0154597	1.26225	0.00347418	UP	6-gingerol	NTRK2|221796_at	-3.72017	0.0256101
PAK1	0.778242	0.632695	0.957271	0.0176278	1.44611	0.0053251	UP	6-gingerol	PAK1|209615_s_at	0.60381	0.03111
PDCD4	0.809773	0.700083	0.93665	0.00449418	0.806707	0.0418405	UP	6-gingerol	PDCD4|202731_at	1.23749	0.0222839
ZFP36L2	0.83299	0.698995	0.99267	0.0411334	1.21225	0.00710625	UP	6-gingerol	ZFP36L2|201368_at	-0.797565	0.00420485
STK17A	0.720604	0.565252	0.918653	0.00817336	-0.517328	0.0315696	DP	6-gingerol	STK17A|202694_at	1.46698	0.0143701
CCT2	1.27593	1.00278	1.62349	0.0474168	-0.530121	0.0395902	DR	6-gingerol	CCT2|201946_s_at	1.38909	0.00345236
TCTN2	0.788816	0.640573	0.971365	0.0255159	1.35085	0.000627153	UP	6-gingerol	TCTN2|206438_x_at	0.551047	0.0399387
RASGRP1	0.897784	0.817382	0.986095	0.0242915	1.59482	0.0431577	UP	6-gingerol	RASGRP1|205590_at	-1.96493	0.00322242
TP53I11	1.31094	1.04761	1.64047	0.0179584	0.623038	0.0143908	UR	6-gingerol	TP53I11|216919_at	1.94373	0.00233604
SCUBE2	0.945437	0.898299	0.995048	0.0315401	-1.15654	0.00740076	DP	6-gingerol	SCUBE2|219197_s_at	0.718223	0.00367637
NDUFAF3	0.794521	0.631881	0.999023	0.0490307	-0.707824	0.0087317	DP	6-gingerol	NDUFAF3|209177_at	0.621171	0.00749676
EGR3	0.887756	0.813796	0.968438	0.00730609	1.48483	0.0198331	UP	6-gingerol	EGR3|206115_at	0.788756	0.0239261
SIAH2	0.759912	0.646104	0.893767	0.000910778	0.720591	0.0280097	UP	6-gingerol	SIAH2|209339_at	1.12633	0.00419924
PCYT2	0.711332	0.564688	0.896059	0.00383174	-1.16089	0.00985985	DP	6-gingerol	PCYT2|209577_at	0.899569	0.0340223
IFITM1	0.887122	0.790355	0.995736	0.0421059	1.82296	0.00450551	UP	6-gingerol	IFITM1|214022_s_at	-0.64576	0.00788892
ZNF75D	1.46618	1.08796	1.97589	0.0119444	0.568738	0.0131017	UR	6-gingerol	ZNF75D|214813_at	0.650892	0.0402897
EIF4EBP1	1.16139	1.01819	1.32474	0.0258554	0.783759	0.0129625	UR	6-gingerol	EIF4EBP1|221539_at	0.748921	0.0211102
SERPINA1	0.833568	0.762578	0.911167	6.11255e-05	1.83109	0.0415314	UP	6-gingerol	SERPINA1|202833_s_at	1.29138	0.00438832
SERPINA1	0.833568	0.762578	0.911167	6.11255e-05	1.83109	0.0415314	UP	6-gingerol	SERPINA1|211428_at	3.45034	0.0413035
SERPINA1	0.833568	0.762578	0.911167	6.11255e-05	1.83109	0.0415314	UP	6-gingerol	SERPINA1|211429_s_at	1.83309	0.00902244
TRAF1	0.800699	0.69158	0.927034	0.00294374	1.69095	0.00982732	UP	Telocinobufagin	TRAF1|205599_at	-0.797618	0.0490301
CADM4	0.827547	0.714254	0.95881	0.0117384	1.13849	0.00103286	UP	Telocinobufagin	CADM4|214267_s_at	-3.52207	0.0485769
LIFR	0.851201	0.755113	0.959516	0.00838425	-0.619908	0.0155398	DP	Telocinobufagin	LIFR|205876_at	1.27133	0.0172037
STAT5A	0.806238	0.674271	0.964033	0.018196	0.731619	0.0243399	UP	Telocinobufagin	STAT5A|203010_at	2.19956	0.000841468
CDKN1C	0.85026	0.741928	0.974409	0.0196601	2.51059	0.00922802	UP	Telocinobufagin	CDKN1C|216894_x_at	-2.2578	0.0161106
NCOA2	1.15172	1.016	1.30557	0.0272385	-0.617842	0.0139082	DR	Telocinobufagin	NCOA2|205732_s_at	-3.43843	0.00799235
NTRK2	0.902823	0.831126	0.980706	0.0154597	1.26225	0.00347418	UP	Telocinobufagin	NTRK2|221796_at	-1.37716	0.0187366
AZU1	0.9162	0.839788	0.999564	0.048864	0.835229	0.0284523	UP	Telocinobufagin	AZU1|214575_s_at	3.41569	0.0203067
TMEM151B	0.755833	0.63307	0.902401	0.00196406	-1.54738	0.00552501	DP	Telocinobufagin	TMEM151B|213676_at	-2.78118	0.0403604
DTX3	0.778381	0.643912	0.94093	0.00962017	0.61891	0.0301964	UP	Telocinobufagin	DTX3|222022_at	-3.60628	0.00490484
WWOX	1.25767	1.09301	1.44713	0.00136392	1.17696	0.009425	UR	Telocinobufagin	WWOX|221147_x_at	-1.3044	0.0308062
MATK	0.879911	0.805265	0.961475	0.00467567	0.632765	0.0277852	UP	Hyodeoxycholic acid	MATK|206267_s_at	-1.21758	0.00436185
PEX3	1.38991	1.0576	1.82663	0.0181907	-0.663254	0.0311167	DR	Hyodeoxycholic acid	PEX3|203970_s_at	0.56373	0.0288691
ACAA1	0.739187	0.581464	0.939692	0.013589	-0.813662	0.000219263	DP	Hyodeoxycholic acid	ACAA1|202025_x_at	0.562029	0.018147
SYT1	0.935468	0.883442	0.990557	0.0223158	0.702441	0.0227156	UP	Hyodeoxycholic acid	SYT1|203998_s_at	0.750824	0.020974
HSP90AA1	1.45205	1.16126	1.81567	0.00107115	-0.837049	0.012135	DR	Hyodeoxycholic acid	HSP90AA1|210211_s_at	-0.521112	0.0364728
HSP90AA1	1.45205	1.16126	1.81567	0.00107115	-0.837049	0.012135	DR	Hyodeoxycholic acid	HSP90AA1|211968_s_at	0.713998	0.0136291
HSP90AA1	1.45205	1.16126	1.81567	0.00107115	-0.837049	0.012135	DR	Hyodeoxycholic acid	HSP90AA1|214328_s_at	-0.535131	0.0486203
SQLE	1.17109	1.01247	1.35455	0.0334286	-1.23331	0.00275383	DR	Hyodeoxycholic acid	SQLE|213577_at	0.814101	0.00700453
TFPI2	0.863383	0.80825	0.922277	1.28211e-05	-2.19854	0.0243707	DP	Hyodeoxycholic acid	TFPI2|209278_s_at	1.11671	0.000518295
SMAD5	1.3837	1.03898	1.84279	0.0263165	0.899666	9.29624e-05	UR	Hyodeoxycholic acid	SMAD5|205187_at	0.730872	0.00837054
SMAD5	1.3837	1.03898	1.84279	0.0263165	0.899666	9.29624e-05	UR	Hyodeoxycholic acid	SMAD5|205188_s_at	0.750416	0.0267227
IFT57	0.734906	0.573439	0.941837	0.0149593	0.737613	0.0222441	UP	Hyodeoxycholic acid	IFT57|218100_s_at	0.534874	0.0283985
NKTR	0.782871	0.613967	0.998241	0.0483634	-0.857731	0.029324	DP	Hyodeoxycholic acid	NKTR|215338_s_at	0.871532	0.0103775
HSPH1	1.29343	1.05363	1.5878	0.0139213	-1.18808	0.00799231	DR	Hyodeoxycholic acid	HSPH1|206976_s_at	-0.654616	0.0021086
HSPH1	1.29343	1.05363	1.5878	0.0139213	-1.18808	0.00799231	DR	Hyodeoxycholic acid	HSPH1|208744_x_at	1.3497	0.00714917
BST2	0.902419	0.815255	0.998902	0.0475742	1.43158	0.00292765	UP	Hyodeoxycholic acid	BST2|201641_at	-3.88686	0.0154601
PTPN22	0.887953	0.794392	0.992533	0.036448	-0.765346	0.00689782	DP	Hyodeoxycholic acid	PTPN22|208010_s_at	-3.24656	0.0284664
BLK	0.899584	0.831928	0.972741	0.00798361	2.5648	0.000809085	UP	Hyodeoxycholic acid	BLK|206255_at	-1.08601	0.0360532
RDX	1.24084	1.0063	1.53003	0.0435123	2.1846	0.00762614	UR	Hyodeoxycholic acid	RDX|212398_at	0.989922	0.0333888
SLC39A8	0.836641	0.721053	0.970758	0.0187137	-1.11532	0.0210013	DP	Hyodeoxycholic acid	SLC39A8|209267_s_at	1.06085	0.000903079
PMAIP1	0.851132	0.758668	0.954864	0.00601239	1.99112	0.0240982	UP	Hyodeoxycholic acid	PMAIP1|204286_s_at	-1.17661	0.00409465
RPS11	0.712567	0.558205	0.909614	0.0065188	0.547105	0.0485921	UP	Hyodeoxycholic acid	RPS11|213350_at	-1.44242	0.00327835
TNFAIP8	0.793556	0.658078	0.956926	0.0154803	1.1739	0.00583217	UP	Hyodeoxycholic acid	TNFAIP8|208296_x_at	0.804593	0.032727
ACSL1	1.14576	1.00279	1.30912	0.0454038	0.692807	0.0392709	UR	Hyodeoxycholic acid	ACSL1|201963_at	0.712586	0.0353704
LSS	1.27938	1.01217	1.61715	0.0392893	-0.801765	0.00818827	DR	Hyodeoxycholic acid	LSS|202245_at	0.738531	0.0225177
GBP2	0.786174	0.681481	0.90695	0.000968757	-1.58394	0.00506479	DP	Hyodeoxycholic acid	GBP2|202748_at	-0.684068	0.0275705
STK17A	0.720604	0.565252	0.918653	0.00817336	-0.517328	0.0315696	DP	Hyodeoxycholic acid	STK17A|202694_at	1.38596	0.00931359
RASGRP1	0.897784	0.817382	0.986095	0.0242915	1.59482	0.0431577	UP	Hyodeoxycholic acid	RASGRP1|205590_at	0.733913	0.0140959
SCUBE2	0.945437	0.898299	0.995048	0.0315401	-1.15654	0.00740076	DP	Hyodeoxycholic acid	SCUBE2|219197_s_at	0.59358	0.0157095
ARL4D	0.862721	0.752914	0.988543	0.0335147	2.86442	0.00170836	UP	Hyodeoxycholic acid	ARL4D|203587_at	-3.72915	0.00263835
NDUFAF3	0.794521	0.631881	0.999023	0.0490307	-0.707824	0.0087317	DP	Hyodeoxycholic acid	NDUFAF3|209177_at	-0.546215	0.0126383
EGR3	0.887756	0.813796	0.968438	0.00730609	1.48483	0.0198331	UP	Hyodeoxycholic acid	EGR3|206115_at	-0.780432	0.0153314
TNFAIP2	0.849121	0.730359	0.987194	0.0333676	1.92497	0.00253009	UP	Hyodeoxycholic acid	TNFAIP2|202510_s_at	-1.35452	0.0194135
IFITM1	0.887122	0.790355	0.995736	0.0421059	1.82296	0.00450551	UP	Hyodeoxycholic acid	IFITM1|201601_x_at	-0.699133	0.00914588
IFITM1	0.887122	0.790355	0.995736	0.0421059	1.82296	0.00450551	UP	Hyodeoxycholic acid	IFITM1|214022_s_at	-0.983636	0.0085407
WWOX	1.25767	1.09301	1.44713	0.00136392	1.17696	0.009425	UR	Hyodeoxycholic acid	WWOX|210695_s_at	0.961978	0.043579
WWOX	1.25767	1.09301	1.44713	0.00136392	1.17696	0.009425	UR	Hyodeoxycholic acid	WWOX|219077_s_at	1.56033	0.00913673
SERPINA1	0.833568	0.762578	0.911167	6.11255e-05	1.83109	0.0415314	UP	Hyodeoxycholic acid	SERPINA1|211428_at	3.33785	0.0223693
SERPINA1	0.833568	0.762578	0.911167	6.11255e-05	1.83109	0.0415314	UP	Hyodeoxycholic acid	SERPINA1|211429_s_at	-1.10651	0.0256251
ZNF345	0.694723	0.543148	0.888599	0.00372593	0.646037	0.0134328	UP	Hyodeoxycholic acid	ZNF345|207236_at	1.52221	0.0425066
MYO15B	0.865686	0.770419	0.972733	0.01532	0.936001	0.0447864	UP	Hyodeoxycholic acid	MYO15B|59375_at	-1.60275	0.0475204
ERCC1	0.668625	0.495232	0.902727	0.00858632	0.798187	0.036459	UP	Imperatorin	ERCC1|203720_s_at	0.741922	0.00526928
SQLE	1.17109	1.01247	1.35455	0.0334286	-1.23331	0.00275383	DR	Imperatorin	SQLE|213562_s_at	0.968559	0.0471089
CADM4	0.827547	0.714254	0.95881	0.0117384	1.13849	0.00103286	UP	Imperatorin	CADM4|214267_s_at	-2.62279	0.0408854
B9D1	0.814768	0.681996	0.973389	0.023999	0.871076	0.00170412	UP	Imperatorin	B9D1|210534_s_at	0.639334	0.044487
BACH2	0.889732	0.792249	0.999208	0.0484571	1.56354	0.00420312	UP	Imperatorin	BACH2|221234_s_at	-1.13298	0.0348282
LIFR	0.851201	0.755113	0.959516	0.00838425	-0.619908	0.0155398	DP	Imperatorin	LIFR|205876_at	1.97733	0.00424704
SMAD5	1.3837	1.03898	1.84279	0.0263165	0.899666	9.29624e-05	UR	Imperatorin	SMAD5|205187_at	1.07224	0.00302212
SMAD5	1.3837	1.03898	1.84279	0.0263165	0.899666	9.29624e-05	UR	Imperatorin	SMAD5|205188_s_at	1.4014	0.0138476
NFE2	0.837903	0.760061	0.923719	0.000378044	0.95057	0.0197538	UP	Imperatorin	NFE2|209930_s_at	3.66307	0.00320817
STAT5A	0.806238	0.674271	0.964033	0.018196	0.731619	0.0243399	UP	Imperatorin	STAT5A|203010_at	1.36783	0.00944677
HNRNPA1	0.637302	0.448911	0.904754	0.0117421	0.573658	0.0153167	UP	Imperatorin	HNRNPA1|222040_at	1.303	0.0104897
REPS1	1.55073	1.16259	2.06846	0.00283656	-0.580046	0.0092244	DR	Imperatorin	REPS1|215201_at	-1.8158	0.0326064
CYP1B1	0.884614	0.791722	0.988405	0.0303113	-0.793976	0.0081546	DP	Imperatorin	CYP1B1|202435_s_at	1.68756	0.00101024
CYP1B1	0.884614	0.791722	0.988405	0.0303113	-0.793976	0.0081546	DP	Imperatorin	CYP1B1|202436_s_at	1.51559	0.000262857
CYP1B1	0.884614	0.791722	0.988405	0.0303113	-0.793976	0.0081546	DP	Imperatorin	CYP1B1|202437_s_at	1.54977	0.0131629
NCOA2	1.15172	1.016	1.30557	0.0272385	-0.617842	0.0139082	DR	Imperatorin	NCOA2|205732_s_at	-1.51847	0.0274677
PMAIP1	0.851132	0.758668	0.954864	0.00601239	1.99112	0.0240982	UP	Imperatorin	PMAIP1|204285_s_at	-0.795941	0.0065395
PMAIP1	0.851132	0.758668	0.954864	0.00601239	1.99112	0.0240982	UP	Imperatorin	PMAIP1|204286_s_at	-1.14269	0.0120899
RPS11	0.712567	0.558205	0.909614	0.0065188	0.547105	0.0485921	UP	Imperatorin	RPS11|213350_at	-1.77724	0.00518355
TNFAIP8	0.793556	0.658078	0.956926	0.0154803	1.1739	0.00583217	UP	Imperatorin	TNFAIP8|210260_s_at	0.601033	0.00188684
NTRK2	0.902823	0.831126	0.980706	0.0154597	1.26225	0.00347418	UP	Imperatorin	NTRK2|207152_at	2.90427	0.0139867
NTRK2	0.902823	0.831126	0.980706	0.0154597	1.26225	0.00347418	UP	Imperatorin	NTRK2|221796_at	-1.92546	0.00974771
ACSL1	1.14576	1.00279	1.30912	0.0454038	0.692807	0.0392709	UR	Imperatorin	ACSL1|201963_at	0.674192	0.0321439
ZFP36L2	0.83299	0.698995	0.99267	0.0411334	1.21225	0.00710625	UP	Imperatorin	ZFP36L2|201367_s_at	3.45283	0.0429447
CABYR	0.821544	0.713662	0.945735	0.00620507	-0.731189	0.0150192	DP	Imperatorin	CABYR|219928_s_at	0.677298	0.00786621
CCT2	1.27593	1.00278	1.62349	0.0474168	-0.530121	0.0395902	DR	Imperatorin	CCT2|201946_s_at	0.663161	0.0235013
RASGRP1	0.897784	0.817382	0.986095	0.0242915	1.59482	0.0431577	UP	Imperatorin	RASGRP1|205590_at	0.671841	0.0315724
SCUBE2	0.945437	0.898299	0.995048	0.0315401	-1.15654	0.00740076	DP	Imperatorin	SCUBE2|219197_s_at	0.925429	0.0015596
TNFAIP2	0.849121	0.730359	0.987194	0.0333676	1.92497	0.00253009	UP	Imperatorin	TNFAIP2|202510_s_at	-1.51536	0.0164905
WWOX	1.25767	1.09301	1.44713	0.00136392	1.17696	0.009425	UR	Imperatorin	WWOX|210695_s_at	0.539953	0.0125179
MST1P2	0.891528	0.796883	0.997415	0.0449446	0.69918	0.0239207	UP	Imperatorin	MST1P2|213380_x_at	0.956154	0.0065689
EMID1	0.89492	0.816188	0.981248	0.018135	1.00239	0.0289249	UP	Imperatorin	EMID1|213779_at	1.3075	0.045732
SIRT7	0.742337	0.581829	0.947124	0.0165297	-0.55638	0.0352673	DP	Imperatorin	SIRT7|218797_s_at	-0.723382	0.00580779
SERPINA1	0.833568	0.762578	0.911167	6.11255e-05	1.83109	0.0415314	UP	Imperatorin	SERPINA1|211428_at	3.52678	0.0114325
ERCC1	0.668625	0.495232	0.902727	0.00858632	0.798187	0.036459	UP	Berberine hydrochloride	ERCC1|203720_s_at	0.684911	0.00617087
PEX3	1.38991	1.0576	1.82663	0.0181907	-0.663254	0.0311167	DR	Berberine hydrochloride	PEX3|203969_at	-1.03254	0.00325037
ATP6V1H	1.4151	1.10445	1.81312	0.00604006	-0.647518	0.0045928	DR	Berberine hydrochloride	ATP6V1H|221504_s_at	0.793285	0.00291325
TRAF1	0.800699	0.69158	0.927034	0.00294374	1.69095	0.00982732	UP	Berberine hydrochloride	TRAF1|205599_at	-3.59575	0.0163824
IL17RB	0.869437	0.762472	0.991408	0.0367268	-0.814825	0.0268579	DP	Berberine hydrochloride	IL17RB|219255_x_at	-1.08715	0.00438598
SYT1	0.935468	0.883442	0.990557	0.0223158	0.702441	0.0227156	UP	Berberine hydrochloride	SYT1|203998_s_at	0.82949	0.0287454
RASGRP2	0.90381	0.817214	0.999582	0.0490565	1.74272	0.000176205	UP	Berberine hydrochloride	RASGRP2|208206_s_at	-2.82849	0.00103425
ATP6AP1	1.31326	1.0099	1.70775	0.0420083	-0.603343	0.0143174	DR	Berberine hydrochloride	ATP6AP1|207809_s_at	0.702264	0.00282363
HSP90AA1	1.45205	1.16126	1.81567	0.00107115	-0.837049	0.012135	DR	Berberine hydrochloride	HSP90AA1|210211_s_at	-0.732558	0.00246201
HSP90AA1	1.45205	1.16126	1.81567	0.00107115	-0.837049	0.012135	DR	Berberine hydrochloride	HSP90AA1|211969_at	-0.600078	0.00222024
HSP90AA1	1.45205	1.16126	1.81567	0.00107115	-0.837049	0.012135	DR	Berberine hydrochloride	HSP90AA1|214328_s_at	-0.731736	0.0106151
ATG4A	1.7216	1.24298	2.38452	0.00108041	-0.659957	0.0306252	DR	Berberine hydrochloride	ATG4A|213115_at	-0.982629	0.00933983
ZFAND1	1.31591	1.02811	1.68426	0.0292472	0.886494	0.0112005	UR	Berberine hydrochloride	ZFAND1|218919_at	0.547522	0.00104496
SQLE	1.17109	1.01247	1.35455	0.0334286	-1.23331	0.00275383	DR	Berberine hydrochloride	SQLE|213562_s_at	1.07739	0.0327385
TFPI2	0.863383	0.80825	0.922277	1.28211e-05	-2.19854	0.0243707	DP	Berberine hydrochloride	TFPI2|209278_s_at	0.835705	0.00443364
B9D1	0.814768	0.681996	0.973389	0.023999	0.871076	0.00170412	UP	Berberine hydrochloride	B9D1|210534_s_at	0.855768	0.00794734
B9D1	0.814768	0.681996	0.973389	0.023999	0.871076	0.00170412	UP	Berberine hydrochloride	B9D1|210535_at	0.669416	0.0379067
LIFR	0.851201	0.755113	0.959516	0.00838425	-0.619908	0.0155398	DP	Berberine hydrochloride	LIFR|205876_at	2.49433	0.0422242
SMAD5	1.3837	1.03898	1.84279	0.0263165	0.899666	9.29624e-05	UR	Berberine hydrochloride	SMAD5|205188_s_at	1.9644	0.0232455
NKTR	0.782871	0.613967	0.998241	0.0483634	-0.857731	0.029324	DP	Berberine hydrochloride	NKTR|202379_s_at	0.64023	0.0254793
NKTR	0.782871	0.613967	0.998241	0.0483634	-0.857731	0.029324	DP	Berberine hydrochloride	NKTR|215338_s_at	0.629423	0.0205251
WLS	0.858826	0.768849	0.959332	0.007034	2.90317	0.0246185	UP	Berberine hydrochloride	WLS|221958_s_at	1.4618	0.02212
GBP1	0.870173	0.779125	0.971861	0.0136581	1.76729	0.0118094	UP	Berberine hydrochloride	GBP1|202270_at	3.17679	0.0128138
PCMT1	1.92122	1.44602	2.55259	6.67077e-06	-0.796184	0.00804124	DR	Berberine hydrochloride	PCMT1|205202_at	-0.523098	0.0149755
HSPH1	1.29343	1.05363	1.5878	0.0139213	-1.18808	0.00799231	DR	Berberine hydrochloride	HSPH1|206976_s_at	-1.22755	0.00177738
BST2	0.902419	0.815255	0.998902	0.0475742	1.43158	0.00292765	UP	Berberine hydrochloride	BST2|201641_at	-1.54461	0.0155004
RAP1GAP2	1.19803	1.0307	1.39253	0.0185795	0.650543	0.00448637	UR	Berberine hydrochloride	RAP1GAP2|213280_at	0.893443	0.00986559
CCNA1	0.847772	0.765215	0.939235	0.00158196	1.18635	0.019463	UP	Berberine hydrochloride	CCNA1|205899_at	2.78074	0.0265659
MKRN1	0.627527	0.413044	0.953386	0.0289867	0.694995	0.00691524	UP	Berberine hydrochloride	MKRN1|201285_at	0.553337	0.00457418
MKRN1	0.627527	0.413044	0.953386	0.0289867	0.694995	0.00691524	UP	Berberine hydrochloride	MKRN1|209845_at	1.05663	0.00982355
PTPN22	0.887953	0.794392	0.992533	0.036448	-0.765346	0.00689782	DP	Berberine hydrochloride	PTPN22|208010_s_at	-2.81951	0.0361741
HNRNPA1	0.637302	0.448911	0.904754	0.0117421	0.573658	0.0153167	UP	Berberine hydrochloride	HNRNPA1|213356_x_at	-0.511725	0.0365756
HNRNPA1	0.637302	0.448911	0.904754	0.0117421	0.573658	0.0153167	UP	Berberine hydrochloride	HNRNPA1|214280_x_at	0.576533	0.00530125
HNRNPA1	0.637302	0.448911	0.904754	0.0117421	0.573658	0.0153167	UP	Berberine hydrochloride	HNRNPA1|221919_at	-0.775091	0.00215423
HNRNPA1	0.637302	0.448911	0.904754	0.0117421	0.573658	0.0153167	UP	Berberine hydrochloride	HNRNPA1|222040_at	0.821443	0.0443802
MICAL1	0.798048	0.663271	0.960212	0.0168416	-1.17499	0.000910863	DP	Berberine hydrochloride	MICAL1|218376_s_at	0.618908	0.00763677
RDX	1.24084	1.0063	1.53003	0.0435123	2.1846	0.00762614	UR	Berberine hydrochloride	RDX|204969_s_at	0.960339	0.0375138
RDX	1.24084	1.0063	1.53003	0.0435123	2.1846	0.00762614	UR	Berberine hydrochloride	RDX|212398_at	1.11297	0.0492899
NCOA2	1.15172	1.016	1.30557	0.0272385	-0.617842	0.0139082	DR	Berberine hydrochloride	NCOA2|205732_s_at	-2.05352	0.0199395
RPS11	0.712567	0.558205	0.909614	0.0065188	0.547105	0.0485921	UP	Berberine hydrochloride	RPS11|213350_at	-2.65724	0.00119792
NTRK2	0.902823	0.831126	0.980706	0.0154597	1.26225	0.00347418	UP	Berberine hydrochloride	NTRK2|207152_at	2.8191	0.00146634
NTRK2	0.902823	0.831126	0.980706	0.0154597	1.26225	0.00347418	UP	Berberine hydrochloride	NTRK2|221796_at	-3.85815	0.0102161
C11orf49	0.750902	0.58503	0.963803	0.0244836	0.741324	0.00532389	UP	Berberine hydrochloride	C11orf49|203257_s_at	-0.966544	0.00358936
PDCD4	0.809773	0.700083	0.93665	0.00449418	0.806707	0.0418405	UP	Berberine hydrochloride	PDCD4|202731_at	0.842574	0.0416673
ACSL1	1.14576	1.00279	1.30912	0.0454038	0.692807	0.0392709	UR	Berberine hydrochloride	ACSL1|201963_at	0.884343	0.0143606
ZFP36L2	0.83299	0.698995	0.99267	0.0411334	1.21225	0.00710625	UP	Berberine hydrochloride	ZFP36L2|201367_s_at	3.63789	0.0449413
ZFP36L2	0.83299	0.698995	0.99267	0.0411334	1.21225	0.00710625	UP	Berberine hydrochloride	ZFP36L2|201368_at	0.640013	0.00320142
ZFP36L2	0.83299	0.698995	0.99267	0.0411334	1.21225	0.00710625	UP	Berberine hydrochloride	ZFP36L2|201369_s_at	0.78435	0.027123
CABYR	0.821544	0.713662	0.945735	0.00620507	-0.731189	0.0150192	DP	Berberine hydrochloride	CABYR|219928_s_at	0.846873	0.00310955
TMPRSS3	0.94109	0.887447	0.997975	0.0425951	0.869182	0.00604686	UP	Berberine hydrochloride	TMPRSS3|220177_s_at	-1.45783	0.0094322
RPS14	0.780611	0.616312	0.988708	0.0399616	0.910178	0.0284209	UP	Berberine hydrochloride	RPS14|208645_s_at	-0.542158	0.00680208
CCT2	1.27593	1.00278	1.62349	0.0474168	-0.530121	0.0395902	DR	Berberine hydrochloride	CCT2|201946_s_at	0.612952	0.0090146
CCT2	1.27593	1.00278	1.62349	0.0474168	-0.530121	0.0395902	DR	Berberine hydrochloride	CCT2|201947_s_at	-0.548652	0.00498284
FAM111A	0.700654	0.558797	0.878522	0.00205594	-0.887873	0.0020523	DP	Berberine hydrochloride	FAM111A|218248_at	-0.680316	0.0163248
ATF5	0.791604	0.628565	0.996931	0.0470238	-0.61731	0.00214719	DP	Berberine hydrochloride	ATF5|204998_s_at	-0.545635	0.0111461
SERPINB9	0.836411	0.720185	0.971394	0.0192749	-0.713131	0.0156784	DP	Berberine hydrochloride	SERPINB9|209723_at	-1.73223	0.0440077
TLN2	0.833613	0.695783	0.998745	0.0484298	-0.927363	0.00221108	DP	Berberine hydrochloride	TLN2|212703_at	-1.65908	0.0244958
CCDC106	0.83952	0.718383	0.981084	0.0277947	-1.45037	0.0193281	DP	Berberine hydrochloride	CCDC106|207006_s_at	0.548383	0.044668
PSMD1	1.57189	1.08944	2.26799	0.015608	-0.720859	0.0182201	DR	Berberine hydrochloride	PSMD1|201199_s_at	-0.820606	0.00633598
SIAH2	0.759912	0.646104	0.893767	0.000910778	0.720591	0.0280097	UP	Berberine hydrochloride	SIAH2|209339_at	0.824068	0.007482
IFITM1	0.887122	0.790355	0.995736	0.0421059	1.82296	0.00450551	UP	Berberine hydrochloride	IFITM1|201601_x_at	0.527333	0.0298527
WWOX	1.25767	1.09301	1.44713	0.00136392	1.17696	0.009425	UR	Berberine hydrochloride	WWOX|210695_s_at	0.741775	0.00360034
WWOX	1.25767	1.09301	1.44713	0.00136392	1.17696	0.009425	UR	Berberine hydrochloride	WWOX|219077_s_at	0.829999	0.0469058
FAM86B1	0.834618	0.731111	0.952779	0.00745096	0.546593	0.0220595	UP	Berberine hydrochloride	FAM86B1|65585_at	-0.9035	0.00103276
SIRT7	0.742337	0.581829	0.947124	0.0165297	-0.55638	0.0352673	DP	Berberine hydrochloride	SIRT7|218797_s_at	-0.509359	0.00233715
PEX3	1.38991	1.0576	1.82663	0.0181907	-0.663254	0.0311167	DR	Ginsenoside Rc	PEX3|203970_s_at	0.537602	0.00179747
ACAA1	0.739187	0.581464	0.939692	0.013589	-0.813662	0.000219263	DP	Ginsenoside Rc	ACAA1|202025_x_at	0.514952	0.0234069
SYT1	0.935468	0.883442	0.990557	0.0223158	0.702441	0.0227156	UP	Ginsenoside Rc	SYT1|203998_s_at	0.551914	0.0352812
HSP90AA1	1.45205	1.16126	1.81567	0.00107115	-0.837049	0.012135	DR	Ginsenoside Rc	HSP90AA1|211968_s_at	0.633724	0.024333
SQLE	1.17109	1.01247	1.35455	0.0334286	-1.23331	0.00275383	DR	Ginsenoside Rc	SQLE|213577_at	0.821091	0.0175626
B9D1	0.814768	0.681996	0.973389	0.023999	0.871076	0.00170412	UP	Ginsenoside Rc	B9D1|210534_s_at	0.527524	0.0082867
GPLD1	0.884538	0.786603	0.994666	0.0404339	0.842386	0.00994592	UP	Ginsenoside Rc	GPLD1|215554_at	-0.813292	0.0423283
FAM172A	1.34014	1.02722	1.7484	0.0309375	0.53385	0.00409447	UR	Ginsenoside Rc	FAM172A|212936_at	0.538254	0.00416495
SMAD5	1.3837	1.03898	1.84279	0.0263165	0.899666	9.29624e-05	UR	Ginsenoside Rc	SMAD5|205187_at	0.909397	0.0208513
SMAD5	1.3837	1.03898	1.84279	0.0263165	0.899666	9.29624e-05	UR	Ginsenoside Rc	SMAD5|205188_s_at	1.093	0.0242521
IFT57	0.734906	0.573439	0.941837	0.0149593	0.737613	0.0222441	UP	Ginsenoside Rc	IFT57|218100_s_at	0.521938	0.000326844
NKTR	0.782871	0.613967	0.998241	0.0483634	-0.857731	0.029324	DP	Ginsenoside Rc	NKTR|215338_s_at	0.790996	0.0268713
HSPH1	1.29343	1.05363	1.5878	0.0139213	-1.18808	0.00799231	DR	Ginsenoside Rc	HSPH1|206976_s_at	-0.636268	0.0023731
HSPH1	1.29343	1.05363	1.5878	0.0139213	-1.18808	0.00799231	DR	Ginsenoside Rc	HSPH1|208744_x_at	1.33128	0.00749017
STAT5A	0.806238	0.674271	0.964033	0.018196	0.731619	0.0243399	UP	Ginsenoside Rc	STAT5A|203010_at	1.55744	0.00788412
SGCE	0.883745	0.789227	0.989583	0.0322412	1.64272	0.00510119	UP	Ginsenoside Rc	SGCE|204688_at	0.754557	0.00496265
APOL2	0.776288	0.633337	0.951505	0.0147406	-0.69624	0.0135996	DP	Ginsenoside Rc	APOL2|221013_s_at	-1.33341	0.0413924
BST2	0.902419	0.815255	0.998902	0.0475742	1.43158	0.00292765	UP	Ginsenoside Rc	BST2|201641_at	-1.58037	0.00952998
PTPN22	0.887953	0.794392	0.992533	0.036448	-0.765346	0.00689782	DP	Ginsenoside Rc	PTPN22|208010_s_at	-1.34501	0.00166637
HNRNPA1	0.637302	0.448911	0.904754	0.0117421	0.573658	0.0153167	UP	Ginsenoside Rc	HNRNPA1|222040_at	0.997942	0.0157451
CNPY3	0.743482	0.569517	0.970585	0.0292949	-0.5073	0.0165277	DP	Ginsenoside Rc	CNPY3|217931_at	-0.51551	0.0151524
RDX	1.24084	1.0063	1.53003	0.0435123	2.1846	0.00762614	UR	Ginsenoside Rc	RDX|212398_at	0.75064	0.0246002
CYP1B1	0.884614	0.791722	0.988405	0.0303113	-0.793976	0.0081546	DP	Ginsenoside Rc	CYP1B1|202434_s_at	1.02335	0.0448458
SLC39A8	0.836641	0.721053	0.970758	0.0187137	-1.11532	0.0210013	DP	Ginsenoside Rc	SLC39A8|209266_s_at	-2.33723	0.00488464
SLC39A8	0.836641	0.721053	0.970758	0.0187137	-1.11532	0.0210013	DP	Ginsenoside Rc	SLC39A8|209267_s_at	0.965218	0.000237531
PMAIP1	0.851132	0.758668	0.954864	0.00601239	1.99112	0.0240982	UP	Ginsenoside Rc	PMAIP1|204286_s_at	-1.05622	0.00396966
RPS11	0.712567	0.558205	0.909614	0.0065188	0.547105	0.0485921	UP	Ginsenoside Rc	RPS11|213350_at	-1.10796	0.0136212
TNFAIP8	0.793556	0.658078	0.956926	0.0154803	1.1739	0.00583217	UP	Ginsenoside Rc	TNFAIP8|208296_x_at	0.503336	0.0360929
NTRK2	0.902823	0.831126	0.980706	0.0154597	1.26225	0.00347418	UP	Ginsenoside Rc	NTRK2|207152_at	2.82184	0.0123858
SERPING1	0.846311	0.725765	0.986879	0.0333012	2.70802	0.00262193	UP	Ginsenoside Rc	SERPING1|200986_at	-2.59113	0.02542
ACSL1	1.14576	1.00279	1.30912	0.0454038	0.692807	0.0392709	UR	Ginsenoside Rc	ACSL1|201963_at	0.534047	0.0494896
C2CD2	1.2626	1.03022	1.54741	0.0246529	1.59717	0.0377865	UR	Ginsenoside Rc	C2CD2|212875_s_at	0.546036	0.0329766
LSS	1.27938	1.01217	1.61715	0.0392893	-0.801765	0.00818827	DR	Ginsenoside Rc	LSS|202245_at	0.594448	0.0262054
GBP2	0.786174	0.681481	0.90695	0.000968757	-1.58394	0.00506479	DP	Ginsenoside Rc	GBP2|202748_at	-0.776725	0.00671238
ATF5	0.791604	0.628565	0.996931	0.0470238	-0.61731	0.00214719	DP	Ginsenoside Rc	ATF5|204999_s_at	0.996198	0.044679
RASGRP1	0.897784	0.817382	0.986095	0.0242915	1.59482	0.0431577	UP	Ginsenoside Rc	RASGRP1|205590_at	0.692603	0.0108641
PSMD2	1.45668	1.08228	1.9606	0.0130788	-0.572307	0.0132295	DR	Ginsenoside Rc	PSMD2|200830_at	0.536038	0.00582606
CALML3	0.926957	0.880579	0.975777	0.00377577	1.16309	0.0187678	UP	Ginsenoside Rc	CALML3|210019_at	-1.36517	0.045314
CALML3	0.926957	0.880579	0.975777	0.00377577	1.16309	0.0187678	UP	Ginsenoside Rc	CALML3|210020_x_at	-0.80717	0.00401411
DTX3	0.778381	0.643912	0.94093	0.00962017	0.61891	0.0301964	UP	Ginsenoside Rc	DTX3|49051_g_at	-0.930678	0.0399037
EGR3	0.887756	0.813796	0.968438	0.00730609	1.48483	0.0198331	UP	Ginsenoside Rc	EGR3|206115_at	-0.993328	0.029334
IFITM1	0.887122	0.790355	0.995736	0.0421059	1.82296	0.00450551	UP	Ginsenoside Rc	IFITM1|201601_x_at	-0.632732	0.0103798
IFITM1	0.887122	0.790355	0.995736	0.0421059	1.82296	0.00450551	UP	Ginsenoside Rc	IFITM1|214022_s_at	-0.928544	0.000758338
WWOX	1.25767	1.09301	1.44713	0.00136392	1.17696	0.009425	UR	Ginsenoside Rc	WWOX|210695_s_at	0.939948	0.0049838
WWOX	1.25767	1.09301	1.44713	0.00136392	1.17696	0.009425	UR	Ginsenoside Rc	WWOX|219077_s_at	1.51401	0.0123638
SERPINA1	0.833568	0.762578	0.911167	6.11255e-05	1.83109	0.0415314	UP	Ginsenoside Rc	SERPINA1|202833_s_at	-1.72851	0.0199162
SERPINA1	0.833568	0.762578	0.911167	6.11255e-05	1.83109	0.0415314	UP	Ginsenoside Rc	SERPINA1|211428_at	3.26331	0.029237
SERPINA1	0.833568	0.762578	0.911167	6.11255e-05	1.83109	0.0415314	UP	Ginsenoside Rc	SERPINA1|211429_s_at	-1.91169	0.00620103
ZNF345	0.694723	0.543148	0.888599	0.00372593	0.646037	0.0134328	UP	Ginsenoside Rc	ZNF345|207236_at	1.58547	0.0420178
TRAF1	0.800699	0.69158	0.927034	0.00294374	1.69095	0.00982732	UP	Bufalin	TRAF1|205599_at	-1.62742	0.0361108
CADM4	0.827547	0.714254	0.95881	0.0117384	1.13849	0.00103286	UP	Bufalin	CADM4|214267_s_at	-2.89792	0.0242924
ROPN1B	0.926409	0.868646	0.988013	0.0199603	1.75644	0.0134835	UP	Bufalin	ROPN1B|220425_x_at	-3.58134	0.0187201
NFE2	0.837903	0.760061	0.923719	0.000378044	0.95057	0.0197538	UP	Bufalin	NFE2|209930_s_at	2.61798	0.0171418
BLK	0.899584	0.831928	0.972741	0.00798361	2.5648	0.000809085	UP	Bufalin	BLK|206255_at	1.37355	0.0124303
BLK	0.899584	0.831928	0.972741	0.00798361	2.5648	0.000809085	UP	Bufalin	BLK|210934_at	2.93305	0.0465915
ESR2	0.773404	0.646698	0.924935	0.00488153	-1.09315	0.0168113	DP	Bufalin	ESR2|211118_x_at	-1.08656	0.00625417
LSS	1.27938	1.01217	1.61715	0.0392893	-0.801765	0.00818827	DR	Bufalin	LSS|211019_s_at	-0.659703	0.0395658
STK17A	0.720604	0.565252	0.918653	0.00817336	-0.517328	0.0315696	DP	Bufalin	STK17A|202694_at	0.503827	0.0394279
RPS14	0.780611	0.616312	0.988708	0.0399616	0.910178	0.0284209	UP	Bufalin	RPS14|214245_at	-1.25388	0.00546713
KLK7	0.947965	0.899012	0.999582	0.0482223	4.69496	0.00833379	UP	Bufalin	KLK7|205778_at	-3.40376	0.0362312
ATF5	0.791604	0.628565	0.996931	0.0470238	-0.61731	0.00214719	DP	Bufalin	ATF5|204999_s_at	0.597503	0.0214143
CALML3	0.926957	0.880579	0.975777	0.00377577	1.16309	0.0187678	UP	Bufalin	CALML3|210019_at	-4.05388	0.0234406
CACNA1H	1.11228	1.03596	1.19422	0.0033459	0.722256	0.0129306	UR	Bufalin	CACNA1H|205845_at	1.41079	0.0297807
ERCC1	0.668625	0.495232	0.902727	0.00858632	0.798187	0.036459	UP	Chlorogenic acid	ERCC1|203720_s_at	0.585991	0.00844416
TRAF1	0.800699	0.69158	0.927034	0.00294374	1.69095	0.00982732	UP	Chlorogenic acid	TRAF1|205599_at	-0.860544	0.0381387
IL17RB	0.869437	0.762472	0.991408	0.0367268	-0.814825	0.0268579	DP	Chlorogenic acid	IL17RB|219255_x_at	-0.68193	0.0379251
TP63	0.895433	0.835731	0.959399	0.00170513	2.45926	0.00352212	UP	Chlorogenic acid	TP63|209863_s_at	0.648194	0.0146538
RPGRIP1	0.844091	0.719107	0.990797	0.038168	-1.21953	0.0109196	DP	Chlorogenic acid	RPGRIP1|206608_s_at	0.656811	0.0437564
ATG4A	1.7216	1.24298	2.38452	0.00108041	-0.659957	0.0306252	DR	Chlorogenic acid	ATG4A|213115_at	-0.713285	0.0119127
TFPI2	0.863383	0.80825	0.922277	1.28211e-05	-2.19854	0.0243707	DP	Chlorogenic acid	TFPI2|209278_s_at	0.855374	0.0036275
B9D1	0.814768	0.681996	0.973389	0.023999	0.871076	0.00170412	UP	Chlorogenic acid	B9D1|210534_s_at	0.729	0.0123566
WLS	0.858826	0.768849	0.959332	0.007034	2.90317	0.0246185	UP	Chlorogenic acid	WLS|221958_s_at	0.927027	0.0479888
GBP1	0.870173	0.779125	0.971861	0.0136581	1.76729	0.0118094	UP	Chlorogenic acid	GBP1|202270_at	3.03318	0.0441874
HSPH1	1.29343	1.05363	1.5878	0.0139213	-1.18808	0.00799231	DR	Chlorogenic acid	HSPH1|206976_s_at	-0.656674	0.00738509
STAT5A	0.806238	0.674271	0.964033	0.018196	0.731619	0.0243399	UP	Chlorogenic acid	STAT5A|203010_at	1.73696	0.0378425
BST2	0.902419	0.815255	0.998902	0.0475742	1.43158	0.00292765	UP	Chlorogenic acid	BST2|201641_at	-1.35848	0.0122447
CCNA1	0.847772	0.765215	0.939235	0.00158196	1.18635	0.019463	UP	Chlorogenic acid	CCNA1|205899_at	2.58483	0.0192474
HNRNPA1	0.637302	0.448911	0.904754	0.0117421	0.573658	0.0153167	UP	Chlorogenic acid	HNRNPA1|222040_at	1.1685	0.017133
REPS1	1.55073	1.16259	2.06846	0.00283656	-0.580046	0.0092244	DR	Chlorogenic acid	REPS1|215201_at	-1.73744	0.0489051
CYP1B1	0.884614	0.791722	0.988405	0.0303113	-0.793976	0.0081546	DP	Chlorogenic acid	CYP1B1|202436_s_at	-0.561155	0.00970893
SLC39A8	0.836641	0.721053	0.970758	0.0187137	-1.11532	0.0210013	DP	Chlorogenic acid	SLC39A8|209267_s_at	0.547155	0.026844
PMAIP1	0.851132	0.758668	0.954864	0.00601239	1.99112	0.0240982	UP	Chlorogenic acid	PMAIP1|204286_s_at	-0.813901	0.0053491
RPS11	0.712567	0.558205	0.909614	0.0065188	0.547105	0.0485921	UP	Chlorogenic acid	RPS11|213350_at	-1.61419	0.00420996
OSBPL10	1.26436	1.02556	1.55877	0.0280704	-0.579902	0.0010835	DR	Chlorogenic acid	OSBPL10|216755_at	-1.35738	0.00891266
NTRK2	0.902823	0.831126	0.980706	0.0154597	1.26225	0.00347418	UP	Chlorogenic acid	NTRK2|207152_at	2.57299	0.0111296
SERPING1	0.846311	0.725765	0.986879	0.0333012	2.70802	0.00262193	UP	Chlorogenic acid	SERPING1|200986_at	-2.17299	0.0477507
ZFP36L2	0.83299	0.698995	0.99267	0.0411334	1.21225	0.00710625	UP	Chlorogenic acid	ZFP36L2|201367_s_at	3.88482	0.0354429
STK17A	0.720604	0.565252	0.918653	0.00817336	-0.517328	0.0315696	DP	Chlorogenic acid	STK17A|202694_at	0.732142	0.0349211
RASGRP1	0.897784	0.817382	0.986095	0.0242915	1.59482	0.0431577	UP	Chlorogenic acid	RASGRP1|205590_at	0.757829	0.0102283
SCUBE2	0.945437	0.898299	0.995048	0.0315401	-1.15654	0.00740076	DP	Chlorogenic acid	SCUBE2|219197_s_at	0.609524	0.00314734
CALML3	0.926957	0.880579	0.975777	0.00377577	1.16309	0.0187678	UP	Chlorogenic acid	CALML3|210019_at	-2.72785	0.00719673
EGR3	0.887756	0.813796	0.968438	0.00730609	1.48483	0.0198331	UP	Chlorogenic acid	EGR3|206115_at	0.566393	0.0485813
JRKL	1.20983	1.03499	1.41421	0.0167678	1.06378	0.00534918	UR	Chlorogenic acid	JRKL|206734_at	-0.598301	0.0300639
TNFAIP2	0.849121	0.730359	0.987194	0.0333676	1.92497	0.00253009	UP	Chlorogenic acid	TNFAIP2|202510_s_at	-1.96313	0.00982534
WWOX	1.25767	1.09301	1.44713	0.00136392	1.17696	0.009425	UR	Chlorogenic acid	WWOX|210695_s_at	0.634541	0.00918828
WWOX	1.25767	1.09301	1.44713	0.00136392	1.17696	0.009425	UR	Chlorogenic acid	WWOX|219077_s_at	0.908931	0.0285213
MST1P2	0.891528	0.796883	0.997415	0.0449446	0.69918	0.0239207	UP	Chlorogenic acid	MST1P2|213380_x_at	0.766867	0.00384572
SERPINA1	0.833568	0.762578	0.911167	6.11255e-05	1.83109	0.0415314	UP	Chlorogenic acid	SERPINA1|211428_at	2.66095	0.0119121
THTPA	0.786704	0.622502	0.994218	0.0445888	-0.500404	0.00768438	DP	Chlorogenic acid	THTPA|218540_at	-0.526204	0.00326435
TP63	0.895433	0.835731	0.959399	0.00170513	2.45926	0.00352212	UP	Alantolactone	TP63|209863_s_at	-0.728945	0.0145811
SLC29A1	1.20735	1.00322	1.45301	0.0461587	-0.735411	0.0272013	DR	Alantolactone	SLC29A1|201802_at	0.544388	0.0283598
SMAD5	1.3837	1.03898	1.84279	0.0263165	0.899666	9.29624e-05	UR	Alantolactone	SMAD5|205188_s_at	0.621437	0.0277503
STAT5A	0.806238	0.674271	0.964033	0.018196	0.731619	0.0243399	UP	Alantolactone	STAT5A|203010_at	1.4591	0.00403235
APOL2	0.776288	0.633337	0.951505	0.0147406	-0.69624	0.0135996	DP	Alantolactone	APOL2|221013_s_at	-1.97569	0.0177941
BLK	0.899584	0.831928	0.972741	0.00798361	2.5648	0.000809085	UP	Alantolactone	BLK|210934_at	3.01329	0.0349889
PLAC8	0.87431	0.802924	0.952043	0.00199588	-0.927298	0.0425076	DP	Alantolactone	PLAC8|219014_at	-1.02676	0.0354199
NTRK2	0.902823	0.831126	0.980706	0.0154597	1.26225	0.00347418	UP	Alantolactone	NTRK2|207152_at	3.26517	0.00565509
PAK1	0.778242	0.632695	0.957271	0.0176278	1.44611	0.0053251	UP	Alantolactone	PAK1|209615_s_at	0.588067	0.0316775
NPY1R	0.929391	0.885143	0.975851	0.00325952	2.8446	0.032752	UP	Alantolactone	NPY1R|205440_s_at	0.517857	0.0418777
EIF3F	0.685702	0.502515	0.935667	0.0173467	0.50653	0.0236911	UP	Alantolactone	EIF3F|200865_at	-2.96562	0.0132832
CALML3	0.926957	0.880579	0.975777	0.00377577	1.16309	0.0187678	UP	Alantolactone	CALML3|210019_at	-1.3315	0.0285927
TNFAIP2	0.849121	0.730359	0.987194	0.0333676	1.92497	0.00253009	UP	Alantolactone	TNFAIP2|202510_s_at	-0.989289	0.0354395
IFITM1	0.887122	0.790355	0.995736	0.0421059	1.82296	0.00450551	UP	Alantolactone	IFITM1|201601_x_at	0.58325	0.0200445
IFITM1	0.887122	0.790355	0.995736	0.0421059	1.82296	0.00450551	UP	Alantolactone	IFITM1|214022_s_at	0.589681	0.0172004
RGL3	0.911448	0.848142	0.97948	0.0115873	3.43248	0.000766773	UP	Alantolactone	RGL3|215054_at	0.878114	0.0496888
PEX3	1.38991	1.0576	1.82663	0.0181907	-0.663254	0.0311167	DR	Bacopaside I	PEX3|203970_s_at	0.557036	0.0113042
IFI35	0.843555	0.72589	0.980293	0.0264428	0.895068	0.0231157	UP	Bacopaside I	IFI35|209417_s_at	-1.04906	0.0186149
RPGRIP1	0.844091	0.719107	0.990797	0.038168	-1.21953	0.0109196	DP	Bacopaside I	RPGRIP1|206608_s_at	1.54279	0.0107385
TFPI2	0.863383	0.80825	0.922277	1.28211e-05	-2.19854	0.0243707	DP	Bacopaside I	TFPI2|209278_s_at	0.912539	0.00216091
B9D1	0.814768	0.681996	0.973389	0.023999	0.871076	0.00170412	UP	Bacopaside I	B9D1|205662_at	0.594942	0.0256547
SMAD5	1.3837	1.03898	1.84279	0.0263165	0.899666	9.29624e-05	UR	Bacopaside I	SMAD5|205188_s_at	1.13719	0.0167222
IFT57	0.734906	0.573439	0.941837	0.0149593	0.737613	0.0222441	UP	Bacopaside I	IFT57|218100_s_at	0.680717	0.00812725
HSPH1	1.29343	1.05363	1.5878	0.0139213	-1.18808	0.00799231	DR	Bacopaside I	HSPH1|206976_s_at	-0.72199	0.00161685
STAT5A	0.806238	0.674271	0.964033	0.018196	0.731619	0.0243399	UP	Bacopaside I	STAT5A|203010_at	2.16157	0.00902595
HNRNPA1	0.637302	0.448911	0.904754	0.0117421	0.573658	0.0153167	UP	Bacopaside I	HNRNPA1|222040_at	0.834185	0.0239879
BLK	0.899584	0.831928	0.972741	0.00798361	2.5648	0.000809085	UP	Bacopaside I	BLK|210934_at	3.24154	0.0313866
CYP1B1	0.884614	0.791722	0.988405	0.0303113	-0.793976	0.0081546	DP	Bacopaside I	CYP1B1|202434_s_at	-0.726925	0.046897
SLC39A8	0.836641	0.721053	0.970758	0.0187137	-1.11532	0.0210013	DP	Bacopaside I	SLC39A8|209267_s_at	1.06811	0.00120302
RDH16	1.11024	1.0195	1.20905	0.0162202	-0.87718	0.0361044	DR	Bacopaside I	RDH16|206753_at	-0.89303	0.0293474
PMAIP1	0.851132	0.758668	0.954864	0.00601239	1.99112	0.0240982	UP	Bacopaside I	PMAIP1|204285_s_at	-1.0969	0.0244918
PMAIP1	0.851132	0.758668	0.954864	0.00601239	1.99112	0.0240982	UP	Bacopaside I	PMAIP1|204286_s_at	-1.16725	0.00501272
RPS11	0.712567	0.558205	0.909614	0.0065188	0.547105	0.0485921	UP	Bacopaside I	RPS11|213350_at	-0.655969	0.0164773
TNFAIP8	0.793556	0.658078	0.956926	0.0154803	1.1739	0.00583217	UP	Bacopaside I	TNFAIP8|208296_x_at	0.638722	0.0466836
TNFAIP8	0.793556	0.658078	0.956926	0.0154803	1.1739	0.00583217	UP	Bacopaside I	TNFAIP8|210260_s_at	0.556783	0.00241582
NTRK2	0.902823	0.831126	0.980706	0.0154597	1.26225	0.00347418	UP	Bacopaside I	NTRK2|207152_at	2.85216	0.00204257
NTRK2	0.902823	0.831126	0.980706	0.0154597	1.26225	0.00347418	UP	Bacopaside I	NTRK2|221796_at	-3.4383	0.0284721
C11orf49	0.750902	0.58503	0.963803	0.0244836	0.741324	0.00532389	UP	Bacopaside I	C11orf49|203257_s_at	-0.588385	0.016293
ACSL1	1.14576	1.00279	1.30912	0.0454038	0.692807	0.0392709	UR	Bacopaside I	ACSL1|201963_at	0.569636	0.0291404
ZFP36L2	0.83299	0.698995	0.99267	0.0411334	1.21225	0.00710625	UP	Bacopaside I	ZFP36L2|201369_s_at	0.555252	0.0304119
C2CD2	1.2626	1.03022	1.54741	0.0246529	1.59717	0.0377865	UR	Bacopaside I	C2CD2|212875_s_at	0.532953	0.0360912
UBXN1	0.732303	0.595967	0.899826	0.0030347	0.632671	0.0467226	UP	Bacopaside I	UBXN1|210623_at	-0.590404	0.0298366
STK17A	0.720604	0.565252	0.918653	0.00817336	-0.517328	0.0315696	DP	Bacopaside I	STK17A|202694_at	1.12332	0.0245743
RASGRP1	0.897784	0.817382	0.986095	0.0242915	1.59482	0.0431577	UP	Bacopaside I	RASGRP1|205590_at	0.626784	0.0120084
EGR3	0.887756	0.813796	0.968438	0.00730609	1.48483	0.0198331	UP	Bacopaside I	EGR3|206115_at	-0.885851	0.00946063
IFITM1	0.887122	0.790355	0.995736	0.0421059	1.82296	0.00450551	UP	Bacopaside I	IFITM1|201601_x_at	-0.814145	0.0280211
IFITM1	0.887122	0.790355	0.995736	0.0421059	1.82296	0.00450551	UP	Bacopaside I	IFITM1|214022_s_at	-0.830193	0.0024251
WWOX	1.25767	1.09301	1.44713	0.00136392	1.17696	0.009425	UR	Bacopaside I	WWOX|210695_s_at	0.864663	0.0149032
WWOX	1.25767	1.09301	1.44713	0.00136392	1.17696	0.009425	UR	Bacopaside I	WWOX|219077_s_at	1.39312	0.0146926
THTPA	0.786704	0.622502	0.994218	0.0445888	-0.500404	0.00768438	DP	Bacopaside I	THTPA|218540_at	-1.12388	0.0165004
MATK	0.879911	0.805265	0.961475	0.00467567	0.632765	0.0277852	UP	Protocatechuic aldehyde	MATK|206267_s_at	-0.673712	0.0430419
TP63	0.895433	0.835731	0.959399	0.00170513	2.45926	0.00352212	UP	Protocatechuic aldehyde	TP63|209863_s_at	-0.542197	0.0228849
TP63	0.895433	0.835731	0.959399	0.00170513	2.45926	0.00352212	UP	Protocatechuic aldehyde	TP63|211834_s_at	-2.49506	0.0380842
SDHA	1.39579	1.0287	1.89387	0.0322159	0.56835	0.00579423	UR	Protocatechuic aldehyde	SDHA|201093_x_at	0.552429	0.0151046
TFPI2	0.863383	0.80825	0.922277	1.28211e-05	-2.19854	0.0243707	DP	Protocatechuic aldehyde	TFPI2|209278_s_at	0.955366	0.00410615
B9D1	0.814768	0.681996	0.973389	0.023999	0.871076	0.00170412	UP	Protocatechuic aldehyde	B9D1|210534_s_at	0.527179	0.0132097
CHORDC1	1.35337	1.08461	1.68874	0.00738307	-0.766173	0.00656369	DR	Protocatechuic aldehyde	CHORDC1|218566_s_at	-0.583924	0.0418092
GBP1	0.870173	0.779125	0.971861	0.0136581	1.76729	0.0118094	UP	Protocatechuic aldehyde	GBP1|202270_at	3.22194	0.0499735
HSPH1	1.29343	1.05363	1.5878	0.0139213	-1.18808	0.00799231	DR	Protocatechuic aldehyde	HSPH1|206976_s_at	-0.684139	0.00208687
STAT5A	0.806238	0.674271	0.964033	0.018196	0.731619	0.0243399	UP	Protocatechuic aldehyde	STAT5A|203010_at	1.83807	0.0144307
BST2	0.902419	0.815255	0.998902	0.0475742	1.43158	0.00292765	UP	Protocatechuic aldehyde	BST2|201641_at	-2.22086	0.0368401
CCNA1	0.847772	0.765215	0.939235	0.00158196	1.18635	0.019463	UP	Protocatechuic aldehyde	CCNA1|205899_at	2.85306	0.0377457
HNRNPA1	0.637302	0.448911	0.904754	0.0117421	0.573658	0.0153167	UP	Protocatechuic aldehyde	HNRNPA1|221919_at	-0.953102	0.00434431
HNRNPA1	0.637302	0.448911	0.904754	0.0117421	0.573658	0.0153167	UP	Protocatechuic aldehyde	HNRNPA1|222040_at	0.840868	0.0289005
PMAIP1	0.851132	0.758668	0.954864	0.00601239	1.99112	0.0240982	UP	Protocatechuic aldehyde	PMAIP1|204285_s_at	-0.78338	0.00805679
PMAIP1	0.851132	0.758668	0.954864	0.00601239	1.99112	0.0240982	UP	Protocatechuic aldehyde	PMAIP1|204286_s_at	-0.898212	0.014576
RPS11	0.712567	0.558205	0.909614	0.0065188	0.547105	0.0485921	UP	Protocatechuic aldehyde	RPS11|213350_at	-1.01724	0.00794243
NTRK2	0.902823	0.831126	0.980706	0.0154597	1.26225	0.00347418	UP	Protocatechuic aldehyde	NTRK2|207152_at	2.61684	0.03704
ZFP36L2	0.83299	0.698995	0.99267	0.0411334	1.21225	0.00710625	UP	Protocatechuic aldehyde	ZFP36L2|201369_s_at	0.514406	0.0419958
LSS	1.27938	1.01217	1.61715	0.0392893	-0.801765	0.00818827	DR	Protocatechuic aldehyde	LSS|202245_at	0.719641	0.0127592
STK17A	0.720604	0.565252	0.918653	0.00817336	-0.517328	0.0315696	DP	Protocatechuic aldehyde	STK17A|202693_s_at	-0.539908	0.0388607
GSTM4	0.728221	0.618568	0.857311	0.000139574	1.03388	0.00560629	UP	Protocatechuic aldehyde	GSTM4|210912_x_at	-0.645702	0.037298
ATF5	0.791604	0.628565	0.996931	0.0470238	-0.61731	0.00214719	DP	Protocatechuic aldehyde	ATF5|204999_s_at	0.502955	0.0181502
TP53I11	1.31094	1.04761	1.64047	0.0179584	0.623038	0.0143908	UR	Protocatechuic aldehyde	TP53I11|216919_at	1.28688	0.0374063
SCUBE2	0.945437	0.898299	0.995048	0.0315401	-1.15654	0.00740076	DP	Protocatechuic aldehyde	SCUBE2|219197_s_at	0.510995	0.0045858
EIF3F	0.685702	0.502515	0.935667	0.0173467	0.50653	0.0236911	UP	Protocatechuic aldehyde	EIF3F|200865_at	-2.57685	0.0187545
EGR3	0.887756	0.813796	0.968438	0.00730609	1.48483	0.0198331	UP	Protocatechuic aldehyde	EGR3|206115_at	-0.911127	0.0143614
UBA7	0.756256	0.645348	0.886224	0.000554958	0.903451	0.00232153	UP	Protocatechuic aldehyde	UBA7|1294_at	-2.40582	0.0326736
IFITM1	0.887122	0.790355	0.995736	0.0421059	1.82296	0.00450551	UP	Protocatechuic aldehyde	IFITM1|201601_x_at	-0.600314	0.021493
IFITM1	0.887122	0.790355	0.995736	0.0421059	1.82296	0.00450551	UP	Protocatechuic aldehyde	IFITM1|214022_s_at	-0.780547	0.034957
WWOX	1.25767	1.09301	1.44713	0.00136392	1.17696	0.009425	UR	Protocatechuic aldehyde	WWOX|210695_s_at	1.04922	0.00179285
WWOX	1.25767	1.09301	1.44713	0.00136392	1.17696	0.009425	UR	Protocatechuic aldehyde	WWOX|219077_s_at	1.23748	0.0142449
ERCC1	0.668625	0.495232	0.902727	0.00858632	0.798187	0.036459	UP	Tanshinone IIA	ERCC1|203720_s_at	0.697474	0.0124505
ATP6V1H	1.4151	1.10445	1.81312	0.00604006	-0.647518	0.0045928	DR	Tanshinone IIA	ATP6V1H|221504_s_at	0.617265	0.0056287
IL17RB	0.869437	0.762472	0.991408	0.0367268	-0.814825	0.0268579	DP	Tanshinone IIA	IL17RB|219255_x_at	-1.00533	0.0179733
SYT1	0.935468	0.883442	0.990557	0.0223158	0.702441	0.0227156	UP	Tanshinone IIA	SYT1|203998_s_at	1.12566	0.0189752
ATP6AP1	1.31326	1.0099	1.70775	0.0420083	-0.603343	0.0143174	DR	Tanshinone IIA	ATP6AP1|207809_s_at	0.564828	0.0329031
HSP90AA1	1.45205	1.16126	1.81567	0.00107115	-0.837049	0.012135	DR	Tanshinone IIA	HSP90AA1|210211_s_at	-0.627927	0.0110624
HSP90AA1	1.45205	1.16126	1.81567	0.00107115	-0.837049	0.012135	DR	Tanshinone IIA	HSP90AA1|214328_s_at	-0.758643	0.0115153
ATG4A	1.7216	1.24298	2.38452	0.00108041	-0.659957	0.0306252	DR	Tanshinone IIA	ATG4A|213115_at	-0.91651	0.0197787
SQLE	1.17109	1.01247	1.35455	0.0334286	-1.23331	0.00275383	DR	Tanshinone IIA	SQLE|213562_s_at	0.959569	0.0417641
SQLE	1.17109	1.01247	1.35455	0.0334286	-1.23331	0.00275383	DR	Tanshinone IIA	SQLE|213577_at	0.864446	0.00748389
TFPI2	0.863383	0.80825	0.922277	1.28211e-05	-2.19854	0.0243707	DP	Tanshinone IIA	TFPI2|209278_s_at	0.958317	0.0304143
B9D1	0.814768	0.681996	0.973389	0.023999	0.871076	0.00170412	UP	Tanshinone IIA	B9D1|205662_at	0.629913	0.0124429
LIFR	0.851201	0.755113	0.959516	0.00838425	-0.619908	0.0155398	DP	Tanshinone IIA	LIFR|205876_at	2.26662	0.0108646
SMAD5	1.3837	1.03898	1.84279	0.0263165	0.899666	9.29624e-05	UR	Tanshinone IIA	SMAD5|205187_at	1.98597	0.00263619
SMAD5	1.3837	1.03898	1.84279	0.0263165	0.899666	9.29624e-05	UR	Tanshinone IIA	SMAD5|205188_s_at	2.23445	0.000583694
NKTR	0.782871	0.613967	0.998241	0.0483634	-0.857731	0.029324	DP	Tanshinone IIA	NKTR|215338_s_at	0.57123	0.0426109
WLS	0.858826	0.768849	0.959332	0.007034	2.90317	0.0246185	UP	Tanshinone IIA	WLS|221958_s_at	1.18059	0.0321905
HSPH1	1.29343	1.05363	1.5878	0.0139213	-1.18808	0.00799231	DR	Tanshinone IIA	HSPH1|206976_s_at	-0.83019	0.000599536
HSPH1	1.29343	1.05363	1.5878	0.0139213	-1.18808	0.00799231	DR	Tanshinone IIA	HSPH1|208744_x_at	1.10537	0.0206302
NFE2	0.837903	0.760061	0.923719	0.000378044	0.95057	0.0197538	UP	Tanshinone IIA	NFE2|209930_s_at	3.56496	0.00564957
TMEM115	0.723807	0.535158	0.978956	0.0359041	-0.585763	0.00474606	DP	Tanshinone IIA	TMEM115|216267_s_at	0.682617	0.0473316
STAT5A	0.806238	0.674271	0.964033	0.018196	0.731619	0.0243399	UP	Tanshinone IIA	STAT5A|203010_at	2.36162	0.00111803
SGCE	0.883745	0.789227	0.989583	0.0322412	1.64272	0.00510119	UP	Tanshinone IIA	SGCE|204688_at	-1.12673	0.0360259
BST2	0.902419	0.815255	0.998902	0.0475742	1.43158	0.00292765	UP	Tanshinone IIA	BST2|201641_at	-4.61032	0.00345479
CCNA1	0.847772	0.765215	0.939235	0.00158196	1.18635	0.019463	UP	Tanshinone IIA	CCNA1|205899_at	3.57682	0.00699783
ZFC3H1	1.39418	1.07737	1.80416	0.0115185	0.542347	0.0107448	UR	Tanshinone IIA	ZFC3H1|213065_at	-0.707788	0.0252553
HNRNPA1	0.637302	0.448911	0.904754	0.0117421	0.573658	0.0153167	UP	Tanshinone IIA	HNRNPA1|222040_at	1.28424	0.00989865
MICAL1	0.798048	0.663271	0.960212	0.0168416	-1.17499	0.000910863	DP	Tanshinone IIA	MICAL1|218376_s_at	-0.602493	0.0229393
BLK	0.899584	0.831928	0.972741	0.00798361	2.5648	0.000809085	UP	Tanshinone IIA	BLK|206255_at	1.39477	0.0228124
BLK	0.899584	0.831928	0.972741	0.00798361	2.5648	0.000809085	UP	Tanshinone IIA	BLK|210934_at	3.60032	0.0220944
RDX	1.24084	1.0063	1.53003	0.0435123	2.1846	0.00762614	UR	Tanshinone IIA	RDX|204969_s_at	0.834706	0.0150216
RDX	1.24084	1.0063	1.53003	0.0435123	2.1846	0.00762614	UR	Tanshinone IIA	RDX|212398_at	0.943074	0.0137365
CYP1B1	0.884614	0.791722	0.988405	0.0303113	-0.793976	0.0081546	DP	Tanshinone IIA	CYP1B1|202435_s_at	1.3112	0.00557541
CYP1B1	0.884614	0.791722	0.988405	0.0303113	-0.793976	0.0081546	DP	Tanshinone IIA	CYP1B1|202436_s_at	0.947512	0.00687717
CYP1B1	0.884614	0.791722	0.988405	0.0303113	-0.793976	0.0081546	DP	Tanshinone IIA	CYP1B1|202437_s_at	1.18633	0.0200727
ESR2	0.773404	0.646698	0.924935	0.00488153	-1.09315	0.0168113	DP	Tanshinone IIA	ESR2|211117_x_at	3.7281	0.0448375
RPS11	0.712567	0.558205	0.909614	0.0065188	0.547105	0.0485921	UP	Tanshinone IIA	RPS11|213350_at	-2.44285	0.0139968
NTRK2	0.902823	0.831126	0.980706	0.0154597	1.26225	0.00347418	UP	Tanshinone IIA	NTRK2|207152_at	3.33459	0.000883646
C11orf49	0.750902	0.58503	0.963803	0.0244836	0.741324	0.00532389	UP	Tanshinone IIA	C11orf49|203257_s_at	-0.716034	0.00336377
PAK1	0.778242	0.632695	0.957271	0.0176278	1.44611	0.0053251	UP	Tanshinone IIA	PAK1|209615_s_at	0.70917	0.0439843
PDCD4	0.809773	0.700083	0.93665	0.00449418	0.806707	0.0418405	UP	Tanshinone IIA	PDCD4|212594_at	-0.836183	0.0391935
ACSL1	1.14576	1.00279	1.30912	0.0454038	0.692807	0.0392709	UR	Tanshinone IIA	ACSL1|201963_at	0.846484	0.0153796
CABYR	0.821544	0.713662	0.945735	0.00620507	-0.731189	0.0150192	DP	Tanshinone IIA	CABYR|219928_s_at	0.862155	0.0238659
GBP2	0.786174	0.681481	0.90695	0.000968757	-1.58394	0.00506479	DP	Tanshinone IIA	GBP2|202748_at	-0.570049	0.0118615
CCT2	1.27593	1.00278	1.62349	0.0474168	-0.530121	0.0395902	DR	Tanshinone IIA	CCT2|201946_s_at	0.818132	5.5226e-08
GSTM4	0.728221	0.618568	0.857311	0.000139574	1.03388	0.00560629	UP	Tanshinone IIA	GSTM4|210912_x_at	0.565004	0.0436736
TCTN2	0.788816	0.640573	0.971365	0.0255159	1.35085	0.000627153	UP	Tanshinone IIA	TCTN2|206438_x_at	0.74756	0.020738
TLN2	0.833613	0.695783	0.998745	0.0484298	-0.927363	0.00221108	DP	Tanshinone IIA	TLN2|212701_at	-0.972551	0.0486441
RASGRP1	0.897784	0.817382	0.986095	0.0242915	1.59482	0.0431577	UP	Tanshinone IIA	RASGRP1|205590_at	0.744521	0.0109191
PSMD1	1.57189	1.08944	2.26799	0.015608	-0.720859	0.0182201	DR	Tanshinone IIA	PSMD1|201199_s_at	-0.652865	0.00849199
FAM131A	0.750821	0.58701	0.960346	0.0224792	-3.86772	0.00427204	DP	Tanshinone IIA	FAM131A|221904_at	-0.622221	0.0322465
EIF3F	0.685702	0.502515	0.935667	0.0173467	0.50653	0.0236911	UP	Tanshinone IIA	EIF3F|200865_at	-2.90077	0.0143504
EGR3	0.887756	0.813796	0.968438	0.00730609	1.48483	0.0198331	UP	Tanshinone IIA	EGR3|206115_at	0.928235	0.0101292
SIAH2	0.759912	0.646104	0.893767	0.000910778	0.720591	0.0280097	UP	Tanshinone IIA	SIAH2|209339_at	0.905073	0.00870071
JRKL	1.20983	1.03499	1.41421	0.0167678	1.06378	0.00534918	UR	Tanshinone IIA	JRKL|206734_at	-0.701918	0.00546764
WWOX	1.25767	1.09301	1.44713	0.00136392	1.17696	0.009425	UR	Tanshinone IIA	WWOX|210695_s_at	0.775897	0.00704201
WWOX	1.25767	1.09301	1.44713	0.00136392	1.17696	0.009425	UR	Tanshinone IIA	WWOX|219077_s_at	0.671239	0.0456252
ZNF75D	1.46618	1.08796	1.97589	0.0119444	0.568738	0.0131017	UR	Tanshinone IIA	ZNF75D|214813_at	0.910049	0.0439545
EIF4EBP1	1.16139	1.01819	1.32474	0.0258554	0.783759	0.0129625	UR	Tanshinone IIA	EIF4EBP1|221539_at	0.701454	0.0237108
SERPINA1	0.833568	0.762578	0.911167	6.11255e-05	1.83109	0.0415314	UP	Tanshinone IIA	SERPINA1|211428_at	3.68895	0.00967053
SERPINA1	0.833568	0.762578	0.911167	6.11255e-05	1.83109	0.0415314	UP	Tanshinone IIA	SERPINA1|211429_s_at	0.952576	0.0110975
CHMP4A	0.661593	0.516539	0.84738	0.00107012	-0.687267	0.00761658	DP	Tanshinone IIA	CHMP4A|218571_s_at	-0.556739	0.0207474
THTPA	0.786704	0.622502	0.994218	0.0445888	-0.500404	0.00768438	DP	Tanshinone IIA	THTPA|218540_at	-0.782296	0.0128749
RABGAP1	1.56255	1.09185	2.23618	0.0146684	0.658677	0.00365847	UR	(+)2-(1-hydroxyl-4-oxocyclohexyl) ethyl caffeate	RABGAP1|204028_s_at	-0.697105	0.0291443
ERCC1	0.668625	0.495232	0.902727	0.00858632	0.798187	0.036459	UP	(+)2-(1-hydroxyl-4-oxocyclohexyl) ethyl caffeate	ERCC1|203720_s_at	0.870116	0.00422658
CYP24A1	0.868571	0.79927	0.943881	0.000895906	4.50911	0.00626847	UP	(+)2-(1-hydroxyl-4-oxocyclohexyl) ethyl caffeate	CYP24A1|206504_at	-1.08827	0.00948461
PEX3	1.38991	1.0576	1.82663	0.0181907	-0.663254	0.0311167	DR	(+)2-(1-hydroxyl-4-oxocyclohexyl) ethyl caffeate	PEX3|203969_at	-0.565087	0.00456674
CYBA	0.856253	0.754196	0.972119	0.0165452	3.09865	0.00618658	UP	(+)2-(1-hydroxyl-4-oxocyclohexyl) ethyl caffeate	CYBA|203028_s_at	0.509985	0.00866866
SYT1	0.935468	0.883442	0.990557	0.0223158	0.702441	0.0227156	UP	(+)2-(1-hydroxyl-4-oxocyclohexyl) ethyl caffeate	SYT1|203998_s_at	-2.37733	0.0292928
RASGRP2	0.90381	0.817214	0.999582	0.0490565	1.74272	0.000176205	UP	(+)2-(1-hydroxyl-4-oxocyclohexyl) ethyl caffeate	RASGRP2|208206_s_at	-2.21411	0.0256154
ATP6AP1	1.31326	1.0099	1.70775	0.0420083	-0.603343	0.0143174	DR	(+)2-(1-hydroxyl-4-oxocyclohexyl) ethyl caffeate	ATP6AP1|207809_s_at	0.771949	0.00452082
HSP90AA1	1.45205	1.16126	1.81567	0.00107115	-0.837049	0.012135	DR	(+)2-(1-hydroxyl-4-oxocyclohexyl) ethyl caffeate	HSP90AA1|211969_at	-0.80021	0.000964489
SQLE	1.17109	1.01247	1.35455	0.0334286	-1.23331	0.00275383	DR	(+)2-(1-hydroxyl-4-oxocyclohexyl) ethyl caffeate	SQLE|213562_s_at	1.53667	0.0377088
SQLE	1.17109	1.01247	1.35455	0.0334286	-1.23331	0.00275383	DR	(+)2-(1-hydroxyl-4-oxocyclohexyl) ethyl caffeate	SQLE|213577_at	-0.991078	0.00521127
CADM4	0.827547	0.714254	0.95881	0.0117384	1.13849	0.00103286	UP	(+)2-(1-hydroxyl-4-oxocyclohexyl) ethyl caffeate	CADM4|214267_s_at	-4.23572	0.0114017
TFPI2	0.863383	0.80825	0.922277	1.28211e-05	-2.19854	0.0243707	DP	(+)2-(1-hydroxyl-4-oxocyclohexyl) ethyl caffeate	TFPI2|209278_s_at	-1.26511	0.000946501
SMAD5	1.3837	1.03898	1.84279	0.0263165	0.899666	9.29624e-05	UR	(+)2-(1-hydroxyl-4-oxocyclohexyl) ethyl caffeate	SMAD5|205187_at	-0.764129	0.0300593
IFT57	0.734906	0.573439	0.941837	0.0149593	0.737613	0.0222441	UP	(+)2-(1-hydroxyl-4-oxocyclohexyl) ethyl caffeate	IFT57|218100_s_at	-0.607343	0.0480211
ROPN1B	0.926409	0.868646	0.988013	0.0199603	1.75644	0.0134835	UP	(+)2-(1-hydroxyl-4-oxocyclohexyl) ethyl caffeate	ROPN1B|220425_x_at	-2.1691	0.0461663
NKTR	0.782871	0.613967	0.998241	0.0483634	-0.857731	0.029324	DP	(+)2-(1-hydroxyl-4-oxocyclohexyl) ethyl caffeate	NKTR|202379_s_at	-0.891226	0.0120284
NKTR	0.782871	0.613967	0.998241	0.0483634	-0.857731	0.029324	DP	(+)2-(1-hydroxyl-4-oxocyclohexyl) ethyl caffeate	NKTR|215338_s_at	-0.848354	0.0444433
RPL5	0.677671	0.529342	0.867563	0.00202079	0.595441	0.0299195	UP	(+)2-(1-hydroxyl-4-oxocyclohexyl) ethyl caffeate	RPL5|210034_s_at	-0.577939	0.0049297
STAT5A	0.806238	0.674271	0.964033	0.018196	0.731619	0.0243399	UP	(+)2-(1-hydroxyl-4-oxocyclohexyl) ethyl caffeate	STAT5A|203010_at	1.3194	0.0413547
SGCE	0.883745	0.789227	0.989583	0.0322412	1.64272	0.00510119	UP	(+)2-(1-hydroxyl-4-oxocyclohexyl) ethyl caffeate	SGCE|204688_at	-1.16008	0.0449771
CDKN1C	0.85026	0.741928	0.974409	0.0196601	2.51059	0.00922802	UP	(+)2-(1-hydroxyl-4-oxocyclohexyl) ethyl caffeate	CDKN1C|216894_x_at	-2.3729	0.00828734
BST2	0.902419	0.815255	0.998902	0.0475742	1.43158	0.00292765	UP	(+)2-(1-hydroxyl-4-oxocyclohexyl) ethyl caffeate	BST2|201641_at	-1.72526	0.0039487
HNRNPA1	0.637302	0.448911	0.904754	0.0117421	0.573658	0.0153167	UP	(+)2-(1-hydroxyl-4-oxocyclohexyl) ethyl caffeate	HNRNPA1|221919_at	0.941149	0.00398862
HNRNPA1	0.637302	0.448911	0.904754	0.0117421	0.573658	0.0153167	UP	(+)2-(1-hydroxyl-4-oxocyclohexyl) ethyl caffeate	HNRNPA1|222040_at	0.618118	0.0451587
MICAL1	0.798048	0.663271	0.960212	0.0168416	-1.17499	0.000910863	DP	(+)2-(1-hydroxyl-4-oxocyclohexyl) ethyl caffeate	MICAL1|218376_s_at	0.506785	0.0148511
CNPY3	0.743482	0.569517	0.970585	0.0292949	-0.5073	0.0165277	DP	(+)2-(1-hydroxyl-4-oxocyclohexyl) ethyl caffeate	CNPY3|217931_at	0.976844	0.00121797
RDX	1.24084	1.0063	1.53003	0.0435123	2.1846	0.00762614	UR	(+)2-(1-hydroxyl-4-oxocyclohexyl) ethyl caffeate	RDX|212397_at	-0.675283	0.00254428
CYP1B1	0.884614	0.791722	0.988405	0.0303113	-0.793976	0.0081546	DP	(+)2-(1-hydroxyl-4-oxocyclohexyl) ethyl caffeate	CYP1B1|202434_s_at	2.13976	0.00115082
CYP1B1	0.884614	0.791722	0.988405	0.0303113	-0.793976	0.0081546	DP	(+)2-(1-hydroxyl-4-oxocyclohexyl) ethyl caffeate	CYP1B1|202435_s_at	-0.57428	0.00828052
CYP1B1	0.884614	0.791722	0.988405	0.0303113	-0.793976	0.0081546	DP	(+)2-(1-hydroxyl-4-oxocyclohexyl) ethyl caffeate	CYP1B1|202436_s_at	-0.529933	0.00242039
RPS11	0.712567	0.558205	0.909614	0.0065188	0.547105	0.0485921	UP	(+)2-(1-hydroxyl-4-oxocyclohexyl) ethyl caffeate	RPS11|213350_at	-2.14061	0.0024085
TNFAIP8	0.793556	0.658078	0.956926	0.0154803	1.1739	0.00583217	UP	(+)2-(1-hydroxyl-4-oxocyclohexyl) ethyl caffeate	TNFAIP8|210260_s_at	-0.644156	0.030139
NTRK2	0.902823	0.831126	0.980706	0.0154597	1.26225	0.00347418	UP	(+)2-(1-hydroxyl-4-oxocyclohexyl) ethyl caffeate	NTRK2|207152_at	3.02411	0.00143805
PAK1	0.778242	0.632695	0.957271	0.0176278	1.44611	0.0053251	UP	(+)2-(1-hydroxyl-4-oxocyclohexyl) ethyl caffeate	PAK1|209615_s_at	0.600456	0.0230264
PDCD4	0.809773	0.700083	0.93665	0.00449418	0.806707	0.0418405	UP	(+)2-(1-hydroxyl-4-oxocyclohexyl) ethyl caffeate	PDCD4|202731_at	1.06899	0.0329312
ZFP36L2	0.83299	0.698995	0.99267	0.0411334	1.21225	0.00710625	UP	(+)2-(1-hydroxyl-4-oxocyclohexyl) ethyl caffeate	ZFP36L2|201368_at	-0.692134	0.00304767
C2CD2	1.2626	1.03022	1.54741	0.0246529	1.59717	0.0377865	UR	(+)2-(1-hydroxyl-4-oxocyclohexyl) ethyl caffeate	C2CD2|212875_s_at	-0.5466	0.0256834
LSS	1.27938	1.01217	1.61715	0.0392893	-0.801765	0.00818827	DR	(+)2-(1-hydroxyl-4-oxocyclohexyl) ethyl caffeate	LSS|202245_at	0.654264	0.0151076
NPY1R	0.929391	0.885143	0.975851	0.00325952	2.8446	0.032752	UP	(+)2-(1-hydroxyl-4-oxocyclohexyl) ethyl caffeate	NPY1R|205440_s_at	-1.14816	0.000265257
GNG4	0.90509	0.84173	0.973219	0.00708	2.79913	0.0395606	UP	(+)2-(1-hydroxyl-4-oxocyclohexyl) ethyl caffeate	GNG4|205184_at	-0.988284	0.0107565
TCTN2	0.788816	0.640573	0.971365	0.0255159	1.35085	0.000627153	UP	(+)2-(1-hydroxyl-4-oxocyclohexyl) ethyl caffeate	TCTN2|206438_x_at	0.823348	0.0189732
RASGRP1	0.897784	0.817382	0.986095	0.0242915	1.59482	0.0431577	UP	(+)2-(1-hydroxyl-4-oxocyclohexyl) ethyl caffeate	RASGRP1|205590_at	-1.92661	0.00213666
SCUBE2	0.945437	0.898299	0.995048	0.0315401	-1.15654	0.00740076	DP	(+)2-(1-hydroxyl-4-oxocyclohexyl) ethyl caffeate	SCUBE2|219197_s_at	0.732623	0.00337888
NDUFAF3	0.794521	0.631881	0.999023	0.0490307	-0.707824	0.0087317	DP	(+)2-(1-hydroxyl-4-oxocyclohexyl) ethyl caffeate	NDUFAF3|209177_at	0.596986	0.0040423
CALML3	0.926957	0.880579	0.975777	0.00377577	1.16309	0.0187678	UP	(+)2-(1-hydroxyl-4-oxocyclohexyl) ethyl caffeate	CALML3|210020_x_at	-0.655707	0.00109626
EGR3	0.887756	0.813796	0.968438	0.00730609	1.48483	0.0198331	UP	(+)2-(1-hydroxyl-4-oxocyclohexyl) ethyl caffeate	EGR3|206115_at	1.04172	0.0102983
SIAH2	0.759912	0.646104	0.893767	0.000910778	0.720591	0.0280097	UP	(+)2-(1-hydroxyl-4-oxocyclohexyl) ethyl caffeate	SIAH2|209339_at	0.929373	0.00431507
PCYT2	0.711332	0.564688	0.896059	0.00383174	-1.16089	0.00985985	DP	(+)2-(1-hydroxyl-4-oxocyclohexyl) ethyl caffeate	PCYT2|209577_at	0.792321	0.0353258
EIF4EBP1	1.16139	1.01819	1.32474	0.0258554	0.783759	0.0129625	UR	(+)2-(1-hydroxyl-4-oxocyclohexyl) ethyl caffeate	EIF4EBP1|221539_at	0.532388	0.0384514
SERPINA1	0.833568	0.762578	0.911167	6.11255e-05	1.83109	0.0415314	UP	(+)2-(1-hydroxyl-4-oxocyclohexyl) ethyl caffeate	SERPINA1|211428_at	3.6574	0.0097583
SERPINA1	0.833568	0.762578	0.911167	6.11255e-05	1.83109	0.0415314	UP	(+)2-(1-hydroxyl-4-oxocyclohexyl) ethyl caffeate	SERPINA1|211429_s_at	1.51202	0.000750852
LY6G5C	0.83682	0.705237	0.992954	0.041253	-0.882802	0.0172129	DP	(+)2-(1-hydroxyl-4-oxocyclohexyl) ethyl caffeate	LY6G5C|219860_at	0.724562	0.0469351
MICB	0.867332	0.760993	0.988531	0.0329394	-2.30236	0.00351529	DP	(+)2-(1-hydroxyl-4-oxocyclohexyl) ethyl caffeate	MICB|206247_at	0.635598	0.0399599
PEX3	1.38991	1.0576	1.82663	0.0181907	-0.663254	0.0311167	DR	Benzoylhypaconitine	PEX3|203969_at	-0.740993	0.0326679
CYBA	0.856253	0.754196	0.972119	0.0165452	3.09865	0.00618658	UP	Benzoylhypaconitine	CYBA|203028_s_at	0.553115	0.0185654
RFXANK	0.757901	0.596604	0.962805	0.023182	0.673415	0.00288057	UP	Benzoylhypaconitine	RFXANK|202758_s_at	0.654942	0.0111266
SYT1	0.935468	0.883442	0.990557	0.0223158	0.702441	0.0227156	UP	Benzoylhypaconitine	SYT1|203998_s_at	-0.884391	0.0233258
RASGRP2	0.90381	0.817214	0.999582	0.0490565	1.74272	0.000176205	UP	Benzoylhypaconitine	RASGRP2|208206_s_at	-1.23269	0.0451556
ATP6AP1	1.31326	1.0099	1.70775	0.0420083	-0.603343	0.0143174	DR	Benzoylhypaconitine	ATP6AP1|207809_s_at	0.737394	0.0039448
TP63	0.895433	0.835731	0.959399	0.00170513	2.45926	0.00352212	UP	Benzoylhypaconitine	TP63|209863_s_at	-1.28262	0.0483364
HSP90AA1	1.45205	1.16126	1.81567	0.00107115	-0.837049	0.012135	DR	Benzoylhypaconitine	HSP90AA1|210211_s_at	-0.622152	0.0247802
HSP90AA1	1.45205	1.16126	1.81567	0.00107115	-0.837049	0.012135	DR	Benzoylhypaconitine	HSP90AA1|211968_s_at	0.712231	0.0185437
HSP90AA1	1.45205	1.16126	1.81567	0.00107115	-0.837049	0.012135	DR	Benzoylhypaconitine	HSP90AA1|211969_at	-0.60107	0.00414739
HSP90AA1	1.45205	1.16126	1.81567	0.00107115	-0.837049	0.012135	DR	Benzoylhypaconitine	HSP90AA1|214328_s_at	-0.727223	0.00237832
TESC	0.871084	0.782908	0.969192	0.0112558	1.37269	0.0181298	UP	Benzoylhypaconitine	TESC|218872_at	0.576849	0.0322983
SQLE	1.17109	1.01247	1.35455	0.0334286	-1.23331	0.00275383	DR	Benzoylhypaconitine	SQLE|213562_s_at	1.33774	0.0217382
TFPI2	0.863383	0.80825	0.922277	1.28211e-05	-2.19854	0.0243707	DP	Benzoylhypaconitine	TFPI2|209278_s_at	-0.54581	0.0108006
LIFR	0.851201	0.755113	0.959516	0.00838425	-0.619908	0.0155398	DP	Benzoylhypaconitine	LIFR|205876_at	2.05186	0.00821553
RPL24	0.761286	0.593477	0.976545	0.031811	0.884703	0.0167652	UP	Benzoylhypaconitine	RPL24|200013_at	-0.608754	0.00386767
GBP1	0.870173	0.779125	0.971861	0.0136581	1.76729	0.0118094	UP	Benzoylhypaconitine	GBP1|202270_at	2.69071	0.0235928
RPS25	0.75896	0.603203	0.954935	0.0186008	0.755131	0.0341657	UP	Benzoylhypaconitine	RPS25|200091_s_at	-0.507827	0.0323143
RPL5	0.677671	0.529342	0.867563	0.00202079	0.595441	0.0299195	UP	Benzoylhypaconitine	RPL5|210034_s_at	-0.938928	0.0342501
RPL5	0.677671	0.529342	0.867563	0.00202079	0.595441	0.0299195	UP	Benzoylhypaconitine	RPL5|213080_x_at	-0.52194	0.045337
NFE2	0.837903	0.760061	0.923719	0.000378044	0.95057	0.0197538	UP	Benzoylhypaconitine	NFE2|209930_s_at	3.24781	0.00399112
STAT5A	0.806238	0.674271	0.964033	0.018196	0.731619	0.0243399	UP	Benzoylhypaconitine	STAT5A|203010_at	1.62078	0.0478874
APOL2	0.776288	0.633337	0.951505	0.0147406	-0.69624	0.0135996	DP	Benzoylhypaconitine	APOL2|221013_s_at	-2.02981	0.0364323
CCNA1	0.847772	0.765215	0.939235	0.00158196	1.18635	0.019463	UP	Benzoylhypaconitine	CCNA1|205899_at	2.83695	0.010966
HNRNPA1	0.637302	0.448911	0.904754	0.0117421	0.573658	0.0153167	UP	Benzoylhypaconitine	HNRNPA1|200016_x_at	-0.575578	0.00677376
HNRNPA1	0.637302	0.448911	0.904754	0.0117421	0.573658	0.0153167	UP	Benzoylhypaconitine	HNRNPA1|213356_x_at	-0.572399	0.0163792
HNRNPA1	0.637302	0.448911	0.904754	0.0117421	0.573658	0.0153167	UP	Benzoylhypaconitine	HNRNPA1|222040_at	0.641146	0.042597
MICAL1	0.798048	0.663271	0.960212	0.0168416	-1.17499	0.000910863	DP	Benzoylhypaconitine	MICAL1|218376_s_at	0.792442	0.00479892
REPS1	1.55073	1.16259	2.06846	0.00283656	-0.580046	0.0092244	DR	Benzoylhypaconitine	REPS1|215201_at	-1.47886	0.0453575
BLK	0.899584	0.831928	0.972741	0.00798361	2.5648	0.000809085	UP	Benzoylhypaconitine	BLK|210934_at	3.51433	0.0235085
CNPY3	0.743482	0.569517	0.970585	0.0292949	-0.5073	0.0165277	DP	Benzoylhypaconitine	CNPY3|217931_at	0.998302	0.011601
CYP1B1	0.884614	0.791722	0.988405	0.0303113	-0.793976	0.0081546	DP	Benzoylhypaconitine	CYP1B1|202435_s_at	-0.724719	0.00533329
CYP1B1	0.884614	0.791722	0.988405	0.0303113	-0.793976	0.0081546	DP	Benzoylhypaconitine	CYP1B1|202436_s_at	-0.677389	0.00293253
RPS11	0.712567	0.558205	0.909614	0.0065188	0.547105	0.0485921	UP	Benzoylhypaconitine	RPS11|213350_at	-2.52492	0.00172017
NTRK2	0.902823	0.831126	0.980706	0.0154597	1.26225	0.00347418	UP	Benzoylhypaconitine	NTRK2|207152_at	2.54668	0.0296811
PDCD4	0.809773	0.700083	0.93665	0.00449418	0.806707	0.0418405	UP	Benzoylhypaconitine	PDCD4|202731_at	1.17003	0.0231685
ZFP36L2	0.83299	0.698995	0.99267	0.0411334	1.21225	0.00710625	UP	Benzoylhypaconitine	ZFP36L2|201368_at	-0.562988	0.00408673
NPY1R	0.929391	0.885143	0.975851	0.00325952	2.8446	0.032752	UP	Benzoylhypaconitine	NPY1R|205440_s_at	-0.663459	0.00147749
RPS14	0.780611	0.616312	0.988708	0.0399616	0.910178	0.0284209	UP	Benzoylhypaconitine	RPS14|208645_s_at	-0.649164	0.00644485
CCT2	1.27593	1.00278	1.62349	0.0474168	-0.530121	0.0395902	DR	Benzoylhypaconitine	CCT2|201946_s_at	1.21201	0.000728385
RASGRP1	0.897784	0.817382	0.986095	0.0242915	1.59482	0.0431577	UP	Benzoylhypaconitine	RASGRP1|205590_at	-1.56838	0.00210262
SCUBE2	0.945437	0.898299	0.995048	0.0315401	-1.15654	0.00740076	DP	Benzoylhypaconitine	SCUBE2|219197_s_at	0.747624	0.00200024
EIF3F	0.685702	0.502515	0.935667	0.0173467	0.50653	0.0236911	UP	Benzoylhypaconitine	EIF3F|200865_at	-2.63327	0.0315595
NDUFAF3	0.794521	0.631881	0.999023	0.0490307	-0.707824	0.0087317	DP	Benzoylhypaconitine	NDUFAF3|209177_at	0.524026	0.00534453
EGR3	0.887756	0.813796	0.968438	0.00730609	1.48483	0.0198331	UP	Benzoylhypaconitine	EGR3|206115_at	0.764034	0.0214688
SIAH2	0.759912	0.646104	0.893767	0.000910778	0.720591	0.0280097	UP	Benzoylhypaconitine	SIAH2|209339_at	1.02872	0.0126741
TNFAIP2	0.849121	0.730359	0.987194	0.0333676	1.92497	0.00253009	UP	Benzoylhypaconitine	TNFAIP2|202510_s_at	-1.52815	0.0210217
IFITM1	0.887122	0.790355	0.995736	0.0421059	1.82296	0.00450551	UP	Benzoylhypaconitine	IFITM1|214022_s_at	-0.540608	0.00218286
EIF4EBP1	1.16139	1.01819	1.32474	0.0258554	0.783759	0.0129625	UR	Benzoylhypaconitine	EIF4EBP1|221539_at	0.523061	0.0437761
CACNA1H	1.11228	1.03596	1.19422	0.0033459	0.722256	0.0129306	UR	Benzoylhypaconitine	CACNA1H|205845_at	0.843379	0.0222872
SERPINA1	0.833568	0.762578	0.911167	6.11255e-05	1.83109	0.0415314	UP	Benzoylhypaconitine	SERPINA1|202833_s_at	0.961765	0.0279308
SERPINA1	0.833568	0.762578	0.911167	6.11255e-05	1.83109	0.0415314	UP	Benzoylhypaconitine	SERPINA1|211428_at	3.29284	0.00379843
SERPINA1	0.833568	0.762578	0.911167	6.11255e-05	1.83109	0.0415314	UP	Benzoylhypaconitine	SERPINA1|211429_s_at	1.79289	0.00294864
MICB	0.867332	0.760993	0.988531	0.0329394	-2.30236	0.00351529	DP	Benzoylhypaconitine	MICB|206247_at	0.787356	0.034562
MATK	0.879911	0.805265	0.961475	0.00467567	0.632765	0.0277852	UP	Paeoniflorin	MATK|206267_s_at	-0.847863	0.0320199
SYT1	0.935468	0.883442	0.990557	0.0223158	0.702441	0.0227156	UP	Paeoniflorin	SYT1|203998_s_at	0.831126	0.0155286
TP63	0.895433	0.835731	0.959399	0.00170513	2.45926	0.00352212	UP	Paeoniflorin	TP63|209863_s_at	0.903201	0.0390329
ATG4A	1.7216	1.24298	2.38452	0.00108041	-0.659957	0.0306252	DR	Paeoniflorin	ATG4A|213115_at	-0.921945	0.0489353
SQLE	1.17109	1.01247	1.35455	0.0334286	-1.23331	0.00275383	DR	Paeoniflorin	SQLE|213562_s_at	1.02236	0.0458149
SQLE	1.17109	1.01247	1.35455	0.0334286	-1.23331	0.00275383	DR	Paeoniflorin	SQLE|213577_at	1.01941	0.00460961
TFPI2	0.863383	0.80825	0.922277	1.28211e-05	-2.19854	0.0243707	DP	Paeoniflorin	TFPI2|209278_s_at	0.714515	0.0212253
B9D1	0.814768	0.681996	0.973389	0.023999	0.871076	0.00170412	UP	Paeoniflorin	B9D1|205662_at	0.751211	0.01729
B9D1	0.814768	0.681996	0.973389	0.023999	0.871076	0.00170412	UP	Paeoniflorin	B9D1|210534_s_at	0.73859	0.00613374
LIFR	0.851201	0.755113	0.959516	0.00838425	-0.619908	0.0155398	DP	Paeoniflorin	LIFR|205876_at	1.51455	0.0140779
SMAD5	1.3837	1.03898	1.84279	0.0263165	0.899666	9.29624e-05	UR	Paeoniflorin	SMAD5|205187_at	1.57421	0.0169241
SMAD5	1.3837	1.03898	1.84279	0.0263165	0.899666	9.29624e-05	UR	Paeoniflorin	SMAD5|205188_s_at	2.29475	0.005233
NKTR	0.782871	0.613967	0.998241	0.0483634	-0.857731	0.029324	DP	Paeoniflorin	NKTR|202379_s_at	0.742629	0.0271202
NKTR	0.782871	0.613967	0.998241	0.0483634	-0.857731	0.029324	DP	Paeoniflorin	NKTR|215338_s_at	1.03588	0.0165343
GBP1	0.870173	0.779125	0.971861	0.0136581	1.76729	0.0118094	UP	Paeoniflorin	GBP1|202270_at	2.96532	0.011901
HSPH1	1.29343	1.05363	1.5878	0.0139213	-1.18808	0.00799231	DR	Paeoniflorin	HSPH1|206976_s_at	-0.826225	0.00357209
HSPH1	1.29343	1.05363	1.5878	0.0139213	-1.18808	0.00799231	DR	Paeoniflorin	HSPH1|208744_x_at	1.27951	0.00894503
CDKN1C	0.85026	0.741928	0.974409	0.0196601	2.51059	0.00922802	UP	Paeoniflorin	CDKN1C|216894_x_at	-3.00376	0.0129503
BST2	0.902419	0.815255	0.998902	0.0475742	1.43158	0.00292765	UP	Paeoniflorin	BST2|201641_at	-2.01163	0.0423588
HNRNPA1	0.637302	0.448911	0.904754	0.0117421	0.573658	0.0153167	UP	Paeoniflorin	HNRNPA1|222040_at	0.979441	0.0189935
BLK	0.899584	0.831928	0.972741	0.00798361	2.5648	0.000809085	UP	Paeoniflorin	BLK|210934_at	4.44279	0.0150066
RDX	1.24084	1.0063	1.53003	0.0435123	2.1846	0.00762614	UR	Paeoniflorin	RDX|204969_s_at	0.841182	0.0497603
RDX	1.24084	1.0063	1.53003	0.0435123	2.1846	0.00762614	UR	Paeoniflorin	RDX|212398_at	1.10859	0.013232
RPS11	0.712567	0.558205	0.909614	0.0065188	0.547105	0.0485921	UP	Paeoniflorin	RPS11|213350_at	-2.634	0.00304071
NTRK2	0.902823	0.831126	0.980706	0.0154597	1.26225	0.00347418	UP	Paeoniflorin	NTRK2|207152_at	3.39687	0.00278527
ZFP36L2	0.83299	0.698995	0.99267	0.0411334	1.21225	0.00710625	UP	Paeoniflorin	ZFP36L2|201367_s_at	3.49356	0.0424857
ZFP36L2	0.83299	0.698995	0.99267	0.0411334	1.21225	0.00710625	UP	Paeoniflorin	ZFP36L2|201369_s_at	0.751155	0.0311009
CABYR	0.821544	0.713662	0.945735	0.00620507	-0.731189	0.0150192	DP	Paeoniflorin	CABYR|219928_s_at	0.772363	0.0248516
CCT2	1.27593	1.00278	1.62349	0.0474168	-0.530121	0.0395902	DR	Paeoniflorin	CCT2|201946_s_at	0.95422	0.00456919
KLK7	0.947965	0.899012	0.999582	0.0482223	4.69496	0.00833379	UP	Paeoniflorin	KLK7|205778_at	-2.6629	0.0463994
AZU1	0.9162	0.839788	0.999564	0.048864	0.835229	0.0284523	UP	Paeoniflorin	AZU1|214575_s_at	3.87983	0.0195898
RASGRP1	0.897784	0.817382	0.986095	0.0242915	1.59482	0.0431577	UP	Paeoniflorin	RASGRP1|205590_at	0.645264	0.0235305
TP53I11	1.31094	1.04761	1.64047	0.0179584	0.623038	0.0143908	UR	Paeoniflorin	TP53I11|216919_at	1.47777	0.000430366
SCUBE2	0.945437	0.898299	0.995048	0.0315401	-1.15654	0.00740076	DP	Paeoniflorin	SCUBE2|219197_s_at	0.649908	0.0102911
CALML3	0.926957	0.880579	0.975777	0.00377577	1.16309	0.0187678	UP	Paeoniflorin	CALML3|210019_at	-2.26122	0.0197351
JRKL	1.20983	1.03499	1.41421	0.0167678	1.06378	0.00534918	UR	Paeoniflorin	JRKL|206734_at	-0.802458	0.0144985
WWOX	1.25767	1.09301	1.44713	0.00136392	1.17696	0.009425	UR	Paeoniflorin	WWOX|210695_s_at	0.776611	0.00914015
MST1P2	0.891528	0.796883	0.997415	0.0449446	0.69918	0.0239207	UP	Paeoniflorin	MST1P2|213380_x_at	1.20314	0.00223456
CACNA1H	1.11228	1.03596	1.19422	0.0033459	0.722256	0.0129306	UR	Paeoniflorin	CACNA1H|205845_at	1.91487	0.0304618
SERPINA1	0.833568	0.762578	0.911167	6.11255e-05	1.83109	0.0415314	UP	Paeoniflorin	SERPINA1|211428_at	3.65599	0.00310818
APOM	0.841745	0.728689	0.972342	0.0192265	0.968185	0.0210961	UP	Paeoniflorin	APOM|205682_x_at	0.86254	0.0239122
CHMP4A	0.661593	0.516539	0.84738	0.00107012	-0.687267	0.00761658	DP	Paeoniflorin	CHMP4A|218571_s_at	-0.556075	0.00887477
ANXA8	0.9265	0.874299	0.981817	0.009876	2.83724	0.0459999	UP	Paeoniflorin	ANXA8|203074_at	0.789417	0.048898
ERCC1	0.668625	0.495232	0.902727	0.00858632	0.798187	0.036459	UP	Schizandrin	ERCC1|203720_s_at	0.746663	0.0426409
CYBA	0.856253	0.754196	0.972119	0.0165452	3.09865	0.00618658	UP	Schizandrin	CYBA|203028_s_at	0.730715	0.00433496
SYT1	0.935468	0.883442	0.990557	0.0223158	0.702441	0.0227156	UP	Schizandrin	SYT1|203998_s_at	-0.990688	0.0210179
IFI35	0.843555	0.72589	0.980293	0.0264428	0.895068	0.0231157	UP	Schizandrin	IFI35|209417_s_at	0.64596	0.021608
ATP6AP1	1.31326	1.0099	1.70775	0.0420083	-0.603343	0.0143174	DR	Schizandrin	ATP6AP1|207809_s_at	0.711126	0.0198148
TP63	0.895433	0.835731	0.959399	0.00170513	2.45926	0.00352212	UP	Schizandrin	TP63|211834_s_at	-2.49062	0.0305813
HSP90AA1	1.45205	1.16126	1.81567	0.00107115	-0.837049	0.012135	DR	Schizandrin	HSP90AA1|211968_s_at	0.795493	0.0367014
SQLE	1.17109	1.01247	1.35455	0.0334286	-1.23331	0.00275383	DR	Schizandrin	SQLE|213562_s_at	1.69474	0.0149375
TFPI2	0.863383	0.80825	0.922277	1.28211e-05	-2.19854	0.0243707	DP	Schizandrin	TFPI2|209278_s_at	-0.730142	0.00404708
LIFR	0.851201	0.755113	0.959516	0.00838425	-0.619908	0.0155398	DP	Schizandrin	LIFR|205876_at	2.03252	0.0144552
HSPH1	1.29343	1.05363	1.5878	0.0139213	-1.18808	0.00799231	DR	Schizandrin	HSPH1|208744_x_at	0.62817	0.0310523
STAT5A	0.806238	0.674271	0.964033	0.018196	0.731619	0.0243399	UP	Schizandrin	STAT5A|203010_at	2.40708	0.00214648
BST2	0.902419	0.815255	0.998902	0.0475742	1.43158	0.00292765	UP	Schizandrin	BST2|201641_at	-0.653886	0.0434571
REPS1	1.55073	1.16259	2.06846	0.00283656	-0.580046	0.0092244	DR	Schizandrin	REPS1|215201_at	-1.55845	0.0425525
CNPY3	0.743482	0.569517	0.970585	0.0292949	-0.5073	0.0165277	DP	Schizandrin	CNPY3|217931_at	0.754278	0.0020869
CYP1B1	0.884614	0.791722	0.988405	0.0303113	-0.793976	0.0081546	DP	Schizandrin	CYP1B1|202435_s_at	-0.606316	0.012543
CYP1B1	0.884614	0.791722	0.988405	0.0303113	-0.793976	0.0081546	DP	Schizandrin	CYP1B1|202436_s_at	-0.501592	0.0199942
NCOA2	1.15172	1.016	1.30557	0.0272385	-0.617842	0.0139082	DR	Schizandrin	NCOA2|215605_at	-1.13847	0.0126465
RPS11	0.712567	0.558205	0.909614	0.0065188	0.547105	0.0485921	UP	Schizandrin	RPS11|213350_at	-2.09102	0.00156768
NTRK2	0.902823	0.831126	0.980706	0.0154597	1.26225	0.00347418	UP	Schizandrin	NTRK2|207152_at	2.76142	0.0330076
NTRK2	0.902823	0.831126	0.980706	0.0154597	1.26225	0.00347418	UP	Schizandrin	NTRK2|221796_at	-2.9113	0.00486417
PDCD4	0.809773	0.700083	0.93665	0.00449418	0.806707	0.0418405	UP	Schizandrin	PDCD4|202731_at	1.18999	0.0206289
ZFP36L2	0.83299	0.698995	0.99267	0.0411334	1.21225	0.00710625	UP	Schizandrin	ZFP36L2|201367_s_at	3.67981	0.0373288
ZFP36L2	0.83299	0.698995	0.99267	0.0411334	1.21225	0.00710625	UP	Schizandrin	ZFP36L2|201368_at	-0.60781	0.00432423
LSS	1.27938	1.01217	1.61715	0.0392893	-0.801765	0.00818827	DR	Schizandrin	LSS|202245_at	0.519003	0.0137085
LSS	1.27938	1.01217	1.61715	0.0392893	-0.801765	0.00818827	DR	Schizandrin	LSS|211019_s_at	1.15437	0.0113816
UBXN1	0.732303	0.595967	0.899826	0.0030347	0.632671	0.0467226	UP	Schizandrin	UBXN1|210623_at	1.04421	0.00711608
STK17A	0.720604	0.565252	0.918653	0.00817336	-0.517328	0.0315696	DP	Schizandrin	STK17A|202694_at	1.04032	0.0405623
CCT2	1.27593	1.00278	1.62349	0.0474168	-0.530121	0.0395902	DR	Schizandrin	CCT2|201946_s_at	1.26052	0.0028043
ATF5	0.791604	0.628565	0.996931	0.0470238	-0.61731	0.00214719	DP	Schizandrin	ATF5|204999_s_at	0.814889	0.0403721
RASGRP1	0.897784	0.817382	0.986095	0.0242915	1.59482	0.0431577	UP	Schizandrin	RASGRP1|205590_at	-1.75237	0.00193557
TP53I11	1.31094	1.04761	1.64047	0.0179584	0.623038	0.0143908	UR	Schizandrin	TP53I11|216919_at	2.46673	0.0037684
SCUBE2	0.945437	0.898299	0.995048	0.0315401	-1.15654	0.00740076	DP	Schizandrin	SCUBE2|219197_s_at	0.659384	0.00438442
ARL4D	0.862721	0.752914	0.988543	0.0335147	2.86442	0.00170836	UP	Schizandrin	ARL4D|203587_at	-3.19735	0.0458334
NDUFAF3	0.794521	0.631881	0.999023	0.0490307	-0.707824	0.0087317	DP	Schizandrin	NDUFAF3|209177_at	0.661273	0.00408036
EGR3	0.887756	0.813796	0.968438	0.00730609	1.48483	0.0198331	UP	Schizandrin	EGR3|206115_at	0.839515	0.0204449
SIAH2	0.759912	0.646104	0.893767	0.000910778	0.720591	0.0280097	UP	Schizandrin	SIAH2|209339_at	1.08985	0.00501364
JRKL	1.20983	1.03499	1.41421	0.0167678	1.06378	0.00534918	UR	Schizandrin	JRKL|206734_at	-0.731569	0.00501404
ACOT1	0.820265	0.691924	0.972411	0.0224758	-1.3541	0.00443669	DP	Schizandrin	ACOT1|202982_s_at	0.53706	0.0308823
EIF4EBP1	1.16139	1.01819	1.32474	0.0258554	0.783759	0.0129625	UR	Schizandrin	EIF4EBP1|221539_at	0.623133	0.0321674
SERPINA1	0.833568	0.762578	0.911167	6.11255e-05	1.83109	0.0415314	UP	Schizandrin	SERPINA1|202833_s_at	1.40318	0.00190401
SERPINA1	0.833568	0.762578	0.911167	6.11255e-05	1.83109	0.0415314	UP	Schizandrin	SERPINA1|211429_s_at	1.67839	0.00480712
RGL3	0.911448	0.848142	0.97948	0.0115873	3.43248	0.000766773	UP	Schizandrin	RGL3|215054_at	0.858606	0.0455058
MATK	0.879911	0.805265	0.961475	0.00467567	0.632765	0.0277852	UP	Astragaloside IV	MATK|206267_s_at	-0.625089	0.0321966
ERCC1	0.668625	0.495232	0.902727	0.00858632	0.798187	0.036459	UP	Astragaloside IV	ERCC1|203720_s_at	0.768195	0.0231773
PEX3	1.38991	1.0576	1.82663	0.0181907	-0.663254	0.0311167	DR	Astragaloside IV	PEX3|203969_at	-0.649999	0.00803292
TRAF1	0.800699	0.69158	0.927034	0.00294374	1.69095	0.00982732	UP	Astragaloside IV	TRAF1|205599_at	-1.10683	0.0359586
IL17RB	0.869437	0.762472	0.991408	0.0367268	-0.814825	0.0268579	DP	Astragaloside IV	IL17RB|219255_x_at	-0.640942	0.0102545
RPGRIP1	0.844091	0.719107	0.990797	0.038168	-1.21953	0.0109196	DP	Astragaloside IV	RPGRIP1|206608_s_at	0.646421	0.0349442
SQLE	1.17109	1.01247	1.35455	0.0334286	-1.23331	0.00275383	DR	Astragaloside IV	SQLE|213562_s_at	1.05051	0.0444262
TFPI2	0.863383	0.80825	0.922277	1.28211e-05	-2.19854	0.0243707	DP	Astragaloside IV	TFPI2|209278_s_at	0.78035	0.0228423
SLC29A1	1.20735	1.00322	1.45301	0.0461587	-0.735411	0.0272013	DR	Astragaloside IV	SLC29A1|201802_at	0.669534	0.02319
LIFR	0.851201	0.755113	0.959516	0.00838425	-0.619908	0.0155398	DP	Astragaloside IV	LIFR|205876_at	1.74295	0.0293384
SMAD5	1.3837	1.03898	1.84279	0.0263165	0.899666	9.29624e-05	UR	Astragaloside IV	SMAD5|205187_at	0.80729	0.00460545
HSPH1	1.29343	1.05363	1.5878	0.0139213	-1.18808	0.00799231	DR	Astragaloside IV	HSPH1|206976_s_at	-0.550446	0.00627108
NFE2	0.837903	0.760061	0.923719	0.000378044	0.95057	0.0197538	UP	Astragaloside IV	NFE2|209930_s_at	1.79309	0.0278322
STAT5A	0.806238	0.674271	0.964033	0.018196	0.731619	0.0243399	UP	Astragaloside IV	STAT5A|203010_at	1.59765	0.0015228
BST2	0.902419	0.815255	0.998902	0.0475742	1.43158	0.00292765	UP	Astragaloside IV	BST2|201641_at	-1.41512	0.0224296
CCNA1	0.847772	0.765215	0.939235	0.00158196	1.18635	0.019463	UP	Astragaloside IV	CCNA1|205899_at	3.33767	0.00900285
HNRNPA1	0.637302	0.448911	0.904754	0.0117421	0.573658	0.0153167	UP	Astragaloside IV	HNRNPA1|222040_at	1.05243	0.0162179
REPS1	1.55073	1.16259	2.06846	0.00283656	-0.580046	0.0092244	DR	Astragaloside IV	REPS1|215201_at	-1.60065	0.0391682
PMAIP1	0.851132	0.758668	0.954864	0.00601239	1.99112	0.0240982	UP	Astragaloside IV	PMAIP1|204286_s_at	-0.882161	0.0272904
RPS11	0.712567	0.558205	0.909614	0.0065188	0.547105	0.0485921	UP	Astragaloside IV	RPS11|213350_at	-2.25601	0.00183222
PLAC8	0.87431	0.802924	0.952043	0.00199588	-0.927298	0.0425076	DP	Astragaloside IV	PLAC8|219014_at	-0.714194	0.0076317
NTRK2	0.902823	0.831126	0.980706	0.0154597	1.26225	0.00347418	UP	Astragaloside IV	NTRK2|207152_at	2.7276	0.00533457
PAK1	0.778242	0.632695	0.957271	0.0176278	1.44611	0.0053251	UP	Astragaloside IV	PAK1|209615_s_at	0.824573	0.0127287
CABYR	0.821544	0.713662	0.945735	0.00620507	-0.731189	0.0150192	DP	Astragaloside IV	CABYR|219928_s_at	0.587633	0.0112747
LSS	1.27938	1.01217	1.61715	0.0392893	-0.801765	0.00818827	DR	Astragaloside IV	LSS|202245_at	0.637048	0.0110536
CCT2	1.27593	1.00278	1.62349	0.0474168	-0.530121	0.0395902	DR	Astragaloside IV	CCT2|201946_s_at	0.599429	0.0311736
RASGRP1	0.897784	0.817382	0.986095	0.0242915	1.59482	0.0431577	UP	Astragaloside IV	RASGRP1|205590_at	0.647273	0.0115649
FAM131A	0.750821	0.58701	0.960346	0.0224792	-3.86772	0.00427204	DP	Astragaloside IV	FAM131A|221904_at	-0.60539	0.0429893
SCUBE2	0.945437	0.898299	0.995048	0.0315401	-1.15654	0.00740076	DP	Astragaloside IV	SCUBE2|219197_s_at	0.633116	0.0223284
CALML3	0.926957	0.880579	0.975777	0.00377577	1.16309	0.0187678	UP	Astragaloside IV	CALML3|210019_at	-3.17338	0.0157552
EGR3	0.887756	0.813796	0.968438	0.00730609	1.48483	0.0198331	UP	Astragaloside IV	EGR3|206115_at	0.548215	0.0459229
SIAH2	0.759912	0.646104	0.893767	0.000910778	0.720591	0.0280097	UP	Astragaloside IV	SIAH2|209339_at	0.550501	0.0359807
WWOX	1.25767	1.09301	1.44713	0.00136392	1.17696	0.009425	UR	Astragaloside IV	WWOX|210695_s_at	0.635407	0.00995903
WWOX	1.25767	1.09301	1.44713	0.00136392	1.17696	0.009425	UR	Astragaloside IV	WWOX|219077_s_at	0.820977	0.0311996
MST1P2	0.891528	0.796883	0.997415	0.0449446	0.69918	0.0239207	UP	Astragaloside IV	MST1P2|213380_x_at	0.968037	0.00291478
SIRT7	0.742337	0.581829	0.947124	0.0165297	-0.55638	0.0352673	DP	Astragaloside IV	SIRT7|218797_s_at	-0.712778	0.00287652
SERPINA1	0.833568	0.762578	0.911167	6.11255e-05	1.83109	0.0415314	UP	Astragaloside IV	SERPINA1|211428_at	2.24261	0.00813942
SERPINA1	0.833568	0.762578	0.911167	6.11255e-05	1.83109	0.0415314	UP	Astragaloside IV	SERPINA1|211429_s_at	0.940841	0.000999126
RGL3	0.911448	0.848142	0.97948	0.0115873	3.43248	0.000766773	UP	Astragaloside IV	RGL3|215054_at	1.20458	0.0260606
MATK	0.879911	0.805265	0.961475	0.00467567	0.632765	0.0277852	UP	Borneol	MATK|206267_s_at	-0.661072	0.0380054
CYP24A1	0.868571	0.79927	0.943881	0.000895906	4.50911	0.00626847	UP	Borneol	CYP24A1|206504_at	0.680588	0.0465592
PEX3	1.38991	1.0576	1.82663	0.0181907	-0.663254	0.0311167	DR	Borneol	PEX3|203970_s_at	0.61663	0.00772367
SYT1	0.935468	0.883442	0.990557	0.0223158	0.702441	0.0227156	UP	Borneol	SYT1|203998_s_at	0.7034	0.0274458
HSP90AA1	1.45205	1.16126	1.81567	0.00107115	-0.837049	0.012135	DR	Borneol	HSP90AA1|210211_s_at	-0.531902	0.00940348
HSP90AA1	1.45205	1.16126	1.81567	0.00107115	-0.837049	0.012135	DR	Borneol	HSP90AA1|211968_s_at	0.939071	0.0142327
HSP90AA1	1.45205	1.16126	1.81567	0.00107115	-0.837049	0.012135	DR	Borneol	HSP90AA1|214328_s_at	-0.60054	0.000184743
SQLE	1.17109	1.01247	1.35455	0.0334286	-1.23331	0.00275383	DR	Borneol	SQLE|213577_at	0.682605	0.0259477
TFPI2	0.863383	0.80825	0.922277	1.28211e-05	-2.19854	0.0243707	DP	Borneol	TFPI2|209278_s_at	1.19865	0.0229191
B9D1	0.814768	0.681996	0.973389	0.023999	0.871076	0.00170412	UP	Borneol	B9D1|205662_at	0.577117	0.0419026
LIFR	0.851201	0.755113	0.959516	0.00838425	-0.619908	0.0155398	DP	Borneol	LIFR|205876_at	1.7776	0.0374536
SMAD5	1.3837	1.03898	1.84279	0.0263165	0.899666	9.29624e-05	UR	Borneol	SMAD5|205187_at	1.60379	0.0306119
SMAD5	1.3837	1.03898	1.84279	0.0263165	0.899666	9.29624e-05	UR	Borneol	SMAD5|205188_s_at	1.54167	0.00303857
IFT57	0.734906	0.573439	0.941837	0.0149593	0.737613	0.0222441	UP	Borneol	IFT57|218100_s_at	0.611509	0.0482142
NKTR	0.782871	0.613967	0.998241	0.0483634	-0.857731	0.029324	DP	Borneol	NKTR|215338_s_at	0.962825	0.0194698
GBP1	0.870173	0.779125	0.971861	0.0136581	1.76729	0.0118094	UP	Borneol	GBP1|202270_at	3.04292	0.0128855
HSPH1	1.29343	1.05363	1.5878	0.0139213	-1.18808	0.00799231	DR	Borneol	HSPH1|208744_x_at	1.62132	0.00881908
NFE2	0.837903	0.760061	0.923719	0.000378044	0.95057	0.0197538	UP	Borneol	NFE2|209930_s_at	2.559	0.045911
SGCE	0.883745	0.789227	0.989583	0.0322412	1.64272	0.00510119	UP	Borneol	SGCE|204688_at	1.22697	0.00110587
CCNA1	0.847772	0.765215	0.939235	0.00158196	1.18635	0.019463	UP	Borneol	CCNA1|205899_at	2.93715	0.010162
HNRNPA1	0.637302	0.448911	0.904754	0.0117421	0.573658	0.0153167	UP	Borneol	HNRNPA1|222040_at	0.777781	0.0260761
MICAL1	0.798048	0.663271	0.960212	0.0168416	-1.17499	0.000910863	DP	Borneol	MICAL1|218376_s_at	-0.907112	0.0234835
BLK	0.899584	0.831928	0.972741	0.00798361	2.5648	0.000809085	UP	Borneol	BLK|206255_at	-0.869188	0.0254823
BLK	0.899584	0.831928	0.972741	0.00798361	2.5648	0.000809085	UP	Borneol	BLK|210934_at	3.48089	0.0469897
SLC39A8	0.836641	0.721053	0.970758	0.0187137	-1.11532	0.0210013	DP	Borneol	SLC39A8|209267_s_at	1.01958	0.00407742
OSBPL1A	0.759189	0.624002	0.923664	0.00589396	-1.06865	0.00331599	DP	Borneol	OSBPL1A|209485_s_at	-0.502065	0.00678646
PMAIP1	0.851132	0.758668	0.954864	0.00601239	1.99112	0.0240982	UP	Borneol	PMAIP1|204285_s_at	-0.541738	0.0222338
RPS11	0.712567	0.558205	0.909614	0.0065188	0.547105	0.0485921	UP	Borneol	RPS11|213350_at	-0.731952	0.032968
OSBPL10	1.26436	1.02556	1.55877	0.0280704	-0.579902	0.0010835	DR	Borneol	OSBPL10|216755_at	-0.528264	0.0307683
TNFAIP8	0.793556	0.658078	0.956926	0.0154803	1.1739	0.00583217	UP	Borneol	TNFAIP8|208296_x_at	0.861128	0.00911494
NTRK2	0.902823	0.831126	0.980706	0.0154597	1.26225	0.00347418	UP	Borneol	NTRK2|207152_at	3.47898	0.000805779
C11orf49	0.750902	0.58503	0.963803	0.0244836	0.741324	0.00532389	UP	Borneol	C11orf49|203257_s_at	-0.558998	0.0101227
PAK1	0.778242	0.632695	0.957271	0.0176278	1.44611	0.0053251	UP	Borneol	PAK1|209615_s_at	-0.680638	0.0380149
ACSL1	1.14576	1.00279	1.30912	0.0454038	0.692807	0.0392709	UR	Borneol	ACSL1|201963_at	0.780511	0.015717
ATF5	0.791604	0.628565	0.996931	0.0470238	-0.61731	0.00214719	DP	Borneol	ATF5|204999_s_at	0.791376	0.0120159
AZU1	0.9162	0.839788	0.999564	0.048864	0.835229	0.0284523	UP	Borneol	AZU1|214575_s_at	2.55815	0.0200573
RASGRP1	0.897784	0.817382	0.986095	0.0242915	1.59482	0.0431577	UP	Borneol	RASGRP1|205590_at	0.76666	0.00829236
PSMD2	1.45668	1.08228	1.9606	0.0130788	-0.572307	0.0132295	DR	Borneol	PSMD2|200830_at	0.559075	0.0120634
EGR3	0.887756	0.813796	0.968438	0.00730609	1.48483	0.0198331	UP	Borneol	EGR3|206115_at	-1.05876	0.00799302
TNFAIP2	0.849121	0.730359	0.987194	0.0333676	1.92497	0.00253009	UP	Borneol	TNFAIP2|202509_s_at	-2.72536	0.0383692
IFITM1	0.887122	0.790355	0.995736	0.0421059	1.82296	0.00450551	UP	Borneol	IFITM1|201601_x_at	-0.873521	0.00618516
IFITM1	0.887122	0.790355	0.995736	0.0421059	1.82296	0.00450551	UP	Borneol	IFITM1|214022_s_at	-1.37814	0.00275342
WWOX	1.25767	1.09301	1.44713	0.00136392	1.17696	0.009425	UR	Borneol	WWOX|210695_s_at	0.895742	0.0210813
WWOX	1.25767	1.09301	1.44713	0.00136392	1.17696	0.009425	UR	Borneol	WWOX|219077_s_at	1.4327	0.0112573
FAM114A1	1.31171	1.06252	1.61934	0.0115988	0.684411	0.00359831	UR	Borneol	FAM114A1|213455_at	-0.511615	0.0349148
MICB	0.867332	0.760993	0.988531	0.0329394	-2.30236	0.00351529	DP	Borneol	MICB|206247_at	0.692118	0.0477137
ZNF345	0.694723	0.543148	0.888599	0.00372593	0.646037	0.0134328	UP	Borneol	ZNF345|207236_at	1.55664	0.0408653
CHMP4A	0.661593	0.516539	0.84738	0.00107012	-0.687267	0.00761658	DP	Borneol	CHMP4A|218571_s_at	-0.508912	0.00157674
THTPA	0.786704	0.622502	0.994218	0.0445888	-0.500404	0.00768438	DP	Borneol	THTPA|218540_at	-0.647828	0.00755426
RASGRP2	0.90381	0.817214	0.999582	0.0490565	1.74272	0.000176205	UP	Bufotaline	RASGRP2|208206_s_at	-2.46474	0.0103839
FLT3LG	0.818164	0.707507	0.946129	0.00679233	1.28055	0.000502653	UP	Bufotaline	FLT3LG|206980_s_at	-1.54567	0.00360914
LIFR	0.851201	0.755113	0.959516	0.00838425	-0.619908	0.0155398	DP	Bufotaline	LIFR|205876_at	0.94825	0.0181931
SMAD5	1.3837	1.03898	1.84279	0.0263165	0.899666	9.29624e-05	UR	Bufotaline	SMAD5|205188_s_at	0.843699	0.0128074
STAT5A	0.806238	0.674271	0.964033	0.018196	0.731619	0.0243399	UP	Bufotaline	STAT5A|203010_at	1.88077	0.00722758
CCNA1	0.847772	0.765215	0.939235	0.00158196	1.18635	0.019463	UP	Bufotaline	CCNA1|205899_at	2.94179	0.0138438
BLK	0.899584	0.831928	0.972741	0.00798361	2.5648	0.000809085	UP	Bufotaline	BLK|210934_at	3.46953	0.0265024
ESR2	0.773404	0.646698	0.924935	0.00488153	-1.09315	0.0168113	DP	Bufotaline	ESR2|211118_x_at	-1.5817	0.00158976
NPY1R	0.929391	0.885143	0.975851	0.00325952	2.8446	0.032752	UP	Bufotaline	NPY1R|205440_s_at	0.508967	0.00767682
DTX3	0.778381	0.643912	0.94093	0.00962017	0.61891	0.0301964	UP	Bufotaline	DTX3|222022_at	-1.28834	0.0378933
UBA7	0.756256	0.645348	0.886224	0.000554958	0.903451	0.00232153	UP	Bufotaline	UBA7|203281_s_at	1.70861	0.0471589
AASS	0.846134	0.734907	0.974195	0.0201496	0.582156	0.0178771	UP	Cinobufotalin	AASS|210852_s_at	-1.95097	0.0334923
TP63	0.895433	0.835731	0.959399	0.00170513	2.45926	0.00352212	UP	Cinobufotalin	TP63|209863_s_at	-1.62403	0.0368102
GPLD1	0.884538	0.786603	0.994666	0.0404339	0.842386	0.00994592	UP	Cinobufotalin	GPLD1|206265_s_at	-2.14537	0.022593
SLC29A1	1.20735	1.00322	1.45301	0.0461587	-0.735411	0.0272013	DR	Cinobufotalin	SLC29A1|201802_at	0.596627	0.0495882
LIFR	0.851201	0.755113	0.959516	0.00838425	-0.619908	0.0155398	DP	Cinobufotalin	LIFR|205876_at	1.25161	0.0104391
SMAD5	1.3837	1.03898	1.84279	0.0263165	0.899666	9.29624e-05	UR	Cinobufotalin	SMAD5|205188_s_at	1.02768	0.0487921
GBP1	0.870173	0.779125	0.971861	0.0136581	1.76729	0.0118094	UP	Cinobufotalin	GBP1|202270_at	4.09626	0.0142755
STAT5A	0.806238	0.674271	0.964033	0.018196	0.731619	0.0243399	UP	Cinobufotalin	STAT5A|203010_at	2.03147	0.0370463
BLK	0.899584	0.831928	0.972741	0.00798361	2.5648	0.000809085	UP	Cinobufotalin	BLK|210934_at	3.20731	0.0282948
CYP1B1	0.884614	0.791722	0.988405	0.0303113	-0.793976	0.0081546	DP	Cinobufotalin	CYP1B1|202434_s_at	-1.01737	0.0268471
RDH16	1.11024	1.0195	1.20905	0.0162202	-0.87718	0.0361044	DR	Cinobufotalin	RDH16|206753_at	-0.977892	0.0218035
NTRK2	0.902823	0.831126	0.980706	0.0154597	1.26225	0.00347418	UP	Cinobufotalin	NTRK2|207152_at	3.07607	0.0191795
EIF3F	0.685702	0.502515	0.935667	0.0173467	0.50653	0.0236911	UP	Cinobufotalin	EIF3F|200865_at	-2.53074	0.0449199
RGL3	0.911448	0.848142	0.97948	0.0115873	3.43248	0.000766773	UP	Cinobufotalin	RGL3|215054_at	1.03725	0.033117
ERCC1	0.668625	0.495232	0.902727	0.00858632	0.798187	0.036459	UP	Four mixture	ERCC1|203720_s_at	0.781606	0.038264
CYP24A1	0.868571	0.79927	0.943881	0.000895906	4.50911	0.00626847	UP	Four mixture	CYP24A1|206504_at	-2.44471	0.0180421
PEX3	1.38991	1.0576	1.82663	0.0181907	-0.663254	0.0311167	DR	Four mixture	PEX3|203970_s_at	-0.668239	0.00392863
PEX3	1.38991	1.0576	1.82663	0.0181907	-0.663254	0.0311167	DR	Four mixture	PEX3|203972_s_at	-0.677926	0.00188952
ATP6V1H	1.4151	1.10445	1.81312	0.00604006	-0.647518	0.0045928	DR	Four mixture	ATP6V1H|221504_s_at	0.696032	0.00607934
ATP6AP1	1.31326	1.0099	1.70775	0.0420083	-0.603343	0.0143174	DR	Four mixture	ATP6AP1|207809_s_at	0.969634	0.0343713
SDHA	1.39579	1.0287	1.89387	0.0322159	0.56835	0.00579423	UR	Four mixture	SDHA|201093_x_at	-0.516787	0.00961432
AMPH	0.906719	0.831365	0.988902	0.0269614	-4.06597	0.000516736	DP	Four mixture	AMPH|205257_s_at	-0.842625	0.0400502
HSP90AA1	1.45205	1.16126	1.81567	0.00107115	-0.837049	0.012135	DR	Four mixture	HSP90AA1|211968_s_at	1.1575	0.00666735
HSP90AA1	1.45205	1.16126	1.81567	0.00107115	-0.837049	0.012135	DR	Four mixture	HSP90AA1|214328_s_at	-0.537994	0.0294673
SQLE	1.17109	1.01247	1.35455	0.0334286	-1.23331	0.00275383	DR	Four mixture	SQLE|213562_s_at	1.68121	0.0171696
TFPI2	0.863383	0.80825	0.922277	1.28211e-05	-2.19854	0.0243707	DP	Four mixture	TFPI2|209277_at	-2.09988	0.0235101
TFPI2	0.863383	0.80825	0.922277	1.28211e-05	-2.19854	0.0243707	DP	Four mixture	TFPI2|209278_s_at	-1.33074	0.000971912
GPLD1	0.884538	0.786603	0.994666	0.0404339	0.842386	0.00994592	UP	Four mixture	GPLD1|206264_at	-0.519247	0.0459239
GPLD1	0.884538	0.786603	0.994666	0.0404339	0.842386	0.00994592	UP	Four mixture	GPLD1|215554_at	-2.00885	0.00554347
LIFR	0.851201	0.755113	0.959516	0.00838425	-0.619908	0.0155398	DP	Four mixture	LIFR|205876_at	2.53493	0.0177566
SMAD5	1.3837	1.03898	1.84279	0.0263165	0.899666	9.29624e-05	UR	Four mixture	SMAD5|205187_at	1.15715	0.00106056
SMAD5	1.3837	1.03898	1.84279	0.0263165	0.899666	9.29624e-05	UR	Four mixture	SMAD5|205188_s_at	2.00297	0.000665286
STAT5A	0.806238	0.674271	0.964033	0.018196	0.731619	0.0243399	UP	Four mixture	STAT5A|203010_at	2.27725	0.00219285
BST2	0.902419	0.815255	0.998902	0.0475742	1.43158	0.00292765	UP	Four mixture	BST2|201641_at	-1.65685	0.0159642
UBE2G1	1.57464	1.09372	2.26703	0.0146158	0.653258	0.000629595	UR	Four mixture	UBE2G1|209142_s_at	0.551083	0.0281799
CCNA1	0.847772	0.765215	0.939235	0.00158196	1.18635	0.019463	UP	Four mixture	CCNA1|205899_at	2.60658	0.0128825
MKRN1	0.627527	0.413044	0.953386	0.0289867	0.694995	0.00691524	UP	Four mixture	MKRN1|201285_at	0.661141	0.0020875
MKRN1	0.627527	0.413044	0.953386	0.0289867	0.694995	0.00691524	UP	Four mixture	MKRN1|209845_at	1.15442	0.00196252
BTG1	0.729839	0.584047	0.912023	0.00560682	1.13706	0.0217191	UP	Four mixture	BTG1|200920_s_at	0.64827	0.0263829
ZFC3H1	1.39418	1.07737	1.80416	0.0115185	0.542347	0.0107448	UR	Four mixture	ZFC3H1|213065_at	-0.844209	0.0320457
PTPN22	0.887953	0.794392	0.992533	0.036448	-0.765346	0.00689782	DP	Four mixture	PTPN22|208010_s_at	-0.759346	0.0180733
HNRNPA1	0.637302	0.448911	0.904754	0.0117421	0.573658	0.0153167	UP	Four mixture	HNRNPA1|214280_x_at	0.750934	0.0119659
HNRNPA1	0.637302	0.448911	0.904754	0.0117421	0.573658	0.0153167	UP	Four mixture	HNRNPA1|221919_at	1.2869	0.00641457
HNRNPA1	0.637302	0.448911	0.904754	0.0117421	0.573658	0.0153167	UP	Four mixture	HNRNPA1|222040_at	1.46315	0.00936192
BLK	0.899584	0.831928	0.972741	0.00798361	2.5648	0.000809085	UP	Four mixture	BLK|210934_at	3.30071	0.03433
RDX	1.24084	1.0063	1.53003	0.0435123	2.1846	0.00762614	UR	Four mixture	RDX|204969_s_at	-0.718548	0.0100411
RDX	1.24084	1.0063	1.53003	0.0435123	2.1846	0.00762614	UR	Four mixture	RDX|212397_at	-1.30033	0.00134636
CYP1B1	0.884614	0.791722	0.988405	0.0303113	-0.793976	0.0081546	DP	Four mixture	CYP1B1|202434_s_at	3.98557	0.00553264
CYP1B1	0.884614	0.791722	0.988405	0.0303113	-0.793976	0.0081546	DP	Four mixture	CYP1B1|202435_s_at	1.08269	0.00655275
CYP1B1	0.884614	0.791722	0.988405	0.0303113	-0.793976	0.0081546	DP	Four mixture	CYP1B1|202436_s_at	0.949723	0.00281219
CYP1B1	0.884614	0.791722	0.988405	0.0303113	-0.793976	0.0081546	DP	Four mixture	CYP1B1|202437_s_at	0.988823	0.0452309
PMAIP1	0.851132	0.758668	0.954864	0.00601239	1.99112	0.0240982	UP	Four mixture	PMAIP1|204285_s_at	0.677335	0.0070641
PMAIP1	0.851132	0.758668	0.954864	0.00601239	1.99112	0.0240982	UP	Four mixture	PMAIP1|204286_s_at	0.701953	0.007051
RPS11	0.712567	0.558205	0.909614	0.0065188	0.547105	0.0485921	UP	Four mixture	RPS11|213350_at	-2.99028	0.0176315
RFX5	0.742611	0.560088	0.984615	0.038669	0.96646	0.00638029	UP	Four mixture	RFX5|202963_at	-0.75498	0.0314746
PLAC8	0.87431	0.802924	0.952043	0.00199588	-0.927298	0.0425076	DP	Four mixture	PLAC8|219014_at	-1.17844	0.0253881
NFKBIE	0.721325	0.583227	0.892123	0.00258886	-0.64969	0.0105279	DP	Four mixture	NFKBIE|203927_at	0.708133	0.00503449
NTRK2	0.902823	0.831126	0.980706	0.0154597	1.26225	0.00347418	UP	Four mixture	NTRK2|207152_at	3.05672	0.00669293
C11orf49	0.750902	0.58503	0.963803	0.0244836	0.741324	0.00532389	UP	Four mixture	C11orf49|203257_s_at	-0.509872	0.00618641
PDCD4	0.809773	0.700083	0.93665	0.00449418	0.806707	0.0418405	UP	Four mixture	PDCD4|202731_at	0.934393	0.0472825
PDCD4	0.809773	0.700083	0.93665	0.00449418	0.806707	0.0418405	UP	Four mixture	PDCD4|212594_at	-1.19317	0.00587983
ZFP36L2	0.83299	0.698995	0.99267	0.0411334	1.21225	0.00710625	UP	Four mixture	ZFP36L2|201368_at	-1.5715	0.00052186
ZFP36L2	0.83299	0.698995	0.99267	0.0411334	1.21225	0.00710625	UP	Four mixture	ZFP36L2|201369_s_at	-1.08242	0.0324929
CABYR	0.821544	0.713662	0.945735	0.00620507	-0.731189	0.0150192	DP	Four mixture	CABYR|219928_s_at	0.726554	0.0446783
TMPRSS3	0.94109	0.887447	0.997975	0.0425951	0.869182	0.00604686	UP	Four mixture	TMPRSS3|220177_s_at	-0.625457	0.0242403
LSS	1.27938	1.01217	1.61715	0.0392893	-0.801765	0.00818827	DR	Four mixture	LSS|202245_at	-1.01664	0.00446257
UBXN1	0.732303	0.595967	0.899826	0.0030347	0.632671	0.0467226	UP	Four mixture	UBXN1|201871_s_at	0.542995	0.0435938
UBXN1	0.732303	0.595967	0.899826	0.0030347	0.632671	0.0467226	UP	Four mixture	UBXN1|210623_at	1.58824	0.00515597
NPY1R	0.929391	0.885143	0.975851	0.00325952	2.8446	0.032752	UP	Four mixture	NPY1R|205440_s_at	-1.86471	0.000413658
STK17A	0.720604	0.565252	0.918653	0.00817336	-0.517328	0.0315696	DP	Four mixture	STK17A|202693_s_at	1.24946	0.00777332
RPS14	0.780611	0.616312	0.988708	0.0399616	0.910178	0.0284209	UP	Four mixture	RPS14|214245_at	1.38666	0.000508098
CCT2	1.27593	1.00278	1.62349	0.0474168	-0.530121	0.0395902	DR	Four mixture	CCT2|201946_s_at	1.26538	0.0044264
FAM111A	0.700654	0.558797	0.878522	0.00205594	-0.887873	0.0020523	DP	Four mixture	FAM111A|218248_at	-0.650487	0.0494167
GNG4	0.90509	0.84173	0.973219	0.00708	2.79913	0.0395606	UP	Four mixture	GNG4|205184_at	-0.955579	0.0424565
TLN2	0.833613	0.695783	0.998745	0.0484298	-0.927363	0.00221108	DP	Four mixture	TLN2|212703_at	-1.31464	0.0456785
RASGRP1	0.897784	0.817382	0.986095	0.0242915	1.59482	0.0431577	UP	Four mixture	RASGRP1|205590_at	-2.96025	0.0223317
MYD88	0.66317	0.478391	0.919319	0.0137094	-0.638584	0.00281059	DP	Four mixture	MYD88|209124_at	-0.823488	0.00234251
PSMD1	1.57189	1.08944	2.26799	0.015608	-0.720859	0.0182201	DR	Four mixture	PSMD1|201199_s_at	-0.517295	0.0184928
TP53I11	1.31094	1.04761	1.64047	0.0179584	0.623038	0.0143908	UR	Four mixture	TP53I11|216919_at	1.75264	0.00728318
EGR3	0.887756	0.813796	0.968438	0.00730609	1.48483	0.0198331	UP	Four mixture	EGR3|206115_at	-2.34442	0.00200973
SGSH	0.692637	0.513894	0.93355	0.0158886	-0.638242	0.00192707	DP	Four mixture	SGSH|35626_at	-0.693845	0.018172
SIAH2	0.759912	0.646104	0.893767	0.000910778	0.720591	0.0280097	UP	Four mixture	SIAH2|209339_at	1.87279	0.00116344
TNFAIP2	0.849121	0.730359	0.987194	0.0333676	1.92497	0.00253009	UP	Four mixture	TNFAIP2|202510_s_at	-0.927806	0.0417106
IFITM1	0.887122	0.790355	0.995736	0.0421059	1.82296	0.00450551	UP	Four mixture	IFITM1|214022_s_at	-0.955737	0.0306391
EIF4EBP1	1.16139	1.01819	1.32474	0.0258554	0.783759	0.0129625	UR	Four mixture	EIF4EBP1|221539_at	1.45638	0.0070487
SERPINA1	0.833568	0.762578	0.911167	6.11255e-05	1.83109	0.0415314	UP	Four mixture	SERPINA1|202833_s_at	0.954945	0.00530365
SERPINA1	0.833568	0.762578	0.911167	6.11255e-05	1.83109	0.0415314	UP	Four mixture	SERPINA1|211429_s_at	1.74364	0.000331897
FAM114A1	1.31171	1.06252	1.61934	0.0115988	0.684411	0.00359831	UR	Four mixture	FAM114A1|213455_at	-1.0177	0.0140849
MICB	0.867332	0.760993	0.988531	0.0329394	-2.30236	0.00351529	DP	Four mixture	MICB|205905_s_at	0.575871	0.0273363
ERCC1	0.668625	0.495232	0.902727	0.00858632	0.798187	0.036459	UP	Gentiopicroside	ERCC1|203720_s_at	0.682057	0.0494265
RFXANK	0.757901	0.596604	0.962805	0.023182	0.673415	0.00288057	UP	Gentiopicroside	RFXANK|202758_s_at	0.504691	0.0206571
SYT1	0.935468	0.883442	0.990557	0.0223158	0.702441	0.0227156	UP	Gentiopicroside	SYT1|203998_s_at	-0.638511	0.0255371
ATP6AP1	1.31326	1.0099	1.70775	0.0420083	-0.603343	0.0143174	DR	Gentiopicroside	ATP6AP1|207809_s_at	0.694954	0.0211673
TP63	0.895433	0.835731	0.959399	0.00170513	2.45926	0.00352212	UP	Gentiopicroside	TP63|211834_s_at	-2.7433	0.0296695
HSP90AA1	1.45205	1.16126	1.81567	0.00107115	-0.837049	0.012135	DR	Gentiopicroside	HSP90AA1|210211_s_at	-0.54492	0.00291224
HSP90AA1	1.45205	1.16126	1.81567	0.00107115	-0.837049	0.012135	DR	Gentiopicroside	HSP90AA1|211968_s_at	0.900468	0.0109279
HSP90AA1	1.45205	1.16126	1.81567	0.00107115	-0.837049	0.012135	DR	Gentiopicroside	HSP90AA1|211969_at	-0.555407	0.00489957
HSP90AA1	1.45205	1.16126	1.81567	0.00107115	-0.837049	0.012135	DR	Gentiopicroside	HSP90AA1|214328_s_at	-0.719502	0.000773861
SQLE	1.17109	1.01247	1.35455	0.0334286	-1.23331	0.00275383	DR	Gentiopicroside	SQLE|213562_s_at	1.54126	0.0185564
CADM4	0.827547	0.714254	0.95881	0.0117384	1.13849	0.00103286	UP	Gentiopicroside	CADM4|214267_s_at	-4.1178	0.0280185
TFPI2	0.863383	0.80825	0.922277	1.28211e-05	-2.19854	0.0243707	DP	Gentiopicroside	TFPI2|209278_s_at	-0.865782	0.0347731
GPLD1	0.884538	0.786603	0.994666	0.0404339	0.842386	0.00994592	UP	Gentiopicroside	GPLD1|206264_at	-1.68842	0.0280399
LIFR	0.851201	0.755113	0.959516	0.00838425	-0.619908	0.0155398	DP	Gentiopicroside	LIFR|205876_at	1.47969	0.0365682
RPL24	0.761286	0.593477	0.976545	0.031811	0.884703	0.0167652	UP	Gentiopicroside	RPL24|200013_at	-0.528434	0.00309109
GBP1	0.870173	0.779125	0.971861	0.0136581	1.76729	0.0118094	UP	Gentiopicroside	GBP1|202270_at	2.84997	0.0143657
RPL5	0.677671	0.529342	0.867563	0.00202079	0.595441	0.0299195	UP	Gentiopicroside	RPL5|210034_s_at	-0.860732	0.00514626
NFE2	0.837903	0.760061	0.923719	0.000378044	0.95057	0.0197538	UP	Gentiopicroside	NFE2|209930_s_at	3.45163	0.0303355
STAT5A	0.806238	0.674271	0.964033	0.018196	0.731619	0.0243399	UP	Gentiopicroside	STAT5A|203010_at	1.72615	0.00717222
BST2	0.902419	0.815255	0.998902	0.0475742	1.43158	0.00292765	UP	Gentiopicroside	BST2|201641_at	-1.00929	0.0150092
PTPN22	0.887953	0.794392	0.992533	0.036448	-0.765346	0.00689782	DP	Gentiopicroside	PTPN22|208010_s_at	-1.5102	0.00556613
CCNJL	0.886932	0.792788	0.992256	0.0361041	2.20658	8.20633e-05	UP	Gentiopicroside	CCNJL|219227_at	-0.901117	0.00716474
HNRNPA1	0.637302	0.448911	0.904754	0.0117421	0.573658	0.0153167	UP	Gentiopicroside	HNRNPA1|200016_x_at	-0.531456	0.00635795
HNRNPA1	0.637302	0.448911	0.904754	0.0117421	0.573658	0.0153167	UP	Gentiopicroside	HNRNPA1|213356_x_at	-0.52689	0.0187328
HNRNPA1	0.637302	0.448911	0.904754	0.0117421	0.573658	0.0153167	UP	Gentiopicroside	HNRNPA1|222040_at	0.616944	0.0406617
BLK	0.899584	0.831928	0.972741	0.00798361	2.5648	0.000809085	UP	Gentiopicroside	BLK|210934_at	3.26507	0.0266615
CYP1B1	0.884614	0.791722	0.988405	0.0303113	-0.793976	0.0081546	DP	Gentiopicroside	CYP1B1|202435_s_at	-0.671056	0.0133121
CYP1B1	0.884614	0.791722	0.988405	0.0303113	-0.793976	0.0081546	DP	Gentiopicroside	CYP1B1|202436_s_at	-0.684445	0.00192742
OSBPL10	1.26436	1.02556	1.55877	0.0280704	-0.579902	0.0010835	DR	Gentiopicroside	OSBPL10|216755_at	-0.91676	0.0422816
NTRK2	0.902823	0.831126	0.980706	0.0154597	1.26225	0.00347418	UP	Gentiopicroside	NTRK2|207152_at	3.07406	0.0040492
PDCD4	0.809773	0.700083	0.93665	0.00449418	0.806707	0.0418405	UP	Gentiopicroside	PDCD4|202731_at	1.25565	0.0201924
ZFP36L2	0.83299	0.698995	0.99267	0.0411334	1.21225	0.00710625	UP	Gentiopicroside	ZFP36L2|201368_at	-0.680911	0.00301369
RPS14	0.780611	0.616312	0.988708	0.0399616	0.910178	0.0284209	UP	Gentiopicroside	RPS14|208645_s_at	-0.571817	0.0064079
CCT2	1.27593	1.00278	1.62349	0.0474168	-0.530121	0.0395902	DR	Gentiopicroside	CCT2|201946_s_at	1.29668	7.2532e-05
RASGRP1	0.897784	0.817382	0.986095	0.0242915	1.59482	0.0431577	UP	Gentiopicroside	RASGRP1|205590_at	-1.61609	0.00352706
TP53I11	1.31094	1.04761	1.64047	0.0179584	0.623038	0.0143908	UR	Gentiopicroside	TP53I11|216919_at	1.77217	0.00279527
SCUBE2	0.945437	0.898299	0.995048	0.0315401	-1.15654	0.00740076	DP	Gentiopicroside	SCUBE2|219197_s_at	0.687932	0.00398584
DTX3	0.778381	0.643912	0.94093	0.00962017	0.61891	0.0301964	UP	Gentiopicroside	DTX3|49051_g_at	-3.28019	0.00224241
EGR3	0.887756	0.813796	0.968438	0.00730609	1.48483	0.0198331	UP	Gentiopicroside	EGR3|206115_at	0.865624	0.0187549
SIAH2	0.759912	0.646104	0.893767	0.000910778	0.720591	0.0280097	UP	Gentiopicroside	SIAH2|209339_at	1.0811	0.0347241
TNFAIP2	0.849121	0.730359	0.987194	0.0333676	1.92497	0.00253009	UP	Gentiopicroside	TNFAIP2|202510_s_at	-1.15161	0.0277628
IFITM1	0.887122	0.790355	0.995736	0.0421059	1.82296	0.00450551	UP	Gentiopicroside	IFITM1|214022_s_at	-0.52658	0.00662331
SERPINA1	0.833568	0.762578	0.911167	6.11255e-05	1.83109	0.0415314	UP	Gentiopicroside	SERPINA1|202833_s_at	0.827549	0.00108014
SERPINA1	0.833568	0.762578	0.911167	6.11255e-05	1.83109	0.0415314	UP	Gentiopicroside	SERPINA1|211429_s_at	1.74714	0.000908859
AASS	0.846134	0.734907	0.974195	0.0201496	0.582156	0.0178771	UP	Andrographolide	AASS|210852_s_at	-2.58589	0.0121515
ERCC1	0.668625	0.495232	0.902727	0.00858632	0.798187	0.036459	UP	Andrographolide	ERCC1|203720_s_at	0.684894	0.00743592
SYT1	0.935468	0.883442	0.990557	0.0223158	0.702441	0.0227156	UP	Andrographolide	SYT1|203998_s_at	1.06595	0.0117361
HSP90AA1	1.45205	1.16126	1.81567	0.00107115	-0.837049	0.012135	DR	Andrographolide	HSP90AA1|211968_s_at	0.926421	0.0115122
HSP90AA1	1.45205	1.16126	1.81567	0.00107115	-0.837049	0.012135	DR	Andrographolide	HSP90AA1|214328_s_at	-0.575117	0.000117645
RPGRIP1	0.844091	0.719107	0.990797	0.038168	-1.21953	0.0109196	DP	Andrographolide	RPGRIP1|206608_s_at	1.20979	0.0211582
ATG4A	1.7216	1.24298	2.38452	0.00108041	-0.659957	0.0306252	DR	Andrographolide	ATG4A|213115_at	-0.767316	0.00968883
SQLE	1.17109	1.01247	1.35455	0.0334286	-1.23331	0.00275383	DR	Andrographolide	SQLE|213577_at	0.746392	0.012082
B9D1	0.814768	0.681996	0.973389	0.023999	0.871076	0.00170412	UP	Andrographolide	B9D1|205662_at	0.782516	0.0188737
B9D1	0.814768	0.681996	0.973389	0.023999	0.871076	0.00170412	UP	Andrographolide	B9D1|210534_s_at	0.900067	0.00235229
B9D1	0.814768	0.681996	0.973389	0.023999	0.871076	0.00170412	UP	Andrographolide	B9D1|210535_at	0.572127	0.0267111
GPLD1	0.884538	0.786603	0.994666	0.0404339	0.842386	0.00994592	UP	Andrographolide	GPLD1|206264_at	0.782492	0.0308685
LIFR	0.851201	0.755113	0.959516	0.00838425	-0.619908	0.0155398	DP	Andrographolide	LIFR|205876_at	1.54363	0.0346049
SMAD5	1.3837	1.03898	1.84279	0.0263165	0.899666	9.29624e-05	UR	Andrographolide	SMAD5|205187_at	1.51286	0.0345709
SMAD5	1.3837	1.03898	1.84279	0.0263165	0.899666	9.29624e-05	UR	Andrographolide	SMAD5|205188_s_at	1.63396	0.00340441
NKTR	0.782871	0.613967	0.998241	0.0483634	-0.857731	0.029324	DP	Andrographolide	NKTR|215338_s_at	0.730946	0.0121146
HSPH1	1.29343	1.05363	1.5878	0.0139213	-1.18808	0.00799231	DR	Andrographolide	HSPH1|208744_x_at	1.74045	0.00467308
RPL5	0.677671	0.529342	0.867563	0.00202079	0.595441	0.0299195	UP	Andrographolide	RPL5|210034_s_at	-0.672878	0.0378366
CDKN1C	0.85026	0.741928	0.974409	0.0196601	2.51059	0.00922802	UP	Andrographolide	CDKN1C|216894_x_at	-3.35319	0.00824553
CCNA1	0.847772	0.765215	0.939235	0.00158196	1.18635	0.019463	UP	Andrographolide	CCNA1|205899_at	3.08485	0.0292655
MKRN1	0.627527	0.413044	0.953386	0.0289867	0.694995	0.00691524	UP	Andrographolide	MKRN1|209845_at	-0.538037	0.00740088
PTPN22	0.887953	0.794392	0.992533	0.036448	-0.765346	0.00689782	DP	Andrographolide	PTPN22|208010_s_at	-0.621446	0.00832871
CCNJL	0.886932	0.792788	0.992256	0.0361041	2.20658	8.20633e-05	UP	Andrographolide	CCNJL|219227_at	0.600951	0.0200472
HNRNPA1	0.637302	0.448911	0.904754	0.0117421	0.573658	0.0153167	UP	Andrographolide	HNRNPA1|222040_at	0.919035	0.0323368
RDX	1.24084	1.0063	1.53003	0.0435123	2.1846	0.00762614	UR	Andrographolide	RDX|204969_s_at	0.707826	0.0215949
RDX	1.24084	1.0063	1.53003	0.0435123	2.1846	0.00762614	UR	Andrographolide	RDX|212398_at	0.927597	0.0193211
RDH16	1.11024	1.0195	1.20905	0.0162202	-0.87718	0.0361044	DR	Andrographolide	RDH16|206753_at	-1.83404	0.00555888
RPS11	0.712567	0.558205	0.909614	0.0065188	0.547105	0.0485921	UP	Andrographolide	RPS11|213350_at	-2.71299	0.00288589
NTRK2	0.902823	0.831126	0.980706	0.0154597	1.26225	0.00347418	UP	Andrographolide	NTRK2|207152_at	3.43461	0.00474999
C11orf49	0.750902	0.58503	0.963803	0.0244836	0.741324	0.00532389	UP	Andrographolide	C11orf49|203257_s_at	-0.731159	0.00405653
CABYR	0.821544	0.713662	0.945735	0.00620507	-0.731189	0.0150192	DP	Andrographolide	CABYR|219928_s_at	1.60532	0.000850289
TMPRSS3	0.94109	0.887447	0.997975	0.0425951	0.869182	0.00604686	UP	Andrographolide	TMPRSS3|220177_s_at	0.694725	0.00347617
GBP2	0.786174	0.681481	0.90695	0.000968757	-1.58394	0.00506479	DP	Andrographolide	GBP2|202748_at	-0.56333	0.0429859
CCT2	1.27593	1.00278	1.62349	0.0474168	-0.530121	0.0395902	DR	Andrographolide	CCT2|201946_s_at	1.01598	0.00575482
KLK7	0.947965	0.899012	0.999582	0.0482223	4.69496	0.00833379	UP	Andrographolide	KLK7|205778_at	-2.01152	0.0268455
ATF5	0.791604	0.628565	0.996931	0.0470238	-0.61731	0.00214719	DP	Andrographolide	ATF5|204999_s_at	1.2883	0.00922117
TLN2	0.833613	0.695783	0.998745	0.0484298	-0.927363	0.00221108	DP	Andrographolide	TLN2|212703_at	-1.07009	0.047434
PSMD1	1.57189	1.08944	2.26799	0.015608	-0.720859	0.0182201	DR	Andrographolide	PSMD1|201198_s_at	0.764216	0.0207147
PSMD2	1.45668	1.08228	1.9606	0.0130788	-0.572307	0.0132295	DR	Andrographolide	PSMD2|200830_at	0.57145	0.0211333
DTX3	0.778381	0.643912	0.94093	0.00962017	0.61891	0.0301964	UP	Andrographolide	DTX3|49051_g_at	-2.13015	0.045736
EGR3	0.887756	0.813796	0.968438	0.00730609	1.48483	0.0198331	UP	Andrographolide	EGR3|206115_at	0.667331	0.038195
SIAH2	0.759912	0.646104	0.893767	0.000910778	0.720591	0.0280097	UP	Andrographolide	SIAH2|209339_at	0.710138	0.0271195
JRKL	1.20983	1.03499	1.41421	0.0167678	1.06378	0.00534918	UR	Andrographolide	JRKL|206734_at	-0.719169	0.0278351
TNFAIP2	0.849121	0.730359	0.987194	0.0333676	1.92497	0.00253009	UP	Andrographolide	TNFAIP2|202510_s_at	-0.894548	0.042788
IFITM1	0.887122	0.790355	0.995736	0.0421059	1.82296	0.00450551	UP	Andrographolide	IFITM1|214022_s_at	-0.508208	0.00251499
WWOX	1.25767	1.09301	1.44713	0.00136392	1.17696	0.009425	UR	Andrographolide	WWOX|210695_s_at	0.526247	0.0122241
MST1P2	0.891528	0.796883	0.997415	0.0449446	0.69918	0.0239207	UP	Andrographolide	MST1P2|213380_x_at	0.830036	0.0111997
SERPINA1	0.833568	0.762578	0.911167	6.11255e-05	1.83109	0.0415314	UP	Andrographolide	SERPINA1|211428_at	3.87021	0.00666311
APOM	0.841745	0.728689	0.972342	0.0192265	0.968185	0.0210961	UP	Andrographolide	APOM|205682_x_at	0.808417	0.0222609
CHMP4A	0.661593	0.516539	0.84738	0.00107012	-0.687267	0.00761658	DP	Andrographolide	CHMP4A|218571_s_at	-0.598171	0.0287025
ERCC1	0.668625	0.495232	0.902727	0.00858632	0.798187	0.036459	UP	Sanguinarine	ERCC1|203720_s_at	0.892461	0.0231746
PEX3	1.38991	1.0576	1.82663	0.0181907	-0.663254	0.0311167	DR	Sanguinarine	PEX3|203969_at	-0.711456	0.0113735
RFXANK	0.757901	0.596604	0.962805	0.023182	0.673415	0.00288057	UP	Sanguinarine	RFXANK|202758_s_at	0.572003	0.0367209
ATP6AP1	1.31326	1.0099	1.70775	0.0420083	-0.603343	0.0143174	DR	Sanguinarine	ATP6AP1|207809_s_at	0.523351	0.00963125
TP63	0.895433	0.835731	0.959399	0.00170513	2.45926	0.00352212	UP	Sanguinarine	TP63|209863_s_at	-0.949436	0.0248883
HSP90AA1	1.45205	1.16126	1.81567	0.00107115	-0.837049	0.012135	DR	Sanguinarine	HSP90AA1|210211_s_at	-0.589069	0.00719385
HSP90AA1	1.45205	1.16126	1.81567	0.00107115	-0.837049	0.012135	DR	Sanguinarine	HSP90AA1|211968_s_at	0.986886	0.00731785
HSP90AA1	1.45205	1.16126	1.81567	0.00107115	-0.837049	0.012135	DR	Sanguinarine	HSP90AA1|211969_at	-0.560647	0.000584742
HSP90AA1	1.45205	1.16126	1.81567	0.00107115	-0.837049	0.012135	DR	Sanguinarine	HSP90AA1|214328_s_at	-0.80349	0.00438666
TESC	0.871084	0.782908	0.969192	0.0112558	1.37269	0.0181298	UP	Sanguinarine	TESC|218872_at	0.796536	0.0161087
SQLE	1.17109	1.01247	1.35455	0.0334286	-1.23331	0.00275383	DR	Sanguinarine	SQLE|213562_s_at	1.78048	0.0166545
TFPI2	0.863383	0.80825	0.922277	1.28211e-05	-2.19854	0.0243707	DP	Sanguinarine	TFPI2|209278_s_at	-0.893448	0.019276
GPLD1	0.884538	0.786603	0.994666	0.0404339	0.842386	0.00994592	UP	Sanguinarine	GPLD1|215554_at	-0.985768	0.0335528
SMAD5	1.3837	1.03898	1.84279	0.0263165	0.899666	9.29624e-05	UR	Sanguinarine	SMAD5|205188_s_at	0.673716	0.00954208
RPL24	0.761286	0.593477	0.976545	0.031811	0.884703	0.0167652	UP	Sanguinarine	RPL24|200013_at	-0.592836	0.00141457
RPL24	0.761286	0.593477	0.976545	0.031811	0.884703	0.0167652	UP	Sanguinarine	RPL24|214143_x_at	-0.507822	0.0106239
IFT57	0.734906	0.573439	0.941837	0.0149593	0.737613	0.0222441	UP	Sanguinarine	IFT57|218100_s_at	-0.555507	0.000850875
GBP1	0.870173	0.779125	0.971861	0.0136581	1.76729	0.0118094	UP	Sanguinarine	GBP1|202270_at	1.80276	0.0326118
HSPH1	1.29343	1.05363	1.5878	0.0139213	-1.18808	0.00799231	DR	Sanguinarine	HSPH1|208744_x_at	1.25788	0.00916357
RPL5	0.677671	0.529342	0.867563	0.00202079	0.595441	0.0299195	UP	Sanguinarine	RPL5|210034_s_at	-0.777218	0.0236188
RPL5	0.677671	0.529342	0.867563	0.00202079	0.595441	0.0299195	UP	Sanguinarine	RPL5|213080_x_at	-0.510556	0.000515022
NFE2	0.837903	0.760061	0.923719	0.000378044	0.95057	0.0197538	UP	Sanguinarine	NFE2|209930_s_at	3.19911	0.00435007
STAT5A	0.806238	0.674271	0.964033	0.018196	0.731619	0.0243399	UP	Sanguinarine	STAT5A|203010_at	1.62455	0.00446171
BST2	0.902419	0.815255	0.998902	0.0475742	1.43158	0.00292765	UP	Sanguinarine	BST2|201641_at	-0.963023	0.0116909
HNRNPA1	0.637302	0.448911	0.904754	0.0117421	0.573658	0.0153167	UP	Sanguinarine	HNRNPA1|200016_x_at	-0.567402	0.00732866
HNRNPA1	0.637302	0.448911	0.904754	0.0117421	0.573658	0.0153167	UP	Sanguinarine	HNRNPA1|213356_x_at	-0.562026	0.019011
BLK	0.899584	0.831928	0.972741	0.00798361	2.5648	0.000809085	UP	Sanguinarine	BLK|210934_at	3.40312	0.025825
CNPY3	0.743482	0.569517	0.970585	0.0292949	-0.5073	0.0165277	DP	Sanguinarine	CNPY3|217931_at	1.06251	0.00621116
RDX	1.24084	1.0063	1.53003	0.0435123	2.1846	0.00762614	UR	Sanguinarine	RDX|212397_at	-0.702434	0.00373632
CYP1B1	0.884614	0.791722	0.988405	0.0303113	-0.793976	0.0081546	DP	Sanguinarine	CYP1B1|202434_s_at	3.76666	0.0100429
CYP1B1	0.884614	0.791722	0.988405	0.0303113	-0.793976	0.0081546	DP	Sanguinarine	CYP1B1|202435_s_at	0.68162	0.00807809
CYP1B1	0.884614	0.791722	0.988405	0.0303113	-0.793976	0.0081546	DP	Sanguinarine	CYP1B1|202436_s_at	0.624562	0.00391321
RPS11	0.712567	0.558205	0.909614	0.0065188	0.547105	0.0485921	UP	Sanguinarine	RPS11|213350_at	-2.94485	0.00540292
OSBPL10	1.26436	1.02556	1.55877	0.0280704	-0.579902	0.0010835	DR	Sanguinarine	OSBPL10|216755_at	-1.0538	0.00832281
NTRK2	0.902823	0.831126	0.980706	0.0154597	1.26225	0.00347418	UP	Sanguinarine	NTRK2|207152_at	2.71096	0.00595907
PDCD4	0.809773	0.700083	0.93665	0.00449418	0.806707	0.0418405	UP	Sanguinarine	PDCD4|202731_at	1.28722	0.0176866
ZFP36L2	0.83299	0.698995	0.99267	0.0411334	1.21225	0.00710625	UP	Sanguinarine	ZFP36L2|201367_s_at	3.24291	0.0490528
ZFP36L2	0.83299	0.698995	0.99267	0.0411334	1.21225	0.00710625	UP	Sanguinarine	ZFP36L2|201368_at	-0.688179	0.00801043
NPY1R	0.929391	0.885143	0.975851	0.00325952	2.8446	0.032752	UP	Sanguinarine	NPY1R|205440_s_at	-0.87451	0.000211761
STK17A	0.720604	0.565252	0.918653	0.00817336	-0.517328	0.0315696	DP	Sanguinarine	STK17A|202694_at	0.956451	0.0244794
RPS14	0.780611	0.616312	0.988708	0.0399616	0.910178	0.0284209	UP	Sanguinarine	RPS14|208645_s_at	-0.658523	0.00686499
CCT2	1.27593	1.00278	1.62349	0.0474168	-0.530121	0.0395902	DR	Sanguinarine	CCT2|201946_s_at	1.55649	0.000497839
AZU1	0.9162	0.839788	0.999564	0.048864	0.835229	0.0284523	UP	Sanguinarine	AZU1|214575_s_at	3.1942	0.0281548
RASGRP1	0.897784	0.817382	0.986095	0.0242915	1.59482	0.0431577	UP	Sanguinarine	RASGRP1|205590_at	-1.72962	0.00318157
SCUBE2	0.945437	0.898299	0.995048	0.0315401	-1.15654	0.00740076	DP	Sanguinarine	SCUBE2|219197_s_at	0.903598	0.00158243
NDUFAF3	0.794521	0.631881	0.999023	0.0490307	-0.707824	0.0087317	DP	Sanguinarine	NDUFAF3|209177_at	0.609482	0.0301278
DTX3	0.778381	0.643912	0.94093	0.00962017	0.61891	0.0301964	UP	Sanguinarine	DTX3|49051_g_at	-3.28402	0.00712527
EGR3	0.887756	0.813796	0.968438	0.00730609	1.48483	0.0198331	UP	Sanguinarine	EGR3|206115_at	0.815208	0.024157
SIAH2	0.759912	0.646104	0.893767	0.000910778	0.720591	0.0280097	UP	Sanguinarine	SIAH2|209339_at	1.26185	0.0101327
JRKL	1.20983	1.03499	1.41421	0.0167678	1.06378	0.00534918	UR	Sanguinarine	JRKL|206734_at	-0.560378	0.0159159
IFITM1	0.887122	0.790355	0.995736	0.0421059	1.82296	0.00450551	UP	Sanguinarine	IFITM1|214022_s_at	-0.651075	0.00705585
ZNF75D	1.46618	1.08796	1.97589	0.0119444	0.568738	0.0131017	UR	Sanguinarine	ZNF75D|214813_at	0.652905	0.044524
EIF4EBP1	1.16139	1.01819	1.32474	0.0258554	0.783759	0.0129625	UR	Sanguinarine	EIF4EBP1|221539_at	0.675598	0.028308
CACNA1H	1.11228	1.03596	1.19422	0.0033459	0.722256	0.0129306	UR	Sanguinarine	CACNA1H|205845_at	1.70491	0.0069446
SERPINA1	0.833568	0.762578	0.911167	6.11255e-05	1.83109	0.0415314	UP	Sanguinarine	SERPINA1|202833_s_at	1.28342	0.00423189
SERPINA1	0.833568	0.762578	0.911167	6.11255e-05	1.83109	0.0415314	UP	Sanguinarine	SERPINA1|211429_s_at	1.80717	0.000806197
FAM114A1	1.31171	1.06252	1.61934	0.0115988	0.684411	0.00359831	UR	Sanguinarine	FAM114A1|213455_at	-0.61151	0.0372045
LY6G5C	0.83682	0.705237	0.992954	0.041253	-0.882802	0.0172129	DP	Sanguinarine	LY6G5C|219860_at	0.72961	0.0425382
MICB	0.867332	0.760993	0.988531	0.0329394	-2.30236	0.00351529	DP	Sanguinarine	MICB|206247_at	0.834047	0.0287082
ERCC1	0.668625	0.495232	0.902727	0.00858632	0.798187	0.036459	UP	Hesperidin	ERCC1|203720_s_at	0.763706	0.0411042
TRAF1	0.800699	0.69158	0.927034	0.00294374	1.69095	0.00982732	UP	Hesperidin	TRAF1|205599_at	-0.776244	0.0496796
IL17RB	0.869437	0.762472	0.991408	0.0367268	-0.814825	0.0268579	DP	Hesperidin	IL17RB|219255_x_at	-0.656515	0.0205461
SYT1	0.935468	0.883442	0.990557	0.0223158	0.702441	0.0227156	UP	Hesperidin	SYT1|203998_s_at	0.80105	0.0361224
HSP90AA1	1.45205	1.16126	1.81567	0.00107115	-0.837049	0.012135	DR	Hesperidin	HSP90AA1|210211_s_at	-0.612236	0.0231048
HSP90AA1	1.45205	1.16126	1.81567	0.00107115	-0.837049	0.012135	DR	Hesperidin	HSP90AA1|214328_s_at	-0.644472	0.0144306
ATG4A	1.7216	1.24298	2.38452	0.00108041	-0.659957	0.0306252	DR	Hesperidin	ATG4A|213115_at	-0.528513	0.0332356
SQLE	1.17109	1.01247	1.35455	0.0334286	-1.23331	0.00275383	DR	Hesperidin	SQLE|213562_s_at	1.12418	0.0359407
SQLE	1.17109	1.01247	1.35455	0.0334286	-1.23331	0.00275383	DR	Hesperidin	SQLE|213577_at	0.733716	0.00850093
TFPI2	0.863383	0.80825	0.922277	1.28211e-05	-2.19854	0.0243707	DP	Hesperidin	TFPI2|209278_s_at	0.693076	0.0267
B9D1	0.814768	0.681996	0.973389	0.023999	0.871076	0.00170412	UP	Hesperidin	B9D1|205662_at	0.72766	0.0287801
B9D1	0.814768	0.681996	0.973389	0.023999	0.871076	0.00170412	UP	Hesperidin	B9D1|210534_s_at	0.817744	0.00546062
GPLD1	0.884538	0.786603	0.994666	0.0404339	0.842386	0.00994592	UP	Hesperidin	GPLD1|206264_at	0.543241	0.0218427
SMAD5	1.3837	1.03898	1.84279	0.0263165	0.899666	9.29624e-05	UR	Hesperidin	SMAD5|205187_at	1.28526	0.00290353
SMAD5	1.3837	1.03898	1.84279	0.0263165	0.899666	9.29624e-05	UR	Hesperidin	SMAD5|205188_s_at	1.74911	0.00319778
NKTR	0.782871	0.613967	0.998241	0.0483634	-0.857731	0.029324	DP	Hesperidin	NKTR|202379_s_at	0.504503	0.0272409
NKTR	0.782871	0.613967	0.998241	0.0483634	-0.857731	0.029324	DP	Hesperidin	NKTR|215338_s_at	0.773254	0.0123544
HSPH1	1.29343	1.05363	1.5878	0.0139213	-1.18808	0.00799231	DR	Hesperidin	HSPH1|206976_s_at	-0.6766	0.00274784
HSPH1	1.29343	1.05363	1.5878	0.0139213	-1.18808	0.00799231	DR	Hesperidin	HSPH1|208744_x_at	1.17445	0.0134109
NFE2	0.837903	0.760061	0.923719	0.000378044	0.95057	0.0197538	UP	Hesperidin	NFE2|209930_s_at	2.52935	0.00669003
STAT5A	0.806238	0.674271	0.964033	0.018196	0.731619	0.0243399	UP	Hesperidin	STAT5A|203010_at	1.4986	0.00928145
BST2	0.902419	0.815255	0.998902	0.0475742	1.43158	0.00292765	UP	Hesperidin	BST2|201641_at	-1.63447	0.037555
CCNA1	0.847772	0.765215	0.939235	0.00158196	1.18635	0.019463	UP	Hesperidin	CCNA1|205899_at	2.6865	0.0150014
BLK	0.899584	0.831928	0.972741	0.00798361	2.5648	0.000809085	UP	Hesperidin	BLK|210934_at	3.22014	0.0281888
RDX	1.24084	1.0063	1.53003	0.0435123	2.1846	0.00762614	UR	Hesperidin	RDX|204969_s_at	0.729152	0.0160438
RDX	1.24084	1.0063	1.53003	0.0435123	2.1846	0.00762614	UR	Hesperidin	RDX|212398_at	1.04018	0.016415
ESR2	0.773404	0.646698	0.924935	0.00488153	-1.09315	0.0168113	DP	Hesperidin	ESR2|211118_x_at	-1.83617	0.0439296
OSBPL1A	0.759189	0.624002	0.923664	0.00589396	-1.06865	0.00331599	DP	Hesperidin	OSBPL1A|209485_s_at	-0.503497	0.0223057
PMAIP1	0.851132	0.758668	0.954864	0.00601239	1.99112	0.0240982	UP	Hesperidin	PMAIP1|204286_s_at	-0.677022	0.0187277
RPS11	0.712567	0.558205	0.909614	0.0065188	0.547105	0.0485921	UP	Hesperidin	RPS11|213350_at	-2.50619	0.00161835
NTRK2	0.902823	0.831126	0.980706	0.0154597	1.26225	0.00347418	UP	Hesperidin	NTRK2|207152_at	3.44241	0.00337848
CABYR	0.821544	0.713662	0.945735	0.00620507	-0.731189	0.0150192	DP	Hesperidin	CABYR|219928_s_at	0.637036	0.0475309
NPY1R	0.929391	0.885143	0.975851	0.00325952	2.8446	0.032752	UP	Hesperidin	NPY1R|205440_s_at	1.5641	0.0253542
CCT2	1.27593	1.00278	1.62349	0.0474168	-0.530121	0.0395902	DR	Hesperidin	CCT2|201946_s_at	1.14351	0.00121157
GSTM4	0.728221	0.618568	0.857311	0.000139574	1.03388	0.00560629	UP	Hesperidin	GSTM4|210912_x_at	-0.546664	0.0320917
ATF5	0.791604	0.628565	0.996931	0.0470238	-0.61731	0.00214719	DP	Hesperidin	ATF5|204999_s_at	1.13126	0.00178254
SERPINB9	0.836411	0.720185	0.971394	0.0192749	-0.713131	0.0156784	DP	Hesperidin	SERPINB9|209723_at	-1.00577	0.0471435
TLN2	0.833613	0.695783	0.998745	0.0484298	-0.927363	0.00221108	DP	Hesperidin	TLN2|212701_at	-0.894174	0.0494054
RASGRP1	0.897784	0.817382	0.986095	0.0242915	1.59482	0.0431577	UP	Hesperidin	RASGRP1|205590_at	0.555911	0.0167256
PSMD1	1.57189	1.08944	2.26799	0.015608	-0.720859	0.0182201	DR	Hesperidin	PSMD1|201199_s_at	-0.500461	0.018147
DTX3	0.778381	0.643912	0.94093	0.00962017	0.61891	0.0301964	UP	Hesperidin	DTX3|49051_g_at	-1.04384	0.0206422
EGR3	0.887756	0.813796	0.968438	0.00730609	1.48483	0.0198331	UP	Hesperidin	EGR3|206115_at	0.892151	0.0137848
SIAH2	0.759912	0.646104	0.893767	0.000910778	0.720591	0.0280097	UP	Hesperidin	SIAH2|209339_at	1.04057	0.00835483
WWOX	1.25767	1.09301	1.44713	0.00136392	1.17696	0.009425	UR	Hesperidin	WWOX|210695_s_at	0.579972	0.0321101
WWOX	1.25767	1.09301	1.44713	0.00136392	1.17696	0.009425	UR	Hesperidin	WWOX|219077_s_at	0.690352	0.0442744
MST1P2	0.891528	0.796883	0.997415	0.0449446	0.69918	0.0239207	UP	Hesperidin	MST1P2|213380_x_at	0.945905	0.038776
ZNF75D	1.46618	1.08796	1.97589	0.0119444	0.568738	0.0131017	UR	Hesperidin	ZNF75D|214813_at	0.883365	0.0359193
LIME1	0.874153	0.786964	0.971001	0.012111	-0.527166	0.0479711	DP	Hesperidin	LIME1|57539_at	-0.551534	0.00117705
PCDHGA1	1.1412	1.03674	1.25619	0.00700487	-1.31641	0.0142935	DR	Hesperidin	PCDHGA1|211066_x_at	-0.561354	0.0477973
ATP6AP1	1.31326	1.0099	1.70775	0.0420083	-0.603343	0.0143174	DR	Ginkgolide B	ATP6AP1|207809_s_at	0.520386	0.0430826
HSP90AA1	1.45205	1.16126	1.81567	0.00107115	-0.837049	0.012135	DR	Ginkgolide B	HSP90AA1|210211_s_at	-0.585183	0.0494941
HSP90AA1	1.45205	1.16126	1.81567	0.00107115	-0.837049	0.012135	DR	Ginkgolide B	HSP90AA1|214328_s_at	-0.564568	0.042946
RPGRIP1	0.844091	0.719107	0.990797	0.038168	-1.21953	0.0109196	DP	Ginkgolide B	RPGRIP1|206608_s_at	0.892977	0.0452657
SQLE	1.17109	1.01247	1.35455	0.0334286	-1.23331	0.00275383	DR	Ginkgolide B	SQLE|213562_s_at	1.11701	0.0312523
CADM4	0.827547	0.714254	0.95881	0.0117384	1.13849	0.00103286	UP	Ginkgolide B	CADM4|214267_s_at	-3.65149	0.0345771
CADM4	0.827547	0.714254	0.95881	0.0117384	1.13849	0.00103286	UP	Ginkgolide B	CADM4|215259_s_at	1.55982	0.0417484
TFPI2	0.863383	0.80825	0.922277	1.28211e-05	-2.19854	0.0243707	DP	Ginkgolide B	TFPI2|209278_s_at	0.818838	0.00434051
B9D1	0.814768	0.681996	0.973389	0.023999	0.871076	0.00170412	UP	Ginkgolide B	B9D1|210534_s_at	0.788477	0.0112519
B9D1	0.814768	0.681996	0.973389	0.023999	0.871076	0.00170412	UP	Ginkgolide B	B9D1|210535_at	-0.870166	0.0209127
BACH2	0.889732	0.792249	0.999208	0.0484571	1.56354	0.00420312	UP	Ginkgolide B	BACH2|221234_s_at	0.736307	0.0428044
LIFR	0.851201	0.755113	0.959516	0.00838425	-0.619908	0.0155398	DP	Ginkgolide B	LIFR|205876_at	1.70747	0.0250231
SMAD5	1.3837	1.03898	1.84279	0.0263165	0.899666	9.29624e-05	UR	Ginkgolide B	SMAD5|205188_s_at	1.61457	0.0455198
NKTR	0.782871	0.613967	0.998241	0.0483634	-0.857731	0.029324	DP	Ginkgolide B	NKTR|215338_s_at	0.793738	0.030195
HSPH1	1.29343	1.05363	1.5878	0.0139213	-1.18808	0.00799231	DR	Ginkgolide B	HSPH1|206976_s_at	-0.639405	0.00109736
RPL5	0.677671	0.529342	0.867563	0.00202079	0.595441	0.0299195	UP	Ginkgolide B	RPL5|210034_s_at	-0.682109	0.0104015
NFE2	0.837903	0.760061	0.923719	0.000378044	0.95057	0.0197538	UP	Ginkgolide B	NFE2|209930_s_at	2.79932	0.0230832
CCNA1	0.847772	0.765215	0.939235	0.00158196	1.18635	0.019463	UP	Ginkgolide B	CCNA1|205899_at	3.40399	0.0112302
PTPN22	0.887953	0.794392	0.992533	0.036448	-0.765346	0.00689782	DP	Ginkgolide B	PTPN22|208010_s_at	-3.5058	0.010129
HNRNPA1	0.637302	0.448911	0.904754	0.0117421	0.573658	0.0153167	UP	Ginkgolide B	HNRNPA1|222040_at	0.949763	0.0262002
REPS1	1.55073	1.16259	2.06846	0.00283656	-0.580046	0.0092244	DR	Ginkgolide B	REPS1|215201_at	-1.59866	0.0410024
RDH16	1.11024	1.0195	1.20905	0.0162202	-0.87718	0.0361044	DR	Ginkgolide B	RDH16|206753_at	0.723786	0.0335951
RPS11	0.712567	0.558205	0.909614	0.0065188	0.547105	0.0485921	UP	Ginkgolide B	RPS11|213350_at	-2.63305	0.0449969
NTRK2	0.902823	0.831126	0.980706	0.0154597	1.26225	0.00347418	UP	Ginkgolide B	NTRK2|207152_at	2.58098	0.0015334
ZFP36L2	0.83299	0.698995	0.99267	0.0411334	1.21225	0.00710625	UP	Ginkgolide B	ZFP36L2|201367_s_at	3.24142	0.0471535
CCT2	1.27593	1.00278	1.62349	0.0474168	-0.530121	0.0395902	DR	Ginkgolide B	CCT2|201946_s_at	0.814029	0.0134928
ATF5	0.791604	0.628565	0.996931	0.0470238	-0.61731	0.00214719	DP	Ginkgolide B	ATF5|204999_s_at	1.13151	0.0062348
TLN2	0.833613	0.695783	0.998745	0.0484298	-0.927363	0.00221108	DP	Ginkgolide B	TLN2|212701_at	-1.99212	0.0187749
RASGRP1	0.897784	0.817382	0.986095	0.0242915	1.59482	0.0431577	UP	Ginkgolide B	RASGRP1|205590_at	0.641406	0.0136784
PSMD1	1.57189	1.08944	2.26799	0.015608	-0.720859	0.0182201	DR	Ginkgolide B	PSMD1|201199_s_at	-0.511518	0.0188097
SCUBE2	0.945437	0.898299	0.995048	0.0315401	-1.15654	0.00740076	DP	Ginkgolide B	SCUBE2|219197_s_at	0.508571	0.0416349
SGSH	0.692637	0.513894	0.93355	0.0158886	-0.638242	0.00192707	DP	Ginkgolide B	SGSH|35626_at	-0.539442	0.0110744
MST1P2	0.891528	0.796883	0.997415	0.0449446	0.69918	0.0239207	UP	Ginkgolide B	MST1P2|213380_x_at	1.11981	0.0061571
ZNF75D	1.46618	1.08796	1.97589	0.0119444	0.568738	0.0131017	UR	Ginkgolide B	ZNF75D|214813_at	0.80618	0.0401499
SERPINA1	0.833568	0.762578	0.911167	6.11255e-05	1.83109	0.0415314	UP	Ginkgolide B	SERPINA1|211428_at	3.87216	0.00501578
LIME1	0.874153	0.786964	0.971001	0.012111	-0.527166	0.0479711	DP	Ginkgolide B	LIME1|57539_at	-0.545645	0.0164701
APOM	0.841745	0.728689	0.972342	0.0192265	0.968185	0.0210961	UP	Ginkgolide B	APOM|205682_x_at	0.812625	0.0414595
RGL3	0.911448	0.848142	0.97948	0.0115873	3.43248	0.000766773	UP	Ginkgolide B	RGL3|215054_at	0.836283	0.0488867
ERCC1	0.668625	0.495232	0.902727	0.00858632	0.798187	0.036459	UP	Saikosaponin D	ERCC1|203720_s_at	0.648945	0.0347105
PEX3	1.38991	1.0576	1.82663	0.0181907	-0.663254	0.0311167	DR	Saikosaponin D	PEX3|203969_at	-0.801582	0.00592152
TP63	0.895433	0.835731	0.959399	0.00170513	2.45926	0.00352212	UP	Saikosaponin D	TP63|209863_s_at	0.819599	0.0201143
TFPI2	0.863383	0.80825	0.922277	1.28211e-05	-2.19854	0.0243707	DP	Saikosaponin D	TFPI2|209278_s_at	0.979261	0.0222986
B9D1	0.814768	0.681996	0.973389	0.023999	0.871076	0.00170412	UP	Saikosaponin D	B9D1|210534_s_at	0.782428	0.00421057
LIFR	0.851201	0.755113	0.959516	0.00838425	-0.619908	0.0155398	DP	Saikosaponin D	LIFR|205876_at	2.09495	0.0050197
SMAD5	1.3837	1.03898	1.84279	0.0263165	0.899666	9.29624e-05	UR	Saikosaponin D	SMAD5|205188_s_at	0.763035	0.014754
GBP1	0.870173	0.779125	0.971861	0.0136581	1.76729	0.0118094	UP	Saikosaponin D	GBP1|202270_at	2.37973	0.0187256
STAT5A	0.806238	0.674271	0.964033	0.018196	0.731619	0.0243399	UP	Saikosaponin D	STAT5A|203010_at	1.97256	0.00323759
APOL2	0.776288	0.633337	0.951505	0.0147406	-0.69624	0.0135996	DP	Saikosaponin D	APOL2|221013_s_at	-1.68979	0.0245547
HNRNPA1	0.637302	0.448911	0.904754	0.0117421	0.573658	0.0153167	UP	Saikosaponin D	HNRNPA1|222040_at	1.39246	0.0139927
BLK	0.899584	0.831928	0.972741	0.00798361	2.5648	0.000809085	UP	Saikosaponin D	BLK|206255_at	1.68166	0.0217584
BLK	0.899584	0.831928	0.972741	0.00798361	2.5648	0.000809085	UP	Saikosaponin D	BLK|210934_at	3.29429	0.031821
SLC39A8	0.836641	0.721053	0.970758	0.0187137	-1.11532	0.0210013	DP	Saikosaponin D	SLC39A8|209267_s_at	0.522691	0.000197276
ESR2	0.773404	0.646698	0.924935	0.00488153	-1.09315	0.0168113	DP	Saikosaponin D	ESR2|211117_x_at	3.92282	0.0310336
RPS11	0.712567	0.558205	0.909614	0.0065188	0.547105	0.0485921	UP	Saikosaponin D	RPS11|213350_at	-1.72817	0.0223887
TNFAIP8	0.793556	0.658078	0.956926	0.0154803	1.1739	0.00583217	UP	Saikosaponin D	TNFAIP8|210260_s_at	0.616232	0.0421081
NTRK2	0.902823	0.831126	0.980706	0.0154597	1.26225	0.00347418	UP	Saikosaponin D	NTRK2|207152_at	2.58245	0.0120886
NTRK2	0.902823	0.831126	0.980706	0.0154597	1.26225	0.00347418	UP	Saikosaponin D	NTRK2|221796_at	-1.2524	0.0224116
PDCD4	0.809773	0.700083	0.93665	0.00449418	0.806707	0.0418405	UP	Saikosaponin D	PDCD4|212594_at	-0.555257	0.0301045
ZFP36L2	0.83299	0.698995	0.99267	0.0411334	1.21225	0.00710625	UP	Saikosaponin D	ZFP36L2|201367_s_at	3.49432	0.0431708
STK17A	0.720604	0.565252	0.918653	0.00817336	-0.517328	0.0315696	DP	Saikosaponin D	STK17A|202694_at	0.724198	0.019219
CCT2	1.27593	1.00278	1.62349	0.0474168	-0.530121	0.0395902	DR	Saikosaponin D	CCT2|201946_s_at	0.63158	0.030197
ATF5	0.791604	0.628565	0.996931	0.0470238	-0.61731	0.00214719	DP	Saikosaponin D	ATF5|204999_s_at	0.687347	0.0126656
RASGRP1	0.897784	0.817382	0.986095	0.0242915	1.59482	0.0431577	UP	Saikosaponin D	RASGRP1|205590_at	0.813523	0.00718598
TP53I11	1.31094	1.04761	1.64047	0.0179584	0.623038	0.0143908	UR	Saikosaponin D	TP53I11|216919_at	1.31778	0.0324952
SCUBE2	0.945437	0.898299	0.995048	0.0315401	-1.15654	0.00740076	DP	Saikosaponin D	SCUBE2|219197_s_at	0.581362	0.00480358
EIF3F	0.685702	0.502515	0.935667	0.0173467	0.50653	0.0236911	UP	Saikosaponin D	EIF3F|200865_at	-2.88687	0.0147149
ARL4D	0.862721	0.752914	0.988543	0.0335147	2.86442	0.00170836	UP	Saikosaponin D	ARL4D|203587_at	-1.17317	0.0389297
CALML3	0.926957	0.880579	0.975777	0.00377577	1.16309	0.0187678	UP	Saikosaponin D	CALML3|210020_x_at	-0.543349	0.000425516
EGR3	0.887756	0.813796	0.968438	0.00730609	1.48483	0.0198331	UP	Saikosaponin D	EGR3|206115_at	0.697144	0.0145685
TNFAIP2	0.849121	0.730359	0.987194	0.0333676	1.92497	0.00253009	UP	Saikosaponin D	TNFAIP2|202510_s_at	-1.49877	0.0165725
WWOX	1.25767	1.09301	1.44713	0.00136392	1.17696	0.009425	UR	Saikosaponin D	WWOX|210695_s_at	0.610872	0.0225261
MST1P2	0.891528	0.796883	0.997415	0.0449446	0.69918	0.0239207	UP	Saikosaponin D	MST1P2|213380_x_at	0.81591	0.00381843
SIRT7	0.742337	0.581829	0.947124	0.0165297	-0.55638	0.0352673	DP	Saikosaponin D	SIRT7|218797_s_at	-0.716344	0.0211263
SERPINA1	0.833568	0.762578	0.911167	6.11255e-05	1.83109	0.0415314	UP	Saikosaponin D	SERPINA1|211429_s_at	0.836643	0.0283411
RGL3	0.911448	0.848142	0.97948	0.0115873	3.43248	0.000766773	UP	Saikosaponin D	RGL3|215054_at	1.03212	0.031738
ERCC1	0.668625	0.495232	0.902727	0.00858632	0.798187	0.036459	UP	棺-ecdysterone	ERCC1|203720_s_at	0.703358	0.0421645
TRAF1	0.800699	0.69158	0.927034	0.00294374	1.69095	0.00982732	UP	棺-ecdysterone	TRAF1|205599_at	-1.43944	0.0318117
ATP6AP1	1.31326	1.0099	1.70775	0.0420083	-0.603343	0.0143174	DR	棺-ecdysterone	ATP6AP1|207809_s_at	0.532675	0.0154277
HSP90AA1	1.45205	1.16126	1.81567	0.00107115	-0.837049	0.012135	DR	棺-ecdysterone	HSP90AA1|211969_at	-0.510837	0.0224033
HSP90AA1	1.45205	1.16126	1.81567	0.00107115	-0.837049	0.012135	DR	棺-ecdysterone	HSP90AA1|214328_s_at	-0.758273	0.00298317
TESC	0.871084	0.782908	0.969192	0.0112558	1.37269	0.0181298	UP	棺-ecdysterone	TESC|218872_at	0.544055	0.0313695
B9D1	0.814768	0.681996	0.973389	0.023999	0.871076	0.00170412	UP	棺-ecdysterone	B9D1|205662_at	-0.534603	0.0237343
GPLD1	0.884538	0.786603	0.994666	0.0404339	0.842386	0.00994592	UP	棺-ecdysterone	GPLD1|215554_at	-0.790687	0.0466943
SMAD5	1.3837	1.03898	1.84279	0.0263165	0.899666	9.29624e-05	UR	棺-ecdysterone	SMAD5|205188_s_at	0.972386	0.0172077
RPL24	0.761286	0.593477	0.976545	0.031811	0.884703	0.0167652	UP	棺-ecdysterone	RPL24|200013_at	-0.586364	0.0419461
IFT57	0.734906	0.573439	0.941837	0.0149593	0.737613	0.0222441	UP	棺-ecdysterone	IFT57|218100_s_at	-0.556718	0.0334547
GBP1	0.870173	0.779125	0.971861	0.0136581	1.76729	0.0118094	UP	棺-ecdysterone	GBP1|202270_at	3.18854	0.032711
RPS25	0.75896	0.603203	0.954935	0.0186008	0.755131	0.0341657	UP	棺-ecdysterone	RPS25|200091_s_at	-0.557337	0.0195373
RPL5	0.677671	0.529342	0.867563	0.00202079	0.595441	0.0299195	UP	棺-ecdysterone	RPL5|210034_s_at	-0.560814	0.0426613
STAT5A	0.806238	0.674271	0.964033	0.018196	0.731619	0.0243399	UP	棺-ecdysterone	STAT5A|203010_at	2.13077	0.000864909
BST2	0.902419	0.815255	0.998902	0.0475742	1.43158	0.00292765	UP	棺-ecdysterone	BST2|201641_at	-0.881255	0.0119205
HNRNPA1	0.637302	0.448911	0.904754	0.0117421	0.573658	0.0153167	UP	棺-ecdysterone	HNRNPA1|200016_x_at	-0.543602	0.0257414
HNRNPA1	0.637302	0.448911	0.904754	0.0117421	0.573658	0.0153167	UP	棺-ecdysterone	HNRNPA1|213356_x_at	-0.53127	0.0390478
MICAL1	0.798048	0.663271	0.960212	0.0168416	-1.17499	0.000910863	DP	棺-ecdysterone	MICAL1|218376_s_at	0.637318	0.00984648
BLK	0.899584	0.831928	0.972741	0.00798361	2.5648	0.000809085	UP	棺-ecdysterone	BLK|206255_at	1.07722	0.0489491
BLK	0.899584	0.831928	0.972741	0.00798361	2.5648	0.000809085	UP	棺-ecdysterone	BLK|210934_at	4.27365	0.0177642
CNPY3	0.743482	0.569517	0.970585	0.0292949	-0.5073	0.0165277	DP	棺-ecdysterone	CNPY3|217931_at	0.858001	0.0196788
ESR2	0.773404	0.646698	0.924935	0.00488153	-1.09315	0.0168113	DP	棺-ecdysterone	ESR2|211118_x_at	1.32003	0.0359621
RPS11	0.712567	0.558205	0.909614	0.0065188	0.547105	0.0485921	UP	棺-ecdysterone	RPS11|213350_at	-2.16914	0.00348384
NTRK2	0.902823	0.831126	0.980706	0.0154597	1.26225	0.00347418	UP	棺-ecdysterone	NTRK2|207152_at	2.57887	0.00146686
ZFP36L2	0.83299	0.698995	0.99267	0.0411334	1.21225	0.00710625	UP	棺-ecdysterone	ZFP36L2|201368_at	-0.645462	0.0033834
RPS14	0.780611	0.616312	0.988708	0.0399616	0.910178	0.0284209	UP	棺-ecdysterone	RPS14|208645_s_at	-0.661452	0.0150325
RASGRP1	0.897784	0.817382	0.986095	0.0242915	1.59482	0.0431577	UP	棺-ecdysterone	RASGRP1|205590_at	-1.48489	0.0035174
TP53I11	1.31094	1.04761	1.64047	0.0179584	0.623038	0.0143908	UR	棺-ecdysterone	TP53I11|216919_at	1.80338	0.00728419
SCUBE2	0.945437	0.898299	0.995048	0.0315401	-1.15654	0.00740076	DP	棺-ecdysterone	SCUBE2|219197_s_at	0.597428	0.00312703
EIF3F	0.685702	0.502515	0.935667	0.0173467	0.50653	0.0236911	UP	棺-ecdysterone	EIF3F|200865_at	-2.58458	0.017386
NDUFAF3	0.794521	0.631881	0.999023	0.0490307	-0.707824	0.0087317	DP	棺-ecdysterone	NDUFAF3|209177_at	0.542561	0.0323143
EGR3	0.887756	0.813796	0.968438	0.00730609	1.48483	0.0198331	UP	棺-ecdysterone	EGR3|206115_at	0.848227	0.0141718
MST1P2	0.891528	0.796883	0.997415	0.0449446	0.69918	0.0239207	UP	棺-ecdysterone	MST1P2|213380_x_at	0.531615	0.0295855
ZNF75D	1.46618	1.08796	1.97589	0.0119444	0.568738	0.0131017	UR	棺-ecdysterone	ZNF75D|213659_at	-0.501073	0.021073
EIF4EBP1	1.16139	1.01819	1.32474	0.0258554	0.783759	0.0129625	UR	棺-ecdysterone	EIF4EBP1|221539_at	0.601817	0.0348815
SERPINA1	0.833568	0.762578	0.911167	6.11255e-05	1.83109	0.0415314	UP	棺-ecdysterone	SERPINA1|211428_at	3.29122	0.00382855
SERPINA1	0.833568	0.762578	0.911167	6.11255e-05	1.83109	0.0415314	UP	棺-ecdysterone	SERPINA1|211429_s_at	1.58579	0.0283209
MICB	0.867332	0.760993	0.988531	0.0329394	-2.30236	0.00351529	DP	棺-ecdysterone	MICB|206247_at	0.907137	0.0489741
ERCC1	0.668625	0.495232	0.902727	0.00858632	0.798187	0.036459	UP	Osthole	ERCC1|203720_s_at	0.842081	0.00719193
CYP24A1	0.868571	0.79927	0.943881	0.000895906	4.50911	0.00626847	UP	Osthole	CYP24A1|206504_at	-0.714509	0.0308661
PEX3	1.38991	1.0576	1.82663	0.0181907	-0.663254	0.0311167	DR	Osthole	PEX3|203969_at	-0.909939	0.0370324
PEX3	1.38991	1.0576	1.82663	0.0181907	-0.663254	0.0311167	DR	Osthole	PEX3|203970_s_at	-0.533262	0.00174334
CYBA	0.856253	0.754196	0.972119	0.0165452	3.09865	0.00618658	UP	Osthole	CYBA|203028_s_at	0.627862	0.00206707
ACAA1	0.739187	0.581464	0.939692	0.013589	-0.813662	0.000219263	DP	Osthole	ACAA1|202025_x_at	0.539389	0.0262521
SYT1	0.935468	0.883442	0.990557	0.0223158	0.702441	0.0227156	UP	Osthole	SYT1|203998_s_at	-1.08878	0.0204472
ATP6AP1	1.31326	1.0099	1.70775	0.0420083	-0.603343	0.0143174	DR	Osthole	ATP6AP1|207809_s_at	0.670384	0.00308492
TP63	0.895433	0.835731	0.959399	0.00170513	2.45926	0.00352212	UP	Osthole	TP63|209863_s_at	-0.809753	0.0232055
AMPH	0.906719	0.831365	0.988902	0.0269614	-4.06597	0.000516736	DP	Osthole	AMPH|205257_s_at	-0.89952	0.0375652
HSP90AA1	1.45205	1.16126	1.81567	0.00107115	-0.837049	0.012135	DR	Osthole	HSP90AA1|211968_s_at	0.850232	0.0116377
SQLE	1.17109	1.01247	1.35455	0.0334286	-1.23331	0.00275383	DR	Osthole	SQLE|213562_s_at	1.52399	0.0184697
TFPI2	0.863383	0.80825	0.922277	1.28211e-05	-2.19854	0.0243707	DP	Osthole	TFPI2|209278_s_at	-0.85142	0.00141041
B9D1	0.814768	0.681996	0.973389	0.023999	0.871076	0.00170412	UP	Osthole	B9D1|205662_at	-0.793496	0.0202817
GPLD1	0.884538	0.786603	0.994666	0.0404339	0.842386	0.00994592	UP	Osthole	GPLD1|215554_at	-1.81354	0.0179337
IFT57	0.734906	0.573439	0.941837	0.0149593	0.737613	0.0222441	UP	Osthole	IFT57|218100_s_at	-0.545727	0.0428654
CNPY3	0.743482	0.569517	0.970585	0.0292949	-0.5073	0.0165277	DP	Osthole	CNPY3|217931_at	1.03695	0.00200483
CYP1B1	0.884614	0.791722	0.988405	0.0303113	-0.793976	0.0081546	DP	Osthole	CYP1B1|202436_s_at	-0.582356	0.00817036
RPS11	0.712567	0.558205	0.909614	0.0065188	0.547105	0.0485921	UP	Osthole	RPS11|213350_at	-1.94019	0.0398162
OSBPL10	1.26436	1.02556	1.55877	0.0280704	-0.579902	0.0010835	DR	Osthole	OSBPL10|216755_at	-0.711839	0.00725721
NTRK2	0.902823	0.831126	0.980706	0.0154597	1.26225	0.00347418	UP	Osthole	NTRK2|207152_at	2.96738	0.0151898
PAK1	0.778242	0.632695	0.957271	0.0176278	1.44611	0.0053251	UP	Osthole	PAK1|209615_s_at	1.0194	0.0447883
PDCD4	0.809773	0.700083	0.93665	0.00449418	0.806707	0.0418405	UP	Osthole	PDCD4|202731_at	1.13792	0.0244658
ZFP36L2	0.83299	0.698995	0.99267	0.0411334	1.21225	0.00710625	UP	Osthole	ZFP36L2|201367_s_at	3.43457	0.0425085
ZFP36L2	0.83299	0.698995	0.99267	0.0411334	1.21225	0.00710625	UP	Osthole	ZFP36L2|201368_at	-0.679095	0.002888
CCT2	1.27593	1.00278	1.62349	0.0474168	-0.530121	0.0395902	DR	Osthole	CCT2|201946_s_at	1.29405	0.000870089
ATF5	0.791604	0.628565	0.996931	0.0470238	-0.61731	0.00214719	DP	Osthole	ATF5|204999_s_at	0.628191	0.0275316
RASGRP1	0.897784	0.817382	0.986095	0.0242915	1.59482	0.0431577	UP	Osthole	RASGRP1|205590_at	-1.48447	0.0150544
SCUBE2	0.945437	0.898299	0.995048	0.0315401	-1.15654	0.00740076	DP	Osthole	SCUBE2|219197_s_at	0.676131	0.00327819
NDUFAF3	0.794521	0.631881	0.999023	0.0490307	-0.707824	0.0087317	DP	Osthole	NDUFAF3|209177_at	0.669532	0.00809185
EGR3	0.887756	0.813796	0.968438	0.00730609	1.48483	0.0198331	UP	Osthole	EGR3|206115_at	0.590151	0.020309
SIAH2	0.759912	0.646104	0.893767	0.000910778	0.720591	0.0280097	UP	Osthole	SIAH2|209339_at	1.15398	0.00339011
PRKG1	1.11595	1.00741	1.23618	0.0356123	-1.52519	0.00880079	DR	Osthole	PRKG1|207119_at	2.5475	0.0475872
EIF4EBP1	1.16139	1.01819	1.32474	0.0258554	0.783759	0.0129625	UR	Osthole	EIF4EBP1|221539_at	0.776983	0.0214365
SERPINA1	0.833568	0.762578	0.911167	6.11255e-05	1.83109	0.0415314	UP	Osthole	SERPINA1|202833_s_at	1.42301	0.0059508
SERPINA1	0.833568	0.762578	0.911167	6.11255e-05	1.83109	0.0415314	UP	Osthole	SERPINA1|211429_s_at	1.8888	0.0031072
LY6G5C	0.83682	0.705237	0.992954	0.041253	-0.882802	0.0172129	DP	Osthole	LY6G5C|219860_at	0.791796	0.0384412
ERCC1	0.668625	0.495232	0.902727	0.00858632	0.798187	0.036459	UP	L-scopolamine	ERCC1|203720_s_at	0.616311	0.026685
CYP24A1	0.868571	0.79927	0.943881	0.000895906	4.50911	0.00626847	UP	L-scopolamine	CYP24A1|206504_at	-1.08055	0.0395824
CYBA	0.856253	0.754196	0.972119	0.0165452	3.09865	0.00618658	UP	L-scopolamine	CYBA|203028_s_at	0.643602	0.000885767
TRAF1	0.800699	0.69158	0.927034	0.00294374	1.69095	0.00982732	UP	L-scopolamine	TRAF1|205599_at	-1.31238	0.0470241
SYT1	0.935468	0.883442	0.990557	0.0223158	0.702441	0.0227156	UP	L-scopolamine	SYT1|203998_s_at	-0.562381	0.0487567
RASGRP2	0.90381	0.817214	0.999582	0.0490565	1.74272	0.000176205	UP	L-scopolamine	RASGRP2|208206_s_at	-1.32959	0.0256748
RASGRP2	0.90381	0.817214	0.999582	0.0490565	1.74272	0.000176205	UP	L-scopolamine	RASGRP2|214369_s_at	-0.903378	0.0223788
ATP6AP1	1.31326	1.0099	1.70775	0.0420083	-0.603343	0.0143174	DR	L-scopolamine	ATP6AP1|207809_s_at	0.68401	0.00844819
TP63	0.895433	0.835731	0.959399	0.00170513	2.45926	0.00352212	UP	L-scopolamine	TP63|211834_s_at	-2.96552	0.0292021
AMPH	0.906719	0.831365	0.988902	0.0269614	-4.06597	0.000516736	DP	L-scopolamine	AMPH|205257_s_at	-1.17249	0.0179862
HSP90AA1	1.45205	1.16126	1.81567	0.00107115	-0.837049	0.012135	DR	L-scopolamine	HSP90AA1|210211_s_at	-0.555835	0.00285242
HSP90AA1	1.45205	1.16126	1.81567	0.00107115	-0.837049	0.012135	DR	L-scopolamine	HSP90AA1|211968_s_at	0.959706	0.0135227
HSP90AA1	1.45205	1.16126	1.81567	0.00107115	-0.837049	0.012135	DR	L-scopolamine	HSP90AA1|211969_at	-0.544678	0.00502413
HSP90AA1	1.45205	1.16126	1.81567	0.00107115	-0.837049	0.012135	DR	L-scopolamine	HSP90AA1|214328_s_at	-0.619301	8.3248e-05
SQLE	1.17109	1.01247	1.35455	0.0334286	-1.23331	0.00275383	DR	L-scopolamine	SQLE|213562_s_at	1.61012	0.0149959
TFPI2	0.863383	0.80825	0.922277	1.28211e-05	-2.19854	0.0243707	DP	L-scopolamine	TFPI2|209278_s_at	-0.882835	0.00344405
LIFR	0.851201	0.755113	0.959516	0.00838425	-0.619908	0.0155398	DP	L-scopolamine	LIFR|205876_at	1.88348	0.0168555
IFT57	0.734906	0.573439	0.941837	0.0149593	0.737613	0.0222441	UP	L-scopolamine	IFT57|218100_s_at	-0.520527	0.00159763
GBP1	0.870173	0.779125	0.971861	0.0136581	1.76729	0.0118094	UP	L-scopolamine	GBP1|202270_at	3.01975	0.0136867
HSPH1	1.29343	1.05363	1.5878	0.0139213	-1.18808	0.00799231	DR	L-scopolamine	HSPH1|208744_x_at	0.872416	0.0182695
RPL5	0.677671	0.529342	0.867563	0.00202079	0.595441	0.0299195	UP	L-scopolamine	RPL5|213080_x_at	-0.54944	0.0090749
BST2	0.902419	0.815255	0.998902	0.0475742	1.43158	0.00292765	UP	L-scopolamine	BST2|201641_at	-0.971909	0.00780474
CCNA1	0.847772	0.765215	0.939235	0.00158196	1.18635	0.019463	UP	L-scopolamine	CCNA1|205899_at	2.8459	0.0200567
BTG1	0.729839	0.584047	0.912023	0.00560682	1.13706	0.0217191	UP	L-scopolamine	BTG1|200921_s_at	-0.696983	0.0148274
CCNJL	0.886932	0.792788	0.992256	0.0361041	2.20658	8.20633e-05	UP	L-scopolamine	CCNJL|219227_at	-1.00723	0.00238091
HNRNPA1	0.637302	0.448911	0.904754	0.0117421	0.573658	0.0153167	UP	L-scopolamine	HNRNPA1|222040_at	0.707787	0.03485
REPS1	1.55073	1.16259	2.06846	0.00283656	-0.580046	0.0092244	DR	L-scopolamine	REPS1|215201_at	-1.51263	0.0461744
BLK	0.899584	0.831928	0.972741	0.00798361	2.5648	0.000809085	UP	L-scopolamine	BLK|210934_at	3.24199	0.0287191
CNPY3	0.743482	0.569517	0.970585	0.0292949	-0.5073	0.0165277	DP	L-scopolamine	CNPY3|217931_at	0.848533	0.00937227
CYP1B1	0.884614	0.791722	0.988405	0.0303113	-0.793976	0.0081546	DP	L-scopolamine	CYP1B1|202435_s_at	-0.514466	0.0104512
RPS11	0.712567	0.558205	0.909614	0.0065188	0.547105	0.0485921	UP	L-scopolamine	RPS11|213350_at	-2.7975	0.00216472
PLAC8	0.87431	0.802924	0.952043	0.00199588	-0.927298	0.0425076	DP	L-scopolamine	PLAC8|219014_at	-1.21248	0.0369711
TNFAIP8	0.793556	0.658078	0.956926	0.0154803	1.1739	0.00583217	UP	L-scopolamine	TNFAIP8|208296_x_at	-0.574942	0.0237614
NTRK2	0.902823	0.831126	0.980706	0.0154597	1.26225	0.00347418	UP	L-scopolamine	NTRK2|207152_at	3.02068	0.0010851
PDCD4	0.809773	0.700083	0.93665	0.00449418	0.806707	0.0418405	UP	L-scopolamine	PDCD4|202731_at	1.16043	0.0222892
ZFP36L2	0.83299	0.698995	0.99267	0.0411334	1.21225	0.00710625	UP	L-scopolamine	ZFP36L2|201368_at	-0.619944	0.00358414
ZFP36L2	0.83299	0.698995	0.99267	0.0411334	1.21225	0.00710625	UP	L-scopolamine	ZFP36L2|201369_s_at	-0.729989	0.0142363
GBP2	0.786174	0.681481	0.90695	0.000968757	-1.58394	0.00506479	DP	L-scopolamine	GBP2|202748_at	-0.569835	0.0217029
NPY1R	0.929391	0.885143	0.975851	0.00325952	2.8446	0.032752	UP	L-scopolamine	NPY1R|205440_s_at	-0.945839	0.0150433
RPS14	0.780611	0.616312	0.988708	0.0399616	0.910178	0.0284209	UP	L-scopolamine	RPS14|208645_s_at	-0.551179	0.00987134
CCT2	1.27593	1.00278	1.62349	0.0474168	-0.530121	0.0395902	DR	L-scopolamine	CCT2|201946_s_at	1.41653	2.69437e-05
RASGRP1	0.897784	0.817382	0.986095	0.0242915	1.59482	0.0431577	UP	L-scopolamine	RASGRP1|205590_at	-1.52488	0.00229118
SCUBE2	0.945437	0.898299	0.995048	0.0315401	-1.15654	0.00740076	DP	L-scopolamine	SCUBE2|219197_s_at	0.695062	0.00517343
NDUFAF3	0.794521	0.631881	0.999023	0.0490307	-0.707824	0.0087317	DP	L-scopolamine	NDUFAF3|209177_at	0.554516	0.00508501
EGR3	0.887756	0.813796	0.968438	0.00730609	1.48483	0.0198331	UP	L-scopolamine	EGR3|206115_at	0.746404	0.0124731
SIAH2	0.759912	0.646104	0.893767	0.000910778	0.720591	0.0280097	UP	L-scopolamine	SIAH2|209339_at	1.09151	0.0037567
PCYT2	0.711332	0.564688	0.896059	0.00383174	-1.16089	0.00985985	DP	L-scopolamine	PCYT2|209577_at	0.850575	0.0279463
EIF4EBP1	1.16139	1.01819	1.32474	0.0258554	0.783759	0.0129625	UR	L-scopolamine	EIF4EBP1|221539_at	0.661755	0.0244476
SERPINA1	0.833568	0.762578	0.911167	6.11255e-05	1.83109	0.0415314	UP	L-scopolamine	SERPINA1|202833_s_at	1.0388	0.00127006
SERPINA1	0.833568	0.762578	0.911167	6.11255e-05	1.83109	0.0415314	UP	L-scopolamine	SERPINA1|211429_s_at	1.72194	0.00381335
LY6G5C	0.83682	0.705237	0.992954	0.041253	-0.882802	0.0172129	DP	L-scopolamine	LY6G5C|219860_at	0.699144	0.0455714
RGL3	0.911448	0.848142	0.97948	0.0115873	3.43248	0.000766773	UP	L-scopolamine	RGL3|215054_at	0.991472	0.0341756
ERCC1	0.668625	0.495232	0.902727	0.00858632	0.798187	0.036459	UP	Liquiritin	ERCC1|203720_s_at	0.593474	0.00849684
CYBA	0.856253	0.754196	0.972119	0.0165452	3.09865	0.00618658	UP	Liquiritin	CYBA|203028_s_at	0.655778	0.0274772
ATP6AP1	1.31326	1.0099	1.70775	0.0420083	-0.603343	0.0143174	DR	Liquiritin	ATP6AP1|207809_s_at	0.678504	0.00613061
HSP90AA1	1.45205	1.16126	1.81567	0.00107115	-0.837049	0.012135	DR	Liquiritin	HSP90AA1|210211_s_at	-0.644134	0.00790811
HSP90AA1	1.45205	1.16126	1.81567	0.00107115	-0.837049	0.012135	DR	Liquiritin	HSP90AA1|211968_s_at	0.951958	0.016115
HSP90AA1	1.45205	1.16126	1.81567	0.00107115	-0.837049	0.012135	DR	Liquiritin	HSP90AA1|214328_s_at	-0.69443	7.57616e-05
SQLE	1.17109	1.01247	1.35455	0.0334286	-1.23331	0.00275383	DR	Liquiritin	SQLE|213562_s_at	1.56732	0.0166957
CADM4	0.827547	0.714254	0.95881	0.0117384	1.13849	0.00103286	UP	Liquiritin	CADM4|214267_s_at	-4.18807	0.011293
TFPI2	0.863383	0.80825	0.922277	1.28211e-05	-2.19854	0.0243707	DP	Liquiritin	TFPI2|209278_s_at	-0.631359	0.00570241
SLC29A1	1.20735	1.00322	1.45301	0.0461587	-0.735411	0.0272013	DR	Liquiritin	SLC29A1|201802_at	0.694196	0.0179574
LIFR	0.851201	0.755113	0.959516	0.00838425	-0.619908	0.0155398	DP	Liquiritin	LIFR|205876_at	1.91293	0.0403039
SMAD5	1.3837	1.03898	1.84279	0.0263165	0.899666	9.29624e-05	UR	Liquiritin	SMAD5|205188_s_at	0.918156	0.00315615
RPL24	0.761286	0.593477	0.976545	0.031811	0.884703	0.0167652	UP	Liquiritin	RPL24|200013_at	-0.517474	0.00185217
IFT57	0.734906	0.573439	0.941837	0.0149593	0.737613	0.0222441	UP	Liquiritin	IFT57|218100_s_at	-0.712875	0.000431738
ROPN1B	0.926409	0.868646	0.988013	0.0199603	1.75644	0.0134835	UP	Liquiritin	ROPN1B|220425_x_at	-2.27958	0.0494017
NKTR	0.782871	0.613967	0.998241	0.0483634	-0.857731	0.029324	DP	Liquiritin	NKTR|215338_s_at	0.534443	0.0275544
GBP1	0.870173	0.779125	0.971861	0.0136581	1.76729	0.0118094	UP	Liquiritin	GBP1|202270_at	3.00108	0.0204094
RPS25	0.75896	0.603203	0.954935	0.0186008	0.755131	0.0341657	UP	Liquiritin	RPS25|200091_s_at	-0.529408	0.0100386
HSPH1	1.29343	1.05363	1.5878	0.0139213	-1.18808	0.00799231	DR	Liquiritin	HSPH1|208744_x_at	1.16605	0.0105241
RPL5	0.677671	0.529342	0.867563	0.00202079	0.595441	0.0299195	UP	Liquiritin	RPL5|210034_s_at	-0.642658	0.0033625
NFE2	0.837903	0.760061	0.923719	0.000378044	0.95057	0.0197538	UP	Liquiritin	NFE2|209930_s_at	2.83805	0.00886746
BTG1	0.729839	0.584047	0.912023	0.00560682	1.13706	0.0217191	UP	Liquiritin	BTG1|200921_s_at	-0.545829	0.0164394
CCNJL	0.886932	0.792788	0.992256	0.0361041	2.20658	8.20633e-05	UP	Liquiritin	CCNJL|219227_at	-0.543876	0.004246
HNRNPA1	0.637302	0.448911	0.904754	0.0117421	0.573658	0.0153167	UP	Liquiritin	HNRNPA1|200016_x_at	-0.536185	0.00671359
MICAL1	0.798048	0.663271	0.960212	0.0168416	-1.17499	0.000910863	DP	Liquiritin	MICAL1|218376_s_at	0.865294	0.00484318
CNPY3	0.743482	0.569517	0.970585	0.0292949	-0.5073	0.0165277	DP	Liquiritin	CNPY3|217931_at	0.65896	0.0078899
CYP1B1	0.884614	0.791722	0.988405	0.0303113	-0.793976	0.0081546	DP	Liquiritin	CYP1B1|202435_s_at	-0.516134	0.0269302
CYP1B1	0.884614	0.791722	0.988405	0.0303113	-0.793976	0.0081546	DP	Liquiritin	CYP1B1|202436_s_at	-0.581148	0.00388695
RPS11	0.712567	0.558205	0.909614	0.0065188	0.547105	0.0485921	UP	Liquiritin	RPS11|213350_at	-2.13703	0.00313806
NTRK2	0.902823	0.831126	0.980706	0.0154597	1.26225	0.00347418	UP	Liquiritin	NTRK2|207152_at	3.21536	0.0105842
PDCD4	0.809773	0.700083	0.93665	0.00449418	0.806707	0.0418405	UP	Liquiritin	PDCD4|202731_at	1.2843	0.0191596
ZFP36L2	0.83299	0.698995	0.99267	0.0411334	1.21225	0.00710625	UP	Liquiritin	ZFP36L2|201368_at	-0.665311	0.00319831
GBP2	0.786174	0.681481	0.90695	0.000968757	-1.58394	0.00506479	DP	Liquiritin	GBP2|202748_at	-0.510519	0.0187937
NPY1R	0.929391	0.885143	0.975851	0.00325952	2.8446	0.032752	UP	Liquiritin	NPY1R|205440_s_at	-0.725745	0.000741919
RPS14	0.780611	0.616312	0.988708	0.0399616	0.910178	0.0284209	UP	Liquiritin	RPS14|208645_s_at	-0.543226	0.00731077
CCT2	1.27593	1.00278	1.62349	0.0474168	-0.530121	0.0395902	DR	Liquiritin	CCT2|201946_s_at	1.3762	9.45058e-08
RASGRP1	0.897784	0.817382	0.986095	0.0242915	1.59482	0.0431577	UP	Liquiritin	RASGRP1|205590_at	-1.97618	0.00293905
PSMD1	1.57189	1.08944	2.26799	0.015608	-0.720859	0.0182201	DR	Liquiritin	PSMD1|201199_s_at	-0.502876	0.0179839
SCUBE2	0.945437	0.898299	0.995048	0.0315401	-1.15654	0.00740076	DP	Liquiritin	SCUBE2|219197_s_at	0.71709	0.00377709
NDUFAF3	0.794521	0.631881	0.999023	0.0490307	-0.707824	0.0087317	DP	Liquiritin	NDUFAF3|209177_at	0.537778	0.00842023
EGR3	0.887756	0.813796	0.968438	0.00730609	1.48483	0.0198331	UP	Liquiritin	EGR3|206115_at	0.73925	0.0137865
SGSH	0.692637	0.513894	0.93355	0.0158886	-0.638242	0.00192707	DP	Liquiritin	SGSH|35626_at	-0.537374	0.00534128
SIAH2	0.759912	0.646104	0.893767	0.000910778	0.720591	0.0280097	UP	Liquiritin	SIAH2|209339_at	1.1001	0.008527
IFITM1	0.887122	0.790355	0.995736	0.0421059	1.82296	0.00450551	UP	Liquiritin	IFITM1|214022_s_at	-0.579748	0.00190497
EIF4EBP1	1.16139	1.01819	1.32474	0.0258554	0.783759	0.0129625	UR	Liquiritin	EIF4EBP1|221539_at	0.646828	0.0377638
CACNA1H	1.11228	1.03596	1.19422	0.0033459	0.722256	0.0129306	UR	Liquiritin	CACNA1H|205845_at	1.93827	0.0132808
SERPINA1	0.833568	0.762578	0.911167	6.11255e-05	1.83109	0.0415314	UP	Liquiritin	SERPINA1|202833_s_at	0.710077	0.0119402
SERPINA1	0.833568	0.762578	0.911167	6.11255e-05	1.83109	0.0415314	UP	Liquiritin	SERPINA1|211428_at	3.15042	0.0176279
SERPINA1	0.833568	0.762578	0.911167	6.11255e-05	1.83109	0.0415314	UP	Liquiritin	SERPINA1|211429_s_at	1.34922	0.0258665
LY6G5C	0.83682	0.705237	0.992954	0.041253	-0.882802	0.0172129	DP	Liquiritin	LY6G5C|219860_at	0.671063	0.0478297
MICB	0.867332	0.760993	0.988531	0.0329394	-2.30236	0.00351529	DP	Liquiritin	MICB|206247_at	0.721947	0.0309126
AMPH	0.906719	0.831365	0.988902	0.0269614	-4.06597	0.000516736	DP	Gamabufatalin	AMPH|205257_s_at	-1.30955	0.0119839
BACH2	0.889732	0.792249	0.999208	0.0484571	1.56354	0.00420312	UP	Gamabufatalin	BACH2|221234_s_at	-0.779482	0.0226553
LIFR	0.851201	0.755113	0.959516	0.00838425	-0.619908	0.0155398	DP	Gamabufatalin	LIFR|205876_at	1.76631	0.0431901
RPL5	0.677671	0.529342	0.867563	0.00202079	0.595441	0.0299195	UP	Gamabufatalin	RPL5|210034_s_at	-0.564714	2.39822e-05
STAT5A	0.806238	0.674271	0.964033	0.018196	0.731619	0.0243399	UP	Gamabufatalin	STAT5A|203010_at	2.18041	0.00329623
BST2	0.902419	0.815255	0.998902	0.0475742	1.43158	0.00292765	UP	Gamabufatalin	BST2|201641_at	0.587586	0.0225414
PTPN22	0.887953	0.794392	0.992533	0.036448	-0.765346	0.00689782	DP	Gamabufatalin	PTPN22|208010_s_at	-1.03623	0.0458003
CYP1B1	0.884614	0.791722	0.988405	0.0303113	-0.793976	0.0081546	DP	Gamabufatalin	CYP1B1|202434_s_at	-0.893074	0.0129201
NCOA2	1.15172	1.016	1.30557	0.0272385	-0.617842	0.0139082	DR	Gamabufatalin	NCOA2|215605_at	0.599014	0.047445
NTRK2	0.902823	0.831126	0.980706	0.0154597	1.26225	0.00347418	UP	Gamabufatalin	NTRK2|207152_at	2.86627	0.0150228
PAK1	0.778242	0.632695	0.957271	0.0176278	1.44611	0.0053251	UP	Gamabufatalin	PAK1|209615_s_at	0.579809	0.0332018
C1R	0.867701	0.75349	0.999223	0.0487509	2.11697	0.01718	UP	Gamabufatalin	C1R|212067_s_at	-1.76246	0.0430727
STK17A	0.720604	0.565252	0.918653	0.00817336	-0.517328	0.0315696	DP	Gamabufatalin	STK17A|202694_at	0.826348	0.0187469
ATF5	0.791604	0.628565	0.996931	0.0470238	-0.61731	0.00214719	DP	Gamabufatalin	ATF5|204999_s_at	0.571422	0.00879218
EGR3	0.887756	0.813796	0.968438	0.00730609	1.48483	0.0198331	UP	Gamabufatalin	EGR3|206115_at	0.546803	0.0303094
IFITM1	0.887122	0.790355	0.995736	0.0421059	1.82296	0.00450551	UP	Gamabufatalin	IFITM1|201601_x_at	0.584136	0.0220518
IFITM1	0.887122	0.790355	0.995736	0.0421059	1.82296	0.00450551	UP	Gamabufatalin	IFITM1|214022_s_at	0.691492	0.00810278
CYP24A1	0.868571	0.79927	0.943881	0.000895906	4.50911	0.00626847	UP	Ursodeoxycholic acid	CYP24A1|206504_at	1.19081	0.00890508
IL17RB	0.869437	0.762472	0.991408	0.0367268	-0.814825	0.0268579	DP	Ursodeoxycholic acid	IL17RB|219255_x_at	-0.623335	0.028618
ACAA1	0.739187	0.581464	0.939692	0.013589	-0.813662	0.000219263	DP	Ursodeoxycholic acid	ACAA1|202025_x_at	0.607037	0.0345832
SYT1	0.935468	0.883442	0.990557	0.0223158	0.702441	0.0227156	UP	Ursodeoxycholic acid	SYT1|203998_s_at	0.610531	0.0382782
IFI35	0.843555	0.72589	0.980293	0.0264428	0.895068	0.0231157	UP	Ursodeoxycholic acid	IFI35|209417_s_at	-1.47463	0.00988625
HSP90AA1	1.45205	1.16126	1.81567	0.00107115	-0.837049	0.012135	DR	Ursodeoxycholic acid	HSP90AA1|211968_s_at	0.845055	0.0111279
SQLE	1.17109	1.01247	1.35455	0.0334286	-1.23331	0.00275383	DR	Ursodeoxycholic acid	SQLE|213577_at	0.916064	0.00797576
CADM4	0.827547	0.714254	0.95881	0.0117384	1.13849	0.00103286	UP	Ursodeoxycholic acid	CADM4|214267_s_at	-3.84006	0.0133266
TFPI2	0.863383	0.80825	0.922277	1.28211e-05	-2.19854	0.0243707	DP	Ursodeoxycholic acid	TFPI2|209278_s_at	1.01414	0.0225208
LIFR	0.851201	0.755113	0.959516	0.00838425	-0.619908	0.0155398	DP	Ursodeoxycholic acid	LIFR|205876_at	1.68751	0.0426525
SMAD5	1.3837	1.03898	1.84279	0.0263165	0.899666	9.29624e-05	UR	Ursodeoxycholic acid	SMAD5|205188_s_at	1.64398	0.00114562
IFT57	0.734906	0.573439	0.941837	0.0149593	0.737613	0.0222441	UP	Ursodeoxycholic acid	IFT57|218100_s_at	0.677808	0.000663008
NKTR	0.782871	0.613967	0.998241	0.0483634	-0.857731	0.029324	DP	Ursodeoxycholic acid	NKTR|215338_s_at	0.790153	0.0253893
GBP1	0.870173	0.779125	0.971861	0.0136581	1.76729	0.0118094	UP	Ursodeoxycholic acid	GBP1|202270_at	2.71533	0.0243155
HSPH1	1.29343	1.05363	1.5878	0.0139213	-1.18808	0.00799231	DR	Ursodeoxycholic acid	HSPH1|206976_s_at	-0.591742	0.0143757
HSPH1	1.29343	1.05363	1.5878	0.0139213	-1.18808	0.00799231	DR	Ursodeoxycholic acid	HSPH1|208744_x_at	1.4931	0.0123213
NFE2	0.837903	0.760061	0.923719	0.000378044	0.95057	0.0197538	UP	Ursodeoxycholic acid	NFE2|209930_s_at	3.20173	0.0456952
SGCE	0.883745	0.789227	0.989583	0.0322412	1.64272	0.00510119	UP	Ursodeoxycholic acid	SGCE|204688_at	0.524293	0.0289272
UBE2G1	1.57464	1.09372	2.26703	0.0146158	0.653258	0.000629595	UR	Ursodeoxycholic acid	UBE2G1|209142_s_at	-0.513822	0.00635328
MKRN1	0.627527	0.413044	0.953386	0.0289867	0.694995	0.00691524	UP	Ursodeoxycholic acid	MKRN1|209845_at	-0.536576	0.00748762
HNRNPA1	0.637302	0.448911	0.904754	0.0117421	0.573658	0.0153167	UP	Ursodeoxycholic acid	HNRNPA1|221919_at	-0.607601	0.031136
CYP1B1	0.884614	0.791722	0.988405	0.0303113	-0.793976	0.0081546	DP	Ursodeoxycholic acid	CYP1B1|202434_s_at	2.25679	0.00595873
SLC39A8	0.836641	0.721053	0.970758	0.0187137	-1.11532	0.0210013	DP	Ursodeoxycholic acid	SLC39A8|209267_s_at	0.997193	0.00134493
OSBPL1A	0.759189	0.624002	0.923664	0.00589396	-1.06865	0.00331599	DP	Ursodeoxycholic acid	OSBPL1A|209485_s_at	-0.539348	0.00258061
PMAIP1	0.851132	0.758668	0.954864	0.00601239	1.99112	0.0240982	UP	Ursodeoxycholic acid	PMAIP1|204285_s_at	-0.534248	0.0475371
PMAIP1	0.851132	0.758668	0.954864	0.00601239	1.99112	0.0240982	UP	Ursodeoxycholic acid	PMAIP1|204286_s_at	-0.967703	0.0178944
NTRK2	0.902823	0.831126	0.980706	0.0154597	1.26225	0.00347418	UP	Ursodeoxycholic acid	NTRK2|207152_at	2.82422	0.0196577
TMPRSS3	0.94109	0.887447	0.997975	0.0425951	0.869182	0.00604686	UP	Ursodeoxycholic acid	TMPRSS3|220177_s_at	-0.993517	0.000747998
STK17A	0.720604	0.565252	0.918653	0.00817336	-0.517328	0.0315696	DP	Ursodeoxycholic acid	STK17A|202694_at	1.10777	0.00814059
AZU1	0.9162	0.839788	0.999564	0.048864	0.835229	0.0284523	UP	Ursodeoxycholic acid	AZU1|214575_s_at	3.64955	0.0122216
RASGRP1	0.897784	0.817382	0.986095	0.0242915	1.59482	0.0431577	UP	Ursodeoxycholic acid	RASGRP1|205590_at	0.723583	0.0316523
PSMD2	1.45668	1.08228	1.9606	0.0130788	-0.572307	0.0132295	DR	Ursodeoxycholic acid	PSMD2|200830_at	0.570992	0.00294145
SCUBE2	0.945437	0.898299	0.995048	0.0315401	-1.15654	0.00740076	DP	Ursodeoxycholic acid	SCUBE2|219197_s_at	0.504637	0.0044764
EIF3F	0.685702	0.502515	0.935667	0.0173467	0.50653	0.0236911	UP	Ursodeoxycholic acid	EIF3F|200865_at	-2.55541	0.0413122
EGR3	0.887756	0.813796	0.968438	0.00730609	1.48483	0.0198331	UP	Ursodeoxycholic acid	EGR3|206115_at	-0.964023	0.0421506
UBA7	0.756256	0.645348	0.886224	0.000554958	0.903451	0.00232153	UP	Ursodeoxycholic acid	UBA7|1294_at	-2.59633	0.0334809
TNFAIP2	0.849121	0.730359	0.987194	0.0333676	1.92497	0.00253009	UP	Ursodeoxycholic acid	TNFAIP2|202510_s_at	-1.18325	0.0253847
IFITM1	0.887122	0.790355	0.995736	0.0421059	1.82296	0.00450551	UP	Ursodeoxycholic acid	IFITM1|201601_x_at	-0.826305	0.00617189
IFITM1	0.887122	0.790355	0.995736	0.0421059	1.82296	0.00450551	UP	Ursodeoxycholic acid	IFITM1|214022_s_at	-1.24617	0.0147553
WWOX	1.25767	1.09301	1.44713	0.00136392	1.17696	0.009425	UR	Ursodeoxycholic acid	WWOX|210695_s_at	1.01046	0.00295072
WWOX	1.25767	1.09301	1.44713	0.00136392	1.17696	0.009425	UR	Ursodeoxycholic acid	WWOX|219077_s_at	1.53518	0.00930791
SERPINA1	0.833568	0.762578	0.911167	6.11255e-05	1.83109	0.0415314	UP	Ursodeoxycholic acid	SERPINA1|202833_s_at	-4.82649	0.00354662
SERPINA1	0.833568	0.762578	0.911167	6.11255e-05	1.83109	0.0415314	UP	Ursodeoxycholic acid	SERPINA1|211429_s_at	-0.836395	0.0183504
APOM	0.841745	0.728689	0.972342	0.0192265	0.968185	0.0210961	UP	Ursodeoxycholic acid	APOM|205682_x_at	0.822769	0.022948
ZNF345	0.694723	0.543148	0.888599	0.00372593	0.646037	0.0134328	UP	Ursodeoxycholic acid	ZNF345|207236_at	1.41622	0.0486636
CHMP4A	0.661593	0.516539	0.84738	0.00107012	-0.687267	0.00761658	DP	Ursodeoxycholic acid	CHMP4A|218571_s_at	-0.502021	0.00740601
AASS	0.846134	0.734907	0.974195	0.0201496	0.582156	0.0178771	UP	Ginsenoside Rb2	AASS|210852_s_at	-3.13393	0.0380722
PEX3	1.38991	1.0576	1.82663	0.0181907	-0.663254	0.0311167	DR	Ginsenoside Rb2	PEX3|203970_s_at	0.550629	0.000263456
SYT1	0.935468	0.883442	0.990557	0.0223158	0.702441	0.0227156	UP	Ginsenoside Rb2	SYT1|203998_s_at	0.730266	0.0232653
HSP90AA1	1.45205	1.16126	1.81567	0.00107115	-0.837049	0.012135	DR	Ginsenoside Rb2	HSP90AA1|210211_s_at	-0.630762	0.0031125
HSP90AA1	1.45205	1.16126	1.81567	0.00107115	-0.837049	0.012135	DR	Ginsenoside Rb2	HSP90AA1|211968_s_at	0.895702	0.0106897
HSP90AA1	1.45205	1.16126	1.81567	0.00107115	-0.837049	0.012135	DR	Ginsenoside Rb2	HSP90AA1|214328_s_at	-0.591216	0.00337387
RPGRIP1	0.844091	0.719107	0.990797	0.038168	-1.21953	0.0109196	DP	Ginsenoside Rb2	RPGRIP1|206608_s_at	0.792687	0.023649
SQLE	1.17109	1.01247	1.35455	0.0334286	-1.23331	0.00275383	DR	Ginsenoside Rb2	SQLE|213577_at	0.619501	0.0116722
TFPI2	0.863383	0.80825	0.922277	1.28211e-05	-2.19854	0.0243707	DP	Ginsenoside Rb2	TFPI2|209278_s_at	1.17843	0.0111526
B9D1	0.814768	0.681996	0.973389	0.023999	0.871076	0.00170412	UP	Ginsenoside Rb2	B9D1|210535_at	0.628863	0.0194903
GPLD1	0.884538	0.786603	0.994666	0.0404339	0.842386	0.00994592	UP	Ginsenoside Rb2	GPLD1|215554_at	-0.816084	0.0315737
SMAD5	1.3837	1.03898	1.84279	0.0263165	0.899666	9.29624e-05	UR	Ginsenoside Rb2	SMAD5|205188_s_at	1.01254	0.0196729
NKTR	0.782871	0.613967	0.998241	0.0483634	-0.857731	0.029324	DP	Ginsenoside Rb2	NKTR|215338_s_at	0.784964	0.0120991
GBP1	0.870173	0.779125	0.971861	0.0136581	1.76729	0.0118094	UP	Ginsenoside Rb2	GBP1|202270_at	3.42302	0.0151864
RPS25	0.75896	0.603203	0.954935	0.0186008	0.755131	0.0341657	UP	Ginsenoside Rb2	RPS25|200091_s_at	-0.556243	0.00491922
HSPH1	1.29343	1.05363	1.5878	0.0139213	-1.18808	0.00799231	DR	Ginsenoside Rb2	HSPH1|206976_s_at	-0.54657	0.00170337
HSPH1	1.29343	1.05363	1.5878	0.0139213	-1.18808	0.00799231	DR	Ginsenoside Rb2	HSPH1|208744_x_at	1.57556	0.0189527
RPL5	0.677671	0.529342	0.867563	0.00202079	0.595441	0.0299195	UP	Ginsenoside Rb2	RPL5|210034_s_at	-0.511027	0.0145021
RPL5	0.677671	0.529342	0.867563	0.00202079	0.595441	0.0299195	UP	Ginsenoside Rb2	RPL5|213080_x_at	-0.622383	8.94122e-05
SGCE	0.883745	0.789227	0.989583	0.0322412	1.64272	0.00510119	UP	Ginsenoside Rb2	SGCE|204688_at	0.703385	0.0299563
APOL2	0.776288	0.633337	0.951505	0.0147406	-0.69624	0.0135996	DP	Ginsenoside Rb2	APOL2|221653_x_at	-2.38225	0.0407375
CDKN1C	0.85026	0.741928	0.974409	0.0196601	2.51059	0.00922802	UP	Ginsenoside Rb2	CDKN1C|216894_x_at	-2.58503	0.0192956
BST2	0.902419	0.815255	0.998902	0.0475742	1.43158	0.00292765	UP	Ginsenoside Rb2	BST2|201641_at	-1.6861	0.0151181
MKRN1	0.627527	0.413044	0.953386	0.0289867	0.694995	0.00691524	UP	Ginsenoside Rb2	MKRN1|209845_at	-0.501278	0.026587
HNRNPA1	0.637302	0.448911	0.904754	0.0117421	0.573658	0.0153167	UP	Ginsenoside Rb2	HNRNPA1|222040_at	0.732838	0.0304673
BLK	0.899584	0.831928	0.972741	0.00798361	2.5648	0.000809085	UP	Ginsenoside Rb2	BLK|206255_at	-1.12732	0.0382936
RDX	1.24084	1.0063	1.53003	0.0435123	2.1846	0.00762614	UR	Ginsenoside Rb2	RDX|212398_at	1.09085	0.0175699
SLC39A8	0.836641	0.721053	0.970758	0.0187137	-1.11532	0.0210013	DP	Ginsenoside Rb2	SLC39A8|209267_s_at	1.13484	0.00103012
OSBPL1A	0.759189	0.624002	0.923664	0.00589396	-1.06865	0.00331599	DP	Ginsenoside Rb2	OSBPL1A|209485_s_at	-0.556356	0.00739612
PMAIP1	0.851132	0.758668	0.954864	0.00601239	1.99112	0.0240982	UP	Ginsenoside Rb2	PMAIP1|204286_s_at	-0.786453	0.0361773
RPS11	0.712567	0.558205	0.909614	0.0065188	0.547105	0.0485921	UP	Ginsenoside Rb2	RPS11|213350_at	-0.547764	0.0390566
OSBPL10	1.26436	1.02556	1.55877	0.0280704	-0.579902	0.0010835	DR	Ginsenoside Rb2	OSBPL10|216755_at	-0.798554	0.00297025
PLAC8	0.87431	0.802924	0.952043	0.00199588	-0.927298	0.0425076	DP	Ginsenoside Rb2	PLAC8|219014_at	0.5424	0.0305697
TNFAIP8	0.793556	0.658078	0.956926	0.0154803	1.1739	0.00583217	UP	Ginsenoside Rb2	TNFAIP8|208296_x_at	0.839161	0.0083971
NTRK2	0.902823	0.831126	0.980706	0.0154597	1.26225	0.00347418	UP	Ginsenoside Rb2	NTRK2|207152_at	3.28632	0.00209108
C11orf49	0.750902	0.58503	0.963803	0.0244836	0.741324	0.00532389	UP	Ginsenoside Rb2	C11orf49|203257_s_at	-0.610232	0.00428344
PDCD4	0.809773	0.700083	0.93665	0.00449418	0.806707	0.0418405	UP	Ginsenoside Rb2	PDCD4|202730_s_at	-1.01262	0.0259924
ACSL1	1.14576	1.00279	1.30912	0.0454038	0.692807	0.0392709	UR	Ginsenoside Rb2	ACSL1|201963_at	0.676291	0.0282302
LSS	1.27938	1.01217	1.61715	0.0392893	-0.801765	0.00818827	DR	Ginsenoside Rb2	LSS|211019_s_at	-1.08593	0.0281694
NPY1R	0.929391	0.885143	0.975851	0.00325952	2.8446	0.032752	UP	Ginsenoside Rb2	NPY1R|205440_s_at	0.806989	0.00125159
STK17A	0.720604	0.565252	0.918653	0.00817336	-0.517328	0.0315696	DP	Ginsenoside Rb2	STK17A|202694_at	1.46961	0.0078467
ATF5	0.791604	0.628565	0.996931	0.0470238	-0.61731	0.00214719	DP	Ginsenoside Rb2	ATF5|204999_s_at	0.88584	0.0207495
RASGRP1	0.897784	0.817382	0.986095	0.0242915	1.59482	0.0431577	UP	Ginsenoside Rb2	RASGRP1|205590_at	0.752626	0.0168018
PSMD2	1.45668	1.08228	1.9606	0.0130788	-0.572307	0.0132295	DR	Ginsenoside Rb2	PSMD2|200830_at	0.667376	0.0142947
EIF3F	0.685702	0.502515	0.935667	0.0173467	0.50653	0.0236911	UP	Ginsenoside Rb2	EIF3F|200865_at	-2.92419	0.0138471
NDUFAF3	0.794521	0.631881	0.999023	0.0490307	-0.707824	0.0087317	DP	Ginsenoside Rb2	NDUFAF3|209177_at	-0.540112	0.00606467
DTX3	0.778381	0.643912	0.94093	0.00962017	0.61891	0.0301964	UP	Ginsenoside Rb2	DTX3|222022_at	-2.6025	0.0458528
EGR3	0.887756	0.813796	0.968438	0.00730609	1.48483	0.0198331	UP	Ginsenoside Rb2	EGR3|206115_at	-0.685781	0.0147472
IFITM1	0.887122	0.790355	0.995736	0.0421059	1.82296	0.00450551	UP	Ginsenoside Rb2	IFITM1|201601_x_at	-0.698374	0.0253636
IFITM1	0.887122	0.790355	0.995736	0.0421059	1.82296	0.00450551	UP	Ginsenoside Rb2	IFITM1|214022_s_at	-1.69926	0.0335823
WWOX	1.25767	1.09301	1.44713	0.00136392	1.17696	0.009425	UR	Ginsenoside Rb2	WWOX|210695_s_at	0.863969	0.00309169
WWOX	1.25767	1.09301	1.44713	0.00136392	1.17696	0.009425	UR	Ginsenoside Rb2	WWOX|219077_s_at	1.51817	0.0103298
SIRT7	0.742337	0.581829	0.947124	0.0165297	-0.55638	0.0352673	DP	Ginsenoside Rb2	SIRT7|218797_s_at	-0.586395	0.00135205
SERPINA1	0.833568	0.762578	0.911167	6.11255e-05	1.83109	0.0415314	UP	Ginsenoside Rb2	SERPINA1|202833_s_at	-4.33191	0.0138335
APOM	0.841745	0.728689	0.972342	0.0192265	0.968185	0.0210961	UP	Ginsenoside Rb2	APOM|205682_x_at	0.731481	0.0293029
MICB	0.867332	0.760993	0.988531	0.0329394	-2.30236	0.00351529	DP	Ginsenoside Rb2	MICB|206247_at	0.827062	0.0399081
RGL3	0.911448	0.848142	0.97948	0.0115873	3.43248	0.000766773	UP	Ginsenoside Rb2	RGL3|215054_at	1.12348	0.0301906
ZNF345	0.694723	0.543148	0.888599	0.00372593	0.646037	0.0134328	UP	Ginsenoside Rb2	ZNF345|207236_at	1.80786	0.0309669
CHMP4A	0.661593	0.516539	0.84738	0.00107012	-0.687267	0.00761658	DP	Ginsenoside Rb2	CHMP4A|218572_at	-0.520308	0.00170958
ERCC1	0.668625	0.495232	0.902727	0.00858632	0.798187	0.036459	UP	Aconitine	ERCC1|203720_s_at	0.572451	0.0162156
TRAF1	0.800699	0.69158	0.927034	0.00294374	1.69095	0.00982732	UP	Aconitine	TRAF1|205599_at	-1.2828	0.0112612
SYT1	0.935468	0.883442	0.990557	0.0223158	0.702441	0.0227156	UP	Aconitine	SYT1|203998_s_at	0.754291	0.0184279
ATP6AP1	1.31326	1.0099	1.70775	0.0420083	-0.603343	0.0143174	DR	Aconitine	ATP6AP1|207809_s_at	0.653366	0.00761906
HSP90AA1	1.45205	1.16126	1.81567	0.00107115	-0.837049	0.012135	DR	Aconitine	HSP90AA1|210211_s_at	-0.526092	0.00301534
HSP90AA1	1.45205	1.16126	1.81567	0.00107115	-0.837049	0.012135	DR	Aconitine	HSP90AA1|214328_s_at	-0.561245	0.000400898
FLT3LG	0.818164	0.707507	0.946129	0.00679233	1.28055	0.000502653	UP	Aconitine	FLT3LG|206980_s_at	-1.12744	0.0208728
RPGRIP1	0.844091	0.719107	0.990797	0.038168	-1.21953	0.0109196	DP	Aconitine	RPGRIP1|206608_s_at	1.12597	0.0119346
ATG4A	1.7216	1.24298	2.38452	0.00108041	-0.659957	0.0306252	DR	Aconitine	ATG4A|213115_at	-0.63828	0.0170307
SQLE	1.17109	1.01247	1.35455	0.0334286	-1.23331	0.00275383	DR	Aconitine	SQLE|213562_s_at	1.11088	0.0311115
SQLE	1.17109	1.01247	1.35455	0.0334286	-1.23331	0.00275383	DR	Aconitine	SQLE|213577_at	0.679929	0.0492983
TFPI2	0.863383	0.80825	0.922277	1.28211e-05	-2.19854	0.0243707	DP	Aconitine	TFPI2|209278_s_at	0.832156	0.016243
B9D1	0.814768	0.681996	0.973389	0.023999	0.871076	0.00170412	UP	Aconitine	B9D1|205662_at	0.618539	0.0476394
B9D1	0.814768	0.681996	0.973389	0.023999	0.871076	0.00170412	UP	Aconitine	B9D1|210534_s_at	0.619972	0.00468433
SMAD5	1.3837	1.03898	1.84279	0.0263165	0.899666	9.29624e-05	UR	Aconitine	SMAD5|205187_at	1.12368	0.00317359
SMAD5	1.3837	1.03898	1.84279	0.0263165	0.899666	9.29624e-05	UR	Aconitine	SMAD5|205188_s_at	1.69181	0.0133772
NKTR	0.782871	0.613967	0.998241	0.0483634	-0.857731	0.029324	DP	Aconitine	NKTR|215338_s_at	0.761275	0.0118248
HSPH1	1.29343	1.05363	1.5878	0.0139213	-1.18808	0.00799231	DR	Aconitine	HSPH1|206976_s_at	-0.598976	0.0031105
HSPH1	1.29343	1.05363	1.5878	0.0139213	-1.18808	0.00799231	DR	Aconitine	HSPH1|208744_x_at	1.20311	0.0154586
STAT5A	0.806238	0.674271	0.964033	0.018196	0.731619	0.0243399	UP	Aconitine	STAT5A|203010_at	1.35568	0.0359932
BST2	0.902419	0.815255	0.998902	0.0475742	1.43158	0.00292765	UP	Aconitine	BST2|201641_at	-2.62082	0.0221285
CCNA1	0.847772	0.765215	0.939235	0.00158196	1.18635	0.019463	UP	Aconitine	CCNA1|205899_at	3.00105	0.00977425
HNRNPA1	0.637302	0.448911	0.904754	0.0117421	0.573658	0.0153167	UP	Aconitine	HNRNPA1|222040_at	1.06424	0.0217037
REPS1	1.55073	1.16259	2.06846	0.00283656	-0.580046	0.0092244	DR	Aconitine	REPS1|215201_at	-1.65149	0.0365344
RDX	1.24084	1.0063	1.53003	0.0435123	2.1846	0.00762614	UR	Aconitine	RDX|204969_s_at	0.728838	0.00986043
RDX	1.24084	1.0063	1.53003	0.0435123	2.1846	0.00762614	UR	Aconitine	RDX|212398_at	1.07254	0.0134476
CYP1B1	0.884614	0.791722	0.988405	0.0303113	-0.793976	0.0081546	DP	Aconitine	CYP1B1|202434_s_at	-0.77154	0.0305689
SLC39A8	0.836641	0.721053	0.970758	0.0187137	-1.11532	0.0210013	DP	Aconitine	SLC39A8|209267_s_at	0.641237	0.00455633
PMAIP1	0.851132	0.758668	0.954864	0.00601239	1.99112	0.0240982	UP	Aconitine	PMAIP1|204286_s_at	-0.605022	0.0492338
RPS11	0.712567	0.558205	0.909614	0.0065188	0.547105	0.0485921	UP	Aconitine	RPS11|213350_at	-2.91065	0.00598825
RFX5	0.742611	0.560088	0.984615	0.038669	0.96646	0.00638029	UP	Aconitine	RFX5|202963_at	0.512965	0.048584
NTRK2	0.902823	0.831126	0.980706	0.0154597	1.26225	0.00347418	UP	Aconitine	NTRK2|207152_at	2.93756	0.0101863
ZFP36L2	0.83299	0.698995	0.99267	0.0411334	1.21225	0.00710625	UP	Aconitine	ZFP36L2|201367_s_at	3.64638	0.0378366
STK17A	0.720604	0.565252	0.918653	0.00817336	-0.517328	0.0315696	DP	Aconitine	STK17A|202694_at	0.927641	0.0264309
CCT2	1.27593	1.00278	1.62349	0.0474168	-0.530121	0.0395902	DR	Aconitine	CCT2|201946_s_at	1.03891	0.000726822
ATF5	0.791604	0.628565	0.996931	0.0470238	-0.61731	0.00214719	DP	Aconitine	ATF5|204999_s_at	1.04687	0.00349198
AZU1	0.9162	0.839788	0.999564	0.048864	0.835229	0.0284523	UP	Aconitine	AZU1|214575_s_at	2.73966	0.0177813
RASGRP1	0.897784	0.817382	0.986095	0.0242915	1.59482	0.0431577	UP	Aconitine	RASGRP1|205590_at	0.593215	0.0254272
TP53I11	1.31094	1.04761	1.64047	0.0179584	0.623038	0.0143908	UR	Aconitine	TP53I11|203421_at	0.944757	0.0261039
SCUBE2	0.945437	0.898299	0.995048	0.0315401	-1.15654	0.00740076	DP	Aconitine	SCUBE2|219197_s_at	0.568682	0.00369326
DTX3	0.778381	0.643912	0.94093	0.00962017	0.61891	0.0301964	UP	Aconitine	DTX3|49051_g_at	-3.11843	0.00331281
EGR3	0.887756	0.813796	0.968438	0.00730609	1.48483	0.0198331	UP	Aconitine	EGR3|206115_at	0.592091	0.0280413
SIAH2	0.759912	0.646104	0.893767	0.000910778	0.720591	0.0280097	UP	Aconitine	SIAH2|209339_at	0.822817	0.0183418
JRKL	1.20983	1.03499	1.41421	0.0167678	1.06378	0.00534918	UR	Aconitine	JRKL|206734_at	-0.587477	0.00816539
WWOX	1.25767	1.09301	1.44713	0.00136392	1.17696	0.009425	UR	Aconitine	WWOX|210695_s_at	0.703421	0.0040037
MST1P2	0.891528	0.796883	0.997415	0.0449446	0.69918	0.0239207	UP	Aconitine	MST1P2|213380_x_at	0.84751	0.0265399
SERPINA1	0.833568	0.762578	0.911167	6.11255e-05	1.83109	0.0415314	UP	Aconitine	SERPINA1|211429_s_at	1.17833	0.0201268
RABGAP1	1.56255	1.09185	2.23618	0.0146684	0.658677	0.00365847	UR	Macrozamin	RABGAP1|204028_s_at	-0.830484	0.03197
ERCC1	0.668625	0.495232	0.902727	0.00858632	0.798187	0.036459	UP	Macrozamin	ERCC1|203720_s_at	0.602548	0.016292
TRAF1	0.800699	0.69158	0.927034	0.00294374	1.69095	0.00982732	UP	Macrozamin	TRAF1|205599_at	-1.39029	0.00938858
RASGRP2	0.90381	0.817214	0.999582	0.0490565	1.74272	0.000176205	UP	Macrozamin	RASGRP2|208206_s_at	-0.905734	0.0106947
ATP6AP1	1.31326	1.0099	1.70775	0.0420083	-0.603343	0.0143174	DR	Macrozamin	ATP6AP1|207809_s_at	0.724359	0.00489291
HSP90AA1	1.45205	1.16126	1.81567	0.00107115	-0.837049	0.012135	DR	Macrozamin	HSP90AA1|211968_s_at	1.01937	0.00778135
ATG4A	1.7216	1.24298	2.38452	0.00108041	-0.659957	0.0306252	DR	Macrozamin	ATG4A|213115_at	-0.576792	0.0177092
SQLE	1.17109	1.01247	1.35455	0.0334286	-1.23331	0.00275383	DR	Macrozamin	SQLE|213562_s_at	1.84359	0.0126925
TFPI2	0.863383	0.80825	0.922277	1.28211e-05	-2.19854	0.0243707	DP	Macrozamin	TFPI2|209278_s_at	-1.44531	0.0004623
ALDH3A1	0.848685	0.766883	0.939213	0.00151031	2.20909	0.0112622	UP	Macrozamin	ALDH3A1|205623_at	-3.42729	0.0427671
GPLD1	0.884538	0.786603	0.994666	0.0404339	0.842386	0.00994592	UP	Macrozamin	GPLD1|215554_at	-1.58828	0.0288133
LIFR	0.851201	0.755113	0.959516	0.00838425	-0.619908	0.0155398	DP	Macrozamin	LIFR|205876_at	1.76884	0.00571809
IFT57	0.734906	0.573439	0.941837	0.0149593	0.737613	0.0222441	UP	Macrozamin	IFT57|218100_s_at	-0.706489	0.0137195
NFE2	0.837903	0.760061	0.923719	0.000378044	0.95057	0.0197538	UP	Macrozamin	NFE2|209930_s_at	1.93977	0.0404353
STAT5A	0.806238	0.674271	0.964033	0.018196	0.731619	0.0243399	UP	Macrozamin	STAT5A|203010_at	1.81976	0.0139348
BST2	0.902419	0.815255	0.998902	0.0475742	1.43158	0.00292765	UP	Macrozamin	BST2|201641_at	-1.56558	0.00214452
RAP1GAP2	1.19803	1.0307	1.39253	0.0185795	0.650543	0.00448637	UR	Macrozamin	RAP1GAP2|213280_at	-0.658136	0.0392404
CCNJL	0.886932	0.792788	0.992256	0.0361041	2.20658	8.20633e-05	UP	Macrozamin	CCNJL|219227_at	-0.639833	0.00518525
HNRNPA1	0.637302	0.448911	0.904754	0.0117421	0.573658	0.0153167	UP	Macrozamin	HNRNPA1|221919_at	1.15323	0.000794453
CNPY3	0.743482	0.569517	0.970585	0.0292949	-0.5073	0.0165277	DP	Macrozamin	CNPY3|217931_at	0.962814	0.00189345
RDX	1.24084	1.0063	1.53003	0.0435123	2.1846	0.00762614	UR	Macrozamin	RDX|212397_at	-0.547517	0.00449949
[truncated: 2,528 more rows]
