# Supplementary material for: In Silico Evaluation of Natural Compounds for an Acidic Extracellular Environment in Human Breast Cancer
Source: Cells. 2021 Oct 6;10(10):2673. doi: 10.3390/cells10102673 (PMC8534855; doi:10.3390/cells10102673)
Supplement: Supplementary file 1 [file cells-10-02673-s001.zip › Table_S5.xlsx]

## Sheet: Sheet1
Table S5 Evaluation of effectiveness of compound to acidosis dependent prognosis-related manner
Compound	Information gain	Total probe	RUU	PDU	RUD	PDD	PDU+RUD	RUU+PDD	PDU+RUD/RUU+PDD
Bruceine D	0.241137	42	3	24	10	5	34	8	4.25
Nitidine chloride	0.222505	29	4	16	7	2	23	6	3.83333
Narciclasine	0.205927	41	3	22	10	6	32	9	3.55556
Beta-ecdysterone	0.143391	12	3	8	1	0	9	3	3
Strychnine	0.137814	17	1	12	2	2	14	3	4.66667
Schisantherin A	0.123248	13	1	8	2	2	10	3	3.33333
Sanguinarine	0.12279	20	4	12	3	1	15	5	3
(+)2-(1-hydroxyl-4-oxocyclohexyl) ethyl caffeate	0.105238	18	1	8	4	5	12	6	2
Gallic acid	0.094018	11	3	6	0	2	6	5	1.2
Ginkgolide B	0.0903175	13	2	7	0	4	7	6	1.16667
Tetrahydropalmatine	0.0903175	13	2	7	0	4	7	6	1.16667
Dioscin	0.0857236	18	2	10	3	3	13	5	2.6
Emodin	0.0853909	14	3	8	0	3	8	6	1.33333
Bilobalide	0.0794229	24	8	13	0	3	13	11	1.18182
Liquiritin	0.0769159	19	3	11	0	5	11	8	1.375
Saikosaponin D	0.076869	12	3	7	0	2	7	5	1.4
Isoborneol	0.0760099	21	6	12	0	3	12	9	1.33333
Oridonin	0.071404	18	1	7	4	6	11	7	1.57143
Curculigoside	0.0670039	18	3	11	0	4	11	7	1.57143
Benzoylhypaconitine	0.0648813	15	2	9	0	4	9	6	1.5
Sennoside A	0.0638499	20	2	11	3	4	14	6	2.33333
Imperatorin	0.0629779	11	4	6	0	1	6	5	1.2
Oleanic acid	0.0629779	11	1	6	0	4	6	5	1.2
Matrine	0.0494913	19	2	12	0	5	12	7	1.71429
Magnolol	0.0428339	13	1	8	0	4	8	5	1.6
L-scopolamine	0.0406956	15	1	9	0	5	9	6	1.5
Osthole	0.0363731	12	1	8	0	3	8	4	2
Ainsliadimer A	0.0305016	22	2	9	4	7	13	9	1.44444
Hypaconitine	0.0303823	16	1	11	1	3	12	4	3
Benzoylaconitine	0.0292375	15	1	7	2	5	9	6	1.5
Honokiol	0.0277402	11	2	8	0	1	8	3	2.66667
Geniposide	0.0247576	18	2	10	2	4	12	6	2
Ephedrine hydrochloride	0.0237959	21	6	14	0	1	14	7	2
Daidzin	0.0229872	12	1	9	0	2	9	3	3
Scutellarein	0.0229872	12	1	9	0	2	9	3	3
Silybin	0.0229872	12	2	9	0	1	9	3	3
Japonicone A	0.0203975	37	7	14	8	8	22	15	1.46667
Macrozamin	0.017072	21	3	10	3	5	13	8	1.625
Phillyrin	0.0107151	17	3	8	1	5	9	8	1.125
Notoginsenoside R1	0.00855079	12	2	7	1	2	8	4	2
Britanin	0.0050188	26	7	7	7	5	14	12	1.16667
6-gingerol	0.00449683	16	3	8	1	4	9	7	1.28571
Salidroside	0.00395908	15	3	9	1	2	10	5	2
Schizandrin	0.00395908	15	2	9	1	3	10	5	2
Ginsenoside Rb1	0.00339642	15	5	7	1	2	8	7	1.14286
Four mixture	0.00324057	31	5	12	5	9	17	14	1.21429
Lobetyolin	0.00243711	13	4	6	1	2	7	6	1.16667
Aconitine	0.00162479	16	6	8	1	1	9	7	1.28571
Ginsenoside Rb3	0.00162479	16	6	8	1	1	9	7	1.28571
Santonin	0.00108293	21	3	12	1	5	13	8	1.625
Ursodeoxycholic acid	0.000375889	15	3	8	1	3	9	6	1.5
Paeoniflorin	0.000333459	17	7	8	1	1	9	8	1.125
Chelerythrine	0.000333306	16	2	9	1	4	10	6	1.66667
Chlorogenic acid	0	12	2	6	1	3	7	5	1.4
