# Supplementary material for: In Silico Evaluation of Natural Compounds for an Acidic Extracellular Environment in Human Breast Cancer
Source: Cells. 2021 Oct 6;10(10):2673. doi: 10.3390/cells10102673 (PMC8534855; doi:10.3390/cells10102673)
Supplement: Supplementary file 1 [file cells-10-02673-s001.zip › Table_S6.xlsx]

## Sheet: Sheet1
Table S6 Whole significantly differential expressed genes between BD treated and control group
Gene	Probe	FC	P-value
RFC2	RFC2|1053_at	0.680551	0.0137203
HSPA6	HSPA6|117_at	2.0382	0.0362637
THRA	THRA|1316_at	-0.78855	0.0133104
CHURC1-FNTB	CHURC1-FNTB|1773_at	1.47539	0.00624231
FNTB	FNTB|1773_at	1.47539	0.00624231
BAD	BAD|1861_at	1.18494	0.012592
CAPNS1	CAPNS1|200001_at	1.22354	0.00499957
EIF4G2	EIF4G2|200004_at	-0.803797	0.000809538
PARK7	PARK7|200006_at	-0.74334	0.00869476
GDI2	GDI2|200008_s_at	1.37057	0.00717897
RPL11	RPL11|200010_at	-0.500955	0.0104097
ARF3	ARF3|200011_s_at	-0.976131	0.0029751
RPL21P28	RPL21P28|200012_x_at	-1.00306	0.0124017
RPL21	RPL21|200012_x_at	-1.00306	0.0124017
SNORA27	SNORA27|200012_x_at	-1.00306	0.0124017
SNORD102	SNORD102|200012_x_at	-1.00306	0.0124017
RPL24	RPL24|200013_at	-0.549696	0.0115551
SEPT2	SEPT2|200015_s_at	-0.863817	0.00632525
HNRNPA1P10	HNRNPA1P10|200016_x_at	-1.00082	0.00202262
HNRNPA1	HNRNPA1|200016_x_at	-1.00082	0.00202262
RPS27A	RPS27A|200017_at	-0.677597	0.000211408
LOC100508408	LOC100508408|200018_at	-0.686003	0.00768485
SNORD14B	SNORD14B|200018_at	-0.686003	0.00768485
RPS13	RPS13|200018_at	-0.686003	0.00768485
FAU	FAU|200019_s_at	-0.669766	0.011662
TARDBP	TARDBP|200020_at	-0.762318	0.00545169
CFL1	CFL1|200021_at	-0.561087	0.0402443
EIF3F	EIF3F|200023_s_at	-0.878669	0.00250652
RPL27	RPL27|200025_s_at	-0.70266	0.01715
RPL34	RPL34|200026_at	-1.07393	0.017917
NARS	NARS|200027_at	-0.67098	0.0077729
STARD7	STARD7|200028_s_at	-0.897514	0.0167766
RPL19	RPL19|200029_at	-0.64603	0.025696
SLC25A3	SLC25A3|200030_s_at	-0.853684	0.00282619
SNORD35B	SNORD35B|200031_s_at	-0.589702	0.0218358
RPS11	RPS11|200031_s_at	-0.589702	0.0218358
RPL9	RPL9|200032_s_at	-0.581791	0.00966519
CBX3	CBX3|200037_s_at	-1.13769	0.00253928
SNORD58C	SNORD58C|200038_s_at	-0.611141	0.00785482
SNORD58A	SNORD58A|200038_s_at	-0.611141	0.00785482
C18orf32	C18orf32|200038_s_at	-0.611141	0.00785482
RPL17	RPL17|200038_s_at	-0.611141	0.00785482
SNORD58B	SNORD58B|200038_s_at	-0.611141	0.00785482
RPL17-C18orf32	RPL17-C18orf32|200038_s_at	-0.611141	0.00785482
PSMB2	PSMB2|200039_s_at	-0.510621	0.0150821
KHDRBS1	KHDRBS1|200040_at	-0.601557	0.0281977
ATP6V1G2-DDX39B	ATP6V1G2-DDX39B|200041_s_at	0.840882	0.0244975
SNORD84	SNORD84|200041_s_at	0.840882	0.0244975
DDX39B	DDX39B|200041_s_at	0.840882	0.0244975
GATC	GATC|200044_at	-0.55825	0.0286678
SRSF9	SRSF9|200044_at	-0.55825	0.0286678
JTB	JTB|200048_s_at	-1.10605	0.00188158
KAT7	KAT7|200049_at	0.897462	0.0205381
SART1	SART1|200051_at	0.601204	0.0215973
ZPR1	ZPR1|200054_at	1.27065	0.0109203
LOC101929240	LOC101929240|200058_s_at	-0.838147	0.00205414
SNRNP200	SNRNP200|200058_s_at	-0.838147	0.00205414
RPS24	RPS24|200061_s_at	-0.703547	0.00382812
RPL30	RPL30|200062_s_at	-0.682776	0.0238764
NPM1	NPM1|200063_s_at	-0.575627	0.0196796
HSP90AB1	HSP90AB1|200064_at	-0.970906	0.000772308
RPL14	RPL14|200074_s_at	-0.992731	0.000135901
ATP6V0B	ATP6V0B|200078_s_at	0.612018	0.00414677
H3F3A	H3F3A|200080_s_at	-0.973585	0.00789192
H3F3AP4	H3F3AP4|200080_s_at	-0.973585	0.00789192
H3F3B	H3F3B|200080_s_at	-0.973585	0.00789192
RPS6	RPS6|200081_s_at	-0.516008	0.0190498
RPS7	RPS7|200082_s_at	-0.502264	0.0108824
USP22	USP22|200083_at	-0.728613	0.0115805
COX4I1	COX4I1|200086_s_at	-0.545908	0.0367325
TMED2	TMED2|200087_s_at	-0.717089	0.00627938
RPL12	RPL12|200088_x_at	-0.710982	0.00780959
NBEAL1	NBEAL1|200088_x_at	-0.710982	0.00780959
FNTA	FNTA|200090_at	1.26875	0.0117917
RPS25	RPS25|200091_s_at	-0.643712	0.00506266
RPL37	RPL37|200092_s_at	-0.86588	0.00596755
HINT1	HINT1|200093_s_at	-0.661634	0.00445897
RPS10	RPS10|200095_x_at	-0.747103	0.00297249
ATP6V0E1	ATP6V0E1|200096_s_at	-0.667134	0.0014006
ANAPC5	ANAPC5|200098_s_at	-0.821252	0.000473331
SNORD73A	SNORD73A|200099_s_at	-0.569481	0.0114086
RPS3A	RPS3A|200099_s_at	-0.569481	0.0114086
EIF3A	EIF3A|200596_s_at	0.89077	0.0162073
EIF3A	EIF3A|200597_at	0.887611	0.0294635
MIR3652	MIR3652|200598_s_at	-1.52772	0.00646642
HSP90B1	HSP90B1|200598_s_at	-1.52772	0.00646642
MIR3652	MIR3652|200599_s_at	-1.20927	0.0233731
HSP90B1	HSP90B1|200599_s_at	-1.20927	0.0233731
MSN	MSN|200600_at	1.17602	0.0401911
APP	APP|200602_at	-1.47269	0.00164173
PRKAR1A	PRKAR1A|200604_s_at	0.55795	0.00328604
RAD21	RAD21|200608_s_at	-0.538219	0.0220072
AP2M1	AP2M1|200613_at	-0.876995	0.00255494
CLTC	CLTC|200614_at	-0.566304	0.017509
MLEC	MLEC|200616_s_at	-1.56014	0.00636174
MLEC	MLEC|200617_at	-0.953683	0.0341027
SF3B2	SF3B2|200619_at	0.699233	0.0428909
TMEM59	TMEM59|200620_at	-0.638465	0.049207
CSRP1	CSRP1|200621_at	1.3539	0.00166654
CALM2	CALM2|200623_s_at	-0.845036	0.0280157
CALM1	CALM1|200623_s_at	-0.845036	0.0280157
CALM3	CALM3|200623_s_at	-0.845036	0.0280157
CAP1	CAP1|200625_s_at	-0.903534	0.00809213
SETSIP	SETSIP|200630_x_at	-0.746391	0.0100849
SET	SET|200630_x_at	-0.746391	0.0100849
SETSIP	SETSIP|200631_s_at	-0.829717	0.0087323
SET	SET|200631_s_at	-0.829717	0.0087323
PFN1	PFN1|200634_at	0.813357	0.00683342
PTPRF	PTPRF|200635_s_at	-0.796706	0.0218558
PTPRF	PTPRF|200636_s_at	-1.15032	0.0328957
YWHAZ	YWHAZ|200638_s_at	-0.651873	0.00613611
YWHAZ	YWHAZ|200641_s_at	0.574141	0.0070002
SOD1	SOD1|200642_at	-0.95578	0.0104056
HDLBP	HDLBP|200643_at	1.36206	0.0163704
GLUL	GLUL|200648_s_at	1.04128	0.0056841
NUCB1	NUCB1|200649_at	-1.04509	0.00817835
LDHA	LDHA|200650_s_at	-0.809446	0.00460855
SSR2	SSR2|200652_at	-0.715835	0.00633471
P4HB	P4HB|200656_s_at	0.554866	0.00393483
SLC25A5	SLC25A5|200657_at	-0.612671	0.00139821
PHB	PHB|200659_s_at	-1.41169	0.0182759
CTSA	CTSA|200661_at	-0.916046	0.00569336
TOMM20	TOMM20|200662_s_at	-0.840518	0.0035759
UBE2D3	UBE2D3|200668_s_at	-0.564693	0.00851969
LAPTM4A	LAPTM4A|200673_at	-0.871096	0.00573333
RPL32	RPL32|200674_s_at	-0.77528	0.00649418
CD81	CD81|200675_at	-1.45846	0.00235822
PTTG1IP	PTTG1IP|200677_at	-0.578033	0.00780851
GRN	GRN|200678_x_at	-1.53129	0.0112973
HMGB1	HMGB1|200679_x_at	-0.543422	0.00471698
HMGB1	HMGB1|200680_x_at	-0.868274	0.00178126
GLO1	GLO1|200681_at	-1.00141	0.00708477
UBE2L3	UBE2L3|200683_s_at	-0.60167	0.0185868
MIR3654	MIR3654|200689_x_at	-0.602265	0.00472393
EEF1G	EEF1G|200689_x_at	-0.602265	0.00472393
YWHAQ	YWHAQ|200693_at	-0.571417	0.0167745
GSN	GSN|200696_s_at	-1.5968	0.00300539
HK1	HK1|200697_at	0.816436	0.00288646
KDELR2	KDELR2|200698_at	-0.864954	0.00189342
KDELR2	KDELR2|200700_s_at	-0.719997	0.00525265
EEF1B2	EEF1B2|200705_s_at	-0.626186	0.00264826
SNORA41	SNORA41|200705_s_at	-0.626186	0.00264826
FKBP1A	FKBP1A|200709_at	-0.746367	0.00187151
LOC101929368	LOC101929368|200709_at	-0.746367	0.00187151
ACADVL	ACADVL|200710_at	1.07225	0.0181016
SKP1	SKP1|200711_s_at	-0.742619	8.32434e-05
SNORD35A	SNORD35A|200715_x_at	-0.636594	0.00103287
SNORD32A	SNORD32A|200715_x_at	-0.636594	0.00103287
SNORD34	SNORD34|200715_x_at	-0.636594	0.00103287
RPL13A	RPL13A|200715_x_at	-0.636594	0.00103287
SNORD33	SNORD33|200715_x_at	-0.636594	0.00103287
SNORD35A	SNORD35A|200716_x_at	-0.628866	0.039555
RPL13AP5	RPL13AP5|200716_x_at	-0.628866	0.039555
SNORD32A	SNORD32A|200716_x_at	-0.628866	0.039555
SNORD34	SNORD34|200716_x_at	-0.628866	0.039555
RPL13A	RPL13A|200716_x_at	-0.628866	0.039555
SNORD33	SNORD33|200716_x_at	-0.628866	0.039555
RPL7	RPL7|200717_x_at	-0.705004	0.00383909
SKP1	SKP1|200718_s_at	-0.65878	0.0055298
SKP1	SKP1|200719_at	-0.897983	0.00434192
CAPRIN1	CAPRIN1|200722_s_at	1.99833	0.00534425
CAPRIN1	CAPRIN1|200723_s_at	0.600537	0.0164532
RPL10	RPL10|200725_x_at	-0.6372	0.0499141
SNORA70	SNORA70|200725_x_at	-0.6372	0.0499141
PPP1CC	PPP1CC|200726_at	-0.690413	0.0226774
PTP4A1	PTP4A1|200730_s_at	1.47889	0.013902
PTP4A1	PTP4A1|200731_s_at	0.853594	0.00338903
PGK1	PGK1|200737_at	-1.10897	0.00940118
PGK1	PGK1|200738_s_at	-1.17098	0.00358479
SUMO3	SUMO3|200740_s_at	-1.14616	0.00520521
RPS27	RPS27|200741_s_at	-0.687764	0.0169391
GNB1	GNB1|200744_s_at	-0.651575	0.0135477
GNB1	GNB1|200745_s_at	-0.502576	0.0187305
NUMA1	NUMA1|200747_s_at	-0.642525	0.0177552
CALU	CALU|200755_s_at	-1.10435	0.00992379
CALU	CALU|200757_s_at	-1.21995	0.0367593
NFE2L1	NFE2L1|200758_s_at	0.627947	0.00490768
ARL6IP5	ARL6IP5|200760_s_at	0.578447	0.0173242
DPYSL2	DPYSL2|200762_at	-2.23888	0.00255246
RPLP1	RPLP1|200763_s_at	-0.566826	0.0104276
MAT2A	MAT2A|200768_s_at	-1.27364	0.00102423
MIR1244-3	MIR1244-3|200772_x_at	-1.11042	0.00331142
MIR1244-2	MIR1244-2|200772_x_at	-1.11042	0.00331142
LOC100506248	LOC100506248|200772_x_at	-1.11042	0.00331142
LOC728026	LOC728026|200772_x_at	-1.11042	0.00331142
MIR1244-1	MIR1244-1|200772_x_at	-1.11042	0.00331142
PTMA	PTMA|200772_x_at	-1.11042	0.00331142
PTMA	PTMA|200773_x_at	-0.919812	0.00639354
FAM120A	FAM120A|200774_at	-0.682879	0.00318139
BZW1	BZW1|200776_s_at	0.673435	0.0345114
ATF4	ATF4|200779_at	0.895834	0.017191
RPS15A	RPS15A|200781_s_at	-0.672572	0.000420398
STMN1	STMN1|200783_s_at	-1.23497	0.000119691
ECH1	ECH1|200789_at	1.12804	0.00963774
ODC1	ODC1|200790_at	1.17088	0.00589728
DAZAP2	DAZAP2|200794_x_at	-0.907921	0.00917034
MCL1	MCL1|200796_s_at	1.27053	0.00669278
MCL1	MCL1|200798_x_at	1.15847	0.002214
HSPA1B	HSPA1B|200799_at	-0.781809	0.0134021
HSPA1A	HSPA1A|200799_at	-0.781809	0.0134021
HSPA1B	HSPA1B|200800_s_at	-0.883283	0.000956584
HSPA1L	HSPA1L|200800_s_at	-0.883283	0.000956584
HSPA1A	HSPA1A|200800_s_at	-0.883283	0.000956584
ACTB	ACTB|200801_x_at	-0.672626	0.00200648
TMBIM6	TMBIM6|200803_s_at	-0.625189	0.00660528
TMBIM6	TMBIM6|200804_at	-1.31107	0.0054579
HSPD1	HSPD1|200807_s_at	-0.825615	0.00794561
RPL12	RPL12|200809_x_at	-0.663676	0.0150145
CIRBP	CIRBP|200811_at	0.685092	0.0200155
PAFAH1B1	PAFAH1B1|200815_s_at	-0.544197	0.030751
RPS10	RPS10|200817_x_at	-0.704945	0.0078467
PSMD8	PSMD8|200820_at	0.538721	0.0320299
LAMP2	LAMP2|200821_at	-1.33469	0.0445518
RPL29	RPL29|200823_x_at	-0.953864	0.0124857
SNRPD2	SNRPD2|200826_at	-0.811232	0.0162487
PLOD1	PLOD1|200827_at	-1.72375	0.00215357
ZNF207	ZNF207|200828_s_at	1.07227	0.00330362
PSMD2	PSMD2|200830_at	-0.620364	0.00188317
SCD	SCD|200831_s_at	-2.18315	0.00255367
SCD	SCD|200832_s_at	-3.30921	0.00222752
RPS21	RPS21|200834_s_at	-0.737253	0.0155552
CTSB	CTSB|200839_s_at	-0.718376	0.0100922
KARS	KARS|200840_at	-0.577611	0.00977514
EPRS	EPRS|200842_s_at	-1.36782	0.00357985
EPRS	EPRS|200843_s_at	-1.07462	0.00626745
PRDX6	PRDX6|200845_s_at	-0.55381	0.00961977
PPP1CA	PPP1CA|200846_s_at	0.777297	0.0321441
SARAF	SARAF|200847_s_at	-1.88884	0.00734596
AHCYL1	AHCYL1|200849_s_at	-0.515755	0.0119183
IST1	IST1|200851_s_at	0.545243	0.00538441
H2AFZ	H2AFZ|200853_at	-0.684634	0.0351401
NCOR1	NCOR1|200854_at	0.608352	0.0412715
FLNA	FLNA|200859_x_at	-0.582785	0.0313826
DHCR24	DHCR24|200862_at	-0.984603	0.0167354
RNF114	RNF114|200867_at	0.722809	0.0148245
RNF114	RNF114|200868_s_at	1.23486	0.00226899
STRAP	STRAP|200870_at	-0.696591	0.0337736
PSAP	PSAP|200871_s_at	-1.81629	0.00903232
MIR1292	MIR1292|200874_s_at	1.93784	0.00100946
NOP56	NOP56|200874_s_at	1.93784	0.00100946
SNORD57	SNORD57|200874_s_at	1.93784	0.00100946
SNORD110	SNORD110|200874_s_at	1.93784	0.00100946
SNORD86	SNORD86|200874_s_at	1.93784	0.00100946
CCT4	CCT4|200877_at	-0.89485	0.00203344
DNAJA1	DNAJA1|200880_at	-1.29661	0.0144963
DNAJA1	DNAJA1|200881_s_at	-0.984728	0.00149331
RHOC	RHOC|200885_at	1.39682	0.0147933
PGAM1	PGAM1|200886_s_at	-0.868695	0.00591268
RPL23	RPL23|200888_s_at	-0.506975	0.0391349
SNORA21	SNORA21|200888_s_at	-0.506975	0.0391349
SSR1	SSR1|200889_s_at	-0.614043	0.0073788
SSR1	SSR1|200891_s_at	-0.805399	0.0432091
TRA2B	TRA2B|200892_s_at	0.577931	0.013418
FKBP4	FKBP4|200894_s_at	1.30322	0.00334711
FKBP4	FKBP4|200895_s_at	1.90472	0.00113039
MGEA5	MGEA5|200898_s_at	1.62583	0.00183295
MGEA5	MGEA5|200899_s_at	1.08654	0.00344773
SEP15	SEP15|200902_at	-0.847236	0.0377027
AHCY	AHCY|200903_s_at	-1.6928	0.00387934
PALLD	PALLD|200907_s_at	1.48974	0.00297831
LOC101927137	LOC101927137|200910_at	-0.500979	0.0285866
CCT3	CCT3|200910_at	-0.500979	0.0285866
PPM1G	PPM1G|200913_at	0.843712	0.0363286
BTG1	BTG1|200921_s_at	-0.689558	0.00673046
LGALS3BP	LGALS3BP|200923_at	-1.88033	0.00246941
SLC3A2	SLC3A2|200924_s_at	3.41764	0.00112364
COX6A1	COX6A1|200925_at	-0.623409	0.0196984
RPS23	RPS23|200926_at	-0.720723	0.00579569
TMED10	TMED10|200929_at	-0.861837	0.00756845
VCL	VCL|200931_s_at	0.834135	0.0149442
DCTN2	DCTN2|200932_s_at	0.593525	0.000203716
RPS4X	RPS4X|200933_x_at	-0.758227	0.0055461
HSBP1	HSBP1|200941_at	-0.623986	0.000370269
HSBP1	HSBP1|200942_s_at	-0.526184	0.0175133
LOC101927733	LOC101927733|200944_s_at	-0.509416	0.00370812
HMGN1	HMGN1|200944_s_at	-0.509416	0.00370812
SEC31A	SEC31A|200945_s_at	0.535607	0.00143421
SNORD54	SNORD54|200949_x_at	-0.687311	0.0167117
RPS20	RPS20|200949_x_at	-0.687311	0.0167117
ARPC1A	ARPC1A|200950_at	-0.894853	0.00116373
RPL31	RPL31|200962_at	-1.55325	0.000930943
RPL31	RPL31|200963_x_at	-0.691725	0.0209139
ABLIM1	ABLIM1|200965_s_at	-0.546535	0.0405561
PPIB	PPIB|200967_at	-0.539946	0.0144494
PPIB	PPIB|200968_s_at	-0.611143	0.0427957
LOC101928061	LOC101928061|200969_at	-0.544617	0.0030621
SERP1	SERP1|200969_at	-0.544617	0.0030621
TSPAN3	TSPAN3|200973_s_at	1.12243	0.000936666
PPT1	PPT1|200975_at	-1.83385	0.00349057
TAX1BP1	TAX1BP1|200977_s_at	-0.635767	0.0345699
ANXA6	ANXA6|200982_s_at	2.61373	0.00107725
IPO7	IPO7|200995_at	-0.616193	0.032193
RBM4	RBM4|200997_at	1.09371	0.000277151
RBM14-RBM4	RBM14-RBM4|200997_at	1.09371	0.000277151
CKAP4	CKAP4|200999_s_at	-0.630421	0.00805655
UBE2V1	UBE2V1|201002_s_at	-0.88262	0.00643901
TMEM189-UBE2V1	TMEM189-UBE2V1|201002_s_at	-0.88262	0.00643901
UBE2V2	UBE2V2|201002_s_at	-0.88262	0.00643901
TMEM189	TMEM189|201002_s_at	-0.88262	0.00643901
CD9	CD9|201005_at	-1.16084	0.00131654
TXNIP	TXNIP|201008_s_at	2.90585	0.00286572
TXNIP	TXNIP|201009_s_at	3.2348	0.000232027
TXNIP	TXNIP|201010_s_at	1.56244	0.00109732
RPN1	RPN1|201011_at	-0.655614	0.017003
PAICS	PAICS|201013_s_at	-0.528632	0.00762748
EIF1AX	EIF1AX|201017_at	-0.518924	0.0145119
EIF1AX	EIF1AX|201018_at	-0.536952	0.0321752
EIF1AX	EIF1AX|201019_s_at	-0.786454	0.0141705
EIF5B	EIF5B|201027_s_at	0.515879	0.047407
BLCAP	BLCAP|201032_at	-0.756931	0.0452981
RAD23A	RAD23A|201039_s_at	0.664284	0.0111809
DUSP1	DUSP1|201041_s_at	1.24338	0.0223597
ANP32A	ANP32A|201043_s_at	0.939252	0.027084
RPS18	RPS18|201049_s_at	-0.713378	0.0358902
PLD3	PLD3|201050_at	-0.678184	0.0333787
ANP32A	ANP32A|201051_at	0.953114	0.0113949
PSMF1	PSMF1|201052_s_at	1.54529	0.00805858
HNRNPA0	HNRNPA0|201054_at	-0.781426	0.0124196
HNRNPA0	HNRNPA0|201055_s_at	-0.832304	0.00332756
GOLGB1	GOLGB1|201056_at	0.750155	0.0344771
CTTN	CTTN|201059_at	-1.06188	0.00077095
STOM	STOM|201060_x_at	-1.07536	0.00501835
STOM	STOM|201061_s_at	-1.39392	0.000947972
LOC100996696	LOC100996696|201064_s_at	-0.832604	0.00500422
PABPC4	PABPC4|201064_s_at	-0.832604	0.00500422
CYC1	CYC1|201066_at	1.18787	0.0114129
PSMC2	PSMC2|201067_at	0.501993	0.000488437
SMARCC1	SMARCC1|201072_s_at	-0.925298	0.0348465
SMARCC1	SMARCC1|201074_at	-1.00064	0.00311525
TM9SF2	TM9SF2|201078_at	-1.41167	0.00530996
SYNGR2	SYNGR2|201079_at	0.959215	0.00659001
DCTN1	DCTN1|201082_s_at	0.995514	0.0209822
SLC4A5	SLC4A5|201082_s_at	0.995514	0.0209822
KPNA2	KPNA2|201088_at	-0.668717	0.0167065
TUBA1B	TUBA1B|201090_x_at	-0.752166	0.00589168
CBX3	CBX3|201091_s_at	-0.746343	0.0444923
RBBP7	RBBP7|201092_at	-0.884705	0.0145271
RPS29	RPS29|201094_at	-0.731316	0.0417525
ARF4	ARF4|201096_s_at	0.571014	0.00221152
COPB2	COPB2|201098_at	-0.632849	0.029529
NBPF19	NBPF19|201104_x_at	2.04188	0.000829196
NBPF9	NBPF9|201104_x_at	2.04188	0.000829196
NBPF14	NBPF14|201104_x_at	2.04188	0.000829196
NBPF11	NBPF11|201104_x_at	2.04188	0.000829196
NBPF15	NBPF15|201104_x_at	2.04188	0.000829196
NBPF20	NBPF20|201104_x_at	2.04188	0.000829196
NBPF10	NBPF10|201104_x_at	2.04188	0.000829196
NBPF8	NBPF8|201104_x_at	2.04188	0.000829196
NBPF26	NBPF26|201104_x_at	2.04188	0.000829196
NBPF25P	NBPF25P|201104_x_at	2.04188	0.000829196
LGALS1	LGALS1|201105_at	1.20836	0.00210127
GPX4	GPX4|201106_at	0.768782	0.0152221
CPE	CPE|201116_s_at	-0.739503	0.0486446
CPE	CPE|201117_s_at	-1.43263	0.00908906
PGD	PGD|201118_at	0.70005	0.0287948
PGRMC1	PGRMC1|201121_s_at	-1.10891	0.0051404
ITGB5	ITGB5|201125_s_at	-0.972449	0.00723791
ACLY	ACLY|201128_s_at	-1.22771	0.0151602
SRSF7	SRSF7|201129_at	1.6553	2.04572e-06
CDH1	CDH1|201131_s_at	-0.914556	0.00803642
PJA2	PJA2|201133_s_at	0.939668	0.000777103
COX7C	COX7C|201134_x_at	-0.737185	0.00919827
GPNMB	GPNMB|201141_at	2.40577	0.0178715
NFE2L2	NFE2L2|201146_at	0.522541	0.00454492
TIMP3	TIMP3|201147_s_at	-1.27991	0.0310872
MBNL1	MBNL1|201151_s_at	0.783779	0.0280172
MFN2	MFN2|201155_s_at	-0.752201	0.00612323
NMT1	NMT1|201157_s_at	1.09622	0.011637
NMT1	NMT1|201159_s_at	2.716	0.00127783
BHLHE40	BHLHE40|201170_s_at	3.0388	0.000788838
ATP6V0E1	ATP6V0E1|201171_at	-1.20652	0.0159427
ATP6V0E1	ATP6V0E1|201172_x_at	-0.670924	0.00356838
TERF2IP	TERF2IP|201174_s_at	0.631801	0.00924419
TMX2	TMX2|201175_at	0.734659	0.00849599
ARCN1	ARCN1|201176_s_at	0.580234	0.0484277
FBXO7	FBXO7|201178_at	0.622276	0.00441861
CHD4	CHD4|201183_s_at	0.846402	0.00085058
CHD4	CHD4|201184_s_at	0.730931	0.00739653
HTRA1	HTRA1|201185_at	-1.1397	0.00132281
LRPAP1	LRPAP1|201186_at	-1.45161	0.0208545
ITPR3	ITPR3|201188_s_at	1.03063	0.00431671
PITPNA	PITPNA|201190_s_at	-0.850704	0.0342263
PITPNA	PITPNA|201191_at	-0.720972	0.0177572
IDH1	IDH1|201193_at	-1.83673	0.00830931
SLC7A5	SLC7A5|201195_s_at	0.719459	0.0247386
AMD1	AMD1|201197_at	-0.565319	0.0392297
PSMD1	PSMD1|201199_s_at	-0.963786	0.0176736
PCNA	PCNA|201202_at	-0.825043	0.0406661
LGMN	LGMN|201212_at	-1.63577	0.0266253
RNU86	RNU86|201217_x_at	-0.82125	0.0130011
SNORD83B	SNORD83B|201217_x_at	-0.82125	0.0130011
RPL3	RPL3|201217_x_at	-0.82125	0.0130011
PSMD13	PSMD13|201233_at	0.601208	0.00262268
ILK	ILK|201234_at	1.87735	0.0222793
BTG2	BTG2|201235_s_at	1.5727	0.00418589
BTG2	BTG2|201236_s_at	2.23921	0.00300527
SPCS2	SPCS2|201240_s_at	-0.815686	0.00734512
DDX1	DDX1|201241_at	0.528841	0.025464
LOC101927673	LOC101927673|201245_s_at	1.18751	0.00359256
OTUB1	OTUB1|201245_s_at	1.18751	0.00359256
SLC2A1	SLC2A1|201249_at	1.56107	0.0158386
SLC2A1	SLC2A1|201250_s_at	-0.981023	0.0382132
PSMC4	PSMC4|201252_at	0.554292	0.0266085
CDIPT	CDIPT|201253_s_at	-1.51403	0.00662993
RPS6	RPS6|201254_x_at	-0.536386	0.0191633
COX7A2L	COX7A2L|201256_at	-0.970264	0.00746871
SNORD73A	SNORD73A|201257_x_at	-0.674681	0.00511659
RPS3A	RPS3A|201257_x_at	-0.674681	0.00511659
RALY	RALY|201271_s_at	0.582717	0.0260478
SRP9	SRP9|201273_s_at	-0.619271	0.0103623
FDPS	FDPS|201275_at	-0.939259	0.0182353
RAB5B	RAB5B|201276_at	-1.1896	0.00410405
HNRNPAB	HNRNPAB|201277_s_at	-0.708197	0.0156953
ADRM1	ADRM1|201281_at	1.19554	0.00564308
TRAK1	TRAK1|201283_s_at	3.93928	0.00494405
CYR61	CYR61|201289_at	1.28013	0.00817063
TOP2A	TOP2A|201291_s_at	-0.517309	0.0113462
WSB1	WSB1|201294_s_at	0.781681	0.0434762
WSB1	WSB1|201295_s_at	2.5281	0.0221667
MOB1A	MOB1A|201297_s_at	-0.715998	0.0163319
EIF4A3	EIF4A3|201303_at	-0.633447	0.00916685
ANP32B	ANP32B|201305_x_at	-0.756387	0.0151885
ANP32B	ANP32B|201306_s_at	-0.795753	0.00245809
SEPTIN11	SEPTIN11|201308_s_at	1.12916	0.0141226
SH3BGRL	SH3BGRL|201312_s_at	-0.957791	0.0229777
IFITM2	IFITM2|201315_x_at	0.553859	0.00814295
SMARCC2	SMARCC2|201320_at	0.742224	0.00364245
MIR6733	MIR6733|201323_at	-1.14497	0.00504777
EBNA1BP2	EBNA1BP2|201323_at	-1.14497	0.00504777
ETS2	ETS2|201328_at	1.72106	0.0145313
ETS2	ETS2|201329_s_at	0.903326	0.00778722
VAMP3	VAMP3|201336_at	-0.664636	0.00259532
SCP2	SCP2|201339_s_at	-0.623983	0.044321
ENC1	ENC1|201341_at	0.83041	0.0253359
GRHPR	GRHPR|201347_x_at	0.963236	0.00524999
BAZ2A	BAZ2A|201353_s_at	1.12312	0.00149306
SF3A1	SF3A1|201356_at	0.715074	0.0157358
SF3A1	SF3A1|201357_s_at	1.14255	0.00620407
COPB1	COPB1|201358_s_at	-1.0004	0.0107817
COPB1	COPB1|201359_at	-0.908317	0.0126533
TMEM109	TMEM109|201361_at	-0.92246	0.0141626
OAZ2	OAZ2|201364_s_at	-0.817191	0.0138893
OAZ2	OAZ2|201365_at	-0.984614	0.0108454
ZFP36L2	ZFP36L2|201367_s_at	3.80642	0.0355637
ZFP36L2	ZFP36L2|201368_at	-0.634584	0.00319125
CUL3	CUL3|201370_s_at	0.963202	0.0225426
CUL3	CUL3|201371_s_at	-0.631636	0.0029225
HNRNPF	HNRNPF|201376_s_at	0.61881	0.00672426
CRTAP	CRTAP|201380_at	-1.79135	0.00481828
CACYBP	CACYBP|201381_x_at	-0.722984	0.00519839
NBR1	NBR1|201383_s_at	0.588514	0.0263999
CSNK2B	CSNK2B|201390_s_at	1.11936	0.00132647
IGF2R	IGF2R|201392_s_at	-2.05855	0.000164879
IGF2R	IGF2R|201393_s_at	-1.68018	0.00351239
RBM5	RBM5|201394_s_at	1.44345	0.0254674
TRAM1	TRAM1|201398_s_at	-0.511969	0.0324082
RPL36A-HNRNPH2	RPL36A-HNRNPH2|201406_at	-0.634046	0.0162089
RPL36A	RPL36A|201406_at	-0.634046	0.0162089
PLEKHB2	PLEKHB2|201410_at	-1.25228	0.0392432
PLEKHB2	PLEKHB2|201411_s_at	-2.21672	0.00296113
LRP10	LRP10|201412_at	-1.64651	0.00270377
HSD17B4	HSD17B4|201413_at	-0.522266	0.0276174
SOX4	SOX4|201416_at	0.604921	0.0112286
SOX4	SOX4|201418_s_at	0.898115	0.0199739
IFI30	IFI30|201422_at	0.915304	0.00685915
PIK3R2	PIK3R2|201422_at	0.915304	0.00685915
CUL4A	CUL4A|201423_s_at	-0.707908	0.00880169
CLDN4	CLDN4|201428_at	0.769766	0.00174007
RPL37A	RPL37A|201429_s_at	-0.766849	0.0144069
EIF4E	EIF4E|201435_s_at	0.624265	0.0293483
DDX23	DDX23|201440_at	-1.34098	0.0102115
ATP6AP2	ATP6AP2|201443_s_at	-1.54548	0.000112071
ATP6AP2	ATP6AP2|201444_s_at	-0.953758	0.0250073
TIA1	TIA1|201449_at	-0.648297	0.0136906
RHEB	RHEB|201453_x_at	-0.806895	0.00125961
NPEPPS	NPEPPS|201454_s_at	-0.617528	0.00945785
JUN	JUN|201464_x_at	1.80067	0.000707801
JUN	JUN|201465_s_at	2.79428	0.00554533
JUN	JUN|201466_s_at	2.28963	0.00445985
NQO1	NQO1|201467_s_at	-0.834748	0.00831717
NQO1	NQO1|201468_s_at	-2.32696	0.000196455
GSTO1	GSTO1|201470_at	-0.583664	0.0169773
SQSTM1	SQSTM1|201471_s_at	1.65989	0.00191423
RRM1	RRM1|201477_s_at	-0.572012	0.00637841
MIR664B	MIR664B|201479_at	-0.640814	0.000314622
DKC1	DKC1|201479_at	-0.640814	0.000314622
SNORA56	SNORA56|201479_at	-0.640814	0.000314622
SUPT5H	SUPT5H|201480_s_at	0.552309	0.0476749
QSOX1	QSOX1|201482_at	-0.6168	0.0196679
RCN2	RCN2|201485_s_at	-1.30458	0.00162428
RCN2	RCN2|201486_at	-1.51659	0.00267876
CTSC	CTSC|201487_at	-0.916885	0.00738262
KHDRBS1	KHDRBS1|201488_x_at	-0.62582	0.018059
PPIF	PPIF|201489_at	0.5448	0.0456192
PPIF	PPIF|201490_s_at	2.33339	0.00230709
AHSA1	AHSA1|201491_at	-2.01319	0.0021796
RPL41	RPL41|201492_s_at	-0.846487	0.0178652
USP7	USP7|201499_s_at	0.524826	0.0215993
NFKBIA	NFKBIA|201502_s_at	1.67477	0.00491414
G3BP1	G3BP1|201503_at	-0.527082	0.00412209
TGFBI	TGFBI|201506_at	-3.15356	0.00683583
PFDN1	PFDN1|201507_at	0.675699	0.0422066
IGFBP4	IGFBP4|201508_at	0.514281	0.0370932
IDH3B	IDH3B|201509_at	0.963485	0.0298587
ELF3	ELF3|201510_at	1.806	0.00160905
TSN	TSN|201513_at	-1.04566	0.0130683
G3BP1	G3BP1|201514_s_at	0.666151	0.0063908
TSN	TSN|201515_s_at	-0.814655	0.00883205
CBX1	CBX1|201518_at	-0.94107	0.00954292
ARF5	ARF5|201526_at	0.535651	0.031954
LOC101927180	LOC101927180|201527_at	0.773126	0.0239781
ATP6V1F	ATP6V1F|201527_at	0.773126	0.0239781
RPA1	RPA1|201528_at	-1.87979	0.00118752
RPA1	RPA1|201529_s_at	-0.929106	0.0386086
ZFP36	ZFP36|201531_at	1.95336	0.00451611
UBL3	UBL3|201534_s_at	-0.882511	0.0454455
DUSP3	DUSP3|201537_s_at	0.83597	0.0350522
FHL1	FHL1|201539_s_at	0.666823	0.0386188
SAR1A	SAR1A|201542_at	-1.2202	0.018186
KDM5B	KDM5B|201548_s_at	1.13102	0.00926946
KDM5B	KDM5B|201549_x_at	0.885326	0.00884399
ACTG1	ACTG1|201550_x_at	-0.621647	0.0156675
ACTB	ACTB|201550_x_at	-0.621647	0.0156675
LAMP1	LAMP1|201551_s_at	-0.76245	0.0473669
LAMP1	LAMP1|201552_at	-1.27116	0.000215946
LAMP1	LAMP1|201553_s_at	-1.33436	0.00120011
MCM3	MCM3|201555_at	-0.615125	0.0208855
SORD	SORD|201563_at	-0.61412	0.00199856
SAMM50	SAMM50|201570_at	-0.764571	0.0338868
SNW1	SNW1|201575_at	0.820719	0.00032512
GLB1	GLB1|201576_s_at	-1.36026	0.00573662
TMPPE	TMPPE|201576_s_at	-1.36026	0.00573662
TMX4	TMX4|201581_at	-0.553511	0.0349069
SEC23B	SEC23B|201583_s_at	0.745786	0.0170456
SMC1A	SMC1A|201589_at	-0.886609	0.0286347
ANXA2	ANXA2|201590_x_at	-0.569922	0.0223185
ZC3H15	ZC3H15|201593_s_at	0.534182	0.0106147
PPP4R1	PPP4R1|201594_s_at	0.624035	0.0411624
KRT18	KRT18|201596_x_at	-0.633554	0.0272572
COX7A2	COX7A2|201597_at	-0.721366	0.00608629
INPPL1	INPPL1|201598_s_at	0.724537	0.043641
OAT	OAT|201599_at	-1.08817	0.00407552
IFITM2	IFITM2|201601_x_at	-1.215	0.00282733
IFITM1	IFITM1|201601_x_at	-1.215	0.00282733
PPP1R12A	PPP1R12A|201602_s_at	0.556368	0.0252756
PPP1R12A	PPP1R12A|201604_s_at	1.41942	0.0153523
ICMT	ICMT|201611_s_at	-0.568384	0.0255617
GPAA1	GPAA1|201618_x_at	0.776788	0.0344194
PRDX3	PRDX3|201619_at	-1.38329	0.00362328
MBTPS1	MBTPS1|201620_at	-0.832351	0.0122772
INSIG1	INSIG1|201625_s_at	-1.95623	0.00372249
INSIG1	INSIG1|201626_at	-2.66717	0.00113866
INSIG1	INSIG1|201627_s_at	-1.9151	0.004853
ACP1	ACP1|201630_s_at	0.679332	0.00336992
IER3	IER3|201631_s_at	-0.573875	0.0328633
BST2	BST2|201641_at	-1.68407	0.0111895
TSTA3	TSTA3|201644_at	1.62473	0.00971964
SCARB2	SCARB2|201646_at	0.993984	0.00216013
CNIH1	CNIH1|201653_at	-0.531208	0.0493109
HSPG2	HSPG2|201654_s_at	1.87723	0.0325058
ITGA6	ITGA6|201656_at	1.12854	0.00193659
ARL1	ARL1|201659_s_at	-0.641357	0.00552926
ACSL3	ACSL3|201660_at	1.03013	0.00223397
ACSL3	ACSL3|201661_s_at	0.541344	0.022178
ACSL3	ACSL3|201662_s_at	-0.597833	0.0119955
SMC4	SMC4|201663_s_at	1.09607	0.0152423
SMC4	SMC4|201664_at	0.701995	0.0101276
RPS17	RPS17|201665_x_at	-0.751955	0.0216578
MARCKS	MARCKS|201669_s_at	-0.980259	0.0323534
PSMA1	PSMA1|201676_x_at	-1.41306	0.00434748
API5	API5|201687_s_at	-0.607849	0.0152123
TPD52	TPD52|201690_s_at	-0.650317	0.00660893
EGR1	EGR1|201693_s_at	1.21579	0.0197887
EGR1	EGR1|201694_s_at	0.731457	0.00296139
SRSF4	SRSF4|201696_at	0.790983	0.00110263
GATC	GATC|201698_s_at	-0.640769	0.0150635
SRSF9	SRSF9|201698_s_at	-0.640769	0.0150635
CCND3	CCND3|201700_at	1.22751	0.0274395
PPP1R10	PPP1R10|201703_s_at	0.69273	0.0261994
MYBL2	MYBL2|201710_at	-1.1284	0.012219
RANBP2	RANBP2|201711_x_at	1.63463	0.00250895
RANBP2	RANBP2|201712_s_at	1.50977	0.00797684
RANBP2	RANBP2|201713_s_at	0.691876	0.0156891
ACIN1	ACIN1|201715_s_at	1.43761	0.00118623
EPB41L2	EPB41L2|201718_s_at	1.61865	0.000318927
EPB41L2	EPB41L2|201719_s_at	0.61352	0.0157471
GALNT1	GALNT1|201724_s_at	-0.576143	0.040622
ELAVL1	ELAVL1|201726_at	-0.536282	0.0117395
KIAA0100	KIAA0100|201729_s_at	-1.80538	0.0207594
CLCN3	CLCN3|201732_s_at	0.653767	0.0376603
CLCN3	CLCN3|201734_at	0.73651	0.0439174
MARCH6	MARCH6|201736_s_at	-1.00828	0.00488327
MARCH6	MARCH6|201737_s_at	-0.962072	0.0491612
SRSF1	SRSF1|201742_x_at	0.658602	0.0302308
CD14	CD14|201743_at	0.711689	0.00641546
TP53	TP53|201746_at	1.04002	0.0143515
COX6C	COX6C|201754_at	-0.543423	0.0249794
RPA2	RPA2|201756_at	0.963226	0.0233539
NDUFS5	NDUFS5|201757_at	-0.615478	0.014453
RPL10	RPL10|201757_at	-0.615478	0.014453
WSB2	WSB2|201760_s_at	-1.04708	0.0103284
MTHFD2	MTHFD2|201761_at	-0.657582	0.00352788
HEXA	HEXA|201765_s_at	-0.915754	0.0166232
CLINT1	CLINT1|201768_s_at	0.72915	0.0220534
EFCAB14	EFCAB14|201776_s_at	-1.2159	0.0024106
EFCAB14	EFCAB14|201778_s_at	-1.22188	0.0373057
AIP	AIP|201781_s_at	0.913286	0.0149189
AIP	AIP|201782_s_at	0.565289	0.00958492
RELA	RELA|201783_s_at	1.79023	0.00183529
DDX42	DDX42|201788_at	0.922543	0.01058
PCNXL4	PCNXL4|201789_at	0.572317	0.0314711
AEBP1	AEBP1|201792_at	3.513	0.00144942
SMG7	SMG7|201794_s_at	1.11661	0.0418034
LBR	LBR|201795_at	-0.692098	0.0068547
VARS	VARS|201797_s_at	1.51141	0.0174479
OSBP	OSBP|201800_s_at	0.810398	0.0431197
POLR2B	POLR2B|201803_at	-0.953898	0.0409578
PRKAG1	PRKAG1|201805_at	1.13272	0.0126401
SH3BP5	SH3BP5|201810_s_at	0.549495	0.0267693
TBC1D5	TBC1D5|201813_s_at	-1.06488	0.00726226
TBC1D5	TBC1D5|201814_at	-1.05615	0.0208095
LPCAT1	LPCAT1|201818_at	-2.43229	0.00100568
SCCPDH	SCCPDH|201825_s_at	-1.08314	8.27629e-05
SCCPDH	SCCPDH|201826_s_at	-1.17256	0.00286246
FAM127A	FAM127A|201828_x_at	-1.17858	0.00112839
PRKAB1	PRKAB1|201834_at	1.12744	0.0391893
PRKAB1	PRKAB1|201835_s_at	1.9745	0.0127058
EFEMP1	EFEMP1|201842_s_at	0.668758	0.0358186
EFEMP1	EFEMP1|201843_s_at	0.971327	0.0462246
RYBP	RYBP|201844_s_at	1.21417	0.00552776
RYBP	RYBP|201845_s_at	1.02905	0.00497494
RYBP	RYBP|201846_s_at	1.74239	0.00262253
LIPA	LIPA|201847_at	-2.27511	0.000173982
CDC25B	CDC25B|201853_s_at	1.07895	0.00178895
ZFR	ZFR|201856_s_at	1.85611	0.00943988
ZFR	ZFR|201857_at	0.734877	0.0141969
PLAT	PLAT|201860_s_at	-1.43568	0.0272899
LRRFIP1	LRRFIP1|201862_s_at	-0.624717	0.0330372
NR3C1	NR3C1|201865_x_at	0.925668	0.0340984
NR3C1	NR3C1|201866_s_at	0.843858	0.0117843
TBL1X	TBL1X|201867_s_at	-0.948116	0.00237134
TOMM34	TOMM34|201870_at	1.13641	0.00242393
ARIH1	ARIH1|201878_at	0.9967	0.013198
ARIH1	ARIH1|201879_at	0.785022	0.0252115
ARIH1	ARIH1|201880_at	0.61513	0.0109267
CEACAM5	CEACAM5|201884_at	-3.06011	0.0015138
CYB5R3	CYB5R3|201885_s_at	-1.27322	0.010266
DCAF11	DCAF11|201886_at	-0.939837	0.0217532
FAM3C	FAM3C|201889_at	-0.94792	0.0121128
SSR1	SSR1|201894_s_at	-0.912551	0.00431689
CKS1B	CKS1B|201897_s_at	-1.13244	0.00273897
AKR1A1	AKR1A1|201900_s_at	-0.628513	0.0136797
UQCRC1	UQCRC1|201903_at	0.806836	0.00376764
SLC25A36	SLC25A36|201918_at	0.514011	0.0315853
GNG10	GNG10|201921_at	-0.986393	0.0199814
PRDX4	PRDX4|201923_at	-0.848645	0.000685325
MCM6	MCM6|201930_at	-0.902405	0.00976875
LRRC41	LRRC41|201932_at	1.41336	0.00786223
WDR82	WDR82|201934_at	-1.22917	0.0458616
CDK2AP1	CDK2AP1|201938_at	-0.84864	0.00825371
HEXB	HEXB|201944_at	-0.734079	0.00600381
FURIN	FURIN|201945_at	-0.696851	0.00797474
CCT2	CCT2|201946_s_at	1.34379	0.000356725
GNL2	GNL2|201948_at	0.824598	0.00517584
CAPZB	CAPZB|201950_x_at	0.626416	0.0212448
ALCAM	ALCAM|201952_at	-0.978544	0.00189759
CIB1	CIB1|201953_at	0.571333	0.012428
ARPC1B	ARPC1B|201954_at	-0.638772	0.00813611
PPP1R12B	PPP1R12B|201957_at	0.736184	0.00456024
MYCBP2	MYCBP2|201959_s_at	0.54707	0.0250605
ATP6V1A	ATP6V1A|201971_s_at	1.39065	0.000138877
RSU1	RSU1|201980_s_at	-1.03087	0.00788211
HNRNPDL	HNRNPDL|201993_x_at	1.10604	0.0217439
MORF4L2	MORF4L2|201994_at	-0.592041	0.0406532
NDUFA6	NDUFA6|202000_at	0.718204	0.0407303
ST14	ST14|202005_at	-1.8749	0.00460028
PTPN12	PTPN12|202006_at	0.631896	0.0328001
PTGR2	PTGR2|202010_s_at	0.765452	0.00277986
ZNF410	ZNF410|202010_s_at	0.765452	0.00277986
EXT2	EXT2|202013_s_at	-0.75163	0.00817025
MEST	MEST|202016_at	-0.952434	0.00449711
LANCL1	LANCL1|202020_s_at	-0.757473	0.00755314
ALDOC	ALDOC|202022_at	0.555695	0.0124122
EFNA1	EFNA1|202023_at	1.02499	0.0133513
RPL38	RPL38|202028_s_at	-1.82719	0.00804318
RPL38	RPL38|202029_x_at	-0.563033	0.0246457
WIPI2	WIPI2|202031_s_at	-2.37279	0.00195121
MAN2A2	MAN2A2|202032_s_at	1.24971	0.0044053
RB1CC1	RB1CC1|202033_s_at	-0.664187	0.00443676
SFRP1	SFRP1|202036_s_at	1.02067	0.0393805
UBE4A	UBE4A|202038_at	-0.708618	0.000870917
MYO18A	MYO18A|202039_at	0.968568	0.00750379
TIAF1	TIAF1|202039_at	0.968568	0.00750379
KDM5A	KDM5A|202040_s_at	-1.11002	0.0133922
ZMYM4	ZMYM4|202050_s_at	0.660372	0.0304984
ZMYM4	ZMYM4|202051_s_at	0.986836	0.00838486
ALDH3A2	ALDH3A2|202054_s_at	-1.00334	0.0237533
KPNA1	KPNA1|202056_at	0.511273	0.0349487
KPNA1	KPNA1|202058_s_at	0.913426	0.0122955
CTR9	CTR9|202060_at	-0.658928	0.0138362
SEL1L	SEL1L|202061_s_at	-0.697411	0.0197175
SEL1L	SEL1L|202064_s_at	-1.47667	0.00639207
PPFIA1	PPFIA1|202065_s_at	0.741432	0.000631738
LDLR	LDLR|202067_s_at	-0.960039	0.00862105
LDLR	LDLR|202068_s_at	-1.9047	0.00203652
IDH3A	IDH3A|202069_s_at	0.573112	0.0111417
IDH3A	IDH3A|202070_s_at	0.853109	0.0184581
SDC4	SDC4|202071_at	0.903261	0.00633858
OPTN	OPTN|202073_at	2.49912	0.0036133
OPTN	OPTN|202074_s_at	1.29009	0.0157863
NDUFAB1	NDUFAB1|202077_at	-0.667999	0.00553953
COPS3	COPS3|202078_at	1.03748	0.00142814
IER2	IER2|202081_at	1.55076	0.00901277
TJP2	TJP2|202085_at	0.675106	0.00602459
CTSL	CTSL|202087_s_at	-1.85793	0.00171162
SLC39A6	SLC39A6|202088_at	-0.829504	0.0117009
ARL2BP	ARL2BP|202092_s_at	1.47634	0.0233286
PRMT2	PRMT2|202098_s_at	-1.04301	0.0038648
RALB	RALB|202101_s_at	1.63515	0.01357
BRD4	BRD4|202102_s_at	0.613771	0.0261476
BRD4	BRD4|202103_at	0.572245	0.0287426
SPG7	SPG7|202104_s_at	0.724631	0.0019377
LOC101930112	LOC101930112|202104_s_at	0.724631	0.0019377
GOLGA3	GOLGA3|202106_at	-0.715458	0.0029484
COX7B	COX7B|202110_at	-0.525769	0.0180418
SLC4A2	SLC4A2|202111_at	1.19438	0.0325525
SNX2	SNX2|202113_s_at	1.17088	0.00444939
DPF2	DPF2|202116_at	1.64811	0.00455137
CPNE3	CPNE3|202118_s_at	-0.71877	0.0163509
CPNE3	CPNE3|202119_s_at	-0.824483	0.00994063
PLIN3	PLIN3|202122_s_at	1.03882	0.00291445
TRAK2	TRAK2|202125_s_at	-1.07108	0.00293241
AREL1	AREL1|202128_at	-0.573128	0.00999469
RIOK3	RIOK3|202129_s_at	1.65273	0.0112977
RIOK3	RIOK3|202130_at	1.65008	0.0022209
WWTR1	WWTR1|202134_s_at	0.866137	0.00366825
ACTR1B	ACTR1B|202135_s_at	0.599474	0.00623613
ZMYND11	ZMYND11|202137_s_at	1.39298	0.00212283
AIMP2	AIMP2|202138_x_at	1.01847	0.00123546
CLK3	CLK3|202140_s_at	1.3846	0.007176
COPS8	COPS8|202141_s_at	-0.568413	0.0483199
LY6E	LY6E|202145_at	1.05318	0.00600648
IFRD1	IFRD1|202146_at	1.4812	0.0012941
IFRD1	IFRD1|202147_s_at	2.19068	0.000801466
NEDD9	NEDD9|202149_at	0.802271	0.00702027
NEDD9	NEDD9|202150_s_at	1.04611	0.0112759
FARSA	FARSA|202159_at	0.933714	0.0132148
CNOT8	CNOT8|202162_s_at	-0.562157	0.00653867
CNOT8	CNOT8|202163_s_at	-1.12375	0.00314813
MMS19	MMS19|202167_s_at	0.501851	0.0232885
AK6	AK6|202168_at	0.724145	0.00894554
TAF9	TAF9|202168_at	0.724145	0.00894554
VEZF1	VEZF1|202171_at	0.857557	0.000928667
VEZF1	VEZF1|202172_at	1.3117	0.00646908
VEZF1	VEZF1|202173_s_at	0.711856	0.00341122
NUP133	NUP133|202184_s_at	-0.572286	0.023348
CSTF1	CSTF1|202190_at	1.03948	0.00284986
LIMK2	LIMK2|202193_at	1.0223	0.0189615
TMED5	TMED5|202195_s_at	-1.50339	0.00760406
SRPK1	SRPK1|202200_s_at	-0.507514	0.0207853
BLVRB	BLVRB|202201_at	0.656057	0.0164781
NFYC	NFYC|202215_s_at	1.58712	0.00190844
NFYC	NFYC|202216_x_at	1.39553	0.00423546
EP300	EP300|202221_s_at	0.843717	0.00636329
CRK	CRK|202226_s_at	1.10866	0.0114412
BRD8	BRD8|202227_s_at	-0.506401	0.00459409
NPTN	NPTN|202228_s_at	-0.684328	0.0240535
EIF3M	EIF3M|202232_s_at	0.729339	0.0299556
SLC16A1	SLC16A1|202236_s_at	0.50059	0.0227955
PARP4	PARP4|202239_at	0.693712	0.00386801
PSMB4	PSMB4|202244_at	-0.716825	0.00495177
PRPF3	PRPF3|202251_at	0.696164	0.00331003
SIPA1L1	SIPA1L1|202254_at	1.25274	0.0233714
VPS72	VPS72|202261_at	1.20342	0.00453507
DDAH2	DDAH2|202262_x_at	0.747395	0.0225681
CYB5R1	CYB5R1|202263_at	1.69589	0.000144985
TOMM40	TOMM40|202264_s_at	1.14173	0.0106714
G6PD	G6PD|202275_at	-1.38085	0.00135274
SHFM1	SHFM1|202276_at	-0.797252	0.0193966
SERPINF1	SERPINF1|202283_at	1.90512	0.048358
CDKN1A	CDKN1A|202284_s_at	0.5468	0.0145696
TACSTD2	TACSTD2|202286_s_at	-1.42477	0.00526071
PDAP1	PDAP1|202290_at	0.913405	0.00691194
MGP	MGP|202291_s_at	-1.98585	0.00230669
STAG1	STAG1|202293_at	0.867409	0.0159354
CTSH	CTSH|202295_s_at	-0.986621	0.00883187
RER1	RER1|202297_s_at	-0.952213	0.0108856
LAMTOR5	LAMTOR5|202299_s_at	-1.03885	0.0191184
LAMTOR5	LAMTOR5|202300_at	-0.927188	0.0174181
RSRC2	RSRC2|202301_s_at	1.62077	0.0037772
RSRC2	RSRC2|202302_s_at	1.07118	0.018347
TAP1	TAP1|202307_s_at	3.37493	0.00078963
COL1A1	COL1A1|202310_s_at	0.580344	0.0117754
PPP2R2A	PPP2R2A|202313_at	0.578166	0.02494
LRRD1	LRRD1|202314_at	-0.649596	0.0351615
CYP51A1	CYP51A1|202314_at	-0.649596	0.0351615
BCR	BCR|202315_s_at	-0.547053	0.0355702
UBE4B	UBE4B|202316_x_at	2.05054	0.0244504
UBE4B	UBE4B|202317_s_at	-2.39958	0.000679528
SENP6	SENP6|202319_at	1.42011	0.0180826
ATP5J	ATP5J|202325_s_at	-0.670099	0.0345104
UNG	UNG|202330_s_at	-1.22109	0.000654315
BCKDHA	BCKDHA|202331_at	-1.28105	0.00143217
PAM	PAM|202336_s_at	-1.88413	0.000706346
PMF1	PMF1|202337_at	0.55646	0.0363369
UBE2K	UBE2K|202347_s_at	-0.880731	0.011701
TOR1A	TOR1A|202349_at	-0.780506	0.0088544
LOC100506558	LOC100506558|202350_s_at	-0.506078	0.0430499
MATN2	MATN2|202350_s_at	-0.506078	0.0430499
GTF2F1	GTF2F1|202355_s_at	0.626431	0.0225587
GTF2F1	GTF2F1|202356_s_at	0.567141	0.00441383
CFB	CFB|202357_s_at	4.07692	0.00809077
MXI1	MXI1|202364_at	-1.21712	0.00261332
UNC119B	UNC119B|202365_at	-1.03965	0.010706
RAB3GAP2	RAB3GAP2|202374_s_at	1.03625	0.00107117
AURKAPS1	AURKAPS1|202374_s_at	1.03625	0.00107117
SERPINA3	SERPINA3|202376_at	-0.865323	0.00301083
NKTR	NKTR|202379_s_at	1.0454	0.0148338
NKTR	NKTR|202380_s_at	1.38877	0.00381534
TCOF1	TCOF1|202384_s_at	-0.631504	0.0227733
TCOF1	TCOF1|202385_s_at	-0.77135	0.013724
KIAA0430	KIAA0430|202386_s_at	-1.31826	0.00173248
BAG1	BAG1|202387_at	1.84402	0.000332049
KLF10	KLF10|202393_s_at	2.22218	8.10995e-05
ABCF3	ABCF3|202394_s_at	0.742064	0.0428641
NUTF2P4	NUTF2P4|202397_at	-0.690929	0.0204125
NUTF2	NUTF2|202397_at	-0.690929	0.0204125
AP3S2	AP3S2|202399_s_at	0.948655	0.00509251
C15orf38-AP3S2	C15orf38-AP3S2|202399_s_at	0.948655	0.00509251
IFI27	IFI27|202411_at	-2.96651	0.00169355
ERCC5	ERCC5|202414_at	0.655663	0.0356149
KEAP1	KEAP1|202417_at	-0.686509	0.0133813
DHX9	DHX9|202420_s_at	0.732214	0.00743113
IGSF3	IGSF3|202421_at	-1.00467	0.00985407
MAP2K2	MAP2K2|202424_at	0.723498	0.0385602
DBI	DBI|202428_x_at	-0.943394	0.00025158
IDS	IDS|202438_x_at	-1.89918	0.00221771
IDS	IDS|202439_s_at	-2.2165	0.00320823
ST5	ST5|202440_s_at	0.646935	0.0434381
AP3S1	AP3S1|202442_at	-0.922015	0.00299789
RXRA	RXRA|202449_s_at	-0.819721	0.0159681
GTF2H1	GTF2H1|202453_s_at	0.791869	0.0329688
ERBB3	ERBB3|202454_s_at	-1.29117	0.00211611
PRSS23	PRSS23|202458_at	-1.83494	0.000490423
EIF2B2	EIF2B2|202461_at	1.04687	0.00469751
CTNNAL1	CTNNAL1|202468_s_at	0.766476	0.0494738
CPSF6	CPSF6|202469_s_at	-1.20985	0.00845511
IDH3G	IDH3G|202471_s_at	1.44591	0.0052216
TRIB2	TRIB2|202478_at	-2.32321	0.00335822
DEDD	DEDD|202480_s_at	1.65851	0.0190475
MBD2	MBD2|202484_s_at	-0.856498	0.00117581
MBD2	MBD2|202485_s_at	-1.03426	0.0296758
H2AFV	H2AFV|202487_s_at	-0.730303	0.0318544
FXYD3	FXYD3|202488_s_at	0.83229	0.0124091
IKBKAP	IKBKAP|202491_s_at	-1.09145	0.00263999
PPIE	PPIE|202494_at	0.508893	0.0272042
TBCC	TBCC|202495_at	1.34845	0.00550147
DNAJB2	DNAJB2|202500_at	1.17499	0.0369676
MAPRE2	MAPRE2|202501_at	1.16709	0.00272878
KIAA0101	KIAA0101|202503_s_at	-0.873164	0.0020011
TRIM29	TRIM29|202504_at	2.2843	0.00402936
SSFA2	SSFA2|202506_at	-1.17558	0.000730161
TNFAIP2	TNFAIP2|202510_s_at	1.69762	0.0128745
ATG5	ATG5|202511_s_at	-0.516842	0.0315408
DLG1	DLG1|202514_at	0.883252	5.87638e-05
DLG1	DLG1|202516_s_at	1.16835	0.00461516
BCL7B	BCL7B|202518_at	1.24126	0.00522234
MLH1	MLH1|202520_s_at	0.597899	0.000689538
PRSS8	PRSS8|202525_at	1.39953	0.0218211
IRF1	IRF1|202531_at	3.24266	8.7674e-05
HMGCR	HMGCR|202539_s_at	-0.556614	0.00380108
HMGCR	HMGCR|202540_s_at	-0.796733	0.0418772
AIMP1	AIMP1|202542_s_at	0.894615	0.0180672
GMFB	GMFB|202543_s_at	-0.694013	0.0262621
GMFB	GMFB|202544_at	-0.974604	0.00247452
PRKCD	PRKCD|202545_at	1.48089	0.0149725
GSTM3	GSTM3|202554_s_at	-1.37732	0.00869474
HSPA13	HSPA13|202558_s_at	-1.31688	0.0162287
CHTOP	CHTOP|202559_x_at	1.02663	0.006237
CHTOP	CHTOP|202560_s_at	0.986752	0.00551273
C14orf1	C14orf1|202562_s_at	-1.06908	0.00546502
SVIL	SVIL|202566_s_at	1.19378	0.0216735
SNRPD3	SNRPD3|202567_at	-0.583112	0.000328261
MARK3	MARK3|202568_s_at	0.753864	0.0216238
MARK3	MARK3|202569_s_at	1.24929	0.00154814
CSNK1G2	CSNK1G2|202573_at	-1.53725	0.0445965
DDX19A	DDX19A|202578_s_at	0.981908	0.0405294
RANBP9	RANBP9|202583_s_at	1.25049	0.00293003
NFX1	NFX1|202584_at	0.891676	0.0296361
POLR2L	POLR2L|202586_at	1.65407	0.0231014
AK1	AK1|202587_s_at	0.971475	0.00392557
TYMS	TYMS|202589_at	-0.76663	0.00181932
SSBP1	SSBP1|202591_s_at	-0.585933	0.0190142
GDE1	GDE1|202593_s_at	0.683585	0.0198245
ENSA	ENSA|202596_at	-0.645525	0.00264917
HTATSF1	HTATSF1|202602_s_at	-0.588418	0.0486029
ADAM10	ADAM10|202603_at	-1.33145	0.00785248
ADAM10	ADAM10|202604_x_at	-1.29578	0.00934258
EPS8	EPS8|202609_at	0.575629	0.047357
PLOD2	PLOD2|202619_s_at	-0.505052	0.0277677
PLOD2	PLOD2|202620_s_at	-0.7136	0.0464296
IRF3	IRF3|202621_at	0.994055	0.00997961
ATXN2	ATXN2|202622_s_at	1.39774	0.0187235
LYN	LYN|202625_at	-0.80808	0.0105331
LYN	LYN|202626_s_at	-1.03402	0.0415736
SERPINE1	SERPINE1|202627_s_at	2.13387	0.0318967
OVCA2	OVCA2|202632_at	0.651348	0.0131242
DPH1	DPH1|202632_at	0.651348	0.0131242
ICAM1	ICAM1|202638_s_at	2.31563	0.0191923
TRRAP	TRRAP|202642_s_at	-0.618654	0.0121613
TNFAIP3	TNFAIP3|202643_s_at	5.43385	0.0254375
TNFAIP3	TNFAIP3|202644_s_at	4.44968	0.000560345
CSDE1	CSDE1|202646_s_at	-1.03607	0.00745781
RPS19	RPS19|202649_x_at	-0.566722	0.0235874
LPGAT1	LPGAT1|202651_at	-0.574553	0.0139189
MARCH7	MARCH7|202653_s_at	1.29224	6.25764e-05
MARCHF7	MARCHF7|202654_x_at	1.86835	0.00131666
MANF	MANF|202655_at	-0.586879	0.011891
SERTAD2	SERTAD2|202656_s_at	2.82026	0.00138641
SERTAD2	SERTAD2|202657_s_at	2.66124	0.00036667
PEX11B	PEX11B|202658_at	0.604673	0.0136365
ITPR2	ITPR2|202661_at	0.771799	0.0133084
ITPR2	ITPR2|202662_s_at	1.03232	0.0242876
EFNB2	EFNB2|202668_at	0.927945	0.00404057
ATF3	ATF3|202672_s_at	2.77145	0.00387352
NPC1	NPC1|202679_at	-1.10506	0.00604118
RBM15B	RBM15B|202689_at	-0.74221	0.0129096
SNRPD1	SNRPD1|202691_at	-0.990804	0.00115875
UBTF	UBTF|202692_s_at	1.12508	0.034147
STK17A	STK17A|202693_s_at	0.872795	0.016019
STK17A	STK17A|202694_at	1.96939	0.00288369
STK17A	STK17A|202695_s_at	1.14287	0.0342101
NUDT21	NUDT21|202697_at	-0.621025	0.00888034
TRIM26	TRIM26|202702_at	1.26378	0.0330828
DUSP11	DUSP11|202703_at	0.661514	0.00644558
HIST2H2BE	HIST2H2BE|202708_s_at	1.00766	0.000577775
FMOD	FMOD|202709_at	0.617274	0.0129664
BET1	BET1|202710_at	-0.58457	0.00722436
CKMT1B	CKMT1B|202712_s_at	1.157	0.0139586
CKMT1A	CKMT1A|202712_s_at	1.157	0.0139586
TES	TES|202719_s_at	1.27282	0.0243666
GFPT1	GFPT1|202722_s_at	-0.85581	0.018699
FOXO1	FOXO1|202723_s_at	1.44216	0.0422596
IFNGR1	IFNGR1|202727_s_at	0.918009	0.0395603
LTBP1	LTBP1|202728_s_at	-1.31998	0.034022
LTBP1	LTBP1|202729_s_at	-1.78908	0.00219464
PDCD4	PDCD4|202731_at	1.36634	0.0286464
MIR4680	MIR4680|202731_at	1.36634	0.0286464
LOC101927705	LOC101927705|202733_at	-0.65061	0.0257651
P4HA2	P4HA2|202733_at	-0.65061	0.0257651
EBP	EBP|202735_at	-1.35055	0.0160675
LSM4	LSM4|202736_s_at	1.23783	0.000425599
LSM4	LSM4|202737_s_at	0.592808	0.0105933
USP8	USP8|202745_at	0.575693	0.00338462
WRB	WRB|202749_at	-0.805684	0.0135287
R3HDM1	R3HDM1|202754_at	0.784294	0.0222335
NELFB	NELFB|202757_at	-0.922378	0.0107543
CASP3	CASP3|202763_at	1.04046	0.0362386
CCNG2	CCNG2|202769_at	-1.38441	0.00689845
PIEZO1	PIEZO1|202771_at	1.33417	0.00739729
HMGCL	HMGCL|202772_at	0.703379	0.0196252
DNTTIP2	DNTTIP2|202776_at	0.955836	0.00284897
ZMYM2	ZMYM2|202778_s_at	1.07808	0.0147127
NNT	NNT|202784_s_at	0.628875	0.0349016
INPP1	INPP1|202794_at	1.46017	0.0222101
SYNPO	SYNPO|202796_at	1.22766	0.0191244
SACM1L	SACM1L|202797_at	-0.58571	0.00924819
SEC24B	SEC24B|202798_at	1.00979	0.0202894
DBN1	DBN1|202806_at	0.751848	0.026197
INTS3	INTS3|202809_s_at	-0.51292	0.00112571
DRG1	DRG1|202810_at	0.817265	0.00235223
STAMBP	STAMBP|202811_at	0.883748	0.0254324
HEXIM1	HEXIM1|202814_s_at	0.819127	0.000817198
HEXIM1	HEXIM1|202815_s_at	0.846909	0.0466678
TCEB3	TCEB3|202818_s_at	0.545023	0.0335011
TCEB3	TCEB3|202819_s_at	0.512486	0.00549768
AHR	AHR|202820_at	0.801303	0.0118847
SERPINA1	SERPINA1|202833_s_at	-0.559356	0.029201
TRAFD1	TRAFD1|202837_at	1.95346	0.00764901
FUCA1	FUCA1|202838_at	-1.80961	0.00106774
TAF15	TAF15|202840_at	0.542607	0.0287114
OGFR	OGFR|202841_x_at	0.994054	0.0164365
RALBP1	RALBP1|202844_s_at	-1.08836	0.0197488
RALBP1	RALBP1|202845_s_at	-0.883606	0.0330655
PCK2	PCK2|202847_at	-0.502153	0.0349506
ABCD3	ABCD3|202850_at	-0.906167	0.0250499
HPRT1	HPRT1|202854_at	-0.573631	1.06301e-06
CNPY2	CNPY2|202857_at	-1.50337	0.00669351
CXCL8	CXCL8|202859_x_at	4.33442	0.0359399
DENND4B	DENND4B|202860_at	1.00793	0.0267914
PER1	PER1|202861_at	4.28883	0.000212727
MIR6883	MIR6883|202861_at	4.28883	0.000212727
SP100	SP100|202863_at	-0.792445	0.0348252
DNAJB12	DNAJB12|202867_s_at	1.18893	0.0194967
POP4	POP4|202868_s_at	-0.609985	0.0488656
OAS1	OAS1|202869_at	-1.33065	0.00929049
CDC20	CDC20|202870_s_at	0.807314	0.0243443
TRAF4	TRAF4|202871_at	1.98231	0.000574759
ATP6V1C1	ATP6V1C1|202872_at	-1.42051	0.0112129
ATP6V1C1	ATP6V1C1|202874_s_at	-1.03005	0.0138169
PBX2	PBX2|202876_s_at	-0.62859	0.0249122
DDIT4	DDIT4|202887_s_at	-0.611465	0.0241715
MAP7	MAP7|202889_x_at	1.1351	0.00718198
NIT1	NIT1|202891_at	0.743772	0.00610738
EPHB4	EPHB4|202894_at	-1.20563	0.0139945
CTSS	CTSS|202901_x_at	3.95757	0.0272016
CTSS	CTSS|202902_s_at	4.00438	0.0144334
LSM5	LSM5|202904_s_at	-0.901331	0.00476627
ADM	ADM|202912_at	1.85875	0.0108209
FAM20B	FAM20B|202915_s_at	-1.07402	0.0378179
FAM20B	FAM20B|202916_s_at	-1.84502	0.00401294
S100A8	S100A8|202917_s_at	3.19404	0.00919992
MOB4	MOB4|202919_at	1.07038	0.00633265
ANK2	ANK2|202920_at	-1.10323	0.0156647
NBAS	NBAS|202926_at	1.25412	0.00438893
PHF1	PHF1|202928_s_at	1.3487	0.0250405
HK2	HK2|202934_at	-1.22254	0.00879447
SOX9	SOX9|202935_s_at	2.46833	0.00315792
SOX9	SOX9|202936_s_at	2.56053	0.00202737
RRP7A	RRP7A|202937_x_at	0.644023	0.0182039
NAGA	NAGA|202943_s_at	-0.94707	0.0366343
IL1R1	IL1R1|202948_at	-1.47661	0.0474325
CRYZ	CRYZ|202950_at	-1.22869	0.00489882
UBE2C	UBE2C|202954_at	0.598148	0.0182796
ARFGEF1	ARFGEF1|202955_s_at	1.29089	0.00118639
ARFGEF1	ARFGEF1|202956_at	0.873097	0.000211702
GSTA4	GSTA4|202967_at	-1.15275	0.0347413
DYRK2	DYRK2|202969_at	0.88505	0.00259793
DYRK2	DYRK2|202971_s_at	0.56405	0.0190733
RHOBTB3	RHOBTB3|202975_s_at	-1.83252	0.000304946
RHOBTB3	RHOBTB3|202976_s_at	-2.16188	0.000759284
CREBZF	CREBZF|202977_s_at	1.08844	0.0402789
CREBZF	CREBZF|202978_s_at	-0.81426	0.0396237
SIAH1	SIAH1|202980_s_at	0.639612	0.0136018
ACOT2	ACOT2|202982_s_at	1.12427	0.00517844
ACOT1	ACOT1|202982_s_at	1.12427	0.00517844
POLD4	POLD4|202996_at	1.35479	0.00492991
LOXL2	LOXL2|202997_s_at	-0.598628	0.0412767
INPP5A	INPP5A|203006_at	-0.959134	0.0139387
TXNDC9	TXNDC9|203008_x_at	0.639943	0.0274421
BCAM	BCAM|203009_at	2.59726	0.032246
STAT5A	STAT5A|203010_at	2.83817	0.00265357
IMPA1	IMPA1|203011_at	0.834733	0.0237207
RPL23A	RPL23A|203012_x_at	-0.675294	0.0152381
ECD	ECD|203013_at	1.04265	0.00271149
SSX2IP	SSX2IP|203018_s_at	0.781438	0.0180716
SSX2IP	SSX2IP|203019_x_at	0.967564	0.0134792
SLPI	SLPI|203021_at	-0.507096	0.0374365
C5orf15	C5orf15|203024_s_at	-0.958789	0.000102997
NAA10	NAA10|203025_at	0.536646	0.0290063
ZBTB5	ZBTB5|203026_at	0.540631	0.0461349
PTPRN2	PTPRN2|203029_s_at	-1.71276	0.0478802
FH	FH|203032_s_at	1.69009	0.00330142
RPL27A	RPL27A|203034_s_at	-0.655738	0.00738775
SNORA45A	SNORA45A|203034_s_at	-0.655738	0.00738775
PTPRK	PTPRK|203038_at	-0.945918	0.014613
LAMP2	LAMP2|203042_at	-0.930643	0.0182164
NINJ1	NINJ1|203045_at	2.29022	0.00356026
TIMELESS	TIMELESS|203046_s_at	-1.52951	0.00370084
BAHD1	BAHD1|203051_at	0.942877	0.0294657
TCTA	TCTA|203054_s_at	0.58187	0.0181667
PAPSS2	PAPSS2|203058_s_at	-2.9792	0.00212087
PAPSS2	PAPSS2|203059_s_at	-2.43854	0.00656636
PAPSS2	PAPSS2|203060_s_at	-3.75826	0.000749309
MDC1	MDC1|203061_s_at	1.4071	0.00552147
MDC1	MDC1|203062_s_at	0.960916	0.00521312
PPM1F	PPM1F|203063_at	-1.25624	0.0230324
CAV1	CAV1|203065_s_at	-2.01287	0.0103191
SEMA3B	SEMA3B|203071_at	0.763652	0.00580928
MIR6872	MIR6872|203071_at	0.763652	0.00580928
CUL2	CUL2|203078_at	1.07728	0.0443551
BMS1	BMS1|203082_at	0.872305	0.0168261
SDF2	SDF2|203090_at	-0.849519	0.0166484
TIMM44	TIMM44|203093_s_at	1.71883	0.0265513
MAD2L1BP	MAD2L1BP|203094_at	1.58473	0.00025365
MTIF2	MTIF2|203095_at	-1.17249	0.000490846
CDYL	CDYL|203098_at	0.686085	0.00230107
CDYL	CDYL|203100_s_at	0.966848	0.00567816
SNORA64	SNORA64|203107_x_at	-0.712455	0.00917646
RPS2	RPS2|203107_x_at	-0.712455	0.00917646
GPRC5A	GPRC5A|203108_at	-1.95582	9.00813e-05
UBE2M	UBE2M|203109_at	1.68018	0.00608904
PTK2B	PTK2B|203111_s_at	0.89107	0.00826178
SSSCA1	SSSCA1|203114_at	1.11861	0.0376496
SPTLC2	SPTLC2|203127_s_at	-1.25091	0.00264632
SEC61B	SEC61B|203133_at	-0.851221	0.00307286
TBP	TBP|203135_at	0.961828	0.000898504
BCL6	BCL6|203140_at	1.00461	0.0228202
TRIM14	TRIM14|203147_s_at	-0.527607	0.042466
RABEPK	RABEPK|203150_at	-0.662894	0.0287089
SETDB1	SETDB1|203155_at	1.54705	0.00510314
RNF8	RNF8|203160_s_at	0.567413	0.0344267
KATNB1	KATNB1|203162_s_at	-1.67127	0.0338086
SLC33A1	SLC33A1|203164_at	-1.04834	0.0122696
SLC33A1	SLC33A1|203165_s_at	-0.798166	0.00684127
ATF6B	ATF6B|203168_at	-0.883548	0.0394829
RRP8	RRP8|203171_s_at	1.46484	0.0414025
ARFRP1	ARFRP1|203174_s_at	1.73773	0.024186
SRPK2	SRPK2|203181_x_at	0.885352	0.00213626
SRPK2	SRPK2|203182_s_at	1.12039	0.0177367
NDUFS8	NDUFS8|203189_s_at	0.601965	0.0358924
MIR7113	MIR7113|203189_s_at	0.601965	0.0358924
MIR4691	MIR4691|203189_s_at	0.601965	0.0358924
ABCB6	ABCB6|203192_at	-1.03037	0.0129186
NUP98	NUP98|203194_s_at	1.82616	0.0147881
ABCC4	ABCC4|203196_at	-0.548456	0.00743093
RFC5	RFC5|203210_s_at	0.949708	0.011518
MTMR2	MTMR2|203212_s_at	-0.546949	0.0275919
APRT	APRT|203219_s_at	0.544459	0.0142774
TLE1	TLE1|203221_at	-1.16838	0.00342123
TLE1	TLE1|203222_s_at	-0.695391	0.0445903
TSPAN31	TSPAN31|203227_s_at	-0.656299	0.0385732
PAFAH1B3	PAFAH1B3|203228_at	0.585059	0.0234446
ATXN1	ATXN1|203231_s_at	-1.9411	0.0073186
ATXN1	ATXN1|203232_s_at	-1.97718	0.0302004
UVRAG	UVRAG|203241_at	2.20669	0.019418
PDLIM5	PDLIM5|203242_s_at	0.605633	0.0492751
LINC00094	LINC00094|203245_s_at	-1.67785	0.00783143
ZNF24	ZNF24|203247_s_at	0.853794	0.00937079
ZNF24	ZNF24|203248_at	1.11149	0.034631
SCAF8	SCAF8|203250_at	0.764916	0.0213491
CDK2AP2	CDK2AP2|203252_at	1.28536	0.00273227
PPIP5K2	PPIP5K2|203253_s_at	-1.2775	0.0137045
FBXO11	FBXO11|203255_at	-0.889885	0.0049697
C11orf49	C11orf49|203257_s_at	-0.608308	0.0091184
FAM50A	FAM50A|203262_s_at	0.932334	0.00305081
DRG2	DRG2|203267_s_at	1.62175	0.000319001
DRG2	DRG2|203268_s_at	0.94527	0.0429108
TUSC2	TUSC2|203273_s_at	-1.22574	0.0348224
F8A3	F8A3|203274_at	0.577917	0.0490548
F8A2	F8A2|203274_at	0.577917	0.0490548
F8A1	F8A1|203274_at	0.577917	0.0490548
LMNB1	LMNB1|203276_at	-1.27108	0.0180819
PHF21A	PHF21A|203278_s_at	1.87795	0.00491332
RNF44	RNF44|203286_at	-0.628439	0.00428753
LAD1	LAD1|203287_at	0.637673	0.0427188
CNOT4	CNOT4|203291_at	1.27959	0.00435203
VPS11	VPS11|203292_s_at	-0.606552	0.0080417
ATP1A2	ATP1A2|203295_s_at	-0.71487	0.000693801
DYNLT3	DYNLT3|203303_at	-0.964806	0.0145288
BAMBI	BAMBI|203304_at	-1.15437	0.0125449
GNL1	GNL1|203307_at	0.960783	0.0235812
HPS1	HPS1|203309_s_at	-0.973771	0.0338582
ARF6	ARF6|203311_s_at	2.02096	0.00396291
ARF6	ARF6|203312_x_at	0.623111	0.0143798
TGIF1	TGIF1|203313_s_at	0.88681	0.00161156
GTPBP6	GTPBP6|203314_at	-0.647454	0.0241581
SNRPE	SNRPE|203316_s_at	-0.747898	0.0083719
SH2B3	SH2B3|203320_at	0.733401	0.00430202
ADNP2	ADNP2|203321_s_at	0.662395	0.0454087
ADNP2	ADNP2|203322_at	0.593184	0.00707026
CAV2	CAV2|203323_at	-2.02938	0.00950547
CAV2	CAV2|203324_s_at	-2.13263	0.000274944
COL5A1	COL5A1|203325_s_at	-0.995809	0.0249432
ITGB1BP1	ITGB1BP1|203336_s_at	-1.13901	0.000604183
ITGB1BP1	ITGB1BP1|203337_x_at	-1.58986	0.00182992
SLC25A12	SLC25A12|203339_at	1.04366	0.02508
SLC25A12	SLC25A12|203340_s_at	1.29805	0.0111615
CEBPZ	CEBPZ|203341_at	0.7116	0.0101956
TIMM17B	TIMM17B|203342_at	1.11459	0.0105417
UGDH	UGDH|203343_at	-1.39459	0.00441004
ORC4	ORC4|203351_s_at	0.809516	0.030896
ORC4	ORC4|203352_at	1.18329	0.00780797
CAPN7	CAPN7|203356_at	0.545138	0.00812096
CAPN7	CAPN7|203357_s_at	1.5218	0.0228956
EZH2	EZH2|203358_s_at	1.12519	0.00231858
MYCBP	MYCBP|203359_s_at	-1.40725	0.00933569
GJA9-MYCBP	GJA9-MYCBP|203359_s_at	-1.40725	0.00933569
MYCBP	MYCBP|203360_s_at	-1.15183	0.00686346
GJA9	GJA9|203360_s_at	-1.15183	0.00686346
GJA9-MYCBP	GJA9-MYCBP|203360_s_at	-1.15183	0.00686346
MAD2L1	MAD2L1|203362_s_at	-1.1522	0.00139213
ATG13	ATG13|203364_s_at	-0.554983	0.0375127
CRELD1	CRELD1|203368_at	0.71889	0.0127812
SOCS2	SOCS2|203372_s_at	1.02729	0.000327549
TPP2	TPP2|203375_s_at	0.584737	0.0260981
CDC40	CDC40|203377_s_at	0.588381	0.00035864
PCF11	PCF11|203378_at	0.891496	0.039587
RPS6KA1	RPS6KA1|203379_at	1.84037	0.0059614
SRSF5	SRSF5|203380_x_at	-0.715787	0.00561758
APOE	APOE|203382_s_at	3.41273	0.0178248
TBC1D4	TBC1D4|203386_at	-0.690626	0.00575919
ARRB2	ARRB2|203388_at	1.57087	0.0444785
FKBP2	FKBP2|203391_at	-1.01419	0.010506
HES1	HES1|203394_s_at	1.97556	0.0134987
HES1	HES1|203395_s_at	2.1112	0.000739243
GALNT3	GALNT3|203397_s_at	-1.00463	0.0123282
TF	TF|203400_s_at	1.70915	0.0329593
PRPS2	PRPS2|203401_at	-2.04685	0.00397914
ARMCX2	ARMCX2|203404_at	1.10053	0.0316356
PSMG1	PSMG1|203405_at	0.768438	0.00165006
PPL	PPL|203407_at	0.979862	0.00195597
DDB2	DDB2|203409_at	1.86187	0.00414628
MMD	MMD|203414_at	1.82325	0.00206097
IGFBP5	IGFBP5|203424_s_at	-3.55419	0.000409367
IGFBP5	IGFBP5|203426_s_at	-2.23361	0.00946166
ASF1A	ASF1A|203427_at	0.970887	0.0169835
ASF1A	ASF1A|203428_s_at	0.739319	0.0220313
TMPO	TMPO|203432_at	0.500625	0.0195632
RPP30	RPP30|203436_at	0.608163	0.00319084
TMEM11	TMEM11|203437_at	0.959838	0.00290141
STC2	STC2|203438_at	-1.79674	0.000873671
PSMD5	PSMD5|203447_at	0.504064	0.0237298
B3GAT3	B3GAT3|203452_at	0.972145	0.0194519
SCNN1A	SCNN1A|203453_at	1.42923	0.0313915
SAT1	SAT1|203455_s_at	0.841256	0.0252918
PSEN1	PSEN1|203460_s_at	-0.868248	0.0269778
CDK10	CDK10|203468_at	-0.795157	0.0398696
CDK10	CDK10|203469_s_at	0.738654	0.0201354
PLEK	PLEK|203471_s_at	3.03193	0.0358485
TPBG	TPBG|203476_at	-0.81791	0.00478874
LPHN1	LPHN1|203488_at	0.792362	0.00161521
ELF4	ELF4|203490_at	0.502736	0.044376
CEP57	CEP57|203492_x_at	1.0495	0.013695
CEP57	CEP57|203493_s_at	1.04258	0.0399746
EPHA2	EPHA2|203499_at	1.74747	0.00140192
SPG11	SPG11|203513_at	1.05523	0.000148499
PMVK	PMVK|203515_s_at	-0.780376	0.00886274
MTX2	MTX2|203517_at	0.581469	0.00292279
LYST	LYST|203518_at	0.93854	0.0269804
UPF2	UPF2|203519_s_at	1.25634	0.000571406
ZNF318	ZNF318|203521_s_at	0.525325	0.0224802
S100A9	S100A9|203535_at	3.76721	0.0177564
CIAO1	CIAO1|203536_s_at	0.781724	0.0176741
PRPSAP2	PRPSAP2|203537_at	0.66716	0.0113766
ALG8	ALG8|203545_at	-0.544963	0.0352584
FAM189B	FAM189B|203550_s_at	-3.34404	0.0183766
MAP4K5	MAP4K5|203552_at	1.12957	0.0096403
MAP4K5	MAP4K5|203553_s_at	1.17842	0.0085408
PTTG1	PTTG1|203554_x_at	-0.566611	0.0267173
ZHX2	ZHX2|203556_at	1.32827	0.0159896
PCBD1	PCBD1|203557_s_at	-0.55882	0.0023475
GGH	GGH|203560_at	-1.02375	0.045251
AFAP1	AFAP1|203563_at	-0.653738	0.00593548
AGL	AGL|203566_s_at	0.56959	0.0294338
TRIM38	TRIM38|203567_s_at	1.24387	0.0135874
OFD1	OFD1|203569_s_at	0.837613	0.0156646
LOXL1	LOXL1|203570_at	-1.52511	0.00226216
ADIRF	ADIRF|203571_s_at	0.947916	0.0360523
GTF2H4	GTF2H4|203577_at	-0.536622	0.0400975
SPHAR	SPHAR|203581_at	-0.76802	0.0128825
RAB4A	RAB4A|203581_at	-0.76802	0.0128825
ZNF185	ZNF185|203585_at	-0.625287	0.0289815
FSTL3	FSTL3|203592_s_at	1.56082	0.0303416
RTCA	RTCA|203594_at	-0.701916	0.00123366
IFIT5	IFIT5|203596_s_at	1.18745	0.0143597
WBP4	WBP4|203597_s_at	0.631685	0.0233824
WBP4	WBP4|203598_s_at	0.751022	0.0153366
WBP4	WBP4|203599_s_at	1.49931	0.0220596
FAM193A	FAM193A|203600_s_at	1.44666	0.00224033
ZBTB17	ZBTB17|203602_s_at	1.01804	0.00855402
NDUFS6	NDUFS6|203606_at	-0.653654	0.0249934
INPP5F	INPP5F|203607_at	1.03752	0.000498699
ALDH5A1	ALDH5A1|203608_at	-1.22986	0.0132496
TERF2	TERF2|203611_at	1.83704	0.000281143
NDUFB6	NDUFB6|203613_s_at	-0.786657	0.00730024
SULT1A1	SULT1A1|203615_x_at	0.781311	0.0328316
FCHSD2	FCHSD2|203620_s_at	0.649823	0.019574
NDUFB5	NDUFB5|203621_at	-0.509918	0.0154219
SKP2	SKP2|203625_x_at	-1.97862	0.00679298
IGF1R	IGF1R|203627_at	-0.832328	0.0344015
IGF1R	IGF1R|203628_at	-1.19237	0.00546924
COG5	COG5|203629_s_at	0.867614	0.00978345
DSCR3	DSCR3|203635_at	1.36721	0.0207128
FGFR2	FGFR2|203638_s_at	0.504021	0.0489975
ERF	ERF|203643_at	2.64433	0.0101404
MON1B	MON1B|203644_s_at	-1.18627	0.0197445
FDX1	FDX1|203647_s_at	-0.862386	0.00566526
TATDN2	TATDN2|203648_at	-0.633743	0.0312213
MAP3K11	MAP3K11|203652_at	-0.790446	0.0435959
XRCC1	XRCC1|203655_at	1.1257	0.0350076
SLC25A20	SLC25A20|203658_at	0.785871	0.0109991
TRIM13	TRIM13|203659_s_at	1.09675	0.0142677
PCNT	PCNT|203660_s_at	1.21606	0.000733755
MAN2C1	MAN2C1|203668_at	0.911632	0.0272565
TG	TG|203673_at	-3.32942	0.019915
NUCB2	NUCB2|203675_at	-0.611647	0.00953075
TARBP2	TARBP2|203677_s_at	0.54002	0.00353426
IVD	IVD|203681_at	-1.40409	0.00481684
IVD	IVD|203682_s_at	-0.742314	0.0192286
RFC2	RFC2|203696_s_at	0.864059	0.00624006
DIO2	DIO2|203700_s_at	-1.82905	0.0157435
PHKG2	PHKG2|203709_at	1.47996	0.0132432
KIAA0020	KIAA0020|203712_at	0.722617	0.0253657
TBCE	TBCE|203714_s_at	0.571929	0.0270866
TBCE	TBCE|203715_at	1.0528	0.00510038
ERCC1	ERCC1|203720_s_at	0.756145	0.0248984
GADD45A	GADD45A|203725_at	3.2566	0.000350711
LAMA3	LAMA3|203726_s_at	0.666527	0.0132827
ZKSCAN5	ZKSCAN5|203730_s_at	0.895566	0.0264354
TRIP4	TRIP4|203732_at	0.583915	0.0201832
DEXI	DEXI|203733_at	-1.19157	0.000759877
FOXJ2	FOXJ2|203734_at	0.732551	0.00835751
PPFIBP1	PPFIBP1|203736_s_at	1.63202	0.0422961
PPRC1	PPRC1|203737_s_at	0.959643	0.0116498
C5orf22	C5orf22|203738_at	0.543444	0.0319519
TDG	TDG|203742_s_at	-1.14002	0.0343284
LOC732360	LOC732360|203742_s_at	-1.14002	0.0343284
TDG	TDG|203743_s_at	-0.612393	0.00875888
HMGB3	HMGB3|203744_at	-0.965442	0.0174992
RARA	RARA|203749_s_at	1.2234	0.00841079
CEACAM6	CEACAM6|203757_s_at	-2.62486	0.00131985
ST3GAL4	ST3GAL4|203759_at	1.88005	0.00239318
GCA	GCA|203765_at	-1.33272	0.04932
BLVRA	BLVRA|203771_s_at	0.898278	0.0271779
SLC25A13	SLC25A13|203775_at	0.675532	0.0114572
GPKOW	GPKOW|203776_at	0.85014	0.0145021
MPZL2	MPZL2|203780_at	-1.56581	0.0279608
MRPL33	MRPL33|203781_at	-0.567666	0.0289714
DDX28	DDX28|203784_s_at	3.26789	0.00110592
SSBP2	SSBP2|203787_at	1.71416	0.00101284
SEMA3C	SEMA3C|203788_s_at	-0.930027	0.0129048
SEMA3C	SEMA3C|203789_s_at	-0.638742	0.00330938
DMXL1	DMXL1|203791_at	0.941588	0.0367177
VSNL1	VSNL1|203798_s_at	-3.7299	0.0120622
LY75-CD302	LY75-CD302|203799_at	-0.764613	0.000275258
LY75	LY75|203799_at	-0.764613	0.000275258
CD302	CD302|203799_at	-0.764613	0.000275258
MRPS14	MRPS14|203800_s_at	-0.541408	0.00994501
NSUN5	NSUN5|203802_x_at	1.63077	6.23971e-05
PCYOX1	PCYOX1|203803_at	-1.28377	0.00526824
DNAJB4	DNAJB4|203810_at	1.08294	0.0290809
DNAJB4	DNAJB4|203811_s_at	1.98046	0.00338962
SLIT3	SLIT3|203813_s_at	1.70499	0.0382324
DGUOK	DGUOK|203816_at	0.516855	0.000503765
BRD3	BRD3|203825_at	-0.613576	0.0257863
WIPI1	WIPI1|203827_at	-1.97825	0.00553874
IL32	IL32|203828_s_at	4.2128	0.0149956
SNRPF	SNRPF|203832_at	-0.668601	0.0295393
TGOLN2	TGOLN2|203833_s_at	-0.921045	0.0105669
TGOLN2	TGOLN2|203834_s_at	-0.927662	0.00232534
MAP3K5	MAP3K5|203836_s_at	0.553686	0.0385995
TNK2	TNK2|203838_s_at	3.46644	0.0355513
KAT2B	KAT2B|203845_at	1.57063	0.00445807
TRIM32	TRIM32|203846_at	0.898758	0.0209332
AKAP8	AKAP8|203848_at	0.705576	0.00310713
SMN2	SMN2|203852_s_at	0.806715	0.0479769
SMN1	SMN1|203852_s_at	0.806715	0.0479769
MIR7110	MIR7110|203857_s_at	-0.818872	0.0109894
PDIA5	PDIA5|203857_s_at	-0.818872	0.0109894
PCCA	PCCA|203860_at	1.36173	0.00408227
ADARB1	ADARB1|203865_s_at	-1.27724	0.024678
MMP11	MMP11|203876_s_at	-3.35016	0.0301761
THBD	THBD|203887_s_at	-1.15308	0.0084473
THBD	THBD|203888_at	-0.873542	0.0449964
DAPK3	DAPK3|203890_s_at	1.93989	0.00674565
MIR637	MIR637|203890_s_at	1.93989	0.00674565
TUBG2	TUBG2|203894_at	1.4118	0.00298513
PLCB4	PLCB4|203895_at	1.00864	0.00342544
PLCB4	PLCB4|203896_s_at	1.14879	0.00343875
CRCP	CRCP|203898_at	0.653549	0.0277167
CRCP	CRCP|203899_s_at	1.07704	0.0153887
CD82	CD82|203904_x_at	1.75809	0.00438906
ARHGAP29	ARHGAP29|203910_at	0.540316	0.0277873
RAP1GAP	RAP1GAP|203911_at	1.19011	0.0343862
DNASE1L1	DNASE1L1|203912_s_at	-1.07025	0.0292556
CXADR	CXADR|203917_at	1.98899	0.00206019
PCDH1	PCDH1|203918_at	0.829408	0.0451451
NR1H3	NR1H3|203920_at	1.33372	0.00422579
NFKBIE	NFKBIE|203927_at	3.54524	0.00111867
MAPT	MAPT|203930_s_at	1.49203	0.0367892
MRPL12	MRPL12|203931_s_at	1.19933	0.00381224
NT5E	NT5E|203939_at	-2.273	0.0109898
MARK2	MARK2|203942_s_at	2.15608	0.00433894
BTN2A1	BTN2A1|203944_x_at	1.63438	0.0167279
ARG2	ARG2|203946_s_at	2.55787	0.0242296
CLDN3	CLDN3|203953_s_at	1.62018	0.00259503
CLDN3	CLDN3|203954_x_at	2.03983	0.0134353
MORC2	MORC2|203956_at	-1.17634	0.000109711
ZBTB40	ZBTB40|203958_s_at	1.48293	0.00991382
CA12	CA12|203963_at	-0.536493	0.0143706
PPM1A	PPM1A|203966_s_at	-0.681417	0.0237625
SLC31A1	SLC31A1|203971_at	-1.89456	0.00416744
CEBPD	CEBPD|203973_s_at	1.36822	0.00906156
HDHD1	HDHD1|203974_at	-0.804329	0.00445382
TAZ	TAZ|203977_at	3.63434	0.000458779
NUBP1	NUBP1|203978_at	0.553611	0.00226926
CASP9	CASP9|203984_s_at	0.861716	0.00987522
FUT8	FUT8|203988_s_at	-1.50458	0.00812887
KDM6A	KDM6A|203991_s_at	1.27265	0.00588566
KDM6A	KDM6A|203992_s_at	1.19286	0.00683269
C21orf2	C21orf2|203994_s_at	-1.01187	0.0221656
PTPN3	PTPN3|203997_at	0.574457	0.0129708
GNB5	GNB5|204000_at	-0.959041	0.0139244
SNAPC3	SNAPC3|204001_at	1.04943	0.000711161
NUPL2	NUPL2|204003_s_at	0.886415	0.00522279
KDELR3	KDELR3|204017_at	-1.45236	0.00829026
OSGIN2	OSGIN2|204024_at	1.45142	0.0036995
CELSR2	CELSR2|204029_at	-1.39369	0.00049765
PCBP2	PCBP2|204031_s_at	-0.738846	0.0260541
TRIP13	TRIP13|204033_at	-1.83228	0.00141237
SCG2	SCG2|204035_at	1.71836	0.00935794
CEBPA	CEBPA|204039_at	1.52735	0.0193536
QPRT	QPRT|204044_at	-0.936043	0.020395
PTEN	PTEN|204053_x_at	-0.629652	0.00954845
CTAGE5	CTAGE5|204055_s_at	-1.27142	0.00998447
IRF8	IRF8|204057_at	0.951894	0.0168055
PRKY	PRKY|204060_s_at	-1.45348	0.00396638
PRKX	PRKX|204060_s_at	-1.45348	0.00396638
PRKX	PRKX|204061_at	-1.8243	0.00570742
ULK2	ULK2|204062_s_at	-0.8257	0.00749322
THOC1	THOC1|204064_at	1.02856	0.0104479
AGAP1	AGAP1|204066_s_at	-1.43887	0.00084802
MEIS1	MEIS1|204069_at	0.517629	0.0246505
TOPORS	TOPORS|204071_s_at	0.666385	0.0128158
FRY	FRY|204072_s_at	2.86258	0.0488152
ENTPD4	ENTPD4|204076_at	-1.02626	0.00116721
ENTPD4	ENTPD4|204077_x_at	-1.16558	0.0146143
LEPREL4	LEPREL4|204078_at	-0.832985	0.0223162
TPST2	TPST2|204079_at	-1.3193	0.024952
TOE1	TOE1|204080_at	0.893028	0.000486054
CLN5	CLN5|204085_s_at	0.883517	0.0259337
P2RX4	P2RX4|204088_at	2.38153	0.00439628
STK19	STK19|204090_at	0.833314	0.03925
CCNH	CCNH|204093_at	0.951683	0.00852368
EEF2	EEF2|204102_s_at	-0.609338	0.00932625
CCL4	CCL4|204103_at	1.06752	0.0264611
NRCAM	NRCAM|204105_s_at	-1.1388	0.00183026
GADD45G	GADD45G|204121_at	3.11931	0.00104799
LIG3	LIG3|204123_at	-1.66231	0.0153031
CDC45	CDC45|204126_s_at	0.974422	0.000201186
RFC3	RFC3|204127_at	-0.745355	0.0173977
FOXO3B	FOXO3B|204132_s_at	1.2404	0.0013598
FOXO3	FOXO3|204132_s_at	1.2404	0.0013598
PDE2A	PDE2A|204134_at	-2.32919	0.0200398
GPR137B	GPR137B|204137_at	-1.27882	0.00746929
TPST1	TPST1|204140_at	1.20267	0.0311602
TUBB2A	TUBB2A|204141_at	1.58074	0.00038948
LOC100289097	LOC100289097|204145_at	0.62591	0.0295173
FRG1	FRG1|204145_at	0.62591	0.0295173
LOC101930278	LOC101930278|204145_at	0.62591	0.0295173
LOC101930531	LOC101930531|204145_at	0.62591	0.0295173
POMZP3	POMZP3|204148_s_at	1.26879	0.0141314
ZP3	ZP3|204148_s_at	1.26879	0.0141314
STAB1	STAB1|204150_at	-3.43429	0.0286533
AKR1C1	AKR1C1|204151_x_at	-0.535535	0.0133519
SIK3	SIK3|204155_s_at	1.35001	0.0308082
SIK3	SIK3|204157_s_at	1.29127	0.00108504
CDKN2C	CDKN2C|204159_at	-1.51803	0.00918343
WASF1	WASF1|204165_at	1.79384	0.00811723
BTD	BTD|204167_at	-2.18267	0.00724775
CKS2	CKS2|204170_s_at	-1.01301	0.0254068
ZNF593	ZNF593|204175_at	1.18515	0.0151803
KLHL20	KLHL20|204177_s_at	0.937406	0.00715285
RBM14	RBM14|204178_s_at	0.999305	0.0049413
ZBTB43	ZBTB43|204181_s_at	0.842716	0.0307982
GMPR	GMPR|204187_at	4.63187	0.010657
CD37	CD37|204192_at	2.17262	0.000893587
CHKB	CHKB|204193_at	1.14739	0.0246482
PTPN13	PTPN13|204201_s_at	0.621414	0.0134495
EIF2AK2	EIF2AK2|204211_x_at	-0.873257	0.00578902
ACOT8	ACOT8|204212_at	0.850042	0.014473
RAB32	RAB32|204214_s_at	0.931263	6.45139e-05
TMEM243	TMEM243|204215_at	-1.23337	0.00322722
ZC3H14	ZC3H14|204216_s_at	1.57819	0.000428426
ANAPC15	ANAPC15|204218_at	-0.599998	0.00377036
GCH1	GCH1|204224_s_at	0.75481	0.0245806
CHKA	CHKA|204233_s_at	1.46997	0.000820172
ZNF195	ZNF195|204234_s_at	0.757269	0.0229532
SMC2	SMC2|204240_s_at	-0.8105	0.0128393
ACOX3	ACOX3|204241_at	-0.505176	0.0301589
RLF	RLF|204243_at	0.944441	0.00914554
CEP164	CEP164|204251_s_at	0.523648	0.00126848
VDR	VDR|204253_s_at	3.63747	0.0422956
VDR	VDR|204254_s_at	1.108	0.00709917
VDR	VDR|204255_s_at	1.22269	0.00246741
CHKA	CHKA|204266_s_at	2.17977	0.00422333
PKMYT1	PKMYT1|204267_x_at	1.00117	0.0132881
TK2	TK2|204277_s_at	3.60493	0.0174645
PSMB9	PSMB9|204279_at	4.45125	0.000590147
PPP1R3C	PPP1R3C|204284_at	1.02849	0.0108469
ALDH6A1	ALDH6A1|204290_s_at	-1.13756	0.0040851
LOX	LOX|204298_s_at	1.92487	0.0467844
CD151	CD151|204306_s_at	1.11352	0.00253905
CYP11A1	CYP11A1|204309_at	3.94472	0.0179704
CREB1	CREB1|204312_x_at	0.752505	0.00687186
RGS10	RGS10|204316_at	0.638349	0.0306337
RGS10	RGS10|204319_s_at	1.45792	0.000578175
MT1X	MT1X|204326_x_at	0.775146	0.0286137
TMC6	TMC6|204328_at	1.13081	0.0263993
AGA	AGA|204333_s_at	0.561165	0.0414155
CCDC94	CCDC94|204335_at	0.823134	0.0205018
RGS19	RGS19|204336_s_at	-0.735532	0.00602954
TRIM16	TRIM16|204341_at	2.67301	0.00416123
RASSF1	RASSF1|204346_s_at	2.1819	0.00201958
S100P	S100P|204351_at	-2.55433	0.00134179
SKAP2	SKAP2|204362_at	-0.649185	0.0139244
GTF3C2	GTF3C2|204366_s_at	-0.665467	0.0181774
PIK3CA	PIK3CA|204369_at	-0.76045	0.00442199
CLP1	CLP1|204370_at	-0.75818	0.0350915
GALK1	GALK1|204374_s_at	1.68376	0.00668834
MRPL57	MRPL57|204386_s_at	-0.573476	0.0208289
MRPL57	MRPL57|204387_x_at	-1.80974	0.0042211
TRIM24	TRIM24|204391_x_at	0.902785	0.00285596
ACPP	ACPP|204393_s_at	-0.693289	0.0121146
GRK5	GRK5|204396_s_at	1.24599	0.0302783
KCNN4	KCNN4|204401_at	1.01643	0.0166849
RHBDD3	RHBDD3|204402_at	0.959217	0.0173056
SLC12A2	SLC12A2|204404_at	-0.723083	0.00385333
APEX2	APEX2|204408_at	0.658705	0.0215539
IFI6	IFI6|204415_at	-3.79133	0.0017622
GALC	GALC|204417_at	-1.10953	0.00962126
MKLN1	MKLN1|204423_at	1.30318	0.00664377
TMED2	TMED2|204426_at	2.33702	0.0215365
TMED2	TMED2|204427_s_at	1.41581	0.0178644
LCAT	LCAT|204428_s_at	3.44601	0.00316118
NUPL1	NUPL1|204435_at	0.823962	0.023863
CD83	CD83|204440_at	3.07992	0.000572661
POLA2	POLA2|204441_s_at	0.504792	0.00034962
PDCL	PDCL|204448_s_at	-0.713238	0.0437556
GAS1	GAS1|204457_s_at	4.25153	0.0117702
EDNRA	EDNRA|204464_s_at	2.00259	0.00701611
GEM	GEM|204472_at	2.47173	0.00170979
ZNF592	ZNF592|204473_s_at	1.37528	0.00612481
PC	PC|204476_s_at	-1.10735	0.0308864
RABIF	RABIF|204477_at	-1.15625	0.0244155
C9orf16	C9orf16|204480_s_at	0.651249	0.0401068
ENO3	ENO3|204483_at	1.86163	0.0010182
DOLK	DOLK|204488_at	-1.74858	0.00235782
CD44	CD44|204489_s_at	-0.895041	0.025178
CD44	CD44|204490_s_at	-0.630397	0.0187899
ARHGAP11A	ARHGAP11A|204492_at	-0.763705	0.00884906
STRN3	STRN3|204496_at	0.812139	0.0324199
ADCY9	ADCY9|204497_at	-0.760636	1.4553e-05
AGTPBP1	AGTPBP1|204499_at	1.16197	0.0414095
AGTPBP1	AGTPBP1|204500_s_at	1.66712	0.00269744
PPP3R1	PPP3R1|204507_s_at	0.726309	0.0139692
CDC7	CDC7|204510_at	0.796874	0.012271
HIVEP1	HIVEP1|204512_at	1.53818	0.0242473
ATXN7	ATXN7|204516_at	0.830342	0.0203736
PPIC	PPIC|204517_at	-0.738392	0.000274689
PLLP	PLLP|204519_s_at	0.589306	0.0275413
BRD1	BRD1|204520_x_at	0.892876	0.00921075
ZNF140	ZNF140|204523_at	0.945986	0.0173564
TBC1D8	TBC1D8|204526_s_at	0.68544	0.00347077
NAP1L1	NAP1L1|204528_s_at	-1.09598	0.0489833
NPIPA1	NPIPA1|204538_x_at	0.950584	0.0258362
EEF1A2	EEF1A2|204540_at	0.970038	0.0257941
ST6GALNAC2	ST6GALNAC2|204542_at	-0.966029	0.00143449
PEX6	PEX6|204545_at	1.68427	0.00127527
RAB40B	RAB40B|204547_at	-2.17893	0.00211012
IKBKE	IKBKE|204549_at	2.29015	0.0050503
RAD54L	RAD54L|204558_at	-1.35931	0.000480394
FKBP5	FKBP5|204560_at	3.28913	0.000341288
PPM1D	PPM1D|204566_at	0.591909	0.00494718
ABCG1	ABCG1|204567_s_at	1.03529	0.0407254
ATG14	ATG14|204568_at	-1.30178	0.019052
COX7A1	COX7A1|204570_at	3.51645	0.023658
CROT	CROT|204573_at	-2.08828	0.00289445
CLUAP1	CLUAP1|204576_s_at	0.955128	0.00588852
CD22	CD22|204581_at	3.56282	0.00657916
L1CAM	L1CAM|204584_at	-1.33091	0.0378407
SLC25A14	SLC25A14|204587_at	-0.553335	0.0413283
MIEF1	MIEF1|204593_s_at	-1.00143	0.0302021
MIEF1	MIEF1|204594_s_at	-1.06077	0.00821338
STC1	STC1|204595_s_at	-3.72959	0.00516655
STC1	STC1|204596_s_at	-1.44452	0.00341775
STC1	STC1|204597_x_at	-3.5311	0.000143286
UBOX5	UBOX5|204598_at	-0.73472	0.0260158
EPHB3	EPHB3|204600_at	0.763776	0.0246257
N4BP1	N4BP1|204601_at	0.734568	0.0198828
DKK1	DKK1|204602_at	-3.54576	0.000759679
CGRRF1	CGRRF1|204605_at	1.33631	0.0136926
CCDC85B	CCDC85B|204610_s_at	-0.988804	0.0261233
PKIA	PKIA|204612_at	-1.4406	0.0237896
PLCG2	PLCG2|204613_at	1.14795	0.00754459
IDI1	IDI1|204615_x_at	-0.972682	0.00694182
GABPB1	GABPB1|204618_s_at	0.715483	0.00702586
TFF3	TFF3|204623_at	1.2779	0.0324278
ITGB3	ITGB3|204627_s_at	2.31539	0.021583
GOSR1	GOSR1|204630_s_at	0.879349	0.028591
RPS6KA5	RPS6KA5|204633_s_at	0.524695	0.000938152
RPS6KA5	RPS6KA5|204635_at	0.562685	0.0463123
ENOX2	ENOX2|204643_s_at	-0.970826	0.0407176
CCNT2	CCNT2|204645_at	1.33484	0.0198438
DPYD	DPYD|204646_at	-1.90332	0.00186176
TROAP	TROAP|204649_at	0.90251	0.0154057
NRF1	NRF1|204651_at	0.512107	0.038321
TFAP2A	TFAP2A|204653_at	0.591465	0.0443003
GFER	GFER|204659_s_at	1.23233	0.005878
ISG20	ISG20|204698_at	0.943906	0.00147822
DIEXF	DIEXF|204700_x_at	-1.0068	0.00385352
NFE2L3	NFE2L3|204702_s_at	-0.941362	0.0385256
WIPI2	WIPI2|204710_s_at	-1.60869	0.00911922
KIAA0753	KIAA0753|204711_at	1.11481	0.0290021
EPHB6	EPHB6|204718_at	-1.23036	0.0384466
DNAJC6	DNAJC6|204720_s_at	1.18106	0.00215287
NCK1	NCK1|204725_s_at	1.09892	0.0351914
WDHD1	WDHD1|204727_at	0.671678	0.0392037
STX1A	STX1A|204729_s_at	1.72791	0.047391
PDE4A	PDE4A|204735_at	1.30349	0.0351408
CNKSR1	CNKSR1|204740_at	0.918706	0.00305474
PDS5B	PDS5B|204742_s_at	1.18219	0.00893722
IARS	IARS|204744_s_at	-1.51925	0.00428159
MT1G	MT1G|204745_x_at	1.07844	0.00231885
HLF	HLF|204753_s_at	3.88292	0.00321255
HLF	HLF|204755_x_at	3.44791	0.0220842
RCBTB2	RCBTB2|204759_at	1.24187	0.0140305
NR1D1	NR1D1|204760_s_at	4.52591	0.0223846
THRA	THRA|204760_s_at	4.52591	0.0223846
FEN1	FEN1|204767_s_at	-1.5645	0.0087576
TTF1	TTF1|204772_s_at	0.697	0.00255321
EVI2A	EVI2A|204774_at	-3.22465	0.0249219
HOXB7	HOXB7|204778_x_at	1.58981	0.00923178
FAS	FAS|204780_s_at	2.10468	0.00147502
FAS	FAS|204781_s_at	2.04355	0.0287106
MLF1	MLF1|204783_at	-0.616783	0.0265062
MLF1	MLF1|204784_s_at	-2.06002	0.00290457
IFNAR2	IFNAR2|204785_x_at	-0.694774	0.0227446
PPOX	PPOX|204788_s_at	-0.547295	0.0297552
NR2C1	NR2C1|204791_at	1.30875	0.00343821
GPRASP1	GPRASP1|204793_at	1.5257	0.0115883
DUSP2	DUSP2|204794_at	-1.25119	0.0357438
PRR3	PRR3|204795_at	1.31075	0.0443684
RRAD	RRAD|204802_at	3.76686	0.00158543
HLA-F	HLA-F|204806_x_at	1.28043	0.0124247
NAV3	NAV3|204823_at	-1.70062	0.0139604
MELK	MELK|204825_at	-1.14174	0.0162154
ENPEP	ENPEP|204844_at	1.17051	0.0102547
ENPEP	ENPEP|204845_s_at	2.10072	0.0050968
ZBTB11	ZBTB11|204847_at	0.749452	0.0109946
TCFL5	TCFL5|204849_at	-0.591489	0.00928755
ORC2	ORC2|204853_at	0.937246	0.00381039
LEPREL2	LEPREL2|204854_at	-2.80223	0.000996168
B3GNT3	B3GNT3|204856_at	-0.69535	0.00848135
MAD1L1	MAD1L1|204857_at	2.57407	0.0165156
NME3	NME3|204862_s_at	1.054	0.0202542
IL6ST	IL6ST|204863_s_at	2.1463	0.00698524
GCHFR	GCHFR|204867_at	1.78103	0.0120485
TLE4	TLE4|204872_at	-1.74657	0.0112977
PEX1	PEX1|204873_at	1.56323	0.00522678
UGCG	UGCG|204881_s_at	-1.45211	0.00164032
PLK4	PLK4|204886_at	-0.590562	0.00818066
NEURL1	NEURL1|204889_s_at	-0.967958	0.0187385
EEF1A1	EEF1A1|204892_x_at	-0.644574	0.00785385
PTGER4	PTGER4|204897_at	-2.44725	0.000586932
SAP30	SAP30|204899_s_at	2.38655	0.0275085
SAP30	SAP30|204900_x_at	0.698912	0.0237433
ATG4B	ATG4B|204903_x_at	1.43706	0.00564672
EEF1E1	EEF1E1|204905_s_at	-0.514012	0.00637977
BCL3	BCL3|204907_s_at	2.35034	0.00245145
MIR8085	MIR8085|204907_s_at	2.35034	0.00245145
BCL3	BCL3|204908_s_at	3.62612	0.00505454
MIR8085	MIR8085|204908_s_at	3.62612	0.00505454
CPS1	CPS1|204920_at	-1.62627	0.0219789
C11orf80	C11orf80|204922_at	0.62737	0.0345565
RASSF7	RASSF7|204927_at	1.12733	0.0157241
BNIP1	BNIP1|204930_s_at	1.79336	0.005158
TNFRSF11B	TNFRSF11B|204932_at	-2.66908	0.00189098
TNFRSF11B	TNFRSF11B|204933_s_at	-3.84601	0.000953196
PTPN2	PTPN2|204935_at	1.88732	0.0259968
MAP4K2	MAP4K2|204936_at	2.98455	0.00190801
ZNF274	ZNF274|204937_s_at	0.809538	0.00931114
PTPRG	PTPRG|204944_at	-1.16853	0.00395491
TOP3A	TOP3A|204946_s_at	1.19594	0.0128783
LYPD3	LYPD3|204952_at	-2.14802	0.00105783
ORC5	ORC5|204957_at	1.02304	0.000996148
PLK3	PLK3|204958_at	2.78853	0.0141284
CENPA	CENPA|204962_s_at	-0.730986	0.00150269
SLC35F6	SLC35F6|204962_s_at	-0.730986	0.00150269
RDX	RDX|204969_s_at	-1.0876	0.00947153
CSTA	CSTA|204971_at	-1.21151	0.00824993
EMP2	EMP2|204975_at	-0.599712	0.0128569
DDX10	DDX10|204977_at	1.12036	0.00870965
CLASRP	CLASRP|204978_at	1.34832	0.00123648
SLC22A18	SLC22A18|204981_at	0.513039	0.00451279
GPC4	GPC4|204983_s_at	-0.678104	0.0444406
GNAZ	GNAZ|204993_at	-1.23429	0.017356
ATF5	ATF5|204999_s_at	1.12704	0.0130308
TFF1	TFF1|205009_at	-0.868201	0.00553113
GNL3L	GNL3L|205010_at	-0.927926	0.00581333
TGFA	TGFA|205016_at	2.59133	0.00266653
MBNL2	MBNL2|205018_s_at	4.74459	0.00451907
ZBTB48	ZBTB48|205025_at	1.52993	0.0107775
FABP7	FABP7|205029_s_at	1.91247	0.0228954
CCNE2	CCNE2|205034_at	-0.905766	0.00905061
IFT27	IFT27|205037_at	-0.805952	0.0374695
ORM1	ORM1|205040_at	2.14185	0.0203062
CENPE	CENPE|205046_at	0.742143	0.00481151
PSPH	PSPH|205048_s_at	0.852865	0.0392339
PRIM1	PRIM1|205053_at	0.885009	0.0031799
IDUA	IDUA|205059_s_at	0.609645	0.0231344
EXOSC9	EXOSC9|205061_s_at	0.61456	0.013491
ARID4A	ARID4A|205062_x_at	1.59118	0.0061202
SPRR1B	SPRR1B|205064_at	-1.50928	0.0268003
ENPP1	ENPP1|205066_s_at	-1.1269	0.00809032
ARHGAP26	ARHGAP26|205068_s_at	1.87584	0.00133764
ING3	ING3|205070_at	0.648925	0.00295489
SLC22A5	SLC22A5|205074_at	0.511317	0.0452574
MTMR11	MTMR11|205076_s_at	1.32057	0.00105611
PIGF	PIGF|205077_s_at	-1.24211	0.00764724
PIGF	PIGF|205078_at	-0.900094	0.00878025
CRIP1	CRIP1|205081_at	1.07371	0.0332313
AOX1	AOX1|205083_at	-1.49916	0.0243303
NAGPA	NAGPA|205090_s_at	-1.76444	0.0187677
ZBTB1	ZBTB1|205092_x_at	1.8953	0.000709286
CCR1	CCR1|205098_at	-0.871952	0.016482
GFPT2	GFPT2|205100_at	2.01839	0.0105477
TMPRSS2	TMPRSS2|205102_at	1.81706	0.0185321
RBM19	RBM19|205115_s_at	-0.655417	0.0393447
PLCD1	PLCD1|205125_at	1.0453	0.0079031
VRK2	VRK2|205126_at	1.30437	0.000683507
MOK	MOK|205130_at	0.869893	0.0481006
HSPE1	HSPE1|205133_s_at	-1.40265	0.00179707
NUFIP1	NUFIP1|205134_s_at	1.29045	0.00427752
NUFIP1	NUFIP1|205135_s_at	1.00663	0.0105154
UST	UST|205139_s_at	0.549993	0.0189065
MYL5	MYL5|205145_s_at	0.882494	0.000248837
LRRN2	LRRN2|205154_at	2.51491	0.0154827
SPTBN2	SPTBN2|205155_s_at	3.37547	0.0221195
RNASE4	RNASE4|205158_at	2.41775	0.00218972
GCAT	GCAT|205164_at	2.91866	0.0143015
CELSR3	CELSR3|205165_at	1.52971	0.0030656
RBBP5	RBBP5|205169_at	-0.744009	0.00204479
QPCT	QPCT|205174_s_at	1.77222	0.00493402
ZSCAN9	ZSCAN9|205181_at	1.18819	0.00112072
ZNF324	ZNF324|205182_s_at	1.93104	0.00968195
DNALI1	DNALI1|205186_at	2.68698	0.00523081
SMAD5	SMAD5|205188_s_at	1.12114	0.0160086
MAP3K14	MAP3K14|205192_at	1.78072	0.00797727
AP1S1	AP1S1|205195_at	-0.862184	0.0038468
AP1S1	AP1S1|205196_s_at	-0.608923	0.0464657
RELB	RELB|205205_at	4.33544	0.000618738
STK17B	STK17B|205214_at	0.79014	0.0152813
GALK2	GALK2|205219_s_at	1.19005	0.0100174
SURF2	SURF2|205224_at	2.00818	0.00218805
ESR1	ESR1|205225_at	-0.91105	0.00497384
COCH	COCH|205229_s_at	-2.2508	0.0406147
PAFAH2	PAFAH2|205233_s_at	-1.18282	0.0331618
KIF20B	KIF20B|205235_s_at	0.971639	0.0062234
AREG	AREG|205239_at	-1.19609	0.00476465
PEX13	PEX13|205246_at	1.29871	0.00143568
DOPEY2	DOPEY2|205248_at	0.777421	0.0252322
EGR2	EGR2|205249_at	1.98432	0.0191825
CEP290	CEP290|205250_s_at	1.64285	0.0273765
PER2	PER2|205251_at	1.72288	0.00115468
INHBB	INHBB|205258_at	0.852177	0.016326
LIF	LIF|205266_at	1.93074	0.000155389
LCP2	LCP2|205269_at	2.23311	0.0127337
GAD1	GAD1|205278_at	2.6991	0.0107424
LRP8	LRP8|205282_at	-2.5944	0.00390217
FKTN	FKTN|205283_at	-1.02151	0.0318989
TFAP2C	TFAP2C|205286_at	0.760706	0.00307619
TFAP2C	TFAP2C|205287_s_at	2.62548	0.00159313
HNRNPA2B1	HNRNPA2B1|205292_s_at	-1.76988	0.00298356
CKMT2	CKMT2|205295_at	1.75941	0.047714
BTN2A2	BTN2A2|205298_s_at	1.54089	0.00924623
BTN2A2	BTN2A2|205299_s_at	1.45972	0.00875581
KCNJ8	KCNJ8|205303_at	-0.988392	0.0223476
KCNJ8	KCNJ8|205304_s_at	-1.56242	0.0446688
KMO	KMO|205306_x_at	6.86881	0.01844
SNTB2	SNTB2|205314_x_at	-0.987042	0.0144331
EIF2S3	EIF2S3|205321_at	0.50533	0.0445118
RAMP3	RAMP3|205326_at	1.00551	0.000781725
S100A1	S100A1|205334_at	1.35745	0.0201705
BARD1	BARD1|205345_at	0.817226	0.00064148
PEBP1	PEBP1|205353_s_at	-0.990177	0.0089823
PFDN4	PFDN4|205360_at	2.61131	0.00908178
PFDN4	PFDN4|205361_s_at	-0.546961	0.0039051
DBT	DBT|205370_x_at	-0.621403	0.0195325
ACHE	ACHE|205377_s_at	2.42535	0.0414118
CBR3	CBR3|205379_at	1.51194	0.00637103
PDZK1	PDZK1|205380_at	-0.943642	0.0482176
CFD	CFD|205382_s_at	0.774228	0.0304749
MDM2	MDM2|205386_s_at	1.46914	0.00948063
CHEK1	CHEK1|205393_s_at	0.589232	0.0168139
SMAD3	SMAD3|205398_s_at	-1.22225	0.0270806
DCLK1	DCLK1|205399_at	-1.04782	0.0497037
SEMA5A	SEMA5A|205405_at	-3.56261	0.0018562
SPA17	SPA17|205406_s_at	-0.662884	0.0349324
MLLT10	MLLT10|205408_at	1.54904	0.0316678
DAG1	DAG1|205417_s_at	-0.71055	0.0266245
BMP5	BMP5|205430_at	-2.66956	0.00315809
BMP5	BMP5|205431_s_at	-3.31382	0.00369191
H2AFX	H2AFX|205436_s_at	-0.612677	0.00201093
ZNF211	ZNF211|205437_at	1.68138	0.00209715
NPY1R	NPY1R|205440_s_at	-0.797626	0.0157037
SNAPC1	SNAPC1|205443_at	1.45003	0.00208836
PRL	PRL|205445_at	2.60455	0.0471217
SAC3D1	SAC3D1|205449_at	0.685113	0.0304902
HPCAL1	HPCAL1|205462_s_at	1.9012	0.00318611
CRLF3	CRLF3|205474_at	0.548966	0.0259496
PLAU	PLAU|205479_s_at	2.51908	0.0397036
ADORA1	ADORA1|205481_at	3.73604	0.0499095
VGLL1	VGLL1|205487_s_at	2.42902	0.0338993
SRPX2	SRPX2|205499_at	0.913779	0.00754419
FLJ10038	FLJ10038|205510_s_at	-1.44101	0.0236374
FLJ10038	FLJ10038|205511_at	-1.01871	0.0115625
HAPLN1	HAPLN1|205523_at	3.66948	0.00312862
KATNA1	KATNA1|205526_s_at	1.50731	0.00110958
GEMIN4	GEMIN4|205527_s_at	-1.20452	0.0182081
ETFDH	ETFDH|205530_at	-1.6675	0.0103964
GLS2	GLS2|205531_s_at	1.24332	0.0268815
PCDH7	PCDH7|205534_at	-1.48707	0.0176767
AVIL	AVIL|205539_at	1.52384	0.0075362
HSPA4L	HSPA4L|205543_at	1.58952	0.00636609
TYK2	TYK2|205546_s_at	0.703639	0.0456346
BTG3	BTG3|205548_s_at	1.18067	0.00685345
BRE	BRE|205550_s_at	0.909178	0.00860783
MSX2	MSX2|205555_s_at	1.88567	0.0148215
FXN	FXN|205565_s_at	0.724881	0.0102666
LIPT1	LIPT1|205571_at	0.852355	0.0161922
NOS3	NOS3|205581_s_at	0.863593	0.00741281
ALG13	ALG13|205583_s_at	1.05611	0.0126455
ALG13	ALG13|205584_at	1.49651	0.00965253
RASGRP1	RASGRP1|205590_at	-0.637374	0.0122708
PDE9A	PDE9A|205593_s_at	1.72456	0.00172703
SMURF2	SMURF2|205596_s_at	-0.646254	0.0267736
SYT17	SYT17|205613_at	-2.24892	0.0328521
ALKBH1	ALKBH1|205621_at	1.94241	0.00249539
SMPD2	SMPD2|205622_at	0.915824	0.0365999
ALAS1	ALAS1|205633_s_at	1.53434	0.017623
NCAM2	NCAM2|205669_at	-1.69145	0.0306088
GAL3ST1	GAL3ST1|205670_at	1.93876	0.0476686
XPA	XPA|205672_at	1.5219	0.00582248
ASB9	ASB9|205673_s_at	0.556192	0.00302637
CYP27B1	CYP27B1|205676_at	1.26083	0.0388631
AP3B2	AP3B2|205678_at	1.66954	0.00837126
PCNXL2	PCNXL2|205689_at	3.25744	0.0149865
BUD31	BUD31|205690_s_at	0.594796	0.00249287
SYNGR3	SYNGR3|205691_at	1.2512	0.00649888
GFRA1	GFRA1|205696_s_at	-0.678664	0.0078486
PKP1	PKP1|205724_at	1.15954	0.0447578
RBM42	RBM42|205740_s_at	0.832366	0.0242126
DTNA	DTNA|205741_s_at	1.16845	0.0101881
ADAM17	ADAM17|205746_s_at	0.672589	0.00935274
CYP1A1	CYP1A1|205749_at	6.371	0.00128957
BPHL	BPHL|205750_at	0.67007	0.0306766
F2	F2|205754_at	-2.82634	0.00126154
SULT2B1	SULT2B1|205759_s_at	2.01247	0.00359911
DUS4L	DUS4L|205761_s_at	0.613905	0.0329128
TCAP	TCAP|205766_at	-3.12889	0.0245395
SLC27A2	SLC27A2|205768_s_at	-0.560517	0.0095202
CPEB3	CPEB3|205773_at	1.94853	0.0303774
F12	F12|205774_at	0.540925	0.000425347
FAM50B	FAM50B|205775_at	0.951773	0.00742011
ITGAM	ITGAM|205786_s_at	4.00398	0.0145823
TRPC1	TRPC1|205802_at	2.64953	0.00593165
TRPC1	TRPC1|205803_s_at	2.49478	0.00229346
TUFT1	TUFT1|205807_s_at	1.03878	0.00885875
POLG2	POLG2|205811_at	1.02208	0.021736
TMED9	TMED9|205812_s_at	-1.20087	0.00121329
ITGB8	ITGB8|205816_at	0.79032	0.0118462
HMGCS1	HMGCS1|205822_s_at	-1.12108	0.0462661
RGS12	RGS12|205823_at	-1.02811	0.0430929
MMP3	MMP3|205828_at	-1.88167	0.0204241
CPA4	CPA4|205832_at	-0.532696	0.0371374
YTHDC2	YTHDC2|205836_s_at	1.96593	0.00379312
CRAT	CRAT|205843_x_at	-1.93384	0.0157345
NME6	NME6|205851_at	1.1296	0.0146149
PLGLB1	PLGLB1|205871_at	0.845199	0.0252907
PLGLB2	PLGLB2|205871_at	0.845199	0.0252907
LIFR	LIFR|205876_at	2.96256	0.00210791
ADD3	ADD3|205882_x_at	0.877846	0.0373963
JAKMIP2	JAKMIP2|205888_s_at	-0.888527	0.00892524
GABBR1	GABBR1|205890_s_at	9.30678	0.000800303
UBD	UBD|205890_s_at	9.30678	0.000800303
SLC22A4	SLC22A4|205896_at	1.42488	0.0472411
CX3CR1	CX3CR1|205898_at	1.16587	0.0479136
CCNA1	CCNA1|205899_at	2.43624	0.0150962
KCNN3	KCNN3|205902_at	0.855997	0.0182746
MICA	MICA|205904_at	-1.58982	0.00602492
MICB	MICB|205905_s_at	-0.957556	0.00908077
MICA	MICA|205905_s_at	-0.957556	0.00908077
OMD	OMD|205907_s_at	-4.02888	0.0214052
S100A7	S100A7|205916_at	-2.66489	0.0385585
IL27RA	IL27RA|205926_at	1.06734	0.0187597
ZNF443	ZNF443|205928_at	0.803135	0.00525805
SETBP1	SETBP1|205933_at	1.53062	0.0198268
PPM1E	PPM1E|205938_at	3.68885	0.000113973
CLTCL1	CLTCL1|205944_s_at	2.61453	0.00664572
KCNK3	KCNK3|205952_at	1.16101	0.0183263
LRIG2	LRIG2|205953_at	0.934483	0.0158797
PSMC3IP	PSMC3IP|205956_x_at	1.09839	0.00291791
CSHL1	CSHL1|205958_x_at	-4.0562	0.0411744
PSIP1	PSIP1|205961_s_at	0.770345	0.0293533
DNAJA3	DNAJA3|205963_s_at	0.864956	0.02223
BATF	BATF|205965_at	1.99225	0.00106196
TAF13	TAF13|205966_at	-0.910548	0.0177254
FASTKD2	FASTKD2|205976_at	-1.32614	0.0179937
ING2	ING2|205981_s_at	0.660639	0.00494588
IL15	IL15|205992_s_at	2.55801	0.0188569
IQCB1	IQCB1|205995_x_at	0.713344	0.0107864
TGM3	TGM3|206004_at	1.13081	0.0107349
SOCS6	SOCS6|206020_at	-1.23213	0.0142627
SCAND2P	SCAND2P|206021_at	-0.637933	0.0450532
REL	REL|206036_s_at	1.48043	0.0088699
RAB33A	RAB33A|206039_at	0.642624	0.0311299
ATP2C2	ATP2C2|206043_s_at	1.20373	0.000795109
KIAA1549	KIAA1549|206044_s_at	1.22424	0.0229928
BRAF	BRAF|206044_s_at	1.22424	0.0229928
ADAM23	ADAM23|206046_at	1.70083	0.00754564
PTPN22	PTPN22|206060_s_at	0.943752	0.0307994
DICER1	DICER1|206061_s_at	-0.524824	0.00414457
RAD51C	RAD51C|206066_s_at	0.790107	0.0170177
LRRC23	LRRC23|206076_at	0.775947	0.0113977
SLC24A1	SLC24A1|206081_at	-1.38212	0.000162564
HCP5	HCP5|206082_at	2.95015	0.0251221
PTPRR	PTPRR|206084_at	1.83051	0.0220812
UGT1A7	UGT1A7|206094_x_at	-1.87484	0.0105882
UGT1A3	UGT1A3|206094_x_at	-1.87484	0.0105882
UGT1A8	UGT1A8|206094_x_at	-1.87484	0.0105882
UGT1A5	UGT1A5|206094_x_at	-1.87484	0.0105882
UGT1A6	UGT1A6|206094_x_at	-1.87484	0.0105882
UGT1A9	UGT1A9|206094_x_at	-1.87484	0.0105882
UGT1A1	UGT1A1|206094_x_at	-1.87484	0.0105882
UGT1A10	UGT1A10|206094_x_at	-1.87484	0.0105882
UGT1A4	UGT1A4|206094_x_at	-1.87484	0.0105882
SRSF10	SRSF10|206095_s_at	0.602857	0.00124888
ZBTB6	ZBTB6|206098_at	1.07112	0.0340545
PRKCH	PRKCH|206099_at	1.64699	0.027752
CPM	CPM|206100_at	-1.68103	0.012235
GINS1	GINS1|206102_at	-0.515757	0.00081525
SRSF6	SRSF6|206108_s_at	0.635369	0.00373522
FUT1	FUT1|206109_at	1.48357	0.0177096
HIST1H3A	HIST1H3A|206110_at	2.49004	0.000741649
HIST1H3I	HIST1H3I|206110_at	2.49004	0.000741649
HIST1H3J	HIST1H3J|206110_at	2.49004	0.000741649
HIST1H3E	HIST1H3E|206110_at	2.49004	0.000741649
HIST1H3F	HIST1H3F|206110_at	2.49004	0.000741649
HIST1H3D	HIST1H3D|206110_at	2.49004	0.000741649
HIST1H3B	HIST1H3B|206110_at	2.49004	0.000741649
HIST1H3G	HIST1H3G|206110_at	2.49004	0.000741649
HIST1H3H	HIST1H3H|206110_at	2.49004	0.000741649
HIST1H3C	HIST1H3C|206110_at	2.49004	0.000741649
RAB5A	RAB5A|206113_s_at	1.03462	0.000286677
EPHA4	EPHA4|206114_at	-1.90615	0.0483228
TPM1	TPM1|206116_s_at	1.0576	0.0107815
TPM1	TPM1|206117_at	1.08678	0.019147
FZD5	FZD5|206136_at	1.37895	0.00740072
PI4KB	PI4KB|206138_s_at	0.826421	0.0216471
PI4KB	PI4KB|206139_at	0.738369	0.0174508
LHX2	LHX2|206140_at	-2.15846	0.0478807
SLC26A3	SLC26A3|206143_at	3.16808	0.0221717
MAB21L1	MAB21L1|206163_at	2.75718	0.0116773
MIR548F5	MIR548F5|206163_at	2.75718	0.0116773
ZC3H7B	ZC3H7B|206169_x_at	-1.24847	0.0121466
GABPB1	GABPB1|206173_x_at	0.772019	0.0188827
ZNF134	ZNF134|206182_at	1.2625	0.0172305
ZNF623	ZNF623|206188_at	0.748474	0.0227625
CDSN	CDSN|206192_at	-1.97959	0.000129207
CEACAM7	CEACAM7|206198_s_at	2.8293	0.00620531
ANXA11	ANXA11|206200_s_at	-0.766666	0.0253275
WNT10B	WNT10B|206213_at	1.96054	0.0429491
LIG4	LIG4|206235_at	1.78665	0.00482515
YAF2	YAF2|206238_s_at	2.0342	0.0096374
SPINK1	SPINK1|206239_s_at	-1.34197	0.013894
KPNA5	KPNA5|206241_at	0.944103	0.0131029
TM4SF5	TM4SF5|206242_at	2.65663	0.0100567
MAP3K13	MAP3K13|206249_at	1.88413	0.0473668
ZNF239	ZNF239|206261_at	0.681692	0.0112916
LEFTY1	LEFTY1|206268_at	2.50162	0.00829727
P2RY2	P2RY2|206277_at	1.94105	0.00241836
CLTB	CLTB|206284_x_at	1.2521	0.00678669
ITIH4	ITIH4|206287_s_at	0.551762	0.0122984
PGGT1B	PGGT1B|206288_at	1.12547	0.0397266
TEC	TEC|206301_at	3.03377	0.00132457
MYBPH	MYBPH|206304_at	1.79709	0.0190602
FOXD1	FOXD1|206307_s_at	1.11172	0.0317535
PLA2G1B	PLA2G1B|206311_s_at	-1.6301	0.0485199
ZKSCAN7	ZKSCAN7|206314_at	1.15305	0.017239
DAPK2	DAPK2|206324_s_at	2.87567	0.0212748
ELAVL3	ELAVL3|206338_at	-0.528526	0.0382735
IL2RA	IL2RA|206341_at	-1.29678	0.0348638
IDS	IDS|206342_x_at	-0.979582	0.016496
PDK3	PDK3|206347_at	-1.25635	0.0288074
PDK3	PDK3|206348_s_at	-1.46623	0.0488829
APCS	APCS|206350_at	-0.706705	0.0253916
SOCS3	SOCS3|206359_at	1.47237	0.0239703
SOCS3	SOCS3|206360_s_at	2.22435	0.000578397
ANK3	ANK3|206385_s_at	-0.700335	0.0247812
PF4	PF4|206390_x_at	-0.909266	0.0336782
DGKG	DGKG|206395_at	-2.54503	0.0478175
RORC	RORC|206419_at	1.91906	0.00693795
B4GALNT1	B4GALNT1|206435_at	-0.984579	0.0186073
TCTN2	TCTN2|206438_x_at	0.53541	0.0495927
COMMD4	COMMD4|206441_s_at	-2.61442	0.000319887
PRMT1	PRMT1|206445_s_at	0.529004	0.0160365
TBCCD1	TBCCD1|206451_at	-1.21283	0.0132453
NDRG2	NDRG2|206453_s_at	-2.24152	0.0272929
DIO1	DIO1|206457_s_at	1.71356	0.0489889
MT1H	MT1H|206461_x_at	0.877705	0.0301433
DHRS2	DHRS2|206463_s_at	2.46808	0.00314668
ACSBG1	ACSBG1|206465_at	3.12999	0.00578844
FMO3	FMO3|206496_at	-3.07273	0.0283311
PML	PML|206503_x_at	-2.43267	0.0142809
PIP	PIP|206509_at	1.0937	0.0469414
T	T|206524_at	-0.696818	0.0487467
RIBC2	RIBC2|206526_at	2.84137	0.0339167
ABAT	ABAT|206527_at	0.863364	0.0375632
XIAP	XIAP|206536_s_at	1.1495	0.0286687
MRAS	MRAS|206538_at	2.95454	0.0066114
SMARCA2	SMARCA2|206543_at	-2.93101	0.00583866
SMARCA2	SMARCA2|206544_x_at	1.50318	0.00175193
ZNF85	ZNF85|206572_x_at	0.963226	0.018494
ZKSCAN8	ZKSCAN8|206579_at	3.33238	0.00691148
CCT6B	CCT6B|206587_at	0.609582	0.0229922
SLC16A5	SLC16A5|206599_at	-2.30432	0.0415783
[truncated: 4,238 more rows]
